# Supplementary material for: Identification of de novo mutations in the Chinese ASD cohort via whole-exome sequencing unveils brain regions implicated in autism
Source: medRxiv preprint, doi:10.1101/2021.07.14.21260545, version 1 (2021-07-22)
Supplement: Supplemental Table 1 [file 260545_file11.xlsx]

## Sheet: Sheet1
CHROM	POS	ID	REF	ALT	hiConfDeNovo	loConfDeNovo	Consequence	IMPACT	SYMBOL	HGVSc	HGVSp	cDNA_position	CDS_position	Protein_position	Amino_acids	Codons	Existing_variation	SIFT	PolyPhen	MAX_AF	MAX_AF_POPS	CLIN_SIG	CADD_PHRED	CADD_RAW	Conservation	ada_score	rf_score	DisGeNET_PMID	DisGeNET_SCORE	ExACpLI	LoFtool	LRT_pred	MutationAssessor_pred	MutationTaster_pred	PROVEAN_pred	Polyphen2_HDIV_pred	RepeatMasker	genomicSuperDups
chr1	23093467	rs761100989	C	A	SMHC01282s000	NA	missense_variant	MODERATE	LUZP1	ENST00000302291.8:c.795G>T	ENSP00000303758.4:p.Lys265Asn	1597/8898	795/3231	265/1076	K/N	aaG/aaT	rs761100989	deleterious(0)	possibly_damaging(0.698)	3.317e-05	gnomAD_SAS		23.2	2.91097	1.2					0.29	0.429	D	M&M&M&.	D&D&D&D	N&N&N&N	D&D&D&.
chr1	26200946	rs762393629	C	A	SMHC01028s000	NA	missense_variant	MODERATE	CATSPER4	ENST00000456354.7:c.1104C>A	ENSP00000390423.3:p.Asn368Lys	1130/1867	1104/1419	368/472	N/K	aaC/aaA	rs762393629	deleterious(0)	probably_damaging(0.996)				23.1	2.83329	1.29					0	0.153	D	.&M	D	N&N	.&D
chr1	37807999	.	G	A	NA	SMHC01353s000	missense_variant	MODERATE	YRDC	ENST00000373044.3:c.182C>T	ENSP00000362135.2:p.Pro61Leu	210/1848	182/840	61/279	P/L	cCg/cTg		deleterious(0.01)	benign(0.001)				23.2	2.89362	1.74					0.13		N	N	D&D&N	N	B
chr1	89934677	rs753883648	G	A	SMHC01311s000	NA	missense_variant	MODERATE	LRRC8D	ENST00000337338.9:c.1609G>A	ENSP00000338887.5:p.Asp537Asn	2016/3950	1609/2577	537/858	D/N	Gat/Aat	rs753883648	deleterious(0.01)	benign(0.348)	6.158e-05	gnomAD_AFR		24.7	3.48692	2.77					0.87	0.334	D	L&L	D&D	N&N	P&P
chr1	113123886	rs151009293	C	T	SMHC01003s000	NA	missense_variant	MODERATE	LRIG2	ENST00000361127.6:c.2983C>T	ENSP00000355396.4:p.Arg995Trp	3192/11566	2983/3198	995/1065	R/W	Cgg/Tgg	rs151009293&COSV100743625	deleterious(0)	benign(0.226)	0.0023	AFR		22.5	2.54289	1.34					0	0.938	N	L	N	N	D
chr1	151530739	rs1408237099	A	G	SMHC01208s000	NA	missense_variant	MODERATE	CGN	ENST00000271636.12:c.2564A>G	ENSP00000271636.7:p.Asn855Ser	2707/5101	2564/3612	855/1203	N/S	aAc/aGc	rs1408237099	tolerated(0.14)	probably_damaging(0.954)				23.8	3.15739	3.11					0	0.782	D		D	N
chr1	155133553	.	G	T	SMHC01351s000	NA	missense_variant	MODERATE	EFNA1	ENST00000368407.8:c.439G>T	ENSP00000357392.3:p.Val147Phe	541/1552	439/618	147/205	V/F	Gtc/Ttc		deleterious(0)	probably_damaging(0.948)				24.9	3.56998	1.02					0.87	0.147	D	M	D&D	D	D
chr1	157587329	rs1023073972	G	C	SMHC90004sfd0	NA	missense_variant	MODERATE	FCRL4	ENST00000271532.2:c.794C>G	ENSP00000271532.1:p.Thr265Arg	935/3466	794/1548	265/515	T/R	aCa/aGa	rs1023073972	deleterious(0)	possibly_damaging(0.692)				18.93	1.95682	1.38					0	0.835	N	M	N	D	P
chr1	185984197	rs112809015	G	A	SMHC01081s000	NA	missense_variant	MODERATE	HMCN1	ENST00000271588.9:c.2819G>A	ENSP00000271588.4:p.Arg940His	3208/18368	2819/16908	940/5635	R/H	cGc/cAc	rs112809015&COSV54917200	deleterious(0)	probably_damaging(0.999)	0.0002462	gnomAD_AFR		28.7	4.2032	2.67					0	0.675	D	N	D&D	D	D
chr1	212883404	rs372728084	C	T	SMHC01432s000	NA	missense_variant	MODERATE	FLVCR1	ENST00000366971.9:c.1058C>T	ENSP00000355938.4:p.Thr353Met	1236/5919	1058/1668	353/555	T/M	aCg/aTg	rs372728084	deleterious(0)	probably_damaging(1)	0.0001164	EA		26.5	3.92774	2.04					0	0.465	D	M	D	D	D
chr3	58163325	.	C	A	SMHC01081s000	NA	missense_variant	MODERATE	FLNB	ENST00000490882.5:c.7286C>A	ENSP00000420213.1:p.Thr2429Asn	7451/8079	7286/7902	2429/2633	T/N	aCc/aAc		tolerated(0.34)	possibly_damaging(0.733)				19.6	2.04534	0.631					0	0.00269	D	.&M&.&.&.	D&D&D&D&D&D&D&D	N&N&N&N&N	.&B&B&.&B
chr3	129606423	.	G	T	NA	SMHC01028s000	missense_variant	MODERATE	PLXND1	ENST00000324093.9:c.217C>A	ENSP00000317128.4:p.Leu73Met	254/6913	217/5778	73/1925	L/M	Ctg/Atg		tolerated(0.06)	probably_damaging(0.999)				23.4	3.01627	-0.159					1	0.16	U	M	D&D	N	D
chr5	88823745	rs1202957297	C	T	SMHC01432s000	NA	missense_variant	MODERATE	MEF2C	ENST00000340208.9:c.44G>A	ENSP00000340874.5:p.Arg15His	421/6192	44/1452	15/483	R/H	cGt/cAt	rs1202957297&COSV60928546	deleterious(0)	probably_damaging(0.998)	0	gnomAD_AFR&gnomAD_AMR&gnomAD_ASJ&gnomAD_EAS&gnomAD_FIN&gnomAD_NFE&gnomAD_OTH&gnomAD_SAS	likely_pathogenic	29.6	4.29864	3.38				0.7	0	0.391	D	M&M&M&.&M&M&M&.&M&.&.&M&M&M&M&.&M&.&M&.&.&.&.&.&.&.&.&.&.	D&D&D&D&D&D&D&D&D&D	D&D&D&.&.&.&D&.&D&D&D&.&D&.&.&.&D&.&.&D&D&.&D&D&D&D&.&D&D	D&.&.&.&.&.&D&.&.&.&.&.&.&D&D&.&D&.&.&.&.&.&.&.&.&.&.&.&.
chr6	33267933	.	C	T	SMHC01348s000	NA	missense_variant	MODERATE	VPS52	ENST00000445902.3:c.865G>A	ENSP00000409952.2:p.Val289Met	1066/2936	865/2172	289/723	V/M	Gtg/Atg		deleterious(0.01)	probably_damaging(0.987)				25.3	3.67899	2.06					0.02	0.241	D	M	D&D&D	N	D
chr6	75886867	.	G	A	SMHC00912s000	NA	missense_variant	MODERATE	MYO6	ENST00000369981.7:c.2531G>A	ENSP00000358998.4:p.Gly844Asp	2810/8692	2531/3888	844/1295	G/D	gGc/gAc	COSV64121560	tolerated(0.36)	benign(0.015)				19.66	2.05353	2.67					0.02	0.179	D	.&N&N&N&.&.	D&D&D&D	N&N&N&.&N&.	.&P&B&P&.&.
chr7	290771	.	T	C	SMHC01057s000	NA	missense_variant	MODERATE	FOXL3	ENST00000506382.2:c.226T>C	ENSP00000492766.1:p.Trp76Arg	226/702	226/702	76/233	W/R	Tgg/Cgg		deleterious(0)	probably_damaging(0.999)				31	4.38959	1.91
chr7	4113314	rs766241783	G	T	SMHC01042s000	NA	missense_variant	MODERATE	SDK1	ENST00000404826.7:c.3460G>T	ENSP00000385899.2:p.Val1154Phe	3795/10593	3460/6642	1154/2213	V/F	Gtt/Ttt	rs766241783	deleterious(0)	probably_damaging(0.999)	0	gnomAD_AFR&gnomAD_AMR&gnomAD_ASJ&gnomAD_EAS&gnomAD_FIN&gnomAD_NFE&gnomAD_OTH&gnomAD_SAS		27.6	4.08042	2.39					0.01	0.433	D	M&.&.	D&D	D&D&.	D&D&.
chr7	64814990	rs375651103	C	T	SMHC01197s000	NA	missense_variant	MODERATE	ZNF138	ENST00000307355.12:c.76C>T	ENSP00000303533.7:p.Arg26Trp	217/2579	76/960	26/319	R/W	Cgg/Tgg	rs375651103	deleterious(0.04)	probably_damaging(0.947)	6.535e-05	gnomAD_SAS		17.82	1.81184						0	0.818		.&.&.&.&.&.	N&N&N&N&N&N	D&.&D&D&D&D	.&.&.&.&.&B
chr7	102248779	rs1430314955	G	T	NA	SMHC01432s000	missense_variant	MODERATE	CUX1	ENST00000360264.7:c.4288G>T	ENSP00000353401.3:p.Asp1430Tyr	4308/13762	4288/4551	1430/1516	D/Y	Gac/Tac	rs1430314955	tolerated(0.05)	benign(0.264)				22.9	2.74	0.361					1	0.407	N	.&.&.&N&N&.&.&.	D&D&D&D&D&D&D&D&N&N&N&N&N	.&.&N&N&.&N&N&N	.&.&P&B&B&.&.&.
chr7	117540269	rs397508147	C	T	SMHC01304d000	NA	missense_variant	MODERATE	CFTR	ENST00000003084.11:c.1039C>T	ENSP00000003084.6:p.Arg347Cys	1109/6070	1039/4443	347/1480	R/C	Cgc/Tgc	rs397508147&CM931146&COSV50040443	deleterious(0)	probably_damaging(0.999)	0.000123	gnomAD_AFR	uncertain_significance&not_provided	29	4.23415	2.17					0	0.0235	D	M&.&.&.&M	D&D	D&.&.&D&.	D&.&.&.&.
chr8	38846719	rs200636791	A	G	SMHC90003s000	NA	missense_variant	MODERATE	TACC1	ENST00000317827.9:c.2249A>G	ENSP00000321703.4:p.Gln750Arg	2596/7770	2249/2418	750/805	Q/R	cAg/cGg	rs200636791	deleterious(0)	possibly_damaging(0.546)	0.0001319	gnomAD_NFE		26.3	3.88545	1.15					0.02	0.755	D	.&.&.&L&.&.&.	D&D&D&D&D&D&D&D&D&D&D	D&D&D&D&D&D&D	B&.&B&B&B&B&.
chr8	109968150	.	G	A	SMHC01288s000	NA	stop_gained	HIGH	KCNV1	ENST00000524391.6:c.1441C>T	ENSP00000435954.1:p.Arg481Ter	2398/6912	1441/1503	481/500	R/*	Cga/Tga	COSV99819084						38	7.36218	1.25					0.78	0.0866	N	.&.	D&D	.&.	.&.
chr9	137070057	.	A	G	NA	SMHC01340s000	missense_variant	MODERATE	SAPCD2	ENST00000409687.5:c.404T>C	ENSP00000386348.3:p.Leu135Pro	501/3814	404/1185	135/394	L/P	cTg/cCg		deleterious(0.05)	benign(0.003)				23.3	2.92859	0.648					0		U	L	D	N	B
chr10	94171243	.	G	T	SMHC90004s000	NA	missense_variant	MODERATE	PLCE1	ENST00000371380.8:c.1556G>T	ENSP00000360431.2:p.Ser519Ile	2248/12481	1556/6909	519/2302	S/I	aGc/aTc		deleterious(0)	probably_damaging(0.98)				26.6	3.94722	2.73					0.2	0.802	D	L&.&.	D&D&D&D	N&N&N	D&D&D
chr10	132690392	.	G	A	SMHC00852d000	NA	missense_variant&splice_region_variant	MODERATE	INPP5A	ENST00000368594.8:c.307G>A	ENSP00000357583.3:p.Ala103Thr	617/3000	307/1239	103/412	A/T	Gca/Aca	COSV61248624	deleterious(0)	probably_damaging(0.999)				32	4.6933	1.76	0.996286	0.816			0.94	0.178	D	M&.&.	D&D	D&D&D	D&P&.
chr11	122115826	rs764846072	A	C	SMHC01296s000	NA	missense_variant	MODERATE	BLID	ENST00000560104.2:c.97T>G	ENSP00000453153.1:p.Ser33Ala	390/876	97/327	33/108	S/A	Tct/Gct	rs764846072	deleterious_low_confidence(0)	benign(0.376)	0	gnomAD_AFR&gnomAD_AMR&gnomAD_ASJ&gnomAD_EAS&gnomAD_FIN&gnomAD_NFE&gnomAD_OTH&gnomAD_SAS		17.34	1.74552	-0.694					0.59			N	N	D	P
chr12	12181394	rs759106535	C	T	SMHC90004s000	NA	missense_variant	MODERATE	LRP6	ENST00000261349.9:c.1022G>A	ENSP00000261349.4:p.Arg341His	1331/10252	1022/4842	341/1613	R/H	cGc/cAc	rs759106535&COSV53786736	deleterious(0)	benign(0.046)	0.0001635	gnomAD_OTH		23.8	3.16234	2.63					1	0.0402	D	M&.	D&D	D&D	B&B
chr12	26436348	.	T	C	SMHC01369d000	NA	splice_acceptor_variant	HIGH	ITPR2	ENST00000381340.8:c.6644-2A>G													34	5.65807	4.08	0.999972	0.818			0	0.139
chr12	51098864	rs1414251455	A	AT	SMHC01205s000	NA	frameshift_variant	HIGH	TFCP2	ENST00000257915.10:c.1330dup	ENSP00000257915.5:p.Ile444AsnfsTer29	2043-2044/3807	1330-1331/1509	444/502	I/NX	att/aAtt	rs1414251455						33	4.85165						0	0.792
chr12	51789303	.	A	G	SMHC01002s000	NA	missense_variant	MODERATE	SCN8A	ENST00000599343.5:c.4337A>G	ENSP00000476447.3:p.Glu1446Gly	4337/5976	4337/5976	1446/1991	E/G	gAg/gGg		deleterious(0.01)	possibly_damaging(0.79)				32	4.49402	3.15					1	0.0157	D	M&.&.&.&M	D&D	D&D&D&.&.	D&.&.&.&.
chr12	116576082	.	T	C	SMHC01299s000	NA	missense_variant	MODERATE	MAP1LC3B2	ENST00000556529.4:c.140T>C	ENSP00000450524.1:p.Leu47Pro	294/818	140/378	47/125	L/P	cTg/cCg		deleterious(0.01)	probably_damaging(0.999)				22.8	2.6983	2.22					0.02	0.712	U	M	D&D	D	D
chr12	132730079	.	G	GT	SMHC01208s000	NA	frameshift_variant	HIGH	ANKLE2	ENST00000357997.10:c.2082dup	ENSP00000350686.5:p.His695ThrfsTer41	2116-2117/4590	2082-2083/2817	694-695/938	-/X	-/A														0	0.805
chr13	45479027	.	T	C	SMHC01191s000	NA	missense_variant	MODERATE	COG3	ENST00000349995.10:c.344T>C	ENSP00000258654.8:p.Leu115Pro	442/4555	344/2487	115/828	L/P	cTg/cCg		deleterious(0)	possibly_damaging(0.896)				28.6	4.19741	2.94					1		D	M&M	D	D&.	D&D
chr14	35659136	.	AC	A	SMHC01239s000	NA	splice_donor_variant	HIGH	RALGAPA1	ENST00000680220.1:c.5387+1del															3.27					1	0.03
chr15	20534438	rs775072231	G	A	SMHC01003s000	NA	stop_gained	HIGH	GOLGA6L6	ENST00000619213.1:c.1996C>T	ENSP00000480376.1:p.Arg666Ter	2087/4013	1996/2175	666/724	R/*	Cga/Tga	rs775072231&COSV71180670			0.000483	gnomAD_ASJ		24.5	3.44826						0.09				A				chr15:28515369&chr15:22358242&chr15:28316058&chr15:23311344&chr15:30507063&chr15:32480667&chr16:53353853&chr15:23123714
chr15	62708628	.	C	G	SMHC01299s000	NA	missense_variant	MODERATE	TLN2	ENST00000561311.5:c.2299C>G	ENSP00000453508.1:p.Leu767Val	2529/11880	2299/7629	767/2542	L/V	Ctg/Gtg		tolerated(0.09)	probably_damaging(0.98)				22.7	2.62962	0.27					1	0.525	D	L	D&D	N	P
chr16	4817612	rs1250661152	G	A	SMHC01320s000	NA	missense_variant	MODERATE	GLYR1	ENST00000321919.14:c.892C>T	ENSP00000322716.6:p.Arg298Cys	915/3718	892/1662	298/553	R/C	Cgc/Tgc	rs1250661152	deleterious(0)	benign(0.313)				24.8	3.54148	1.56					1	0.108	D	.&H&H	D&D&D&D	D&D&.	D&D&D
chr16	69361448	.	T	C	SMHC01065s000	NA	missense_variant	MODERATE	TERF2	ENST00000254942.8:c.1382A>G	ENSP00000254942.3:p.Glu461Gly	1418/2996	1382/1629	461/542	E/G	gAa/gGa		deleterious(0.03)	probably_damaging(0.976)				23.9	3.22859	2.31					0.93	0.346	N	M	D
chr17	42592139	rs774835274	C	T	SMHC01296s000	NA	missense_variant	MODERATE	RETREG3	ENST00000309428.10:c.263G>A	ENSP00000309432.4:p.Arg88His	313/3749	263/1401	88/466	R/H	cGt/cAt	rs774835274&COSV100515092	tolerated(0.06)	benign(0.232)	0.0002951	gnomAD_SAS		23	2.78802	4.03							D	.&.	D&D&D	N&.	P&.
chr19	10923673	.	A	G	SMHC01306d000	NA	missense_variant	MODERATE	YIPF2	ENST00000586748.6:c.656T>C	ENSP00000466055.1:p.Leu219Pro	815/2111	656/951	219/316	L/P	cTg/cCg		deleterious(0)	probably_damaging(0.997)				26	3.83613	2.76					0	0.383	D	M&M&.&.&.	D&D&D	D&.&.&.&.	D&D&.&.&.
chr20	664156	rs760188191	CCCCCGCGCG	C	NA	SMHC01090s000	inframe_deletion	MODERATE	SCRT2	ENST00000246104.7:c.430_438del	ENSP00000246104.5:p.Arg144_Gly146del	631-639/3200	430-438/924	144-146/307	RAG/-	CGCGCGGGG/-	rs760188191			0.0009852	gnomAD_NFE		15.36	1.44209	-1.86					0.36
chr22	38303138	rs1460216619	C	T	SMHC01044s000	NA	missense_variant&splice_region_variant	MODERATE	CSNK1E	ENST00000396832.6:c.187G>A	ENSP00000380044.1:p.Val63Met	473/2817	187/1251	63/416	V/M	Gtg/Atg	rs1460216619	deleterious_low_confidence(0.01)	probably_damaging(0.949)	0	gnomAD_AFR&gnomAD_AMR&gnomAD_ASJ&gnomAD_EAS&gnomAD_FIN&gnomAD_NFE&gnomAD_OTH&gnomAD_SAS		34	5.43635	2.2	0.999992	0.998			0.97	0.348	D	M&M&M&.&.&.&.	D&D&D&D&D&D&D	N&N&N&N&N&N&N	D&D&D&D&P&.&.	(CCACCG)n
chr22	39488824	rs1276789863	C	T	SMHC01027d000	NA	missense_variant	MODERATE	MGAT3	ENST00000341184.7:c.1477C>T	ENSP00000345270.6:p.Arg493Trp	2024/5394	1477/1602	493/533	R/W	Cgg/Tgg	rs1276789863	deleterious(0.02)	possibly_damaging(0.636)	4.906e-05	gnomAD_FIN		23.6	3.06624	0.99					0.46	0.0378	N	M	N	D	D
chrX	133025895	.	T	A	SMHC01226d000	NA	missense_variant	MODERATE	USP26	ENST00000511190.5:c.2326A>T	ENSP00000423390.1:p.Thr776Ser	2796/3665	2326/2742	776/913	T/S	Aca/Tca	COSV100896753&COSV63709868	deleterious(0.02)	possibly_damaging(0.728)				1.728	0.056311						0.01	0.414	N	L&L	N&N&N	N&N	P&P
chrX	154030948	rs61751362	G	A	SMHC01316d000	NA	stop_gained	HIGH	MECP2	ENST00000453960.7:c.916C>T	ENSP00000395535.2:p.Arg306Ter	968/10343	916/1497	306/498	R/*	Cga/Tga	rs61751362&CM000750&CM023745&CX130322					pathogenic/likely_pathogenic&pathogenic&_risk_factor&pathogenic	37	7.29921	0.903			10767337&10814718&10814719&10944854&10991688&11058114&1105898&11214906&11245712&11462237&11524741&12180070&12770674&15173251&15526954&15737703&20031356&20815036&21966470&23696494&&16970893&20032810&27255190&20116947&11241840&16473305&17236109&18332345&19722030&23270700&26604147&27442528&	0.73&0.73&0.73&0.73&0.73&0.73&0.73&0.73&0.73&0.73&0.73&0.73&0.73&0.73&0.73&0.73&0.73&0.73&0.73&0.73&0.73&0.02&0.02&0.01&0.01&0.70&0.70&0.70&0.70&0.70&0.70&0.70&0.70&0.70	0.7	0.00365			A&A
chr1	10660398	rs755376754	G	A	SMHC01577s000	NA	missense_variant	MODERATE	CASZ1	ENST00000377022.8:c.644C>T	ENSP00000366221.3:p.Pro215Leu	960/7934	644/5280	215/1759	P/L	cCg/cTg	rs755376754	deleterious_low_confidence(0)	benign(0.182)	2.65e-05	gnomAD_NFE		22.8	2.70318	3.08					1	0.002	N	N&N	D&D	N&N	P&P
chr1	27100429	rs748512809	C	T	SMHC00814s000	NA	missense_variant	MODERATE	SLC9A1	ENST00000263980.8:c.2326G>A	ENSP00000263980.3:p.Asp776Asn	3117/4737	2326/2448	776/815	D/N	Gat/Aat	rs748512809	tolerated(0.05)	benign(0.04)	1.775e-05	gnomAD_NFE		21	2.21599	2.07					0.95	0.387	N	M	D&D&D	N	P
chr1	27550477	.	G	A	SMHC01933s000	NA	missense_variant	MODERATE	AHDC1	ENST00000374011.6:c.1639C>T	ENSP00000363123.2:p.Arg547Cys	2608/6438	1639/4812	547/1603	R/C	Cgc/Tgc	COSV55937770	deleterious(0)	probably_damaging(0.997)				25.2	3.65053	1.98					1	0.011	U	L&L&L&L&L	D&D	D&.&D&.&.	D&D&D&D&D
chr1	33571586	rs768845179	G	A	SMHC02129s000	NA	missense_variant	MODERATE	CSMD2	ENST00000373381.8:c.7903C>T	ENSP00000362479.4:p.Arg2635Cys	8080/13698	7903/10896	2635/3631	R/C	Cgc/Tgc	rs768845179&COSV53917194&COSV99588418	deleterious(0.01)	probably_damaging(0.973)	3.145e-05	gnomAD_AMR		31	4.39087	3.09						0.316	D	.&M&.	D	D&.&.	.&D&.
chr1	39967085	.	G	C	SMHC00815s000	NA	splice_acceptor_variant	HIGH	MFSD2A	ENST00000372809.5:c.967-1G>C													34	5.5283	3.37	0.999991	0.906			0.92	0.131
chr1	42851521	rs771659549	G	A	SMHC00938s000	NA	missense_variant	MODERATE	ZNF691	ENST00000372502.5:c.656G>A	ENSP00000361580.2:p.Arg219Gln	958/1910	656/948	219/315	R/Q	cGg/cAg	rs771659549&COSV100996097	deleterious(0)	possibly_damaging(0.852)	3.267e-05	gnomAD_SAS		25.1	3.61737						0.42	0.368	D	L&.&.&.&.&.&.	D&D&D&D&D&D&D	.&D&D&D&D&D&.	D&.&.&.&.&.&.
chr1	46281367	.	A	C	SMHC01549s000	NA	missense_variant	MODERATE	LRRC41	ENST00000617190.5:c.1514T>G	ENSP00000477792.1:p.Phe505Cys	1808/4136	1514/2439	505/812	F/C	tTc/tGc		deleterious(0.01)	probably_damaging(0.923)				28.4	4.17335	3.99					1	0.213	D	L&.&L&.	D	.&.&N&.	D&.&D&.
chr1	55134370	.	A	T	SMHC01873s000	NA	missense_variant	MODERATE	USP24	ENST00000294383.7:c.3245T>A	ENSP00000294383.5:p.Val1082Glu	3496/10800	3245/7863	1082/2620	V/E	gTa/gAa		deleterious(0)	possibly_damaging(0.655)				25.4	3.69436	2.22					1		D	L	D&D	D
chr1	177164499	.	AG	A	SMHC00859s000	NA	frameshift_variant	HIGH	ASTN1	ENST00000361833.7:c.177del	ENSP00000354536.2:p.Ser60ArgfsTer90	213/7138	177/3885	59/1294	P/X	ccC/cc	COSV56086015								1.14					1	0.162
chr1	204968286	.	TCC	T	SMHC01660s000	NA	frameshift_variant	HIGH	NFASC	ENST00000339876.11:c.747_748del	ENSP00000344786.6:p.Gln250GlyfsTer40	1075-1076/10336	745-746/3723	249/1240	P/X	CCc/c									2.58					1	0.529
chr1	213997014	.	A	G	SMHC01816s000	NA	missense_variant	MODERATE	PROX1	ENST00000498508.6:c.479A>G	ENSP00000420283.2:p.Glu160Gly	1095/8498	479/2214	160/737	E/G	gAg/gGg		deleterious(0)	probably_damaging(0.996)				29.6	4.29865	3.28					0.99	0.0397	D	.&L&L&L&L	D&D&D	D&D&D&D&D	.&D&D&D&D
chr1	225828863	.	A	G	SMHC01550s000	NA	missense_variant	MODERATE	EPHX1	ENST00000614058.4:c.134A>G	ENSP00000480004.1:p.Asp45Gly	343/1789	134/1368	45/455	D/G	gAc/gGc		deleterious(0.01)	probably_damaging(0.96)				26.7	3.95637	2.21					0	0.843	D	.&M&.&M&M	D&D	D&D&D&.&D	.&D&.&D&D
chr1	232009051	.	T	G	SMHC01862d000	NA	splice_donor_variant	HIGH	DISC1	ENST00000439617.8:c.2307+2T>G													23.3	2.94275	2.55	0.999944	0.93			0.02	0.823
chr1	237270603	.	C	A	SMHC01638s000	NA	missense_variant	MODERATE	RYR2	ENST00000366574.7:c.155C>A	ENSP00000355533.2:p.Thr52Asn	493/16583	155/14904	52/4967	T/N	aCt/aAt		deleterious(0)	possibly_damaging(0.69)				24.5	3.4487	3.18					1	0.0489		M&.	D	D&.	D&.
chr2	27435735	.	T	G	SMHC02016s000	NA	missense_variant	MODERATE	NRBP1	ENST00000379863.7:c.674T>G	ENSP00000369192.3:p.Ile225Ser	773/2174	674/1632	225/543	I/S	aTt/aGt		deleterious_low_confidence(0.01)	benign(0.087)				24.6	3.45195	2.94					1	0.288			D&D&N	N
chr2	29017945	rs373794845	G	A	SMHC02129s000	NA	missense_variant	MODERATE	TOGARAM2	ENST00000379558.5:c.1349G>A	ENSP00000368876.3:p.Arg450His	1700/3548	1349/3060	450/1019	R/H	cGc/cAc	rs373794845&COSV65420625	deleterious(0.01)	probably_damaging(0.913)	0.000246	EA		24.7	3.49355	1.87									D&D	N	D
chr2	32115814	.	T	C	SMHC01807s000	NA	missense_variant	MODERATE	SPAST	ENST00000315285.9:c.983T>C	ENSP00000320885.3:p.Ile328Thr	1259/5268	983/1851	328/616	I/T	aTa/aCa		deleterious(0)	probably_damaging(0.999)				26.4	3.90363	2.3					1	0.0336	D	M&M&.&.&.&.&.&.	D&D	D&.&D&.&.&.&.&.	D&D&.&.&.&.&.&.
chr2	43875162	rs761153163	C	T	SMHC01703s000	NA	missense_variant	MODERATE	ABCG8	ENST00000272286.4:c.1505C>T	ENSP00000272286.2:p.Pro502Leu	1588/7180	1505/2022	502/673	P/L	cCg/cTg	rs761153163&COSV55393664	deleterious(0)	probably_damaging(1)	5.782e-05	gnomAD_AMR		26.4	3.90067	2.48					0	0.275	D	M&M	D	.&D	D&D
chr2	47029302	.	C	A	SMHC00845s000	NA	missense_variant	MODERATE	TTC7A	ENST00000394850.6:c.1720C>A	ENSP00000378320.2:p.Leu574Met	1976/4306	1720/2649	574/882	L/M	Ctg/Atg		deleterious(0)	probably_damaging(0.999)				26.6	3.94326	2.5					0	0.832	D	.&M&M	D&D&D&D	N&N&N	D&D&.
chr2	61227165	.	T	A	SMHC01644s000	NA	missense_variant	MODERATE	USP34	ENST00000398571.7:c.7497A>T	ENSP00000381577.2:p.Glu2499Asp	7892/11675	7497/10641	2499/3546	E/D	gaA/gaT		tolerated(0.19)	possibly_damaging(0.878)				23.6	3.08016	1.56					1	0.111	N	N&.	D	N&N	P&.	(TCT)n
chr2	63437492	.	G	A	SMHC02028s000	NA	stop_gained	HIGH	WDPCP	ENST00000272321.12:c.562C>T	ENSP00000272321.7:p.Gln188Ter	768/4894	562/2241	188/746	Q/*	Cag/Tag							37	7.31415	3.05					0		D	.&.&.	A&A&A&D&D	.&.&.	.&.&.
chr2	73225888	rs1045421235	A	G	SMHC00844d000	NA	missense_variant	MODERATE	SMYD5	ENST00000389501.9:c.1199A>G	ENSP00000374152.4:p.Glu400Gly	1221/2554	1199/1257	400/418	E/G	gAg/gGg	rs1045421235	tolerated(0.21)	benign(0.403)				22.9	2.73115	2.08					0.1	0.518	N	L	D	N	P	(GAAGAG)n
chr2	90070062	.	C	A	SMHC00842s000	NA	missense_variant	MODERATE	IGKV6D-41	ENST00000390271.2:c.169C>A	ENSP00000374806.2:p.Gln57Lys	195/371	169/345	57/115	Q/K	Cag/Aag		deleterious(0.01)	possibly_damaging(0.816)				19.05	1.97228
chr2	96816909	rs190607200	T	C	NA	SMHC01856s000	missense_variant	MODERATE	CNNM3	ENST00000305510.4:c.632T>C	ENSP00000305449.3:p.Val211Ala	642/4900	632/2124	211/707	V/A	gTg/gCg	rs190607200	deleterious(0.01)	probably_damaging(0.955)	0	AFR&AMR&EAS&EUR&SAS		25.4	3.7063	-4.14							U	L&L	D&D	D&D	D&D
chr2	160275699	rs1177120214	G	A	SMHC01663d000	NA	stop_gained	HIGH	RBMS1	ENST00000348849.8:c.1159C>T	ENSP00000294904.6:p.Gln387Ter	1603/4286	1159/1221	387/406	Q/*	Cag/Tag	rs1177120214			4.622e-05	gnomAD_FIN		47	9.05377	2.7					1	0.365	N	.&.&.&.&.	A&A&A&A&A	.&.&.&.&.	.&.&.&.&.
chr2	165313909	.	G	A	SMHC01560s000	NA	missense_variant	MODERATE	SCN2A	ENST00000636071.2:c.1184G>A	ENSP00000490107.1:p.Arg395His	1561/8881	1184/6018	395/2005	R/H	cGt/cAt		deleterious(0)	probably_damaging(0.999)				31	4.38675	2.3					1	0.00145	D	.&M&M&.&M&M&M&M	D&D&D&D	D&D&.&.&.&.&D&D	.&D&D&.&D&D&D&D
chr2	165344554	.	G	A	SMHC00929s000	NA	splice_acceptor_variant	HIGH	SCN2A	ENST00000636071.2:c.2563-1G>A													35	6.21972	2.3	0.999986	0.936			1	0.00145
chr2	166041464	.	C	T	SMHC00820s000	NA	missense_variant	MODERATE	SCN1A	ENST00000674923.1:c.2182G>A	ENSP00000501589.1:p.Glu728Lys	2660/11940	2182/6030	728/2009	E/K	Gaa/Aaa		deleterious(0)	probably_damaging(0.915)				28.2	4.15392	2.92					1	0.000138	D	.&.&.&M&.&.&M&.&.&.	D&D&D&D	.&.&.&D&.&.&D&.&D&D	.&.&.&D&D&.&D&D&D&.
chr2	167259304	.	GAAC	G	SMHC01663d000	NA	inframe_deletion	MODERATE	XIRP2	ENST00000672671.1:c.11459_11461del	ENSP00000499978.1:p.Gln3820del	11720-11722/12154	11456-11458/11514	3819-3820/3837	EQ/E	gAACaa/gaa									-3.09					0	0.976
chr2	171056496	.	T	C	SMHC00860s000	NA	missense_variant	MODERATE	TLK1	ENST00000360843.7:c.587A>G	ENSP00000354089.3:p.His196Arg	992/5726	587/2364	196/787	H/R	cAt/cGt		tolerated(0.17)	benign(0.108)				22.3	2.46246	5.21					1	0.0789	D	L&.&.&.&.	D&D&D&D&D	N&N&N&N&D	P&B&.&.&.
chr2	179047298	rs1303652656	AAAG	A	SMHC00839s000	NA	inframe_deletion	MODERATE	CCDC141	ENST00000443758.6:c.208_210del	ENSP00000390190.2:p.Leu71del	330-332/9131	208-210/4593	70/1530	L/-	CTT/-	rs1303652656						21.7	2.32429	-3.49					0
chr2	223895547	.	T	C	SMHC01879s000	NA	missense_variant	MODERATE	WDFY1	ENST00000233055.9:c.682A>G	ENSP00000233055.4:p.Ile228Val	733/4607	682/1233	228/410	I/V	Atc/Gtc	COSV104574584	tolerated(0.06)	possibly_damaging(0.847)				24.2	3.3444	2.35					0	0.689	D	N&.	D	N&N	P&.
chr2	231037933	rs997102983	G	A	SMHC01547s000	NA	missense_variant	MODERATE	C2orf72	ENST00000373640.5:c.368G>A	ENSP00000362743.4:p.Arg123His	411/3629	368/888	123/295	R/H	cGc/cAc	rs997102983	deleterious(0.02)	probably_damaging(0.941)	0.0003411	gnomAD_SAS		25.5	3.72847	2.1								L	N	N	D
chr2	231398545	rs1486563855	C	T	SMHC01654s000	NA	missense_variant	MODERATE	B3GNT7	ENST00000287590.6:c.826C>T	ENSP00000287590.5:p.Arg276Cys	920/3539	826/1206	276/401	R/C	Cgc/Tgc	rs1486563855	deleterious(0)	probably_damaging(1)				29.2	4.25355	2.25					0.62	0.354	D	H	D	D	D
chr3	391773	.	G	T	SMHC01873s000	NA	missense_variant	MODERATE	CHL1	ENST00000256509.7:c.2890G>T	ENSP00000256509.2:p.Gly964Cys	3365/7856	2890/3675	964/1224	G/C	Ggc/Tgc		deleterious(0)	probably_damaging(1)				28.2	4.14542	1.45					0	0.341	D	.&.&.	D&D	D&D&.	D&D&.
chr3	33373589	rs370195852	G	A	SMHC00860sfd0	NA	missense_variant	MODERATE	FBXL2	ENST00000484457.6:c.467G>A	ENSP00000417601.1:p.Arg156Gln	538/3827	467/1272	156/423	R/Q	cGa/cAa	rs370195852	tolerated(0.14)	possibly_damaging(0.464)	0.000227	AA		27	4.00053	3.58					0.22	0.725	D	N	D&D&D&D&D&D	N	P
chr3	35717357	rs748776109	G	A	SMHC00858s000	NA	missense_variant&splice_region_variant	MODERATE	ARPP21	ENST00000417925.5:c.893G>A	ENSP00000412326.1:p.Arg298Gln	1107/3086	893/2442	298/813	R/Q	cGg/cAg	rs748776109	tolerated(0.08)	probably_damaging(0.955)	0.0002029	gnomAD_AMR		36	6.40057	3.03	0.999988	0.986			0	0.354	D	M&.	D&D&D&D&D	D&D	D&D
chr3	41234221	.	T	G	SMHC00822d000	NA	missense_variant	MODERATE	CTNNB1	ENST00000645276.1:c.1613T>G	ENSP00000494654.1:p.Leu538Arg	1827/3127	1613/2352	538/783	L/R	cTa/cGa		deleterious(0)	probably_damaging(0.996)				32	4.52719	2.56					1	0.208	D	M&M&.&M&M&M&M&M&.&M&M&.&.&M&M&M&.&.&.&.&M&M&.&.&.&M&.&.&M&M&.&M&.&M&.&M&M&M&M&M&.	D&D&D&D&D	.&.&.&D&.&.&.&.&.&D&D&.&.&D&.&.&D&.&.&.&.&.&.&.&.&.&.&.&.&.&.&.&.&.&.&.&.&.&.&.&.	D&D&.&D&D&D&D&D&.&D&D&.&.&D&D&D&.&.&.&.&D&D&.&.&.&D&.&.&D&D&.&D&.&D&.&D&D&D&D&D&.
chr3	49655422	rs577534955	C	T	SMHC00891s000	NA	missense_variant	MODERATE	BSN	ENST00000296452.5:c.5866C>T	ENSP00000296452.4:p.Arg1956Trp	5992/15971	5866/11781	1956/3926	R/W	Cgg/Tgg	rs577534955&COSV56521507	deleterious(0)	possibly_damaging(0.874)	0.001	SAS		24.3	3.35923	1.21					1	0.126	N	M	D	D	D
chr3	52292819	rs769693391	G	A	SMHC01722s000	NA	missense_variant	MODERATE	GLYCTK	ENST00000436784.7:c.1265G>A	ENSP00000389175.2:p.Arg422Gln	1353/3791	1265/1572	422/523	R/Q	cGg/cAg	rs769693391&COSV59793374	deleterious(0)	probably_damaging(1)	8.837e-06	gnomAD_NFE		31	4.4276	3.31					0	0.81	D	H	D&D&D&D&D&D&D	D	D
chr3	54752626	rs751965381	C	T	SMHC02048s000	NA	stop_gained	HIGH	CACNA2D3	ENST00000474759.6:c.1195C>T	ENSP00000419101.1:p.Arg399Ter	1357/3789	1195/3276	399/1091	R/*	Cga/Tga	rs751965381			8.885e-06	gnomAD_NFE		38	7.45706	0.664					1		D	.&.&.&.&.	A&A&A&A	.&.&.&.&.	.&.&.&.&.
chr3	78685878	rs1170707330	G	A	SMHC02031s000	NA	stop_gained	HIGH	ROBO1	ENST00000464233.6:c.1210C>T	ENSP00000420321.1:p.Arg404Ter	1507/6927	1210/4956	404/1651	R/*	Cga/Tga	rs1170707330&COSV71392006			0	gnomAD_AFR&gnomAD_AMR&gnomAD_ASJ&gnomAD_EAS&gnomAD_FIN&gnomAD_NFE&gnomAD_OTH&gnomAD_SAS		37	7.26	-0.142					0	0.687	D	.&.&.&.&.&.	A&A&A&A	.&.&.&.&.&.	.&.&.&.&.&.
chr3	129828200	.	C	T	SMHC01890s000	NA	missense_variant	MODERATE	TMCC1	ENST00000393238.7:c.179G>A	ENSP00000376930.3:p.Arg60His	520/5992	179/1962	60/653	R/H	cGc/cAc		tolerated_low_confidence(0.08)	benign(0.412)				23.1	2.86554	0.493					0.21	0.453	D	M	D&D	N	D
chr3	179365161	rs908917337	C	T	SMHC01557sfd0	NA	missense_variant	MODERATE	MFN1	ENST00000471841.6:c.689C>T	ENSP00000420617.1:p.Pro230Leu	798/5212	689/2226	230/741	P/L	cCt/cTt	rs908917337	deleterious(0)	probably_damaging(0.913)				26.9	3.9938	2.29					0.02	0.237	D	H&H&.&.	D&D&D	D&D&D&D	D&D&.&.
chr3	184853915	.	G	A	SMHC01798s000	NA	missense_variant	MODERATE	VPS8	ENST00000287546.8:c.880G>A	ENSP00000287546.4:p.Glu294Lys	1051/5047	880/4287	294/1428	E/K	Gaa/Aaa		tolerated(0.07)	benign(0.413)				26.5	3.92688	2.4					0	0.909	D	.&.&.&L	D&D&D&D	N&N&N&.	.&D&D&.
chr3	197829661	.	G	GT	SMHC01861s000	NA	frameshift_variant	HIGH	LRCH3	ENST00000438796.6:c.879dup	ENSP00000399751.2:p.Gly294TrpfsTer5	919-920/7394	875-876/2412	292/803	G/GX	ggt/ggTt														0	0.842
chr4	1238211	.	G	A	SMHC01929s000	NA	missense_variant	MODERATE	CTBP1	ENST00000290921.10:c.167C>T	ENSP00000290921.6:p.Ala56Val	349/2297	167/1323	56/440	A/V	gCg/gTg		deleterious(0.03)	benign(0.249)				23	2.77621	2.08					0.98	0.0645	D	.&L&.&.&.&.&.	D&D&D	D&D&D&D&D&D&D	.&P&.&.&.&.&D
chr4	71534377	.	C	T	SMHC00834s000	NA	missense_variant	MODERATE	SLC4A4	ENST00000425175.5:c.2431C>T	ENSP00000393557.1:p.His811Tyr	2548/7596	2431/3285	811/1094	H/Y	Cat/Tat		tolerated(0.3)	probably_damaging(0.935)				23.2	2.90151	1.86					1	0.0198	D	L&L&L&L&.	D&D&D&D	.&D&D&D&D	D&D&.&P&D
chr4	76555612	rs758739144	G	A	SMHC01963sfd0	NA	missense_variant	MODERATE	SHROOM3	ENST00000296043.7:c.172G>A	ENSP00000296043.6:p.Glu58Lys	996/10891	172/5991	58/1996	E/K	Gaa/Aaa	rs758739144&COSV56029547	deleterious(0.05)	benign(0.2)	0.0007072	gnomAD_EAS		23.2	2.91845	0.833					0.73	0.425	N	M	D	D	P
chr4	113343015	.	AGGTG	A	SMHC00856s000	NA	splice_acceptor_variant&coding_sequence_variant	HIGH	ANK2	ENST00000672209.1:c.3961-1_3963del		?-4162/14932	?-3963/11988	?-1321/3995											4.11					1	0.363
chr4	118710178	.	G	A	SMHC01971sfs0	NA	missense_variant	MODERATE	METTL14	ENST00000388822.10:c.1247G>A	ENSP00000373474.3:p.Gly416Glu	1390/6642	1247/1371	416/456	G/E	gGa/gAa		tolerated_low_confidence(0.32)	probably_damaging(0.996)				24.7	3.5074	2.18					0.85		D	M	D&D	N	D
chr4	122304894	.	G	A	SMHC01980s000	NA	missense_variant	MODERATE	KIAA1109	ENST00000679879.1:c.9583G>A	ENSP00000505357.1:p.Ala3195Thr	9958/16162	9583/15282	3195/5093	A/T	Gct/Act		tolerated(0.26)	possibly_damaging(0.723)				22.6	2.57433	2.94					0	0.845	D	N&N	D&D&D	N&N	B&B
chr4	165299555	.	T	G	SMHC01643s000	NA	missense_variant	MODERATE	KLHL2	ENST00000514860.5:c.832T>G	ENSP00000424198.1:p.Tyr278Asp	1082/2442	832/1794	278/597	Y/D	Tac/Gac		deleterious(0)	possibly_damaging(0.703)				28.6	4.1939	2.27					1	0.304	D	M&.&.&.&.	D&D&D&D&D	D&D&D&D&D	D&.&.&.&.
chr4	184418187	.	CT	C	SMHC01698s000	NA	frameshift_variant	HIGH	IRF2	ENST00000393593.8:c.390del	ENSP00000377218.3:p.Asp131ThrfsTer21	568/2257	390/1050	130/349	E/X	gaA/ga									2					0.38	0.169
chr5	144870	rs142186656	C	T	SMHC01654s000	NA	missense_variant	MODERATE	PLEKHG4B	ENST00000637938.1:c.1855C>T	ENSP00000490806.1:p.Arg619Cys	1936/12612	1855/4884	619/1627	R/C	Cgc/Tgc	rs142186656	deleterious(0)	possibly_damaging(0.746)	0.000227	AA		21	2.21935	-0.295					0	0.609		.&M&.	N	.&D&D	.&D&.
chr5	10402420	rs1289102609	C	T	SMHC00819sfd1	NA	missense_variant	MODERATE	MARCHF6	ENST00000274140.10:c.1090C>T	ENSP00000274140.4:p.Arg364Cys	1294/9641	1090/2733	364/910	R/C	Cgc/Tgc	rs1289102609&COSV56878853	deleterious(0)	possibly_damaging(0.781)				32	4.75909	2.47							D	.&.&M&.	D&D&D&D	D&D&D&D	.&.&D&.
chr5	33649578	.	T	G	SMHC01971s000	NA	missense_variant	MODERATE	ADAMTS12	ENST00000504830.6:c.1310A>C	ENSP00000422554.1:p.Glu437Ala	1444/8572	1310/4785	437/1594	E/A	gAg/gCg		deleterious(0)	benign(0.001)				23.3	2.96657	-1.26					0	0.867	D	N&N	D&D	N&N	B&B
chr5	45267181	.	A	G	SMHC00817s000	NA	missense_variant	MODERATE	HCN1	ENST00000303230.6:c.1691T>C	ENSP00000307342.4:p.Leu564Pro	1978/9933	1691/2673	564/890	L/P	cTt/cCt	COSV57513756&COSV57533764	deleterious(0)	probably_damaging(0.999)				28.2	4.14701	2.53					0.95	0.111	D	H	D	D	D
chr5	93585042	.	AGCTGGCGAGATCCGCAGGACGAC	A	SMHC01763d000	NA	frameshift_variant	HIGH	NR2F1	ENST00000327111.8:c.21_43del	ENSP00000325819.3:p.Trp8GlyfsTer381	1822-1844/3843	20-42/1272	7-14/423	SWRDPQDD/X	aGCTGGCGAGATCCGCAGGACGAC/a									-4.98
chr5	118928706	.	C	G	NA	SMHC00831dfs0	missense_variant	MODERATE	DTWD2	ENST00000510708.6:c.428G>C	ENSP00000425048.1:p.Cys143Ser	464/5776	428/897	143/298	C/S	tGc/tCc		deleterious(0)	possibly_damaging(0.523)				24.7	3.48211	1.18					0	0.287	D	.&L	D&D&D	D&D	.&P
chr5	156949683	.	G	T	SMHC01820d000	NA	missense_variant	MODERATE	TIMD4	ENST00000274532.7:c.728C>A	ENSP00000274532.2:p.Thr243Asn	756/1330	728/1137	243/378	T/N	aCt/aAt		deleterious(0.01)	possibly_damaging(0.879)				20.3	2.12822	1.77					0	0.931	N	L&L	N&N	N&N	D&.
chr5	177204146	.	T	C	SMHC02016s000	NA	missense_variant	MODERATE	NSD1	ENST00000439151.7:c.1090T>C	ENSP00000395929.2:p.Tyr364His	1287/13042	1090/8091	364/2696	Y/H	Tac/Cac		deleterious(0)	probably_damaging(0.999)				28.8	4.21102	3.89					1	0.00186	D	.&.&.&M&.	D&D&D&D	D&N&D&N&N	.&D&.&D&D
chr6	33432197	rs1131691979	CA	C	SMHC01629s000	NA	frameshift_variant	HIGH	SYNGAP1	ENST00000646630.1:c.333del	ENSP00000496007.1:p.Lys114SerfsTer20	533/6015	333/4032	111/1343	P/X	ccA/cc	rs1131691979&CD1414850					pathogenic			-1.04			25418537	0.7	1
chr6	36425932	.	CT	C	SMHC01542s000	NA	frameshift_variant	HIGH	PXT1	ENST00000454782.3:c.150del	ENSP00000419944.1:p.Ala51ProfsTer28	599/2073	150/405	50/134	P/X	ccA/cc									-1.5					0	0.611
chr6	46692789	.	C	G	SMHC02027s000	NA	missense_variant	MODERATE	TDRD6	ENST00000316081.11:c.4661C>G	ENSP00000346065.5:p.Ala1554Gly	4905/8967	4661/6291	1554/2096	A/G	gCt/gGt		deleterious(0)	probably_damaging(0.909)				23.4	3.00585	0.604					0	0.991	N	M&M	D&D	N&N	.&D
chr6	70232738	rs375684014	C	T	SMHC01653s000	NA	missense_variant	MODERATE	COL9A1	ENST00000357250.11:c.2348G>A	ENSP00000349790.6:p.Arg783His	2508/3697	2348/2766	783/921	R/H	cGt/cAt	rs375684014	deleterious(0.03)	probably_damaging(0.998)	0.0001637	gnomAD_SAS	uncertain_significance	27.4	4.0544	3.01					0	0.0671	D	M&.	D&D&D	D&D	D&D
chr6	87284503	.	C	T	SMHC02030s000	NA	missense_variant	MODERATE	GJB7	ENST00000525899.6:c.410G>A	ENSP00000435355.1:p.Gly137Asp	756/2279	410/672	137/223	G/D	gGc/gAc		tolerated(0.1)	possibly_damaging(0.821)				19.37	2.0148	-0.082					0	0.389	U	M&.	D&D	D&D	D&.
chr6	89727889	rs748372187	G	A	SMHC01580d000	NA	missense_variant	MODERATE	MDN1	ENST00000369393.8:c.5416C>T	ENSP00000358400.3:p.Arg1806Cys	5603/18485	5416/16791	1806/5596	R/C	Cgt/Tgt	rs748372187&COSV101021275	tolerated(0.05)	benign(0.428)	0.0005227	gnomAD_SAS		23	2.78019	0.234					1	0.695	N	M&M	D&D	D&.	P&P
chr6	111307546	.	G	A	SMHC01708s000	NA	stop_gained	HIGH	REV3L	ENST00000358835.7:c.9067C>T	ENSP00000351697.3:p.Arg3023Ter	9525/10815	9067/9393	3023/3130	R/*	Cga/Tga	COSV62618360&COSV62618648						38	7.47743	-0.121					1	0.218	N	.&.&.&.	A&A&A&A	.&.&.&.	.&.&.&.
chr6	146728584	rs569688854	G	A	SMHC01673s000	NA	missense_variant	MODERATE	ADGB	ENST00000397944.8:c.2363G>A	ENSP00000381036.3:p.Arg788Gln	2432/5318	2363/5004	788/1667	R/Q	cGa/cAa	rs569688854&COSV58857656&COSV58861003	deleterious(0.03)	benign(0.312)	0.001	EAS		23.8	3.16995	2.41								M	N	D	D
chr6	160063448	rs763188815	G	A	NA	SMHC01998s000	missense_variant	MODERATE	IGF2R	ENST00000356956.6:c.3704G>A	ENSP00000349437.1:p.Gly1235Asp	3869/14061	3704/7476	1235/2491	G/D	gGc/gAc	rs763188815&COSV100807384	tolerated(0.06)	possibly_damaging(0.534)	0.000392	gnomAD_SAS		24.1	3.2935	2.37					1	0.339	D	.&.	D	D&.	P&P
chr6	161098282	rs760673383	C	T	SMHC01773s000	NA	missense_variant	MODERATE	MAP3K4	ENST00000392142.9:c.3529C>T	ENSP00000375986.4:p.Arg1177Trp	3692/5500	3529/4827	1177/1608	R/W	Cgg/Tgg	rs760673383&COSV62335426	deleterious(0)	possibly_damaging(0.893)	9.112e-06	gnomAD_NFE		25.1	3.62615	2.21					1	0.579	D	L&.	D&D&D&D	N&N	D&D
chr7	1471570	rs112314352	C	A	SMHC00817s000	NA	splice_donor_variant	HIGH	INTS1	ENST00000404767.8:c.6255+1G>T							rs112314352			5.568e-05	gnomAD_EAS		33	4.7672	1.96	0.999964	0.918			0.22	0.589
chr7	3969365	rs1320319694	C	T	SMHC01973s000	NA	missense_variant	MODERATE	SDK1	ENST00000404826.7:c.1655C>T	ENSP00000385899.2:p.Thr552Ile	1990/10593	1655/6642	552/2213	T/I	aCc/aTc	rs1320319694	deleterious(0.04)	possibly_damaging(0.828)	3.354e-05	gnomAD_SAS		24.4	3.40939	1.89					0.01	0.433	D	L&.&.	D&D	D&D&.	D&.&.
chr7	40062827	rs1472729808	C	T	SMHC01750s000	NA	missense_variant&splice_region_variant	MODERATE	CDK13	ENST00000181839.10:c.2602C>T	ENSP00000181839.4:p.Arg868Trp	2988/9525	2602/4539	868/1512	R/W	Cgg/Tgg	rs1472729808&COSV51706182	deleterious(0)	probably_damaging(1)	0.0001639	gnomAD_OTH		33	5.26239	4.11	0.983995	0.898			0.75	0.569		M&M&.&.&.&.&.	D&D	D&D&.&.&.&.&.	D&D&D&.&.&.&.
chr7	43788022	rs387906596	C	T	SMHC01543s000	NA	missense_variant	MODERATE	BLVRA	ENST00000402924.5:c.131C>T	ENSP00000385757.1:p.Ser44Leu	294/1161	131/891	44/296	S/L	tCg/tTg	rs387906596&CM112102&COSV55512431	deleterious(0)	possibly_damaging(0.871)				25.7	3.76061	2.88				0.7	0.08	0.632	D	M&M&.	D&D	D&D&D	D&D&.
chr7	56015022	.	C	T	NA	SMHC01824s000	splice_donor_variant	HIGH	PSPH	ENST00000395471.7:c.570+1G>A													34	5.5802	4.64	0.999977	0.916			0.71	0.282
chr7	74689153	.	C	T	SMHC01933s000	NA	missense_variant	MODERATE	GTF2I	ENST00000650807.1:c.508C>T	ENSP00000499094.1:p.Leu170Phe	596/4730	508/3480	170/1159	L/F	Ctc/Ttc	COSV60404081	deleterious(0.01)	possibly_damaging(0.751)				15.98	1.53871	4.22					1		N	L&L&L&L&L&.	N&N&N&N&N	.&.&.&.&N&N	B&B&B&P&.&.
chr7	100114072	.	G	GCGGT	SMHC00811s000	NA	frameshift_variant	HIGH	TAF6	ENST00000472509.5:c.305_308dup	ENSP00000419760.1:p.Ile104ProfsTer25	486-487/2551	308-309/2205	103/734	R/RPX	cgc/cgACCGc														0	0.827
chr7	100433514	.	C	G	SMHC01562s000	NA	missense_variant	MODERATE	MEPCE	ENST00000310512.4:c.2030C>G	ENSP00000308546.2:p.Pro677Arg	2218/2822	2030/2070	677/689	P/R	cCt/cGt	COSV52769209	deleterious(0)	possibly_damaging(0.653)				25.7	3.77132	4.04					1		D	.&M	D&D&D	D&D	.&P
chr7	102227628	.	TA	T	SMHC01556s000	NA	frameshift_variant	HIGH	CUX1	ENST00000360264.7:c.3427del	ENSP00000353401.3:p.Thr1143ProfsTer4	3446/13762	3426/4551	1142/1516	I/X	atA/at									-8.17					1	0.407
chr7	102877565	rs368775610	G	A	SMHC01971s000	NA	stop_gained	HIGH	FBXL13	ENST00000313221.8:c.1537C>T	ENSP00000321927.4:p.Arg513Ter	1964/2744	1537/2208	513/735	R/*	Cga/Tga	rs368775610&COSV57537047			0.002901	gnomAD_ASJ		37	7.11098						0	0.995	D	.&.&.&.&.	A&A&A&A&A&A&D&D	.&.&.&.&.	.&.&.&.&.
chr7	106012996	rs1225109526	T	G	SMHC01992s000	NA	missense_variant	MODERATE	CDHR3	ENST00000317716.14:c.1189T>G	ENSP00000325954.9:p.Phe397Val	1244/6448	1189/2658	397/885	F/V	Ttt/Gtt	rs1225109526	deleterious(0.02)	possibly_damaging(0.536)	5.615e-05	gnomAD_EAS		23.8	3.15821	4.44					0	0.957	D	M&.&.	D&N&N&N&N	D&D&D	D&.&.
chr7	107926316	rs1240154537	G	A	SMHC00847s000	NA	missense_variant	MODERATE	LAMB1	ENST00000222399.11:c.4931C>T	ENSP00000222399.6:p.Ala1644Val	5068/5650	4931/5361	1644/1786	A/V	gCg/gTg	rs1240154537	tolerated(0.15)	benign(0.153)	2.646e-05	gnomAD_NFE		22.8	2.66052	2.66					0	0.631		.&M	D&D&D	N&N	D&P
chr7	127584369	rs773693668	G	A	SMHC00894s000	NA	stop_gained	HIGH	GCC1	ENST00000321407.3:c.814C>T	ENSP00000318821.2:p.Arg272Ter	1228/4128	814/2328	272/775	R/*	Cga/Tga	rs773693668			8.802e-06	gnomAD_NFE		35	6.26894	-0.477					0	0.759	D		A
chr8	27756729	.	C	T	SMHC02010s000	NA	missense_variant	MODERATE	CCDC25	ENST00000356537.9:c.158G>A	ENSP00000348933.4:p.Arg53Gln	258/3627	158/627	53/208	R/Q	cGa/cAa	COSV62958854	deleterious(0.02)	probably_damaging(0.961)				29.8	4.32954	2.44					0.05	0.498	D	M&.	D&D&D	D&.	D&.
chr8	31111792	.	A	C	SMHC01910s000	NA	missense_variant	MODERATE	WRN	ENST00000298139.7:c.2266A>C	ENSP00000298139.5:p.Lys756Gln	2506/7575	2266/4299	756/1432	K/Q	Aaa/Caa		deleterious(0.01)	possibly_damaging(0.494)				22.8	2.67691	1.96					0	0.988	N	L	N	N	P
chr8	94765204	.	T	C	SMHC01561s000	NA	missense_variant	MODERATE	DPY19L4	ENST00000414645.6:c.892T>C	ENSP00000389630.2:p.Tyr298His	991/6197	892/2172	298/723	Y/H	Tac/Cac		tolerated(0.43)	probably_damaging(0.998)				24	3.26917						0	0.98	D	M	D	N	D
chr8	122952190	.	C	G	SMHC00838s000	NA	missense_variant	MODERATE	ZHX2	ENST00000314393.6:c.680C>G	ENSP00000314709.4:p.Ser227Trp	1254/4361	680/2514	227/837	S/W	tCg/tGg	COSV58710651	deleterious(0.01)	possibly_damaging(0.663)				24.6	3.45898	4.17					0.41	0.0883	N	M	D	D	D
chr8	142518160	rs907409278	C	T	SMHC01758s000	NA	missense_variant	MODERATE	ADGRB1	ENST00000517894.5:c.2840C>T	ENSP00000430945.1:p.Pro947Leu	3734/6241	2840/4755	947/1584	P/L	cCg/cTg	rs907409278	deleterious(0.02)	probably_damaging(0.948)	3.268e-05	gnomAD_SAS		24.1	3.31062	1.36							U	.&.&.	D&D	.&D&D	.&.&.
chr8	143805393	rs782729497	C	T	SMHC00818s000	NA	missense_variant	MODERATE	SCRIB	ENST00000674084.1:c.2389G>A	ENSP00000501177.1:p.Val797Met	2396/5227	2389/4977	797/1658	V/M	Gtg/Atg	rs782729497	deleterious(0)	probably_damaging(0.999)	4.354e-05	gnomAD_SAS		26	3.82754	1.64					0.91			.&.&.&.	D&D&D	N&N&N&D	.&.&.&.
chr8	144115846	rs1017512437	C	T	SMHC01545s000	NA	missense_variant	MODERATE	WDR97	ENST00000323662.9:c.4583C>T	ENSP00000320648.8:p.Pro1528Leu	4595/6916	4583/4869	1528/1622	P/L	cCg/cTg	rs1017512437	deleterious_low_confidence(0)	possibly_damaging(0.706)	4.738e-05	gnomAD_SAS		21.6	2.31095	0.531									N	N	D
chr9	70318794	.	G	T	SMHC01963s000	NA	stop_gained&splice_region_variant	HIGH	SMC5	ENST00000361138.7:c.1981G>T	ENSP00000354957.5:p.Glu661Ter	2082/5949	1981/3306	661/1101	E/*	Gaa/Taa							45	8.79251	2.47	0.999953	0.996			0.98	0.689	N		A
chr9	70387921	.	TG	T	SMHC02027s000	NA	frameshift_variant	HIGH	KLF9	ENST00000377126.3:c.589del	ENSP00000366330.2:p.His197ThrfsTer17	1850/5175	589/735	197/244	H/X	Cac/ac									2.4					0.88
chr9	74671791	.	C	T	SMHC01846d000	NA	stop_gained&splice_region_variant	HIGH	RORB	ENST00000396204.2:c.1147C>T	ENSP00000379507.2:p.Arg383Ter	1147/2996	1147/1413	383/470	R/*	Cga/Tga	COSV100974438&COSV65338270						38	7.62796	3.21					1		D	.&.	A&A	.&.	.&.
chr9	87646537	rs772431146	C	G	SMHC00860s000	NA	missense_variant	MODERATE	DAPK1	ENST00000408954.8:c.1208C>G	ENSP00000386135.3:p.Ser403Trp	1557/5912	1208/4293	403/1430	S/W	tCg/tGg	rs772431146&COSV63788568&COSV63788808	deleterious(0)	possibly_damaging(0.516)				26.3	3.88761	1.28					1	0.291	N	L&L&L&L&L&L	D&D&D&D&D	N&N&N&N&.&N	P&P&.&P&P&.
chr9	98220935	.	C	G	SMHC00844d000	NA	missense_variant	MODERATE	TBC1D2	ENST00000465784.7:c.1272G>C	ENSP00000481721.1:p.Lys424Asn	1380/3265	1272/2787	424/928	K/N	aaG/aaC		deleterious(0.01)	possibly_damaging(0.63)				23.8	3.15532	0.115					0	0.886	D	M&M&.&M	D&D&D	.&N&N&N	D&.&.&D
chr9	125360567	.	G	C	SMHC01571s000	NA	missense_variant	MODERATE	GAPVD1	ENST00000394105.6:c.4165G>C	ENSP00000377665.2:p.Glu1389Gln	4325/5207	4165/4464	1389/1487	E/Q	Gaa/Caa		deleterious(0.04)	possibly_damaging(0.839)				28.8	4.21699	2.99					1	0.0361	D	.&.&.&M&.&M&.	D&D&D&D&D&D&D&D	N&N&N&N&N&N&N	P&P&.&B&P&B&P
chr10	34384249	.	A	T	SMHC02047s000	NA	missense_variant	MODERATE	PARD3	ENST00000374789.8:c.896T>A	ENSP00000363921.3:p.Leu299Gln	1197/5980	896/4071	299/1356	L/Q	cTg/cAg		tolerated(0.12)	benign(0.027)				22.9	2.7328	3.77					0.94	0.683	D	.&L&L&L&L&.&L&.&L&L&.&.	D&D&D&D&D&D&D&D&D&D&D&D	D&D&D&D&D&D&D&D&D&D&D&D	D&.&B&B&B&B&B&B&P&B&D&.
chr10	67884864	rs568432780	C	T	NA	SMHC00844d000	missense_variant	MODERATE	SIRT1	ENST00000212015.11:c.143C>T	ENSP00000212015.6:p.Pro48Leu	209/4107	143/2244	48/747	P/L	cCg/cTg	rs568432780	deleterious_low_confidence(0.01)	benign(0)	0.001	EAS		22.8	2.69275	-0.238					0.95	0.571	N	L	D	N	B
chr10	86716360	.	C	T	NA	SMHC01587s000	missense_variant	MODERATE	LDB3	ENST00000623056.4:c.1280C>T	ENSP00000485500.1:p.Ala427Val	1365/2309	1280/2199	427/732	A/V	gCc/gTc		tolerated(0.07)	benign(0.038)				19.25	1.99908	1.73					0	0.0734		.&.&L&.	D&N&N&N&N&N	N&.&N&N	.&.&D&B
chr10	87933147	rs121909224	C	T	SMHC00996s000	NA	stop_gained	HIGH	PTEN	ENST00000371953.8:c.388C>T	ENSP00000361021.3:p.Arg130Ter	1233/8515	388/1212	130/403	R/*	Cga/Tga	rs121909224&CM094223&CM971273&COSV64288384&COSV64288463&COSV64297940&COSV64311187			3.266e-05	gnomAD_SAS	pathogenic&likely_pathogenic	36	6.85884	3.75			10749983&11274365&25157968&26961773&26619011&&10772390&10923032&21194675&21956414&22266152&23335809&23470840&9259288&22381246&23764071&23934601&24345843&21824802&11504908&18767981&20085938&10848731&10866302&16773562&21828076&27535533&28655553&29706350&9467011&9856571	0.01&0.70&0.70&0.01&0.70&0.70&0.71&0.71&0.71&0.71&0.71&0.71&0.71&0.71&0.70&0.70&0.70&0.70&0.70&0.70&0.70&0.70&0.70&0.70&0.70&0.70&0.70&0.70&0.70&0.70&0.70	0.98	0.0929	D		A
chr10	102376692	rs778301038	G	A	SMHC02030s000	NA	missense_variant	MODERATE	GBF1	ENST00000673650.1:c.4276G>A	ENSP00000501233.1:p.Val1426Met	4536/6502	4276/5679	1426/1892	V/M	Gtg/Atg	rs778301038	deleterious(0.02)	probably_damaging(0.986)	6.168e-05	gnomAD_AFR		26.8	3.97899	2.22					0	0.723	D	M	D	N	D
chr10	126036189	.	G	C	NA	SMHC00825s000	missense_variant	MODERATE	ADAM12	ENST00000368679.8:c.2495C>G	ENSP00000357668.4:p.Pro832Arg	2805/7938	2495/2730	832/909	P/R	cCt/cGt		deleterious(0)	benign(0.442)				24.2	3.34492	2.94					0.34	0.32	D	M	D	D	D
chr11	8640534	rs1409485317	G	A	SMHC01654s000	NA	missense_variant	MODERATE	TRIM66	ENST00000646038.1:c.1841C>T	ENSP00000495413.1:p.Pro614Leu	2446/10688	1841/4179	614/1392	P/L	cCt/cTt	rs1409485317	deleterious(0.04)	probably_damaging(0.947)	9.441e-05	gnomAD_EAS		21.9	2.36064	1.16								N&.&.	N&N	N&N&.	B&.&.
chr11	44600231	rs1444820250	G	A	SMHC02008s000	NA	splice_donor_variant	HIGH	CD82	ENST00000227155.9:c.136+1G>A							rs1444820250			8.801e-06	gnomAD_NFE		34	5.61088	1.94	0.999989	0.952			0	0.386
chr11	46873194	rs757039930	C	T	SMHC01910s000	NA	missense_variant	MODERATE	LRP4	ENST00000378623.6:c.4489G>A	ENSP00000367888.1:p.Glu1497Lys	4660/8155	4489/5718	1497/1905	E/K	Gaa/Aaa	rs757039930	deleterious(0)	probably_damaging(0.995)	1.759e-05	gnomAD_NFE		27.6	4.08322	2.29					0.1	0.0317	D	M	D	D	D
chr11	47422676	.	A	G	SMHC01651d000	NA	missense_variant	MODERATE	PSMC3	ENST00000619920.4:c.782T>C	ENSP00000481029.1:p.Ile261Thr	976/1580	782/1320	261/439	I/T	aTt/aCt		deleterious(0.03)	probably_damaging(0.999)				28.1	4.13638	3.64					0.98	0.115	D	.&L&L&.&.&.&.	D&D	.&D&.&D&.&.&.	.&D&D&D&.&.&.
chr11	61131820	rs761193749	C	CT	SMHC00812s000,SMHC01550s000	NA	frameshift_variant&stop_retained_variant	HIGH	VPS37C	ENST00000301765.10:c.1067dup	ENSP00000301765.5:p.Ter356%3D	1109-1110/2673	1067-1068/1068	356/355	*	tag/taAg	rs761193749			0.001328	gnomAD_EAS		25.8	3.79062						0.2	0.371
chr11	65275980	.	C	A	SMHC01833d000	NA	missense_variant	MODERATE	POLA2	ENST00000265465.8:c.443C>A	ENSP00000265465.3:p.Pro148Gln	774/3544	443/1797	148/598	P/Q	cCg/cAg		deleterious(0)	probably_damaging(0.998)				25.5	3.72214	2.15					0	0.705	D	M&.	D&D	D&D	D&D
chr12	7142946	rs767861489	C	T	SMHC01812s000	NA	missense_variant	MODERATE	CLSTN3	ENST00000266546.11:c.1618C>T	ENSP00000266546.6:p.Arg540Cys	1896/4013	1618/2871	540/956	R/C	Cgc/Tgc	rs767861489	deleterious(0)	probably_damaging(0.959)	9.921e-05	gnomAD_ASJ		28.3	4.16036	0.721					1	0.364	D	L	D&D	D	D
chr12	13615566	.	T	C	SMHC01859s000	NA	missense_variant	MODERATE	GRIN2B	ENST00000609686.4:c.1427A>G	ENSP00000477455.1:p.Tyr476Cys	2135/30609	1427/4455	476/1484	Y/C	tAt/tGt		deleterious(0)	probably_damaging(1)				29.6	4.30258	2.32					1	0.169	D	H	D		D
chr12	54573459	rs1259468203	A	G	SMHC01637s000	NA	missense_variant	MODERATE	PDE1B	ENST00000243052.8:c.941A>G	ENSP00000243052.3:p.Asn314Ser	1126/3193	941/1611	314/536	N/S	aAc/aGc	rs1259468203	deleterious(0.03)	probably_damaging(0.999)				25.5	3.72741	2.26					0.95	0.394	D	M&.&.	D&D&D	D&D&D	D&.&D
chr12	67305264	.	T	A	SMHC01954s000	NA	missense_variant	MODERATE	CAND1	ENST00000545606.6:c.1596T>A	ENSP00000442318.1:p.Phe532Leu	1956/11176	1596/3693	532/1230	F/L	ttT/ttA		tolerated(0.05)	probably_damaging(0.997)				24.4	3.41225	2.26					1	0.0165	D	M	D&D	D	D
chr12	77966280	rs761714126	G	A	SMHC01992s000	NA	missense_variant	MODERATE	NAV3	ENST00000397909.7:c.466G>A	ENSP00000381007.2:p.Val156Ile	1034/10219	466/7158	156/2385	V/I	Gtt/Att	rs761714126	tolerated(1)	possibly_damaging(0.526)	3.275e-05	gnomAD_SAS		22.8	2.66372	2.66					1	0.228	U	.&.&N&N	D&D&D&D	.&N&N&N	.&.&D&P
chr12	107618249	.	G	A	SMHC01992s000	NA	missense_variant	MODERATE	BTBD11	ENST00000280758.10:c.2323G>A	ENSP00000280758.5:p.Ala775Thr	2830/5746	2323/3315	775/1104	A/T	Gcg/Acg		tolerated(0.15)	benign(0.169)				22	2.38409	2.53					0.99	0.338	N	N&N&.	D&D&D&N	N&N&N	P&P&.
chr13	20058663	.	C	CT	SMHC01629s000	NA	frameshift_variant	HIGH	ZMYM2	ENST00000382874.6:c.2584dup	ENSP00000372327.2:p.Tyr862LeufsTer3	2772-2773/10139	2582-2583/4134	861/1377	T/TX	act/acTt														0.97	0.773
chr13	33835162	rs751166752	G	A	SMHC01701s000	NA	missense_variant	MODERATE	RFC3	ENST00000380071.8:c.824G>A	ENSP00000369411.3:p.Arg275His	854/2306	824/1071	275/356	R/H	cGt/cAt	rs751166752&COSV66296985	deleterious(0)	probably_damaging(1)	8.851e-06	gnomAD_NFE		31	4.3725	1.74					0	0.862	D	H&H&.	D&D	D&D&.	D&.&.
chr13	41323182	.	A	G	SMHC01648sfs0	NA	missense_variant	MODERATE	NAA16	ENST00000379406.8:c.529A>G	ENSP00000368716.3:p.Thr177Ala	791/4285	529/2595	177/864	T/A	Act/Gct	COSV65064127	deleterious(0.01)	possibly_damaging(0.546)				25.4	3.69245	3					0	0.969	D	M&M	D&D&D	D&D	P&P
chr13	98915375	.	G	T	SMHC01584s000	NA	missense_variant	MODERATE	DOCK9	ENST00000442173.5:c.846C>A	ENSP00000406883.2:p.Asn282Lys	1021/7643	846/6306	282/2101	N/K	aaC/aaA		deleterious(0.01)	possibly_damaging(0.469)				24.6	3.46041	-2.46					1		D	.&.&.&.&.	D&D&D	D&N&D&.&.	.&P&.&.&.
chr13	112068419	.	T	G	SMHC01716s000	NA	missense_variant	MODERATE	SOX1	ENST00000330949.3:c.761T>G	ENSP00000330218.1:p.Leu254Arg	1271/4558	761/1176	254/391	L/R	cTg/cGg		deleterious(0)	probably_damaging(0.99)				26	3.83008	2.14							U	M	D	D	D
chr13	114018111	rs1053645877	G	A	SMHC00924s000	NA	missense_variant	MODERATE	RASA3	ENST00000334062.8:c.1084C>T	ENSP00000335029.7:p.Arg362Trp	1218/4203	1084/2505	362/834	R/W	Cgg/Tgg	rs1053645877	deleterious(0.01)	possibly_damaging(0.773)	0.0001239	gnomAD_AMR		22.5	2.5482	-1.33					0	0.191	D	M	D&D&D	D	D
chr14	92652218	rs149740709	G	A	SMHC01813d000	NA	missense_variant	MODERATE	RIN3	ENST00000216487.12:c.1169G>A	ENSP00000216487.7:p.Arg390His	1321/3852	1169/2958	390/985	R/H	cGc/cAc	rs149740709&COSV99378625	deleterious(0.05)	probably_damaging(0.987)	0.0006678	gnomAD_OTH		22.2	2.42814	0.262					0	0.446	N	M&.	N	N&.	D&.
chr15	23646389	rs761743170	G	A	NA	SMHC00842s000	missense_variant	MODERATE	MAGEL2	ENST00000650528.1:c.1354C>T	ENSP00000497810.1:p.Arg452Cys	1479/4319	1354/3750	452/1249	R/C	Cgc/Tgc	rs761743170	deleterious_low_confidence(0.02)	probably_damaging(0.994)				23.1	2.83965	-0.382					0.92			.&.		.&.	.&.
chr15	40464521	.	G	A	SMHC01815s000	NA	missense_variant	MODERATE	BAHD1	ENST00000416165.6:c.2026G>A	ENSP00000396976.1:p.Gly676Arg	2356/4779	2026/2343	676/780	G/R	Gga/Aga		deleterious(0.01)	probably_damaging(0.997)				32	4.44914	2.08					0.99	0.26	D	.&M&M	D&D&D	N&N&N	D&D&D
chr15	48456663	.	T	C	SMHC01707s000	NA	missense_variant	MODERATE	FBN1	ENST00000316623.10:c.5396A>G	ENSP00000325527.5:p.Tyr1799Cys	5712/11609	5396/8616	1799/2871	Y/C	tAt/tGt		deleterious(0)	probably_damaging(0.998)				30	4.34622	2.29					1	0.00289	D		D	D
chr15	54500874	rs746020902	G	A	SMHC01844d000	NA	missense_variant	MODERATE	UNC13C	ENST00000260323.15:c.5197G>A	ENSP00000260323.11:p.Val1733Met	5197/12946	5197/6645	1733/2214	V/M	Gtg/Atg	rs746020902&COSV52927980	deleterious_low_confidence(0)	benign(0.437)	0.0001659	gnomAD_OTH		24.8	3.51959	7.17					0	0.328	D	.&M	D&D&D	.&D	.&P
chr15	57625780	.	T	A	SMHC01707s000	NA	missense_variant&splice_region_variant	MODERATE	MYZAP	ENST00000267853.10:c.413T>A	ENSP00000267853.5:p.Val138Asp	544/2398	413/1401	138/466	V/D	gTt/gAt		deleterious(0)	benign(0.268)				27.4	4.05687	1.12	0.000265629	0.022			0		N	.&.&.&.&M&M&.	D&D&D&D&D&D&D&D&D	N&.&.&N&N&N&D	.&.&.&.&B&P&.
chr15	58933523	.	C	G	SMHC01999s000	NA	missense_variant	MODERATE	SLTM	ENST00000380516.7:c.43G>C	ENSP00000369887.2:p.Gly15Arg	157/4168	43/3105	15/1034	G/R	Ggt/Cgt		deleterious(0.01)	benign(0.151)				22	2.37782	-0.055					1	0.267	U	L&.&.&.&.&.	D&N	N&N&.&N&N&N	B&.&.&.&.&.
chr15	59652328	.	T	C	SMHC00828s000	NA	splice_acceptor_variant	HIGH	GTF2A2	ENST00000396060.7:c.-49-2A>G													33	5.31895	2.64	0.999987	0.94			0.39	0.603
chr15	92978328	.	C	A	SMHC01912s000	NA	missense_variant	MODERATE	CHD2	ENST00000394196.9:c.2672C>A	ENSP00000377747.4:p.Pro891His	3244/9350	2672/5487	891/1828	P/H	cCc/cAc		deleterious(0)	probably_damaging(1)				26.6	3.94175	2.28					1	0.0861	U	H&H&.	D&D	.&D&.	D&D&.
chr16	2151909	.	G	A	SMHC01798s000	NA	splice_donor_variant	HIGH	RAB26	ENST00000210187.11:c.468+1G>A													35	5.94101	3.02	0.999978	0.938			0	0.589
chr16	2176106	rs1205584876	G	A	SMHC01744s000	NA	missense_variant	MODERATE	TRAF7	ENST00000326181.11:c.1804G>A	ENSP00000318944.6:p.Val602Met	1919/3683	1804/2013	602/670	V/M	Gtg/Atg	rs1205584876	deleterious(0)	probably_damaging(0.996)	0	gnomAD_AFR&gnomAD_AMR&gnomAD_ASJ&gnomAD_EAS&gnomAD_FIN&gnomAD_NFE&gnomAD_OTH&gnomAD_SAS		25.5	3.73373	3.25					0.46	0.468	D	M	D	D	D
chr16	2756551	.	A	T	SMHC01752s000	NA	stop_gained	HIGH	SRRM2	ENST00000301740.13:c.187A>T	ENSP00000301740.8:p.Lys63Ter	427/9044	187/8259	63/2752	K/*	Aag/Tag							37	7.27387	3.61						0.174	N	.&.&.	A	.&.&.	.&.&.
chr16	11730669	.	T	A	SMHC00847s000	NA	missense_variant	MODERATE	TXNDC11	ENST00000356957.7:c.675A>T	ENSP00000349439.3:p.Leu225Phe	783/3178	675/2958	225/985	L/F	ttA/ttT		deleterious(0.01)	probably_damaging(0.942)				23.9	3.21448	0.402					0	0.63	D	M&M	D&D	D&D	D&D
chr16	28538829	.	A	AT	SMHC01582s000	NA	frameshift_variant	HIGH	NUPR1	ENST00000395641.2:c.78dup	ENSP00000379003.2:p.Ser27IlefsTer2	179-180/550	78-79/303	26-27/100	-/X	-/A														0.01	0.433
chr16	30712295	rs267604511	C	T	SMHC01549s000	NA	stop_gained	HIGH	SRCAP	ENST00000262518.9:c.1849C>T	ENSP00000262518.4:p.Gln617Ter	2204/11724	1849/9693	617/3230	Q/*	Cag/Tag	rs267604511						35	6.17178	3.69					1	0.00579	D	.&.	A&A&A	.&.	.&.
chr16	51140210	.	T	C	SMHC00811s000	NA	missense_variant	MODERATE	SALL1	ENST00000251020.9:c.2012A>G	ENSP00000251020.4:p.Lys671Arg	2041/5134	2012/3975	671/1324	K/R	aAg/aGg		deleterious(0.01)	probably_damaging(0.985)				26.9	3.98745	2.64					0.99	0.048	D	.&M&.	D&D&D&D	N&N&N	.&D&.		chrX:49663751
chr16	53267414	rs764673104	C	T	SMHC01850s000	NA	missense_variant	MODERATE	CHD9	ENST00000447540.5:c.4441C>T	ENSP00000396345.2:p.Arg1481Trp	4650/11509	4441/8694	1481/2897	R/W	Cgg/Tgg	rs764673104&COSV54615592	deleterious(0)	probably_damaging(0.948)	5.58e-05	gnomAD_EAS		26.3	3.8925	0.504					1	0.0877	D	M&M&M&M&.	D&D&D&D	D&D&D&D&D	D&D&D&D&.
chr16	58509311	.	T	C	SMHC01637s000	NA	missense_variant	MODERATE	NDRG4	ENST00000394282.8:c.980T>C	ENSP00000377823.4:p.Leu327Pro	1387/3626	980/1176	327/391	L/P	cTg/cCg		deleterious(0.05)	possibly_damaging(0.692)				29	4.24116	2.54					0.02	0.787	D	.&.&.&M&.&.&.&.&.&M	D&D&D&D&D&D&D&D&D&D	D&D&D&D&D&D&D&D&D&D	D&D&D&P&.&.&.&B&.&D
chr16	66925125	.	C	A	NA	SMHC02016s000	stop_gained	HIGH	RRAD	ENST00000420652.5:c.55G>T	ENSP00000388744.1:p.Glu19Ter	207/1476	55/927	19/308	E/*	Gag/Tag							36	6.96859	2.23					0.31	0.278	N	.&.	A&A	.&.	.&.
chr16	67611443	rs1555534147	CAAAG	C	SMHC02088d000	NA	frameshift_variant	HIGH	CTCF	ENST00000646076.1:c.615_618del	ENSP00000494538.1:p.Lys206ProfsTer15	1113-1116/3989	612-615/2184	204-205/727	TK/X	acAAAG/ac	rs1555534147					pathogenic			3.09			18654629&19563753&22354838&23746550&28135719&28619046	0.70&0.70&0.70&0.70&0.70&0.70	1	0.033
chr16	70832969	.	T	C	SMHC02032s000	NA	missense_variant	MODERATE	HYDIN	ENST00000393567.7:c.13778A>G	ENSP00000377197.2:p.Tyr4593Cys	13962/21046	13778/15366	4593/5121	Y/C	tAc/tGc		deleterious(0)	probably_damaging(0.971)				24.6	3.45412	1.05							U	M	D&D	D			chr1:146541435
chr16	87726776	.	AG	A	SMHC01859s000	NA	frameshift_variant	HIGH	KLHDC4	ENST00000270583.10:c.747del	ENSP00000270583.4:p.Tyr250ThrfsTer22	843/1924	747/1563	249/520	G/X	ggC/gg	COSV99566438								1.28					0	0.957
chr16	88810428	rs780098835	C	T	SMHC01554s000	NA	missense_variant	MODERATE	APRT	ENST00000378364.8:c.316G>A	ENSP00000367615.3:p.Gly106Arg	345/931	316/543	106/180	G/R	Ggg/Agg	rs780098835&COSV51937707&COSV99243178	deleterious(0)	probably_damaging(0.988)	0.000203	gnomAD_AMR	uncertain_significance	25.1	3.62525	2.36					0	0.271	D	M&.&M	D&D&D	D&D&D	D&.&.
chr17	41845546	.	G	A	SMHC02010s000	NA	missense_variant	MODERATE	KLHL10	ENST00000293303.5:c.1105G>A	ENSP00000293303.4:p.Val369Met	1213/2012	1105/1827	369/608	V/M	Gtg/Atg		deleterious(0)	probably_damaging(0.997)				27	3.99871	2.27					0.93	0.327	D	L	D	N	D
chr17	42536444	.	GC	G	SMHC01887d000	NA	frameshift_variant	HIGH	NAGLU	ENST00000225927.7:c.174del	ENSP00000225927.1:p.Lys59SerfsTer63	205/2475	173/2232	58/743	A/X	gCc/gc									2.14					0	0.159
chr17	44355171	rs1444819311	C	T	SMHC02028s000	NA	missense_variant	MODERATE	FAM171A2	ENST00000293443.12:c.1043G>A	ENSP00000293443.6:p.Arg348Lys	1182/3138	1043/2481	348/826	R/K	aGg/aAg	rs1444819311	deleterious(0.01)	probably_damaging(0.965)	9.195e-05	gnomAD_EAS		25.5	3.73248	2.11							U	M	D	N	D
chr17	44666492	.	C	CTTT	SMHC01685s000	NA	inframe_insertion	MODERATE	MEIOC	ENST00000409122.7:c.584_586dup	ENSP00000386452.1:p.Phe195dup	727-728/4610	581-582/2859	194/952	A/AF	gct/gcTTTt
chr17	61400253	.	TG	T	SMHC01810s000	NA	frameshift_variant	HIGH	TBX2	ENST00000240328.4:c.78del	ENSP00000240328.3:p.Met26IlefsTer82	412/3433	78/2139	26/712	M/X	atG/at									3.16					0.96
chr17	69523627	.	A	G	SMHC01676s000	NA	missense_variant	MODERATE	MAP2K6	ENST00000590474.7:c.649A>G	ENSP00000468348.1:p.Lys217Glu	937/13405	649/1005	217/334	K/E	Aaa/Gaa		deleterious(0)	probably_damaging(0.999)				32	4.46245	3.16					0.95	0.366	D	N&.&.	D&D	.&.&.	D&.&.
chr18	2890831	.	C	CT	SMHC01582s000	NA	frameshift_variant	HIGH	EMILIN2	ENST00000254528.4:c.705dup	ENSP00000254528.3:p.Asp236Ter	887-888/5944	704-705/3162	235/1053	P/PX	cct/ccTt														0	0.901
chr18	55228846	.	C	T	SMHC01656s000	NA	splice_donor_variant	HIGH	TCF4	ENST00000398339.5:c.2185+1G>A													32	4.4965	4.16	0.999987	0.934			1	0.294
chr18	58245463	.	T	G	SMHC01890s000	NA	missense_variant	MODERATE	NEDD4L	ENST00000382850.8:c.159T>G	ENSP00000372301.3:p.Asp53Glu	272/8251	159/2868	53/955	D/E	gaT/gaG		tolerated(0.72)	benign(0)				16.75	1.65783	1.04					1	0.566	D	N&N&N&N&.&.	D&D&D&D&D&D&D&D&D&D&D&D	N&N&N&N&N&.	P&B&B&.&B&B
chr19	10924150	rs777454220	A	G	SMHC00827s000	NA	missense_variant	MODERATE	YIPF2	ENST00000586748.6:c.410T>C	ENSP00000466055.1:p.Val137Ala	569/2111	410/951	137/316	V/A	gTc/gCc	rs777454220	deleterious(0.02)	benign(0.171)	0.0009472	gnomAD_SAS		20.7	2.18026	2.04					0	0.383	N	L&L&.&.	D&D&D	D&.&.&.	B&B&.&.
chr19	12044893	rs773648883	G	GT	SMHC00843s000	NA	frameshift_variant	HIGH	ZNF878	ENST00000547628.2:c.507dup	ENSP00000447931.1:p.Pro170ThrfsTer3	667-668/1756	507-508/1596	169-170/531	-/X	-/A	rs773648883			0.0002721	gnomAD_EAS		22.2	2.42315						0	0.835
chr19	13100922	rs199858890	G	A	NA	SMHC01850s000	missense_variant	MODERATE	LYL1	ENST00000264824.5:c.250C>T	ENSP00000264824.3:p.Arg84Trp	602/1481	250/843	84/280	R/W	Cgg/Tgg	rs199858890	deleterious(0)	possibly_damaging(0.548)	0.002	EAS		23.6	3.10696	0.783					0.67		N	M&.	N	D&.	D&.
chr19	17842317	.	T	C	NA	SMHC01856s000	missense_variant&splice_region_variant	MODERATE	JAK3	ENST00000458235.7:c.860A>G	ENSP00000391676.1:p.Glu287Gly	910/5386	860/3375	287/1124	E/G	gAg/gGg		deleterious(0.01)	benign(0.197)				31	4.38387	0.693	0.99983	0.99			1	0.159	N	M&M&M	D&D&D	D&D&D	P&P&B
chr19	18168474	.	G	A	SMHC01815s000	NA	splice_acceptor_variant	HIGH	PIK3R2	ENST00000222254.13:c.1737-1G>A													34	5.72222	1.55	0.999978	0.928			0.94							L2b
chr19	35032620	rs757554677	C	T	SMHC01823s000	NA	missense_variant	MODERATE	SCN1B	ENST00000415950.4:c.133C>T	ENSP00000396915.2:p.Arg45Cys	241/4537	133/807	45/268	R/C	Cgc/Tgc	rs757554677&COSV52893647	deleterious(0)	probably_damaging(0.984)	6.533e-05	gnomAD_SAS	uncertain_significance	28.5	4.18197	-3.09					0.21	0.0653	N	L&L&L&.&.&.	D&D	D&.&D&.&.&.	D&D&D&D&.&.
chr19	39422807	.	G	A	SMHC01748s000	NA	missense_variant	MODERATE	PLEKHG2	ENST00000425673.6:c.1753G>A	ENSP00000392906.2:p.Ala585Thr	2519/8048	1753/4161	585/1386	A/T	Gcc/Acc		deleterious_low_confidence(0)	benign(0.1)				23.6	3.07062	1.94					0	0.407	N	M&.	D&D&N&N&N	.&N	B&B
chr19	40556119	rs747837833	G	A	SMHC01846d000	NA	missense_variant	MODERATE	SPTBN4	ENST00000598249.6:c.5120G>A	ENSP00000469242.1:p.Arg1707His	5440/8910	5120/7695	1707/2564	R/H	cGc/cAc	rs747837833&COSV100151865&COSV58956566	deleterious(0)	probably_damaging(0.999)	4.653e-05	gnomAD_FIN		27.9	4.12107	-1.27						0.365	D	.&.&M&M&.&.	D&D&D&D	.&.&D&.&D&D	.&.&D&D&.&.
chr19	50323413	.	A	C	SMHC02027s000	NA	missense_variant	MODERATE	KCNC3	ENST00000670667.1:c.1540T>G	ENSP00000499301.1:p.Trp514Gly	1706/3688	1540/2307	514/768	W/G	Tgg/Ggg		deleterious(0.02)	probably_damaging(0.944)				27.5	4.06435	2.61					0.85		U	.&N	D&D&D&D	D&D	D&D
chr19	57754652	rs771836470	C	T	SMHC01815s000	NA	stop_gained	HIGH	ZNF776	ENST00000317178.10:c.1522C>T	ENSP00000321812.5:p.Arg508Ter	1766/5262	1522/1557	508/518	R/*	Cga/Tga	rs771836470			6.173e-05	gnomAD_AFR		32	4.55585	-0.019					0	0.826			N
chr20	31782360	.	T	C	SMHC00813s000	NA	missense_variant	MODERATE	TPX2	ENST00000340513.4:c.1274T>C	ENSP00000341145.4:p.Leu425Pro	1802/3605	1274/2352	425/783	L/P	cTg/cCg		deleterious(0.01)	possibly_damaging(0.583)				18.83	1.94375	-3.74					0.99	0.0807	N	M&.	N&N	D&D	P&.
chr20	36805872	.	T	A	SMHC00824s000	NA	missense_variant	MODERATE	SOGA1	ENST00000237536.9:c.2900A>T	ENSP00000237536.4:p.Asp967Val	3094/14218	2900/4986	967/1661	D/V	gAc/gTc		deleterious(0)	benign(0.327)				24.8	3.53147						1		D	.&.	D&D&D&D	N&N	.&.
chr20	39003827	rs1396485138	C	T	SMHC01717s000	NA	stop_gained	HIGH	DHX35	ENST00000252011.8:c.931C>T	ENSP00000252011.3:p.Arg311Ter	955/3314	931/2112	311/703	R/*	Cga/Tga	rs1396485138			8.792e-06	gnomAD_NFE		40	8.03688	2.76					0	0.975	D	.&.&.	A&A&A	.&.&.	.&.&.
chr20	45316738	.	G	C	SMHC00820s000	NA	missense_variant	MODERATE	RBPJL	ENST00000343694.8:c.1333G>C	ENSP00000341243.3:p.Asp445His	1416/2502	1333/1554	445/517	D/H	Gac/Cac		deleterious(0.03)	possibly_damaging(0.68)				27.6	4.07853	2.42					0	0.538	D	.&L	D&D&D	N&N	.&D
chr20	54157426	rs988715134	G	A	SMHC00822d000	NA	stop_gained	HIGH	CYP24A1	ENST00000216862.8:c.1396C>T	ENSP00000216862.3:p.Arg466Ter	1803/3278	1396/1545	466/514	R/*	Cga/Tga	rs988715134			0.000163	gnomAD_OTH		39	7.84875	1.22					0	0.973	D	.&.	A&A&D	.&.	.&.
chr20	61910524	.	C	T	SMHC01887d000	NA	missense_variant	MODERATE	CDH4	ENST00000614565.5:c.1291C>T	ENSP00000484928.1:p.Arg431Cys	1544/6678	1291/2751	431/916	R/C	Cgc/Tgc	COSV100849111	deleterious(0)	probably_damaging(0.989)				24.5	3.42311	-2.5					0.97	0.252	D	H&.&.	D&D	.&.&D	D&.&.
chr21	32315046	rs369947786	G	A	SMHC00831d000	NA	stop_gained	HIGH	URB1	ENST00000382751.4:c.6688C>T	ENSP00000372199.3:p.Gln2230Ter	6790/10818	6688/6816	2230/2271	Q/*	Cag/Tag	rs369947786&COSV57936285			0.0007225	AA		37	7.10593	2.23							N		D
chr22	36564613	.	C	G	SMHC01575s000	NA	missense_variant	MODERATE	CACNG2	ENST00000300105.7:c.710G>C	ENSP00000300105.6:p.Ser237Thr	1886/5642	710/972	237/323	S/T	aGc/aCc		deleterious(0.01)	benign(0.444)				23.7	3.12305	1.33					0.96		D	M	D	N	P
chr22	42213982	.	C	CT	SMHC00860s000	NA	frameshift_variant	HIGH	TCF20	ENST00000677622.1:c.1323dup	ENSP00000503828.1:p.Gly442ArgfsTer14	1674-1675/7624	1323-1324/5883	441-442/1960	-/X	-/A														1	0.0597
chrX	37010136	rs782543670	G	A	SMHC01812s000	NA	missense_variant	MODERATE	FAM47C	ENST00000358047.5:c.1726G>A	ENSP00000367913.3:p.Asp576Asn	1771/3299	1726/3108	576/1035	D/N	Gat/Aat	rs782543670&COSV63723763	deleterious_low_confidence(0.02)	benign(0.037)	0.001098	gnomAD_AFR		10.1	0.868369						0.06	0.714		N	N	N	P		chrX:34937554
chrX	103825244	.	G	A	SMHC00842s000	NA	missense_variant	MODERATE	RAB9B	ENST00000243298.3:c.541C>T	ENSP00000243298.2:p.His181Tyr	855/3772	541/606	181/201	H/Y	Cat/Tat		tolerated(0.3)	benign(0.242)				21.7	2.32104	2.23					0.62		D	N	D	N	P
