# Supplementary material for: Identification of de novo mutations in the Chinese ASD cohort via whole-exome sequencing unveils brain regions implicated in autism
Source: medRxiv preprint, doi:10.1101/2021.07.14.21260545, version 1 (2021-07-22)
Supplement: Supplemental Table 2 [file 260545_file12.xlsx]

## Sheet: pLI≥0.9
	BF.LoF	BF.Mis	BF.total	qval	pval
CUX1	18.2334	3.97707	72.5153	0.207616	2.79192e-05
SCN2A	17.7655	3.93344	69.8796	0.210694	3.06564e-05
PTEN	19.476	0.973501	18.9599	0.450389	0.000424262
RBMS1	19.3863	0.971185	18.8277	0.456872	0.000503093
RORB	19.3751	0.966067	18.7177	0.464205	0.000574807
MFSD2A	19.3361	0.956189	18.4889	0.474188	0.000722067
TBX2	19.3138	0.940272	18.1602	0.476908	0.000906553
TCF4	19.1144	0.948932	18.1383	0.478147	0.000915312
PIK3R2	19.1862	0.943723	18.1064	0.481415	0.000926808
CTCF	19.1641	0.939535	18.0053	0.483345	0.000976625
CACNA2D3	18.9309	0.923989	17.4919	0.489105	0.00119177
SMC5	18.508	0.925432	17.1279	0.490846	0.00131275
ZMYM2	18.4814	0.91801	16.9661	0.491717	0.00135764
ASTN1	18.4867	0.892316	16.496	0.492707	0.00146767
NFASC	18.4495	0.890028	16.4206	0.493678	0.00148026
SYNGAP1	18.4442	0.884797	16.3194	0.49464	0.00149614
TCF20	18.0924	0.868907	15.7206	0.496719	0.00156457
RALGAPA1	17.5025	0.87826	15.3717	0.497863	0.00160344
REV3L	16.6159	0.820006	13.6252	0.502083	0.00171949
SRCAP	16.6635	0.765856	12.7619	0.505633	0.00174139
ANK2	16.0101	0.765874	12.2617	0.50749	0.0017611
CACNG2	0.982199	4.50131	4.42118	0.587493	0.00404281
MAP2K6	0.970694	4.55044	4.41708	0.590438	0.00410139
PSMC3	0.97576	4.50433	4.39515	0.59612	0.00451634
CTBP1	0.978706	4.45927	4.36431	0.609177	0.00507418
TERF2	0.971759	4.47723	4.35078	0.616303	0.0053156
INPP5A	0.970429	4.47723	4.34483	0.622961	0.00543658
CSNK1E	0.975493	4.43843	4.32966	0.631191	0.00571577
NRBP1	0.963807	4.47573	4.31374	0.635059	0.00597197
SIRT1	0.963544	4.47423	4.31111	0.636934	0.00601139
KLHL2	0.964071	4.45479	4.29474	0.64058	0.00630372
KLHL10	0.972025	4.40887	4.28554	0.642352	0.00644003
PDE1B	0.966583	4.4325	4.28438	0.644088	0.00646302
SPAST	0.96328	4.44437	4.28117	0.647461	0.00650572
GLYR1	0.963016	4.41919	4.25575	0.650715	0.00687798
MEPCE	0.963412	4.37665	4.21652	0.659843	0.00744731
MAGEL2	0.954357	4.41035	4.20904	0.664058	0.00754968
TPX2	0.951749	4.41624	4.20315	0.665416	0.00760169
PROX1	0.960909	4.34906	4.17905	0.669363	0.00789292
TLK1	0.950188	4.39419	4.1753	0.670638	0.0079296
COG3	0.949928	4.37957	4.16027	0.673131	0.00813489
CTNNB1	0.953443	4.3592	4.15625	0.674349	0.00818799
LRRC41	0.955925	4.29595	4.10661	0.680172	0.00876061
HCN1	0.949538	4.31022	4.09272	0.682399	0.00891444
SLC9A1	0.958283	4.26335	4.08549	0.687681	0.00898068
BAHD1	0.956056	4.25349	4.06657	0.688697	0.00916078
NEDD4L	0.949278	4.26053	4.04443	0.691663	0.0093699
CLSTN3	0.95253	4.24086	4.03954	0.692626	0.00940111
SLC4A4	0.943841	4.269	4.02926	0.693579	0.00950676
BTBD11	0.947074	4.22548	4.00184	0.699044	0.00974927
CAND1	0.939335	4.2563	3.9981	0.699915	0.00978048
GTF2I	0.929375	4.27465	3.97276	0.70078	0.00996606
SALL1	0.950188	4.13874	3.93258	0.704141	0.0103586
CDH4	0.950708	4.12518	3.92184	0.704962	0.0104505
SOGA1	0.936003	4.17976	3.91227	0.705775	0.0105179
SLTM	0.918523	4.21712	3.87352	0.706585	0.0107615
JAK3	0.936387	4.09019	3.83	0.708977	0.0110051
GAPVD1	0.915268	4.11842	3.76946	0.71207	0.0113308
PARD3	0.912649	4.0942	3.73657	0.714322	0.0114649
GRIN2B	0.929629	3.97965	3.6996	0.715065	0.0116188
DAPK1	0.923302	3.98224	3.67681	0.716532	0.011691
MAP3K4	0.90533	4.05027	3.66683	0.717257	0.0117288
LRP6	0.892946	4.03971	3.60724	0.7187	0.0119034
SCRIB	0.921286	3.87411	3.56917	0.719421	0.0120129
AHDC1	0.931409	3.80979	3.54847	0.720137	0.0120896
SCN8A	0.912524	3.86537	3.52725	0.722245	0.0121553
CHD2	0.883023	3.97319	3.50842	0.722937	0.0122138
SCN1A	0.887002	3.92962	3.48558	0.723627	0.0122691
CASZ1	0.921412	3.73008	3.43694	0.725665	0.0124333
PLXND1	0.906566	3.76484	3.41308	0.72634	0.01247
USP24	0.874763	3.85045	3.36823	0.727016	0.0125494
NAV3	0.876433	3.83437	3.36057	0.728349	0.012562
CHD9	0.86282	3.73604	3.22353	0.729688	0.0128226
NSD1	0.861647	3.70752	3.19457	0.731031	0.0128543
IGF2R	0.868711	3.64435	3.16589	0.731698	0.0128998
TLN2	0.860475	3.58366	3.08365	0.732375	0.0130021
FBN1	0.831729	3.53871	2.94325	0.734417	0.0131204
USP34	0.793175	3.5298	2.79975	0.735124	0.0132025
BSN	0.831729	3.06489	2.54915	0.736598	0.0133613
RYR2	0.789959	3.02217	2.38739	0.737368	0.0134467
MDN1	0.709093	2.91134	2.06441	0.740546	0.0135561
IP6K2	0.994242	0.993325	0.987606	0.883704	0.037299
UBE2W	0.991193	0.992452	0.983711	0.912856	0.0640603
IL15	0.991112	0.991949	0.983133	0.914999	0.0677227
UBE2D2	0.9905	0.992108	0.982683	0.917368	0.0723671
UBE2D1	0.9905	0.990867	0.981454	0.921259	0.0814315
VAMP4	0.990188	0.990709	0.980988	0.922673	0.0853621
YPEL2	0.988601	0.992134	0.980825	0.923006	0.0863442
RPL35A	0.990093	0.990577	0.980763	0.923152	0.08678
RBM4	0.992458	0.987523	0.980075	0.924883	0.0923419
BTF3	0.990337	0.989391	0.97983	0.925655	0.0951273
RBX1	0.989347	0.99026	0.979711	0.92601	0.0964362
LSM1	0.988642	0.990709	0.979456	0.926801	0.0994887
POLR2H	0.989849	0.988785	0.978748	0.928435	0.10647
MAX	0.988926	0.989522	0.978565	0.928925	0.108813
WDR20	0.992281	0.985844	0.978234	0.929383	0.111052
ARPC3	0.988696	0.989075	0.977894	0.929928	0.11383
PTPLB	0.989292	0.988049	0.977469	0.930564	0.117269
BCL2L11	0.990093	0.986709	0.976934	0.9315	0.122726
RPL21	0.987978	0.988391	0.976508	0.932149	0.126815
LSM12	0.98745	0.988706	0.976298	0.932429	0.128669
NDFIP1	0.988154	0.98797	0.976266	0.932502	0.129212
ARF4	0.98833	0.987602	0.976077	0.932819	0.131394
RPL23	0.988831	0.987051	0.976027	0.932935	0.132212
VPS29	0.987585	0.988128	0.97586	0.933171	0.133951
STMN2	0.987409	0.988101	0.97566	0.933379	0.135477
UBE2I	0.988411	0.986972	0.975534	0.933546	0.136785
RPL26	0.988628	0.986605	0.975385	0.933773	0.138532
NRAS	0.988113	0.986998	0.975266	0.933864	0.139239
RHEB	0.987734	0.987182	0.975073	0.934084	0.140979
AP2S1	0.989279	0.985635	0.975067	0.934104	0.141142
HDGFRP3	0.987639	0.987182	0.974979	0.934225	0.142123
PPP1R8	0.989726	0.985058	0.974938	0.934278	0.142557
ZBTB8OS	0.986814	0.987917	0.97489	0.934331	0.142993
RAP1A	0.987964	0.986736	0.974859	0.934383	0.14343
RAP1B	0.987666	0.986972	0.974799	0.934448	0.143975
ZFAND5	0.987991	0.986631	0.974782	0.934474	0.144192
PARK7	0.989279	0.985085	0.974523	0.934811	0.147082
RPS19	0.989279	0.984927	0.974368	0.934953	0.148331
EDF1	0.989645	0.984509	0.974314	0.935008	0.14882
ARPC4	0.987544	0.986578	0.97429	0.93502	0.148929
RPL15	0.987802	0.98608	0.974051	0.935277	0.151324
ATP6V0B	0.988953	0.984797	0.973918	0.93544	0.152795
CXorf56	0.987477	0.986028	0.973679	0.935684	0.155136
UBE2E2	0.987815	0.985661	0.973651	0.935706	0.155354
CBX1	0.986381	0.987051	0.973608	0.935756	0.155844
RAB18	0.98611	0.987313	0.9736	0.935773	0.156006
RSL24D1	0.987531	0.98587	0.973577	0.935811	0.156389
TPT1	0.987003	0.98587	0.973057	0.936338	0.161787
RPS13	0.986719	0.986028	0.972932	0.93646	0.163091
RPL9	0.988411	0.984326	0.972918	0.936486	0.163364
UBE2F	0.988018	0.984692	0.972894	0.936531	0.163856
RPS11	0.989387	0.98328	0.972845	0.936591	0.164511
HPRT1	0.985435	0.987051	0.972674	0.936724	0.165979
CNBP	0.98837	0.984038	0.972594	0.936758	0.16636
FTH1	0.987612	0.984744	0.972545	0.936792	0.166741
RALA	0.98584	0.986447	0.972479	0.936855	0.16745
CACYBP	0.986381	0.985897	0.972469	0.936879	0.167722
TMEM9B	0.988005	0.983934	0.972131	0.937215	0.171643
RAB7A	0.987747	0.983777	0.971723	0.937611	0.176604
RAB10	0.986881	0.98464	0.971722	0.937615	0.176658
FAM60A	0.986435	0.985085	0.971722	0.93762	0.176713
RPS18	0.986895	0.984352	0.971452	0.937874	0.180031
NCS1	0.987314	0.983934	0.971452	0.937878	0.180085
UBE2K	0.98584	0.985399	0.971446	0.937899	0.180358
UBE2H	0.985705	0.98553	0.971442	0.937903	0.180413
REEP1	0.98745	0.98362	0.971275	0.938027	0.182047
AKIRIN2	0.98449	0.986552	0.97125	0.938043	0.182265
HMGB2	0.987788	0.983228	0.971221	0.938063	0.182537
NAA60	0.989509	0.981507	0.97121	0.938067	0.182591
HOXC6	0.989482	0.981481	0.971158	0.938095	0.182967
RAN	0.98584	0.984954	0.971007	0.938235	0.184876
RAB30	0.98503	0.985582	0.970828	0.938372	0.18678
RAB2A	0.984895	0.985635	0.970746	0.938438	0.187704
KCNIP4	0.986854	0.983437	0.970509	0.93863	0.190481
RPS10	0.986868	0.983202	0.97029	0.93881	0.193144
C6orf62	0.985975	0.98409	0.970289	0.938814	0.193253
ANKRD46	0.98657	0.983489	0.970281	0.938825	0.193362
FGF9	0.987219	0.98281	0.97025	0.938864	0.193961
ANP32B	0.984085	0.98587	0.97018	0.938932	0.195047
YIPF5	0.985975	0.983855	0.970057	0.939006	0.196193
RPL14	0.98584	0.983986	0.970053	0.93901	0.196248
RAB14	0.984625	0.985189	0.970042	0.93902	0.196412
CXorf65	0.98557	0.984221	0.970019	0.939031	0.196575
THOC7	0.984355	0.985399	0.969982	0.939059	0.197011
UBE2R2	0.987192	0.982497	0.969914	0.939108	0.197774
RPS7	0.988831	0.980751	0.969798	0.939207	0.199351
PAPOLA	0.982872	0.986657	0.969758	0.939251	0.20006
DCUN1D5	0.98476	0.984744	0.969736	0.939278	0.200497
PSMA6	0.986435	0.983071	0.969736	0.939281	0.200552
SARNP	0.983276	0.986185	0.969692	0.939335	0.201425
NUDT21	0.986854	0.982602	0.969685	0.939342	0.201534
PSMA5	0.984625	0.984744	0.969604	0.939405	0.202624
PTHLH	0.987341	0.982002	0.969571	0.939421	0.202896
AMMECR1	0.986246	0.982915	0.969395	0.939513	0.204422
ZMAT2	0.985165	0.983855	0.969259	0.939638	0.206546
UCHL1	0.985435	0.983489	0.969165	0.939698	0.207584
FCF1	0.983141	0.985608	0.968992	0.939825	0.209814
CSNK2B	0.986665	0.981924	0.968829	0.939935	0.211773
ANP32A	0.986759	0.981819	0.96882	0.939938	0.211827
CCND3	0.98772	0.980647	0.968605	0.940091	0.214605
SNRPA1	0.984895	0.983437	0.968582	0.940114	0.21504
RER1	0.985435	0.982889	0.968573	0.94012	0.21515
PCGF3	0.986854	0.981402	0.968501	0.940172	0.216129
PAFAH1B2	0.984625	0.983489	0.968368	0.94027	0.217979
SET	0.98422	0.983698	0.968175	0.940448	0.221404
YWHAB	0.985975	0.981924	0.968152	0.94047	0.22184
ANP32E	0.983007	0.984613	0.967882	0.940649	0.225435
RABL2A	0.9853	0.98221	0.967772	0.940718	0.22685
RIBC1	0.983007	0.9843	0.967573	0.940846	0.229569
PDCD10	0.982468	0.984744	0.96748	0.940905	0.230823
CD79A	0.9853	0.981898	0.967463	0.940923	0.231205
SRSF3	0.984895	0.982289	0.967451	0.940933	0.231422
PITPNC1	0.986895	0.980205	0.967359	0.940978	0.232403
PSMB2	0.98503	0.981871	0.967173	0.941086	0.234741
N4BP2L1	0.985975	0.98083	0.967074	0.941152	0.236264
FAM168A	0.985975	0.980778	0.967022	0.941172	0.236645
STYX	0.981257	0.985451	0.966981	0.941206	0.237408
RBM8A	0.986448	0.980205	0.966922	0.941256	0.238549
CHMP2A	0.988005	0.978595	0.966856	0.941287	0.239255
RAB8A	0.986421	0.980127	0.966818	0.941306	0.23969
NAPB	0.982603	0.983855	0.966739	0.941346	0.240616
CCNYL1	0.982333	0.984117	0.96673	0.941353	0.24078
RDH10	0.984625	0.981819	0.966724	0.941363	0.240997
PSMA2	0.982333	0.983934	0.966551	0.941456	0.243174
ICMT	0.983007	0.983202	0.966494	0.941499	0.244211
PLP1	0.984625	0.981481	0.96639	0.941561	0.245681
LHX6	0.989849	0.976289	0.966378	0.941574	0.246009
TNFSF12	0.98449	0.981533	0.966309	0.941601	0.24666
RPS3	0.98557	0.980361	0.966215	0.941659	0.248069
TMEM165	0.984355	0.981481	0.966125	0.941701	0.249104
CD81	0.986651	0.97914	0.966069	0.941745	0.250192
UBE2Z	0.98611	0.979633	0.966027	0.94176	0.250571
IL27	0.986408	0.979296	0.965985	0.941789	0.251279
SNAP25	0.98584	0.979841	0.965967	0.941804	0.25166
C11orf57	0.9853	0.980335	0.965924	0.941832	0.252367
NUCKS1	0.983411	0.98221	0.965916	0.941838	0.25253
VDAC3	0.984085	0.981533	0.965912	0.941842	0.252639
RND3	0.98584	0.979685	0.965813	0.941906	0.254272
CCNC	0.981391	0.984117	0.965804	0.941912	0.254436
RPS5	0.988262	0.977272	0.965801	0.941915	0.254491
CDK1	0.983411	0.982054	0.965763	0.941931	0.254925
EIF4E	0.981391	0.984064	0.965752	0.941938	0.255088
SPIN1	0.98611	0.979166	0.965565	0.942013	0.25705
CBFB	0.983815	0.981402	0.965519	0.942042	0.257811
RAB33B	0.985975	0.979036	0.965305	0.942162	0.261013
OTUB1	0.986448	0.978517	0.965256	0.942186	0.261667
RAB11A	0.982064	0.98281	0.965183	0.942218	0.262538
PSMB7	0.98611	0.978724	0.96513	0.942241	0.263191
CD79B	0.98584	0.978828	0.964968	0.942335	0.265854
NANOG	0.983411	0.981194	0.964917	0.942357	0.266397
PSMA3	0.982333	0.98221	0.964858	0.94237	0.26678
GCH1	0.98503	0.979399	0.964738	0.94242	0.268249
RPL10	0.98557	0.978854	0.964729	0.942428	0.268467
GPM6A	0.98503	0.979322	0.964661	0.942471	0.269715
CLTA	0.985165	0.979114	0.964588	0.94249	0.27026
PCNA	0.985705	0.978465	0.964478	0.942529	0.271403
BDNF	0.98503	0.978984	0.964328	0.942591	0.27325
MAPRE1	0.983681	0.980257	0.96426	0.94262	0.274119
RAB4B	0.98653	0.977402	0.964236	0.942633	0.2745
RND1	0.984355	0.979555	0.96423	0.942636	0.274608
RUSC1-AS1	0.989184	0.974764	0.964221	0.942642	0.274769
ATG5	0.98193	0.981924	0.96418	0.942669	0.275584
ZFAND3	0.98476	0.979088	0.964166	0.942676	0.275856
YWHAE	0.984355	0.979477	0.964153	0.942684	0.276019
PSME3	0.982872	0.980934	0.964132	0.942693	0.276292
FLT3LG	0.9853	0.978439	0.964056	0.942725	0.277272
MPPED2	0.983815	0.979893	0.964034	0.942737	0.277655
TSNAX	0.982468	0.98122	0.964017	0.942755	0.278199
FHL1	0.985705	0.977894	0.963915	0.942794	0.279396
TNFSF13B	0.983681	0.979893	0.963902	0.942799	0.279558
LYPLA2	0.984355	0.979166	0.963847	0.942819	0.280157
TSN	0.981391	0.982106	0.96383	0.942821	0.280211
CAPZA2	0.981795	0.981507	0.963638	0.942906	0.282926
C19orf66	0.989252	0.97399	0.963522	0.942952	0.284338
DCUN1D1	0.979779	0.983359	0.963474	0.942971	0.284934
U2AF1	0.986868	0.976289	0.963468	0.942972	0.285041
RPL18A	0.984355	0.978621	0.96331	0.943021	0.286617
RAB35	0.983411	0.979529	0.96328	0.943028	0.286835
FAM192A	0.980585	0.982341	0.963268	0.943037	0.287106
RPS8	0.98422	0.978698	0.963254	0.943045	0.287379
TSPAN5	0.982199	0.980699	0.963242	0.943047	0.287434
CTDNEP1	0.984355	0.978465	0.963157	0.943083	0.288631
RPL19	0.984355	0.978335	0.963029	0.94312	0.289829
ELOVL6	0.982333	0.980335	0.963016	0.943123	0.289938
IL1B	0.981391	0.981142	0.962884	0.943172	0.291566
DERL2	0.98193	0.980439	0.962722	0.94323	0.293522
HDAC8	0.983141	0.97914	0.962633	0.943267	0.294772
PITPNA	0.982468	0.979763	0.962586	0.943288	0.29548
MSI2	0.984355	0.977868	0.96257	0.9433	0.295913
PSMA1	0.981526	0.980491	0.962378	0.943354	0.297815
ERLIN1	0.98449	0.97748	0.962319	0.943376	0.298524
FGF8	0.985975	0.975875	0.962189	0.943425	0.300265
EMX2	0.984355	0.97748	0.962187	0.943428	0.300374
CABP1	0.974958	0.986841	0.962129	0.943448	0.301081
JAZF1	0.984625	0.977117	0.962094	0.943463	0.301626
CNOT7	0.980585	0.981116	0.962067	0.943471	0.301899
FGF13	0.982872	0.978828	0.962063	0.943473	0.301954
NPM1	0.980451	0.981168	0.961987	0.943494	0.302716
LCORL	0.974424	0.987103	0.961857	0.943548	0.304673
PSMA7	0.98476	0.976729	0.961843	0.943553	0.304837
C16orf72	0.980316	0.981116	0.961804	0.943576	0.305706
MSL1	0.983276	0.978024	0.961668	0.943624	0.307448
UCK2	0.984895	0.976366	0.961618	0.943635	0.307881
CD86	0.98395	0.977272	0.961587	0.943655	0.308588
RPL7	0.979645	0.981298	0.961324	0.943734	0.311635
PITPNB	0.981122	0.979815	0.961319	0.943737	0.311743
VDAC1	0.983276	0.977661	0.961311	0.943738	0.311797
GEMIN8	0.982872	0.977946	0.961196	0.943774	0.313159
CDCA3	0.981122	0.979685	0.961191	0.943776	0.313213
RGS7BP	0.982737	0.97805	0.961166	0.943784	0.313539
SGTB	0.980182	0.980569	0.961136	0.943795	0.313973
TMEM204	0.986922	0.973861	0.961125	0.943801	0.314191
EIF4E2	0.980988	0.979711	0.961085	0.943815	0.314736
DAZL	0.979511	0.981064	0.960962	0.943845	0.315875
SLC35G1	0.983141	0.977428	0.96095	0.943849	0.316035
CAPZA1	0.982737	0.977713	0.960835	0.943888	0.317615
USP46	0.98476	0.975668	0.960799	0.9439	0.318049
CDK5	0.986584	0.973861	0.960796	0.943902	0.318104
TOMM40	0.982737	0.977195	0.960326	0.944035	0.323431
RPL13	0.98749	0.972471	0.960305	0.94404	0.323648
NIPSNAP1	0.977633	0.982132	0.960165	0.944076	0.325116
HCCS	0.981122	0.978569	0.960096	0.944088	0.325605
KLF6	0.985165	0.974455	0.959998	0.944112	0.326581
TXNL1	0.979511	0.980049	0.959968	0.944121	0.326961
AHSA1	0.980451	0.979062	0.959922	0.944131	0.327396
DNAJB6	0.978974	0.980491	0.959875	0.944142	0.327831
MTCH1	0.979242	0.980205	0.959858	0.944151	0.328212
PURG	0.983411	0.975875	0.959686	0.944189	0.329842
TMEM110	0.982872	0.976289	0.959567	0.94422	0.331146
FST	0.983141	0.975798	0.959347	0.944267	0.333215
POU6F1	0.985435	0.973501	0.959321	0.944274	0.333596
EIF2S1	0.980854	0.977998	0.959273	0.944288	0.334141
DLX1	0.9853	0.973501	0.95919	0.9443	0.334685
RUNDC3A	0.985435	0.973243	0.959068	0.944322	0.335664
EI24	0.98193	0.976625	0.958977	0.944345	0.336589
RNPS1	0.98503	0.973501	0.958927	0.94436	0.33724
PCGF1	0.981391	0.977065	0.958883	0.944371	0.337783
MAPK1	0.980451	0.977972	0.958853	0.944379	0.338111
ATG3	0.978571	0.979789	0.958794	0.944386	0.338437
QKI	0.98166	0.976703	0.958791	0.944387	0.338492
PDGFC	0.98166	0.976677	0.958765	0.944397	0.338926
FAM105B	0.98166	0.976599	0.958689	0.944415	0.339743
RPL7A	0.982603	0.975617	0.958643	0.944431	0.340452
HNRNPD	0.977366	0.98083	0.958629	0.944436	0.34067
SRSF1	0.983276	0.974842	0.958539	0.944461	0.341868
SIAH1	0.98193	0.976082	0.958444	0.944486	0.342957
MDH1	0.980451	0.97748	0.95837	0.944517	0.344372
RIMS4	0.984895	0.972986	0.958288	0.944533	0.345135
SULT4A1	0.983141	0.974713	0.95828	0.944536	0.345243
CTDSP1	0.982333	0.975436	0.958203	0.94455	0.345896
RQCD1	0.980719	0.977039	0.958201	0.944551	0.34595
PPP1CC	0.980048	0.977635	0.958129	0.944567	0.346656
MAPRE2	0.977767	0.979893	0.958108	0.944575	0.347035
ELOVL5	0.979913	0.977713	0.958074	0.944585	0.347524
EIF4H	0.982199	0.975126	0.957767	0.944646	0.350348
COPS7A	0.981526	0.975746	0.95772	0.94466	0.350999
TEX264	0.98476	0.972213	0.957397	0.944732	0.35442
RAD51	0.979108	0.977817	0.957388	0.944736	0.354583
SNX6	0.975092	0.981793	0.957339	0.944746	0.355071
RPL6	0.979511	0.977272	0.957249	0.944767	0.356104
YWHAG	0.98422	0.972471	0.957125	0.944787	0.357193
AMD1	0.981795	0.974764	0.957019	0.94482	0.358717
SUGT1	0.977232	0.979244	0.956948	0.944838	0.359635
PPIE	0.981795	0.974635	0.956892	0.944848	0.360125
SLC25A19	0.98476	0.971699	0.95689	0.944849	0.360179
SAE1	0.979376	0.976988	0.956838	0.94486	0.36072
RNF2	0.978706	0.977635	0.956817	0.944863	0.360828
LDB2	0.978437	0.977894	0.956808	0.944866	0.360991
RPLP0	0.980854	0.975436	0.95676	0.944879	0.36164
FAM49B	0.976696	0.979555	0.956728	0.944886	0.361966
TYMS	0.980182	0.975927	0.956586	0.944917	0.363545
MLF2	0.982199	0.973861	0.956525	0.944936	0.364468
RNF144A	0.980451	0.975591	0.956518	0.944938	0.364577
SPRY2	0.982468	0.973501	0.956433	0.94495	0.365172
PPP6C	0.979376	0.976522	0.956382	0.944957	0.36555
IFT46	0.980048	0.975849	0.956379	0.944958	0.365605
EFNB2	0.983681	0.972213	0.956347	0.944968	0.366091
PCGF5	0.97349	0.982367	0.956325	0.944972	0.366308
CSNK1A1	0.982603	0.973243	0.956311	0.944975	0.366524
KLF7	0.98449	0.971185	0.956122	0.94501	0.368266
CCND2	0.98422	0.971442	0.956113	0.945012	0.368428
HNRNPC	0.980316	0.975255	0.956058	0.94502	0.368752
C17orf75	0.979645	0.975849	0.955986	0.945037	0.369621
PIM3	0.983815	0.971699	0.955973	0.945038	0.369675
AEBP2	0.977366	0.978076	0.955938	0.945041	0.369839
CDC37L1	0.97884	0.976496	0.955833	0.945059	0.370765
TAZ	0.980585	0.974739	0.955814	0.945068	0.371253
CD72	0.978571	0.976729	0.955799	0.945072	0.371471
NODAL	0.981795	0.973501	0.955778	0.945084	0.372125
GTF2A1	0.977098	0.97805	0.95565	0.945109	0.373372
WDR82	0.98166	0.973501	0.955647	0.94511	0.373425
HNRNPAB	0.977499	0.977609	0.955612	0.94512	0.373966
FBXO28	0.978437	0.976573	0.955516	0.945146	0.37538
BRIX1	0.981122	0.973784	0.955402	0.945169	0.376573
ELAVL2	0.980854	0.974042	0.955393	0.945171	0.376681
CDK2	0.978571	0.976263	0.955343	0.945181	0.377223
PPP2CA	0.980316	0.974506	0.955324	0.945184	0.377385
GET4	0.982872	0.971956	0.955309	0.945187	0.377547
PDXK	0.98193	0.972728	0.95515	0.945228	0.379718
RPL5	0.977767	0.97678	0.955064	0.945249	0.380858
FSTL1	0.979376	0.975126	0.955015	0.945263	0.381618
MBD2	0.97576	0.978698	0.954975	0.945272	0.382162
RPS10-NUDT3	0.979645	0.974713	0.954872	0.94529	0.383194
CREB1	0.976964	0.977376	0.954861	0.945295	0.383464
AIFM1	0.978169	0.97616	0.954849	0.945297	0.383571
COPS5	0.977366	0.976884	0.954773	0.945308	0.384168
HNRNPA2B1	0.978169	0.975953	0.954647	0.945338	0.385853
SERPINI1	0.978437	0.975642	0.954605	0.945344	0.386181
PDGFB	0.983681	0.970415	0.954579	0.945349	0.386452
SKAP2	0.976429	0.977609	0.954566	0.945351	0.386561
HNRNPA3	0.977901	0.976108	0.954537	0.945354	0.386724
PHF13	0.984355	0.969646	0.954476	0.945371	0.387702
SCML1	0.979913	0.97399	0.954426	0.945379	0.388135
EHF	0.976562	0.977247	0.954342	0.945394	0.389008
NDEL1	0.97576	0.977894	0.95419	0.945419	0.390417
FUT7	0.982199	0.971442	0.954149	0.945425	0.390743
AGPAT1	0.980854	0.972728	0.954104	0.945432	0.391177
CA10	0.978035	0.975487	0.954061	0.945441	0.391718
DRG1	0.97884	0.974661	0.954037	0.945448	0.392044
PPAP2B	0.983007	0.970415	0.953925	0.945467	0.393184
FNTA	0.974424	0.978932	0.953895	0.945471	0.393399
NFKBIA	0.980048	0.973243	0.953824	0.945485	0.394266
FCGR1A	0.977499	0.975746	0.953791	0.945489	0.394483
RNF121	0.97683	0.976366	0.953744	0.945504	0.395354
LPGAT1	0.976562	0.976599	0.95371	0.945514	0.395954
SIX1	0.984085	0.969133	0.95371	0.945516	0.396114
GRASP	0.978303	0.974842	0.953691	0.945521	0.396331
PPP1CB	0.975226	0.977739	0.953516	0.945556	0.398393
PPM1A	0.979108	0.973861	0.953516	0.945557	0.398447
NMNAT2	0.980988	0.971956	0.953478	0.945562	0.398827
ATP1B1	0.976295	0.976625	0.953474	0.945565	0.398991
ATG4B	0.984355	0.968621	0.953467	0.945567	0.399155
SEC62	0.976027	0.976858	0.95344	0.945572	0.399427
LRRC25	0.982064	0.970672	0.953262	0.945606	0.401429
ARPC2	0.979913	0.972728	0.953189	0.945618	0.402192
GNAI1	0.979645	0.972986	0.95318	0.945621	0.402301
RPL8	0.98584	0.966832	0.953142	0.94563	0.402898
HOMER1	0.976161	0.976418	0.953142	0.945631	0.402952
INO80B	0.982199	0.970415	0.953141	0.945632	0.403061
PRPS2	0.982199	0.970415	0.953141	0.945633	0.403061
CYC1	0.980316	0.972213	0.953077	0.945642	0.403658
HNRNPA1	0.978035	0.974455	0.953051	0.945648	0.403931
PYGO2	0.980854	0.971442	0.952843	0.945689	0.406589
NAPA	0.978706	0.973501	0.952771	0.945705	0.407402
OTC	0.976161	0.975953	0.952687	0.945713	0.407945
FBXL17	0.972557	0.979555	0.952674	0.945715	0.408053
MCU	0.97576	0.976315	0.952649	0.945718	0.408216
UFD1L	0.977098	0.974971	0.952642	0.945722	0.408489
SMAD7	0.980316	0.971699	0.952572	0.945735	0.409306
LAMP2	0.978706	0.973243	0.952518	0.945744	0.409849
PDLIM4	0.984625	0.967343	0.95247	0.945755	0.410553
OPN5	0.978035	0.973836	0.952446	0.945759	0.410771
RAD23B	0.976295	0.975539	0.952414	0.945764	0.411093
PPME1	0.980048	0.971699	0.952311	0.945781	0.412125
IGBP1	0.978706	0.972986	0.952266	0.945788	0.412615
ZC3H15	0.977098	0.974506	0.952188	0.945794	0.41294
SH3GL2	0.975493	0.976056	0.952136	0.945806	0.413698
STX1A	0.982199	0.96939	0.952133	0.945807	0.413807
TAF5L	0.978035	0.973501	0.952118	0.945811	0.414025
EIF3M	0.976295	0.975177	0.952061	0.945821	0.414677
UGCG	0.975493	0.975979	0.95206	0.945822	0.414732
PPP2R4	0.979913	0.971442	0.951929	0.945846	0.416302
PPP4R2	0.976562	0.974739	0.951893	0.94585	0.416518
FAM131B	0.978571	0.972728	0.951884	0.945854	0.41679
NEGR1	0.977901	0.973243	0.951736	0.945883	0.418689
MAK16	0.974157	0.976962	0.951714	0.945887	0.418854
TNFSF12-TNFSF13	0.975226	0.975875	0.951698	0.945893	0.419286
LSAMP	0.978571	0.972471	0.951632	0.945903	0.419938
IL2RG	0.976964	0.974016	0.951579	0.945912	0.420481
FOSL2	0.983681	0.967343	0.951556	0.945914	0.420696
SLC25A14	0.977901	0.972986	0.951484	0.945929	0.42162
LPPR5	0.977633	0.973243	0.951475	0.945933	0.421891
DTX3	0.983546	0.967343	0.951426	0.945938	0.422216
TTL	0.978571	0.972213	0.95138	0.945945	0.422706
GNB2L1	0.976964	0.97381	0.951377	0.945947	0.42276
ELAVL4	0.980316	0.970415	0.951314	0.945959	0.423577
NSDHL	0.979779	0.970929	0.951295	0.945961	0.423686
PRKAR2B	0.976161	0.974506	0.951275	0.945965	0.423959
STX1B	0.980719	0.969902	0.951202	0.945977	0.424777
MEST	0.976562	0.97399	0.951162	0.945982	0.425104
PCYT1B	0.978706	0.971699	0.951007	0.946002	0.426407
MAP2K1	0.977366	0.972986	0.950963	0.946008	0.426842
HMBS	0.976295	0.974016	0.950927	0.946013	0.427169
CDK4	0.975493	0.974584	0.950699	0.94605	0.429657
CCNJ	0.978303	0.971699	0.950617	0.94606	0.430305
MAPK14	0.976429	0.973501	0.950554	0.946073	0.431173
ST8SIA3	0.980048	0.969902	0.95055	0.946075	0.431282
YBX1	0.978437	0.971442	0.950495	0.946079	0.431662
CRHBP	0.978437	0.971442	0.950495	0.94608	0.431662
RXRG	0.978169	0.971699	0.950486	0.946081	0.431772
ARFIP2	0.977366	0.972471	0.950459	0.946088	0.432205
USF2	0.97683	0.972986	0.950442	0.946092	0.432477
PYGO1	0.979376	0.970415	0.950402	0.946099	0.433017
IL13RA1	0.975226	0.974532	0.950389	0.946104	0.43329
CBWD2	0.974291	0.975462	0.950383	0.946106	0.433399
CEPT1	0.977499	0.972213	0.950338	0.946111	0.433778
TANK	0.976964	0.972728	0.95032	0.946113	0.433941
FTSJ1	0.978437	0.971185	0.950244	0.946123	0.434596
FOXP3	0.978169	0.971442	0.950235	0.946125	0.434705
PCBP3	0.977366	0.972213	0.950208	0.946131	0.435138
AMMECR1L	0.97576	0.973784	0.95018	0.946136	0.435463
MAP2K4	0.974825	0.974713	0.950174	0.946137	0.435572
SPPL3	0.979913	0.969646	0.950169	0.946139	0.43568
CHTOP	0.975092	0.974377	0.950107	0.946147	0.436221
SMS	0.975359	0.974042	0.950041	0.946158	0.437033
MEIS1	0.983141	0.966322	0.950031	0.946161	0.437195
SETD8	0.977633	0.971699	0.949966	0.94617	0.437844
ACTL6A	0.976027	0.973243	0.949912	0.946176	0.438225
HEY1	0.979645	0.969646	0.949909	0.946176	0.43828
PGK1	0.977232	0.971956	0.949826	0.946185	0.438874
TRIB2	0.983141	0.966067	0.94978	0.946189	0.439145
SUV39H2	0.974424	0.974635	0.949708	0.946194	0.439523
AZIN1	0.976562	0.972471	0.949678	0.946202	0.440066
ISY1	0.970429	0.978595	0.949656	0.946208	0.440502
CACNG3	0.978571	0.970415	0.949621	0.946213	0.440882
RMND5A	0.976429	0.972471	0.949548	0.946219	0.441314
E2F1	0.979779	0.969133	0.949537	0.946224	0.441641
CDK6	0.979511	0.96939	0.949527	0.946227	0.441858
MBD3	0.985165	0.963775	0.949477	0.946234	0.442345
FAM199X	0.979645	0.969133	0.949407	0.946244	0.443049
SSBP2	0.97349	0.975177	0.949326	0.946252	0.443701
MBNL2	0.980854	0.967854	0.949323	0.946253	0.443755
GJC1	0.979511	0.969133	0.949276	0.946263	0.444519
ZNF24	0.97349	0.9751	0.949251	0.946268	0.4449
SPOP	0.977901	0.970672	0.949221	0.946272	0.445226
C18orf25	0.977901	0.970672	0.949221	0.946272	0.445226
NAP1L1	0.973891	0.974635	0.949188	0.94628	0.445767
GABPB1	0.973757	0.974739	0.949159	0.946288	0.446311
CFLAR	0.971093	0.977402	0.949149	0.946289	0.44642
GNA12	0.983141	0.965302	0.949028	0.946303	0.447502
FBXO32	0.97683	0.971442	0.948934	0.946314	0.448261
ASB7	0.97576	0.972471	0.948898	0.946319	0.448639
ELAVL1	0.982468	0.965812	0.948879	0.946322	0.448856
ATG4A	0.973891	0.9743	0.948861	0.946324	0.449019
PSMD4	0.978974	0.969133	0.948756	0.946335	0.449776
FBXO5	0.973624	0.974429	0.948727	0.946337	0.449938
WDR5	0.975493	0.972471	0.948638	0.946347	0.450644
TP53	0.97884	0.969133	0.948626	0.946351	0.450914
S100PBP	0.976161	0.971699	0.948535	0.946363	0.45183
PRKACA	0.978974	0.968877	0.948506	0.946369	0.452265
SRSF7	0.971892	0.975927	0.948495	0.946371	0.452374
B4GALT5	0.977901	0.969902	0.948469	0.946374	0.452645
TBL1XR1	0.976295	0.971442	0.948414	0.946382	0.453242
CNTFR	0.979108	0.968621	0.948385	0.946388	0.453621
DNAJB11	0.974958	0.972728	0.948369	0.94639	0.453839
EIF3G	0.98166	0.966067	0.948349	0.946393	0.454056
TBC1D20	0.978437	0.969133	0.948236	0.946409	0.455196
ERP44	0.973891	0.973501	0.948083	0.94643	0.456823
MAPK8	0.973891	0.973501	0.948083	0.946431	0.456823
BGN	0.981122	0.966322	0.94808	0.946431	0.456877
PCBP2	0.977232	0.970159	0.94807	0.946434	0.457041
FAM50A	0.975894	0.971442	0.948024	0.946436	0.45726
NDRG3	0.972824	0.97448	0.947998	0.94644	0.457531
MFAP3L	0.981526	0.965812	0.947969	0.946444	0.457857
MSI1	0.977366	0.969902	0.947949	0.946447	0.45802
GSPT1	0.978303	0.968877	0.947856	0.946457	0.458836
PHF6	0.969764	0.977376	0.947824	0.946462	0.459162
ACTC1	0.982603	0.964538	0.947758	0.946475	0.460135
FBRS	0.981795	0.965302	0.947729	0.946478	0.460458
TARDBP	0.977901	0.969133	0.947717	0.946481	0.460621
UST	0.978303	0.968621	0.947606	0.946498	0.46203
MAPKAPK2	0.976161	0.970672	0.947532	0.946508	0.462678
OPN1LW	0.978974	0.967854	0.947504	0.946513	0.463002
HERPUD2	0.974558	0.972213	0.947478	0.946514	0.463112
RRM2	0.976027	0.970672	0.947402	0.946523	0.463765
BZW2	0.975226	0.971442	0.947375	0.946528	0.464198
FBXW2	0.977499	0.969133	0.947327	0.946535	0.464687
HAUS7	0.978437	0.96811	0.947235	0.946546	0.465556
PELI1	0.978169	0.968366	0.947225	0.946547	0.465664
SLAIN1	0.971759	0.974687	0.94716	0.946555	0.466257
RAE1	0.97309	0.973243	0.947054	0.946568	0.467237
GDA	0.972158	0.974171	0.947048	0.94657	0.467399
CA11	0.975894	0.970415	0.947022	0.946577	0.467943
STARD7	0.982333	0.964029	0.946998	0.94658	0.468265
KCTD1	0.969632	0.976651	0.946992	0.946583	0.468428
LCOR	0.976295	0.969902	0.946911	0.946596	0.469404
HMG20A	0.974691	0.971442	0.946856	0.946603	0.470055
VMP1	0.974691	0.971442	0.946856	0.946604	0.470055
WTAP	0.974424	0.971699	0.946847	0.946607	0.470326
PSMC5	0.978035	0.96811	0.946846	0.946608	0.47038
EED	0.973624	0.972471	0.946821	0.946611	0.470598
SS18	0.972025	0.974068	0.946818	0.946611	0.470652
DMBX1	0.983141	0.963013	0.946778	0.946616	0.471031
TFDP2	0.972291	0.973758	0.946777	0.946618	0.471141
VPS26B	0.981526	0.964538	0.946719	0.946623	0.471628
EDNRA	0.977366	0.968621	0.946697	0.946626	0.471845
PA2G4	0.974958	0.970929	0.946615	0.946636	0.472552
GXYLT1	0.971892	0.97399	0.946613	0.946636	0.472606
GMDS	0.974691	0.971185	0.946606	0.946637	0.47266
MSL3	0.978303	0.967598	0.946605	0.946638	0.472714
UBE2Q1	0.973357	0.972471	0.946561	0.94664	0.472876
NAP1L4	0.972557	0.973243	0.946535	0.946644	0.473201
CSNK2A2	0.972291	0.973501	0.946526	0.946645	0.473309
C7orf60	0.975626	0.970159	0.946512	0.946649	0.47358
ZNF362	0.978974	0.966832	0.946503	0.946649	0.473634
KCTD16	0.978437	0.967343	0.946484	0.946651	0.473796
H2AFY2	0.980719	0.965047	0.94644	0.946657	0.474281
GLUL	0.979913	0.965812	0.946412	0.946664	0.474823
B4GALT6	0.976027	0.969646	0.946401	0.946667	0.475041
PRKAR2A	0.975226	0.970415	0.946374	0.946668	0.47515
TSG101	0.974691	0.970929	0.946356	0.946672	0.475472
GABRA2	0.974424	0.971185	0.946347	0.946674	0.475578
CADM2	0.974157	0.971442	0.946338	0.946675	0.475687
TMEM183A	0.973891	0.971699	0.946329	0.946676	0.475796
BHLHE40	0.981257	0.964284	0.94621	0.946687	0.476713
SEPHS1	0.979108	0.966322	0.946133	0.946699	0.477635
PPP1CA	0.97884	0.966577	0.946124	0.946701	0.477797
EIF4A2	0.974958	0.970415	0.946114	0.946702	0.477904
TIAL1	0.972557	0.972728	0.946034	0.946712	0.478662
EGLN1	0.978437	0.966832	0.945985	0.946723	0.479641
RIMKLB	0.978437	0.966832	0.945985	0.946724	0.479641
LEF1	0.977366	0.967854	0.945947	0.946728	0.479967
BEND4	0.972957	0.972213	0.945922	0.94673	0.480237
BMP2	0.980182	0.965047	0.945922	0.946732	0.480345
MBNL1	0.976027	0.969133	0.945901	0.946737	0.480776
KHDRBS1	0.976696	0.968366	0.945799	0.946754	0.482185
FBL	0.975894	0.969133	0.945771	0.946759	0.48251
NFIL3	0.977633	0.967343	0.945707	0.94677	0.483436
PSMD13	0.972957	0.971956	0.945672	0.946776	0.483925
COPS4	0.973357	0.971442	0.94556	0.946786	0.484738
TRAM2	0.976696	0.96811	0.945549	0.946787	0.484847
TMEM110-MUSTN1	0.975626	0.969133	0.945512	0.946793	0.485279
VPS4A	0.978706	0.966067	0.945495	0.946795	0.485442
TBCEL	0.974291	0.970415	0.945467	0.946796	0.485551
EDA	0.979645	0.965047	0.945403	0.946803	0.48609
CALCRL	0.972824	0.971699	0.945292	0.946812	0.486958
DNAJB14	0.972291	0.972213	0.945275	0.946816	0.487176
UBAP1	0.978169	0.966322	0.945226	0.946823	0.487772
SSBP4	0.973224	0.971185	0.945181	0.946827	0.488152
ACTR3	0.972957	0.971442	0.945172	0.946829	0.488314
RNF165	0.97576	0.968621	0.945142	0.946831	0.488422
SSBP3	0.971359	0.972986	0.945119	0.946832	0.488531
SNX30	0.974958	0.96939	0.945115	0.946834	0.488694
ILKAP	0.977767	0.966577	0.945087	0.946836	0.488964
ARRDC3	0.974157	0.970159	0.945087	0.946838	0.489017
WNT5A	0.981122	0.963267	0.945083	0.946838	0.489072
PAIP1	0.969366	0.974945	0.945079	0.946839	0.489125
SHH	0.980585	0.963775	0.945063	0.946842	0.489343
PSMD6	0.976429	0.967854	0.94504	0.946844	0.489504
FOXF1	0.982872	0.961491	0.945022	0.946846	0.489666
HNRNPH3	0.97096	0.973243	0.94498	0.946851	0.490097
RBBP4	0.97349	0.970672	0.94494	0.946858	0.490693
TRA2B	0.976295	0.967854	0.944911	0.946861	0.490964
SYT14	0.97576	0.968366	0.944892	0.946863	0.49118
NOVA1	0.97576	0.968366	0.944892	0.946864	0.49118
ILF2	0.971626	0.972471	0.944877	0.946865	0.491343
GNAQ	0.974157	0.969902	0.944837	0.946869	0.491666
TCFL5	0.973891	0.970159	0.944828	0.94687	0.491774
TASP1	0.97309	0.970929	0.944801	0.946875	0.492156
SLC30A4	0.976161	0.967854	0.944782	0.946875	0.492209
GNAO1	0.979511	0.964538	0.944775	0.946876	0.492264
RBBP7	0.974558	0.96939	0.944726	0.94688	0.49264
PRCC	0.977098	0.966832	0.94469	0.946884	0.492967
NAMPT	0.973224	0.970672	0.944681	0.946885	0.493075
ATXN7L3	0.974958	0.968877	0.944615	0.946893	0.493724
LMX1A	0.974691	0.969133	0.944606	0.946894	0.493832
SERPING1	0.977767	0.966067	0.944588	0.946898	0.494158
CAMK1D	0.977232	0.966577	0.94457	0.9469	0.494266
LGALS9C	0.976964	0.966832	0.94456	0.946901	0.494373
COPS2	0.969233	0.974506	0.944524	0.946908	0.494968
RBM22	0.975359	0.968366	0.944504	0.946912	0.495293
PSMC1	0.974424	0.969133	0.944347	0.946934	0.497187
GABRA1	0.975626	0.967854	0.944264	0.946941	0.497945
PHF23	0.975626	0.967854	0.944264	0.946943	0.497945
PRMT8	0.977633	0.965812	0.94421	0.946948	0.498431
WDR45	0.976562	0.966832	0.944172	0.946955	0.49903
GNB2	0.979108	0.964284	0.944138	0.946958	0.499245
CSNK1D	0.978035	0.965302	0.944099	0.94696	0.499408
ACTR2	0.970296	0.972986	0.944084	0.946961	0.499516
SLC41A2	0.972291	0.970929	0.944025	0.946968	0.500168
ZRANB2	0.969101	0.974119	0.94402	0.94697	0.500278
ATP6V0D1	0.979242	0.964029	0.944018	0.94697	0.500331
KLF12	0.978974	0.964284	0.944008	0.946973	0.500549
SF3B4	0.975359	0.967854	0.944005	0.946973	0.500657
COPS3	0.971626	0.971442	0.943878	0.946988	0.501902
POFUT1	0.977499	0.965557	0.943831	0.946991	0.502174
WWTR1	0.978437	0.964538	0.94374	0.947003	0.503203
SLC30A10	0.980451	0.962505	0.943689	0.947013	0.50413
PSMC6	0.972691	0.970159	0.943664	0.947019	0.504619
GCM1	0.97576	0.967087	0.943645	0.947022	0.504891
GABRG3	0.978303	0.964538	0.943611	0.947025	0.505217
TGFB3	0.978035	0.964793	0.943601	0.947027	0.505324
ISY1-RAB43	0.968968	0.973784	0.943566	0.947032	0.505808
STK11	0.982603	0.960225	0.943519	0.94704	0.50646
GLA	0.971759	0.970929	0.943508	0.947041	0.506623
MCL1	0.981257	0.961491	0.94347	0.947047	0.50711
TTYH1	0.973757	0.968877	0.943451	0.947051	0.507489
TFAP4	0.979645	0.963013	0.94341	0.947055	0.507814
PIGA	0.977499	0.965047	0.943333	0.947068	0.508955
PRPF38A	0.972025	0.970415	0.943268	0.947073	0.509496
EIF5	0.974558	0.967854	0.94323	0.947078	0.509877
CADM1	0.975493	0.966832	0.943138	0.947085	0.510525
RAB11FIP2	0.975226	0.967087	0.943128	0.947087	0.510741
CCNA2	0.974424	0.967854	0.943101	0.94709	0.511013
PBX1	0.973891	0.968366	0.943082	0.947092	0.511231
WSB1	0.973891	0.968366	0.943082	0.947093	0.511231
PAX5	0.980048	0.962251	0.943052	0.947099	0.511773
GNB1	0.976429	0.965812	0.943046	0.9471	0.51188
PPP2R2A	0.970694	0.971442	0.942974	0.94711	0.512751
GSK3A	0.972424	0.969646	0.942907	0.947117	0.513403
DDX6	0.974691	0.967343	0.942861	0.947121	0.513836
GTF2E1	0.976964	0.965047	0.942816	0.947124	0.514162
LAMP1	0.979779	0.962251	0.942794	0.947126	0.514324
NXF1	0.972025	0.969902	0.942769	0.947128	0.514593
INHBB	0.982064	0.959972	0.942754	0.947131	0.514755
YBX2	0.971492	0.970415	0.942751	0.947131	0.51481
ESRRG	0.977098	0.964793	0.942697	0.947136	0.515244
DUSP6	0.982468	0.959466	0.942645	0.947142	0.515789
RBFOX2	0.974958	0.966832	0.942621	0.947143	0.515842
SRF	0.977767	0.964029	0.942596	0.947145	0.516111
SCHIP1	0.973891	0.967854	0.942584	0.947148	0.516274
CADM3	0.974825	0.966832	0.942492	0.947158	0.517192
CX3CL1	0.979376	0.962251	0.942406	0.947166	0.518006
STK35	0.978303	0.963267	0.942367	0.947171	0.518386
GDF6	0.981391	0.960225	0.942356	0.947172	0.518493
GDI2	0.973357	0.96811	0.942317	0.947175	0.518872
SMAP1	0.972291	0.969133	0.94228	0.947178	0.519089
ZBTB44	0.974558	0.966832	0.942234	0.947181	0.51936
KLHDC3	0.977633	0.963775	0.942219	0.947183	0.51963
PTPN2	0.969101	0.972213	0.942173	0.947189	0.520064
NPTN	0.977767	0.963521	0.942099	0.947199	0.520984
DNAJA2	0.973624	0.967598	0.942077	0.947203	0.521364
RCL1	0.972557	0.968621	0.94204	0.947207	0.521744
STK38L	0.972025	0.969133	0.942022	0.947209	0.521907
EIF2S3	0.974558	0.966577	0.941985	0.947214	0.522393
TGFB2	0.977366	0.963775	0.941961	0.947218	0.52277
ETV1	0.977098	0.964029	0.941951	0.947219	0.522878
ITPK1	0.978571	0.962505	0.94188	0.947231	0.524017
ATF7	0.977767	0.963267	0.941851	0.947237	0.524614
RCOR1	0.970296	0.970672	0.941839	0.94724	0.524777
YY1	0.980316	0.960731	0.94182	0.947241	0.524994
PLEKHO1	0.976429	0.964538	0.941803	0.947244	0.525265
CALR	0.977098	0.963775	0.941702	0.947253	0.52613
LSM14B	0.978571	0.962251	0.941632	0.94726	0.526831
GLRA2	0.974424	0.966322	0.941607	0.947264	0.527212
KAT8	0.973624	0.967087	0.941579	0.947266	0.52743
RBM17	0.972025	0.968621	0.941524	0.947272	0.527972
CCNK	0.972957	0.967598	0.941432	0.94728	0.528726
ZNF654	0.97576	0.964793	0.941406	0.947283	0.528942
DLST	0.975226	0.965302	0.941387	0.947284	0.529105
FNBP1L	0.973624	0.966832	0.941331	0.947291	0.529703
SLC29A1	0.976696	0.963775	0.941316	0.947291	0.529756
YTHDF3	0.976161	0.964284	0.941296	0.947293	0.529919
NAA30	0.979242	0.961237	0.941284	0.947295	0.530189
WDR18	0.979242	0.961237	0.941284	0.947296	0.530189
CHMP7	0.974024	0.966322	0.941221	0.947304	0.531003
EEF1G	0.975493	0.964793	0.941148	0.947308	0.531383
PAPD5	0.971892	0.968366	0.941146	0.947309	0.531436
NR2E1	0.977767	0.962505	0.941106	0.947313	0.531924
ZBTB47	0.972824	0.967343	0.941054	0.947318	0.532304
WNT3	0.981795	0.958456	0.941008	0.947321	0.532576
SKP2	0.971226	0.968877	0.940999	0.947323	0.532739
TFAP2D	0.978169	0.961998	0.940997	0.947323	0.532792
GABRA5	0.979645	0.960478	0.940927	0.947329	0.533335
ACTB	0.982737	0.957448	0.94092	0.947329	0.53339
TRMT5	0.972158	0.967854	0.940907	0.947332	0.533607
ZNF398	0.978571	0.961491	0.940887	0.947333	0.533824
HMGCS1	0.97309	0.966832	0.940815	0.947342	0.53469
MPP1	0.97309	0.966832	0.940815	0.947343	0.53469
LCP2	0.976429	0.963521	0.940809	0.947343	0.534851
TFAP2C	0.976429	0.963521	0.940809	0.947344	0.534851
GDF11	0.978706	0.961237	0.940768	0.947348	0.535174
ODC1	0.977098	0.962759	0.94071	0.947361	0.536421
IDH3G	0.979913	0.959972	0.940689	0.947365	0.5368
GNAL	0.97309	0.966577	0.940567	0.947376	0.537941
SMARCE1	0.972557	0.967087	0.940548	0.947379	0.538212
NR2F2	0.982064	0.9577	0.940523	0.947382	0.538482
NFIB	0.969897	0.969646	0.940457	0.947387	0.539022
PRMT1	0.978303	0.961237	0.940382	0.947394	0.539669
PRKAR1A	0.970827	0.968621	0.940364	0.947395	0.539885
XIAP	0.970827	0.968621	0.940364	0.947396	0.539885
ING3	0.96698	0.972471	0.940359	0.947397	0.539993
MEX3C	0.973891	0.965557	0.940347	0.947398	0.540155
PRR5	0.980585	0.958961	0.940343	0.947399	0.54021
MKRN1	0.972557	0.966832	0.9403	0.947402	0.540481
EEF1A1	0.975894	0.963521	0.940294	0.947403	0.54059
DDI2	0.973224	0.966067	0.940199	0.947413	0.541675
IRF6	0.973224	0.966067	0.940199	0.947414	0.541675
RPL3	0.976295	0.963013	0.940185	0.947415	0.541782
ST3GAL2	0.978035	0.961237	0.940124	0.947421	0.542327
MGAT2	0.977767	0.961491	0.940114	0.947421	0.542381
ELF3	0.973624	0.965557	0.940089	0.947422	0.54249
CCZ1	0.972025	0.967087	0.940033	0.947429	0.543251
F9	0.970163	0.968877	0.939969	0.947436	0.543845
PKNOX1	0.97349	0.965557	0.93996	0.947438	0.544063
ARRB1	0.976429	0.962505	0.939818	0.94745	0.545201
MDM2	0.968702	0.970159	0.939795	0.947452	0.545473
PELI2	0.975626	0.963267	0.939789	0.947453	0.545634
SERPINC1	0.974291	0.964538	0.939741	0.94746	0.546338
STAU2	0.970694	0.96811	0.939739	0.947462	0.546447
HEXIM1	0.980451	0.958456	0.939719	0.947463	0.546555
MDM4	0.969897	0.968877	0.939711	0.947463	0.546664
AGPAT3	0.976295	0.962505	0.939689	0.947467	0.546935
HMBOX1	0.96857	0.970159	0.939666	0.947469	0.54715
LHX2	0.98193	0.956944	0.939652	0.947471	0.547367
SMARCB1	0.974691	0.964029	0.939631	0.947474	0.547638
TFDP1	0.977499	0.961237	0.939609	0.947477	0.547965
ETF1	0.97003	0.968621	0.939592	0.947478	0.548127
TRMT12	0.973357	0.965302	0.939584	0.94748	0.548236
E2F2	0.976429	0.962251	0.93957	0.947482	0.548616
HIAT1	0.968702	0.969902	0.939547	0.947485	0.54878
AHCY	0.978706	0.959972	0.93953	0.947487	0.548997
PSEN1	0.971759	0.966832	0.939527	0.947488	0.549051
CLP1	0.974291	0.964284	0.939493	0.94749	0.549321
SYT7	0.977098	0.961491	0.939471	0.947492	0.549539
TOX3	0.975226	0.963267	0.939402	0.947499	0.550239
SNRNP70	0.971359	0.967087	0.939389	0.947503	0.550615
CCT6A	0.971093	0.967343	0.93938	0.947504	0.550722
CSTF1	0.976161	0.962251	0.939312	0.94751	0.551267
TRIP13	0.972291	0.966067	0.939298	0.947512	0.551591
BMP7	0.978035	0.960225	0.939134	0.947528	0.553106
RING1	0.977232	0.960984	0.939104	0.947532	0.553484
GABPA	0.969499	0.968621	0.939077	0.947534	0.553701
MBTPS2	0.971492	0.966577	0.939022	0.947537	0.554079
NLK	0.972158	0.965812	0.938921	0.947545	0.554891
VEZF1	0.973624	0.964284	0.93885	0.947553	0.555699
DAZAP1	0.972291	0.965557	0.938802	0.947557	0.55613
TMEM39A	0.972025	0.965812	0.938793	0.947559	0.5564
DCTN4	0.970429	0.967343	0.938737	0.947563	0.556777
C17orf85	0.970163	0.967598	0.938728	0.947564	0.556831
CYTH1	0.971892	0.965812	0.938664	0.947567	0.557153
CTDSPL2	0.969764	0.967854	0.93859	0.947575	0.557967
MBTD1	0.964599	0.972986	0.938541	0.947579	0.558345
SLC38A2	0.97096	0.966577	0.938508	0.947583	0.558827
TBX1	0.97683	0.960731	0.938471	0.94759	0.559478
EVL	0.972957	0.964538	0.938454	0.947591	0.559639
SRP54	0.969366	0.96811	0.938453	0.947592	0.559748
CFP	0.969366	0.96811	0.938453	0.947592	0.559748
HDAC2	0.969101	0.968366	0.938444	0.947593	0.559855
SLC38A5	0.972824	0.964538	0.938326	0.947603	0.560939
WDR13	0.979242	0.958204	0.938314	0.947604	0.560991
KRT31	0.977901	0.959466	0.938264	0.947607	0.56137
CERS2	0.97096	0.966322	0.93826	0.947608	0.561424
TUBB3	0.983815	0.953678	0.938243	0.947608	0.561479
MOSPD2	0.970429	0.966832	0.938242	0.947609	0.561533
LRCH2	0.964203	0.972986	0.938156	0.947616	0.562232
ADRM1	0.978303	0.958961	0.938155	0.947617	0.562341
PDHA1	0.971359	0.965812	0.93815	0.947618	0.56245
KATNAL1	0.971093	0.966067	0.938141	0.947619	0.562559
CCT2	0.970827	0.966322	0.938132	0.947619	0.562668
POLD3	0.96645	0.970672	0.938106	0.947623	0.562994
ZNF704	0.975092	0.961998	0.938036	0.947629	0.563645
FOXN3	0.977098	0.959972	0.937987	0.947632	0.563968
BMP4	0.978303	0.958709	0.937908	0.947638	0.564672
PIP4K2B	0.978303	0.958709	0.937908	0.947639	0.564672
CELF1	0.971359	0.965557	0.937903	0.94764	0.564781
RNF8	0.967509	0.96939	0.937894	0.947641	0.56489
SENP3	0.97309	0.963775	0.93784	0.947646	0.565542
KLHDC10	0.968702	0.96811	0.93781	0.947649	0.565758
FKBP8	0.978437	0.958456	0.93779	0.947651	0.565975
PAFAH1B1	0.967907	0.968877	0.937783	0.947651	0.566029
THRB	0.974291	0.962505	0.93776	0.947652	0.566137
RIC8B	0.970694	0.966067	0.937756	0.947653	0.56619
PSMC2	0.970429	0.966322	0.937746	0.947654	0.566352
CDC37	0.977098	0.959719	0.937739	0.947657	0.566568
PODXL2	0.97349	0.963267	0.937731	0.947657	0.56662
ACVR2A	0.969632	0.967087	0.937719	0.94766	0.566946
DPF1	0.972424	0.964284	0.937693	0.947663	0.56727
PSMD11	0.968039	0.968621	0.937664	0.947665	0.567486
CNOT6L	0.974958	0.961744	0.937661	0.947666	0.567594
SLC2A14	0.974691	0.961998	0.937651	0.947667	0.567648
BECN1	0.970827	0.965812	0.937636	0.947668	0.567755
LRRTM2	0.973891	0.962759	0.937622	0.947668	0.56781
PKNOX2	0.972824	0.963775	0.937583	0.947672	0.568241
NAF1	0.972691	0.963775	0.937455	0.947682	0.569218
PPP2R5E	0.968835	0.967598	0.937443	0.947682	0.569271
HNRNPH1	0.970562	0.965812	0.93738	0.947689	0.570031
SQLE	0.973624	0.962759	0.937365	0.94769	0.570193
ACTR1A	0.97003	0.966322	0.937361	0.947691	0.570302
CADM4	0.979779	0.956692	0.937347	0.947691	0.570356
SHOC2	0.972291	0.964029	0.937317	0.947693	0.570574
ACTR3B	0.971492	0.964793	0.937289	0.947696	0.570953
CCT7	0.974825	0.961491	0.937285	0.947698	0.57106
WARS	0.974558	0.961744	0.937275	0.947699	0.571169
KPNA4	0.967112	0.969133	0.937261	0.947701	0.57133
ALDH1A1	0.970694	0.965557	0.937261	0.947701	0.571385
FBXL20	0.966847	0.96939	0.937252	0.947703	0.571548
DNAJC7	0.972158	0.964029	0.937189	0.947707	0.571978
NAB2	0.974157	0.961998	0.937137	0.947713	0.572681
CSNK1G1	0.966715	0.96939	0.937123	0.947716	0.572953
DDX39B	0.973357	0.962759	0.937108	0.947718	0.573223
CDC25A	0.969233	0.966832	0.937086	0.947721	0.573549
ARGLU1	0.972557	0.963521	0.937079	0.947722	0.573604
GNA11	0.981526	0.954682	0.937045	0.947726	0.574089
PPP2R2B	0.974024	0.961998	0.937009	0.94773	0.574632
BMPR1B	0.970429	0.965557	0.937004	0.947731	0.574686
OTUD5	0.970163	0.965812	0.936995	0.947732	0.574796
POU2F2	0.975226	0.960731	0.936929	0.947739	0.575555
LMNB1	0.969499	0.966322	0.936848	0.947746	0.576256
NFIX	0.980719	0.955184	0.936767	0.947749	0.576687
SLC38A1	0.970694	0.965047	0.936766	0.94775	0.576742
LHX9	0.97683	0.958961	0.936742	0.947751	0.576905
TGFBR1	0.969897	0.965812	0.936738	0.947752	0.576959
RBM14-RBM4	0.983007	0.952927	0.936733	0.947752	0.577014
FKBP4	0.972158	0.963521	0.936695	0.947756	0.577446
RBMX	0.971892	0.963775	0.936685	0.947757	0.577552
AKT3	0.967244	0.968366	0.936646	0.947762	0.578093
SOCS7	0.96698	0.968621	0.936637	0.947763	0.578202
MEIS2	0.973624	0.961998	0.936624	0.947764	0.578311
PPARD	0.979242	0.956441	0.936587	0.947766	0.578528
CORO1C	0.972557	0.963013	0.936585	0.947767	0.578582
ANGPT1	0.968968	0.966577	0.936582	0.947767	0.578689
CRLF3	0.968968	0.966577	0.936582	0.947768	0.578689
PDE7B	0.968437	0.967087	0.936564	0.947769	0.578906
EEF1A2	0.979376	0.956189	0.936469	0.947773	0.579339
SPATS2L	0.976429	0.958961	0.936357	0.947781	0.580206
SRSF6	0.971492	0.963775	0.9363	0.947785	0.580637
FZD4	0.977633	0.9577	0.936279	0.947787	0.5808
RASGEF1A	0.97349	0.961744	0.936249	0.94779	0.581125
WASL	0.968835	0.966322	0.936206	0.947792	0.581393
METAP2	0.96857	0.966577	0.936197	0.947795	0.581663
IKZF2	0.971093	0.964029	0.936162	0.947795	0.581773
MAP2K7	0.977232	0.957952	0.936141	0.947798	0.582046
ACBD3	0.966715	0.968366	0.936133	0.947799	0.582154
RARB	0.968172	0.966832	0.93606	0.947803	0.582586
TFAP2A	0.977901	0.957196	0.936043	0.947805	0.582803
EXOC3L2	0.977901	0.957196	0.936043	0.947805	0.582803
GABRG2	0.969897	0.965047	0.935997	0.947807	0.582965
NR5A1	0.97884	0.956189	0.935956	0.947808	0.583074
TBX22	0.972158	0.962759	0.935954	0.947808	0.583128
RTN4RL2	0.977767	0.957196	0.935915	0.947812	0.583506
TFEB	0.974157	0.960731	0.935903	0.947813	0.583614
RUVBL1	0.970562	0.964284	0.935897	0.947813	0.583669
SMAD2	0.966715	0.96811	0.935886	0.947816	0.58394
MEGF9	0.976696	0.958204	0.935874	0.947817	0.584154
SMU1	0.969499	0.965302	0.935859	0.947818	0.584263
GMEB1	0.972824	0.961998	0.935854	0.947819	0.584371
NR6A1	0.969897	0.964793	0.93575	0.947823	0.584804
MYCN	0.979645	0.955184	0.935741	0.947825	0.585126
RSRC2	0.966053	0.968621	0.93574	0.947827	0.585179
CHRM1	0.978571	0.956189	0.935699	0.94783	0.585503
LOX	0.974157	0.960478	0.935657	0.947832	0.585775
GPBP1	0.969233	0.965302	0.935603	0.947833	0.585938
UBXN7	0.971492	0.963013	0.93556	0.947837	0.586313
GSK3B	0.966583	0.967854	0.935511	0.94784	0.586694
CBLL1	0.969632	0.964793	0.935493	0.947842	0.586854
OSGIN2	0.969101	0.965302	0.935475	0.947843	0.586963
TRABD	0.978571	0.955938	0.935453	0.947844	0.587125
SNX2	0.967509	0.966832	0.935419	0.947848	0.58756
NRG1	0.97003	0.964284	0.935384	0.947851	0.58783
SLC30A1	0.978169	0.956189	0.935315	0.947855	0.588316
PACSIN1	0.974825	0.959466	0.935312	0.947856	0.588424
GLIS2	0.977633	0.956692	0.935294	0.947857	0.588586
RNF38	0.966053	0.96811	0.935246	0.94786	0.588911
DCP1A	0.972691	0.961491	0.935233	0.947862	0.58918
FAR2	0.972424	0.961744	0.935223	0.947863	0.589235
FADS2	0.972158	0.961998	0.935214	0.947864	0.589507
PAX8	0.973624	0.960478	0.935144	0.947872	0.590212
TUBG1	0.975359	0.958709	0.935085	0.947874	0.590481
ABI2	0.970694	0.963267	0.935038	0.947878	0.590971
AJAP1	0.978303	0.955686	0.934951	0.947883	0.591511
RARG	0.974157	0.959719	0.934918	0.947885	0.591727
HP1BP3	0.969764	0.964029	0.934881	0.947889	0.592105
ELF2	0.969233	0.964538	0.934862	0.947889	0.592159
CSNK1G3	0.964335	0.96939	0.934817	0.947894	0.592644
CELF5	0.976027	0.9577	0.934741	0.947897	0.593077
LPCAT3	0.968835	0.964793	0.934725	0.947898	0.593132
MLLT3	0.972158	0.961491	0.934721	0.947898	0.593185
UBXN4	0.96857	0.965047	0.934716	0.947899	0.593239
PSMD12	0.967774	0.965812	0.934688	0.947901	0.593455
FEZF2	0.980854	0.952927	0.934682	0.947901	0.593509
CSNK2A1	0.963676	0.969902	0.934671	0.947903	0.593725
TBX21	0.97309	0.960478	0.934632	0.947906	0.593995
FBXO33	0.97096	0.962505	0.934554	0.947915	0.595077
UTP15	0.967377	0.966067	0.934551	0.947916	0.595241
HSF2	0.967377	0.966067	0.934551	0.947917	0.595241
EIF4A1	0.968835	0.964538	0.934478	0.947923	0.595994
PDIA3	0.971359	0.961998	0.934446	0.947927	0.596372
SEC61A2	0.967244	0.966067	0.934423	0.947928	0.596481
YAP1	0.970296	0.963013	0.934407	0.947929	0.596644
PI4K2A	0.973624	0.959719	0.934405	0.94793	0.59675
API5	0.965921	0.967343	0.934377	0.947932	0.597075
GABRB3	0.972025	0.961237	0.934347	0.947934	0.597292
BACE2	0.974291	0.958961	0.934307	0.947941	0.597938
FRS2	0.970694	0.962505	0.934298	0.947941	0.598046
TXLNG	0.966847	0.966322	0.934285	0.947944	0.598315
CSF1	0.97349	0.959719	0.934277	0.947945	0.598423
HOXA3	0.979645	0.953678	0.934266	0.947947	0.598693
ARC	0.979645	0.953678	0.934266	0.947947	0.598693
HDAC3	0.969632	0.963521	0.93426	0.947948	0.598746
PPP2R5B	0.972957	0.960225	0.934258	0.947948	0.5988
WEE1	0.964732	0.968366	0.934213	0.947953	0.599395
CPE	0.971626	0.961491	0.934209	0.947954	0.599504
UAP1	0.967244	0.965812	0.934176	0.947956	0.599666
HTR1A	0.979779	0.953428	0.934148	0.947957	0.599774
LYN	0.969233	0.963775	0.934123	0.947959	0.599991
ERG	0.975092	0.957952	0.934091	0.947961	0.600259
PAX6	0.968172	0.964793	0.934085	0.947962	0.600368
WASF2	0.972957	0.959972	0.934012	0.947966	0.600961
STAM	0.968835	0.964029	0.933986	0.947969	0.601342
EIF4A3	0.971626	0.961237	0.933963	0.947972	0.60156
SESN3	0.969233	0.963521	0.933877	0.947977	0.602156
PRPF31	0.975626	0.957196	0.933866	0.947977	0.60221
IRF4	0.972291	0.960478	0.933864	0.947978	0.602264
RARA	0.975359	0.957448	0.933855	0.947979	0.602373
MAZ	0.977901	0.954933	0.93383	0.947981	0.602641
P4HB	0.973757	0.958961	0.933795	0.947985	0.603127
HAS2	0.969632	0.963013	0.933768	0.947986	0.603235
TNFRSF1A	0.97576	0.956944	0.933748	0.947987	0.603342
NUP54	0.964996	0.967598	0.933728	0.947988	0.603452
TUBB4B	0.980316	0.952426	0.933679	0.94799	0.603665
HSPD1	0.970562	0.961998	0.933678	0.947991	0.603828
ATG13	0.970562	0.961998	0.933678	0.947992	0.603828
G3BP1	0.96698	0.965557	0.933674	0.947992	0.603935
JPH4	0.972025	0.960478	0.933608	0.947997	0.604477
SOX10	0.979511	0.952927	0.933402	0.948009	0.605884
CS	0.964599	0.967598	0.933345	0.948015	0.606585
USP14	0.964599	0.967598	0.933345	0.948015	0.606585
ZBTB2	0.974024	0.958204	0.933314	0.948019	0.606966
HSPA14	0.966053	0.966067	0.933272	0.948022	0.607345
RPL4	0.969101	0.963013	0.933256	0.948023	0.607453
UBA3	0.961962	0.970159	0.933256	0.948023	0.607508
PPAT	0.968835	0.963267	0.933247	0.948024	0.607562
PGD	0.971093	0.960984	0.933205	0.948025	0.607831
DNAJC3	0.966186	0.965812	0.933153	0.948029	0.608209
PRPF19	0.971492	0.960478	0.933097	0.948034	0.608749
ATP5B	0.974558	0.957448	0.933088	0.948035	0.608856
IQCJ-SCHIP1	0.967377	0.964538	0.933072	0.948036	0.609126
PPM1G	0.966847	0.965047	0.933053	0.948037	0.609234
SPRYD3	0.972424	0.959466	0.933008	0.948041	0.609614
MPP6	0.96645	0.965302	0.932916	0.948048	0.610428
EXOC5	0.970163	0.961491	0.932803	0.948055	0.611294
RXRB	0.972158	0.959466	0.932753	0.948059	0.611781
CCT8	0.968039	0.963521	0.932726	0.948061	0.611999
SEC61A1	0.969764	0.961744	0.932665	0.948066	0.612646
LGI1	0.969499	0.961998	0.932656	0.948067	0.612755
TCP1	0.970429	0.960984	0.932567	0.948072	0.613294
DPF2	0.966847	0.964538	0.932561	0.948072	0.613348
ACVR1	0.969897	0.961491	0.932547	0.948074	0.613562
SUV39H1	0.976295	0.955184	0.932541	0.948075	0.613669
BLNK	0.964732	0.966577	0.932487	0.948079	0.614205
MIER3	0.967774	0.963521	0.932471	0.948081	0.614367
TTYH3	0.973357	0.957952	0.932429	0.948084	0.614746
SLC16A2	0.975359	0.955938	0.932382	0.948088	0.615284
AP2M1	0.971226	0.959972	0.93235	0.948092	0.615712
MAOA	0.969897	0.961237	0.932301	0.948093	0.615821
CBX8	0.972424	0.958709	0.932272	0.948096	0.616147
FAF2	0.967509	0.963521	0.932216	0.948098	0.616471
SNAP91	0.970296	0.960731	0.932193	0.9481	0.616687
STK40	0.976429	0.954682	0.932178	0.948102	0.616956
PWWP2A	0.974558	0.956441	0.932107	0.948106	0.617442
MAOB	0.967377	0.963521	0.932088	0.948107	0.617604
WAS	0.967377	0.963521	0.932088	0.948108	0.617604
PAK2	0.967509	0.963267	0.93197	0.948115	0.618522
BACE1	0.970827	0.959972	0.931967	0.948116	0.61863
ETS2	0.970827	0.959972	0.931967	0.948116	0.61863
PORCN	0.970296	0.960478	0.931948	0.948118	0.618793
ACTL6B	0.968968	0.961744	0.931899	0.94812	0.619063
ALDH1A3	0.972291	0.958456	0.931899	0.948121	0.61917
PSAP	0.971492	0.959214	0.931869	0.948123	0.619441
RENBP	0.971492	0.959214	0.931869	0.948123	0.619441
NCF1	0.976295	0.954431	0.931806	0.948125	0.619711
FOXO1	0.971892	0.958709	0.931761	0.94813	0.620251
DDX19A	0.968305	0.962251	0.931752	0.94813	0.620304
WIPF1	0.974691	0.955938	0.931744	0.948131	0.620357
SLC38A4	0.96698	0.963521	0.931705	0.948134	0.62079
GDI1	0.972824	0.9577	0.931673	0.948137	0.621062
TRAF6	0.969499	0.960984	0.931673	0.948137	0.621116
PPP3CB	0.965392	0.965047	0.931649	0.948138	0.621225
CSNK1G2	0.978437	0.952176	0.931645	0.948139	0.621334
KPNA1	0.964864	0.965557	0.931631	0.94814	0.621496
FBLN5	0.969897	0.960478	0.931565	0.948144	0.621984
PAK3	0.966318	0.964029	0.931559	0.948145	0.622039
PTBP2	0.966053	0.964284	0.931549	0.948145	0.622093
IL10RA	0.971093	0.959214	0.931486	0.94815	0.622633
FAM126B	0.967244	0.963013	0.931469	0.948151	0.622742
KLF4	0.976161	0.95418	0.931433	0.948154	0.623173
SGK1	0.968968	0.961237	0.931408	0.948157	0.623553
NACC1	0.977633	0.952676	0.931368	0.948159	0.623823
NFIA	0.966053	0.964029	0.931304	0.948162	0.624146
HDAC1	0.968835	0.961237	0.931281	0.948163	0.624309
CAMKV	0.971892	0.958204	0.931271	0.948164	0.624364
EYA3	0.964996	0.965047	0.931266	0.948164	0.624418
AGFG1	0.968305	0.961744	0.931261	0.948166	0.624632
RBBP5	0.963939	0.966067	0.93123	0.948168	0.624901
ADAD1	0.967244	0.962759	0.931223	0.948169	0.624955
GABRB2	0.970562	0.959466	0.931221	0.948169	0.62501
PDLIM7	0.972824	0.957196	0.931183	0.94817	0.625173
CDKN2AIP	0.971226	0.958709	0.931123	0.948173	0.625497
NKAP	0.967377	0.962505	0.931105	0.948175	0.62571
STK39	0.963807	0.966067	0.931102	0.948175	0.625764
GPKOW	0.972691	0.957196	0.931056	0.948179	0.626251
FBXL16	0.978571	0.951426	0.931038	0.948181	0.626465
USP3	0.968039	0.961744	0.931006	0.948184	0.626845
CREB5	0.971359	0.958456	0.931006	0.948185	0.626898
UPF3B	0.964467	0.965302	0.931002	0.948185	0.626952
G3BP2	0.967774	0.961998	0.930997	0.948186	0.62706
SNX1	0.967774	0.961998	0.930997	0.948186	0.62706
DYNC1LI1	0.967244	0.962505	0.930978	0.948188	0.627331
NONO	0.967244	0.962505	0.930978	0.948188	0.627331
WASF1	0.969764	0.959972	0.930947	0.948191	0.627708
PPP2R5C	0.966583	0.963013	0.930831	0.948198	0.628521
IKZF3	0.972691	0.956944	0.930811	0.948199	0.628684
CDK8	0.962225	0.967343	0.930802	0.9482	0.628739
GABRA4	0.970827	0.958709	0.930741	0.948205	0.629392
MAP3K2	0.968968	0.960478	0.930672	0.948208	0.629772
OXSR1	0.963016	0.966322	0.930583	0.948214	0.630474
MIER1	0.961962	0.967343	0.930547	0.948215	0.630637
ATL1	0.96526	0.964029	0.930539	0.948216	0.630799
CELF2	0.971359	0.957952	0.930516	0.948217	0.631017
PRPF39	0.96698	0.962251	0.930478	0.94822	0.631288
ARHGEF9	0.97003	0.959214	0.930466	0.948221	0.631397
ASH2L	0.966186	0.963013	0.930449	0.948223	0.63156
MNT	0.975626	0.953678	0.930434	0.948224	0.631721
PSIP1	0.962094	0.967087	0.930429	0.948225	0.631884
OLFM1	0.974825	0.954431	0.930403	0.948227	0.632154
CORO1A	0.97576	0.953428	0.930317	0.948233	0.632806
RBFOX1	0.971359	0.9577	0.930271	0.948234	0.633078
GPC3	0.967509	0.961491	0.930251	0.948235	0.633186
NTRK2	0.969764	0.959214	0.930211	0.948238	0.63351
HPN	0.972291	0.956692	0.930183	0.948239	0.633672
PRLR	0.968702	0.960225	0.930172	0.948241	0.633834
ARID5A	0.974558	0.954431	0.930148	0.948242	0.633996
ORC2	0.964071	0.964793	0.930129	0.948243	0.634105
CDK19	0.967112	0.961744	0.930114	0.948243	0.63416
PPP3CA	0.966318	0.962505	0.930086	0.948245	0.634378
TFAP2B	0.975226	0.953678	0.930051	0.948246	0.63454
SLC1A2	0.971626	0.957196	0.930036	0.948248	0.634757
ATP5A1	0.971359	0.957448	0.930026	0.948249	0.63481
YTHDF2	0.970827	0.957952	0.930006	0.94825	0.635028
TBX5	0.973624	0.955184	0.92999	0.948251	0.635137
IL2RB	0.968702	0.959972	0.929927	0.948258	0.635948
SMAD4	0.968437	0.960225	0.929918	0.94826	0.636165
FBXO3	0.964864	0.963775	0.929911	0.948261	0.636328
SLC18A2	0.970694	0.957952	0.929879	0.948263	0.636545
SYNCRIP	0.967112	0.961491	0.929869	0.948263	0.636599
CHRM4	0.979108	0.949679	0.929839	0.948266	0.636977
ALAS2	0.971093	0.957448	0.929771	0.94827	0.637463
UBQLN1	0.967244	0.961237	0.929752	0.948271	0.637625
CBX2	0.976696	0.951926	0.929743	0.948272	0.63768
IRF8	0.97309	0.955435	0.929725	0.948273	0.637788
KCNJ3	0.972824	0.955686	0.929714	0.948273	0.637897
CDK17	0.962357	0.966067	0.929701	0.948276	0.638166
WASF3	0.974291	0.95418	0.929649	0.948278	0.638491
OLFM2	0.978303	0.950178	0.929562	0.948282	0.638923
HS6ST1	0.980585	0.947937	0.929533	0.948286	0.639464
ZNF652	0.974157	0.95418	0.929521	0.948287	0.639571
C17orf104	0.963412	0.964793	0.929493	0.948289	0.639842
NRF1	0.972025	0.956189	0.92944	0.948294	0.640383
ZNF605	0.967642	0.960478	0.929399	0.948297	0.640815
HNRNPK	0.967377	0.960731	0.929389	0.948298	0.640976
SLC2A13	0.967112	0.960984	0.929379	0.948298	0.64103
GABRB1	0.96857	0.959466	0.92931	0.948302	0.641517
ALCAM	0.96645	0.961491	0.929233	0.948305	0.641839
GATA2	0.975626	0.952426	0.929212	0.948307	0.642055
ETV6	0.968968	0.958961	0.929203	0.948308	0.642219
CPSF7	0.969632	0.958204	0.929105	0.948312	0.64276
CNOT2	0.964071	0.963521	0.928903	0.948323	0.644057
RXRA	0.976562	0.951176	0.928883	0.948325	0.644329
PRDM14	0.971093	0.956441	0.928793	0.94833	0.645087
GABRD	0.976429	0.951176	0.928756	0.948331	0.645142
GTF2H1	0.963148	0.964284	0.928748	0.948332	0.645197
CDYL	0.97309	0.954431	0.928747	0.948332	0.645305
SNIP1	0.972025	0.955435	0.928706	0.948336	0.645737
SMARCD2	0.967112	0.960225	0.928645	0.94834	0.646222
EFHC2	0.969897	0.957448	0.928626	0.948341	0.646383
RUNX2	0.972691	0.954682	0.92861	0.948342	0.6466
LONRF1	0.960646	0.966577	0.928538	0.948345	0.646868
CCDC6	0.969764	0.957448	0.928499	0.94835	0.647462
PIAS2	0.965921	0.961237	0.928479	0.948351	0.647677
SOX13	0.973224	0.953929	0.928386	0.948355	0.648111
SREK1	0.967244	0.959719	0.928283	0.94836	0.648761
TM9SF3	0.963676	0.963267	0.928277	0.94836	0.648815
KLHL9	0.968968	0.957952	0.928225	0.948362	0.649086
ARID3B	0.971492	0.955435	0.928198	0.948365	0.649357
MEF2D	0.969632	0.957196	0.928127	0.948368	0.649736
SLC2A1	0.975493	0.951426	0.928109	0.948368	0.649845
DCAF10	0.966583	0.959972	0.927892	0.948379	0.651196
REL	0.966318	0.960225	0.927882	0.94838	0.65141
ADCK5	0.972424	0.95418	0.927868	0.948382	0.651572
SLC40A1	0.965524	0.960984	0.927854	0.948383	0.651679
LPCAT4	0.963939	0.962505	0.927797	0.948386	0.652113
HNRNPL	0.97003	0.956441	0.927776	0.948388	0.652327
TMEM108	0.972824	0.953678	0.927761	0.948389	0.652488
SUFU	0.969499	0.956944	0.927756	0.94839	0.652597
TBC1D10B	0.966186	0.960225	0.927755	0.948391	0.652651
CSRNP2	0.972025	0.954431	0.92773	0.948392	0.652813
CCNL1	0.965789	0.960478	0.927619	0.9484	0.653841
CREBRF	0.965789	0.960478	0.927619	0.9484	0.653841
PLRG1	0.962225	0.964029	0.927614	0.9484	0.653894
SPATS2	0.964996	0.961237	0.92759	0.948402	0.654111
KRT6A	0.973891	0.952426	0.927559	0.948405	0.654543
TXLNA	0.970562	0.955686	0.927552	0.948406	0.654596
RBPJ	0.96012	0.966067	0.92754	0.948408	0.654867
SMARCD1	0.963148	0.963013	0.927524	0.94841	0.655138
KCNN1	0.979913	0.946447	0.927436	0.948413	0.655517
NDUFS2	0.963412	0.962505	0.927289	0.948421	0.6567
SF3A3	0.959858	0.966067	0.927286	0.948422	0.656754
NPLOC4	0.97309	0.952927	0.927284	0.948423	0.656809
ONECUT2	0.978974	0.947192	0.927276	0.948423	0.656861
LRRC4C	0.972824	0.953177	0.927274	0.948424	0.656915
SLC25A25	0.97349	0.952426	0.927178	0.948431	0.657887
VIM	0.974691	0.951176	0.927103	0.948434	0.658211
EFEMP1	0.964467	0.961237	0.927082	0.948435	0.65832
ZBTB1	0.96645	0.959214	0.927032	0.948437	0.658642
ZDHHC17	0.968702	0.956944	0.926994	0.948438	0.658751
ZFP91	0.965392	0.960225	0.926994	0.948438	0.658806
ANKRD13D	0.970694	0.954933	0.926948	0.948441	0.659183
C20orf112	0.972691	0.952927	0.926903	0.948443	0.659508
IPPK	0.969366	0.956189	0.926897	0.948444	0.659561
ARCN1	0.962489	0.963013	0.926889	0.948445	0.659724
CDC40	0.963676	0.961744	0.926809	0.94845	0.660316
NKD1	0.968968	0.956441	0.92676	0.948452	0.660691
CCT5	0.968702	0.956692	0.92675	0.948453	0.660746
ARIH2	0.963544	0.961744	0.926683	0.948458	0.661396
NPAS1	0.974958	0.950427	0.926627	0.948461	0.661881
PHF21B	0.971093	0.95418	0.926598	0.948463	0.662151
LRFN4	0.977232	0.948186	0.926597	0.948464	0.662206
PTBP3	0.963676	0.961491	0.926565	0.948467	0.662638
TOMM70A	0.964335	0.960731	0.926467	0.948471	0.663122
CNOT4	0.965789	0.959214	0.926398	0.948475	0.663717
ZDHHC14	0.971626	0.953428	0.926375	0.948476	0.663824
SENP1	0.964996	0.959972	0.926369	0.948477	0.663932
PGM5	0.967509	0.957448	0.92634	0.94848	0.664365
GAB3	0.967509	0.957448	0.92634	0.94848	0.664365
HNF4A	0.972025	0.952927	0.926268	0.948485	0.665016
DAB1	0.967377	0.957448	0.926213	0.948488	0.665395
CCT4	0.96328	0.961491	0.926185	0.948491	0.665769
STAU1	0.966318	0.958456	0.926174	0.948492	0.665878
SRSF11	0.965524	0.959214	0.926144	0.948495	0.666255
ZNF384	0.969632	0.954933	0.925933	0.948503	0.667443
AHCYL1	0.963016	0.961491	0.925931	0.948504	0.667498
TRIM39	0.966318	0.958204	0.92593	0.948504	0.667607
PTGS2	0.965789	0.958709	0.92591	0.948505	0.667769
UBP1	0.96526	0.959214	0.925891	0.948506	0.667824
NETO1	0.964732	0.959719	0.925871	0.948507	0.667987
GLS	0.957365	0.967087	0.925856	0.948508	0.66815
TIPARP	0.965128	0.959214	0.925764	0.948512	0.668747
BTBD2	0.973757	0.950677	0.925729	0.948514	0.66891
STS	0.970429	0.953929	0.92572	0.948515	0.669017
PIAS1	0.969101	0.955184	0.925669	0.948519	0.669553
DKC1	0.962225	0.961998	0.925659	0.94852	0.669662
PSMD3	0.968437	0.955686	0.925522	0.948529	0.670856
DBF4	0.961304	0.962759	0.925504	0.948531	0.671125
ACVR1B	0.967642	0.956441	0.925492	0.948532	0.671232
WDR43	0.967377	0.956692	0.925482	0.948532	0.671338
MTF2	0.963544	0.960478	0.925462	0.948534	0.671499
FRMD5	0.96526	0.958709	0.925403	0.948537	0.671929
GDF5	0.973624	0.950427	0.925359	0.94854	0.672306
YTHDF1	0.97309	0.950927	0.925338	0.94854	0.67236
NMT1	0.965392	0.958456	0.925286	0.948543	0.67274
NUFIP2	0.967377	0.956441	0.925239	0.948547	0.673228
RSPRY1	0.964071	0.959719	0.925238	0.948547	0.673336
AKT2	0.972691	0.951176	0.9252	0.948551	0.673766
USP22	0.966318	0.957448	0.925199	0.948552	0.673929
WDR26	0.962489	0.961237	0.92518	0.948553	0.674092
CYBB	0.962489	0.961237	0.92518	0.948553	0.674092
GMPS	0.96857	0.955184	0.925162	0.948554	0.674198
HINFP	0.967244	0.956441	0.925112	0.948556	0.674469
KIF2A	0.96698	0.956692	0.925102	0.948557	0.674524
KLHL15	0.969764	0.953929	0.925086	0.948557	0.674579
FZR1	0.97096	0.952676	0.925011	0.948559	0.674902
IDS	0.970163	0.953428	0.92498	0.948562	0.675279
ZNF131	0.963016	0.960478	0.924956	0.948564	0.675492
MFAP1	0.962752	0.960731	0.924946	0.948565	0.6756
MAPKAP1	0.964467	0.958961	0.924887	0.948568	0.676032
HNF1B	0.96645	0.956944	0.924839	0.948569	0.676195
APPBP2	0.962884	0.960478	0.924829	0.94857	0.676303
PRR14L	0.939335	0.984535	0.924809	0.948571	0.676466
DPYSL3	0.968702	0.954682	0.924802	0.948572	0.676521
FCHO2	0.965392	0.957952	0.924799	0.948573	0.676681
ANAPC7	0.965128	0.958204	0.924789	0.948574	0.676842
FLRT3	0.968172	0.955184	0.924782	0.948575	0.676951
AHCYL2	0.961304	0.961998	0.924772	0.948576	0.677114
RPS6KB1	0.960252	0.963013	0.924735	0.948578	0.677385
AGPS	0.959464	0.963775	0.924707	0.948581	0.677712
PAX3	0.970562	0.952676	0.924631	0.948584	0.678141
LCK	0.968172	0.954933	0.924539	0.94859	0.679002
ZBTB7C	0.976027	0.947192	0.924485	0.948592	0.679274
ANTXR1	0.964467	0.958456	0.9244	0.948594	0.679487
SLC7A3	0.969764	0.953177	0.924357	0.948596	0.679703
KCNA4	0.972824	0.950178	0.924356	0.948596	0.679757
PLS3	0.962884	0.959972	0.924342	0.948598	0.680028
PAPD7	0.970163	0.952676	0.924251	0.948602	0.680672
PICALM	0.96328	0.959466	0.924235	0.948603	0.680835
ETV5	0.962752	0.959972	0.924215	0.948605	0.681106
SLC6A14	0.962489	0.960225	0.924206	0.948606	0.681214
MYBL1	0.963939	0.958709	0.924137	0.948607	0.681377
NR5A2	0.962884	0.959719	0.924099	0.948608	0.681486
PTPN9	0.965392	0.957196	0.924069	0.948609	0.681594
NR2C1	0.960778	0.961744	0.924022	0.94861	0.68181
SERBP1	0.964071	0.958456	0.92402	0.948611	0.681865
MAGED2	0.963544	0.958961	0.924001	0.948611	0.681919
LCP1	0.963016	0.959466	0.923982	0.948612	0.682028
XKR7	0.977098	0.945455	0.923802	0.948619	0.682892
CSK	0.967642	0.954682	0.92379	0.948621	0.683267
PIAS4	0.972691	0.949679	0.923744	0.948623	0.683481
SNX27	0.962225	0.959972	0.92371	0.948625	0.683697
RAD21	0.964732	0.957448	0.92368	0.948626	0.683859
CHRM3	0.97003	0.952176	0.923639	0.948627	0.683968
ACVR2B	0.968968	0.953177	0.923598	0.948628	0.684129
XRCC6	0.965128	0.956944	0.923573	0.948629	0.684238
KBTBD2	0.963939	0.957952	0.923408	0.948635	0.685047
IKZF4	0.975359	0.946695	0.923368	0.948635	0.685154
ARHGEF3	0.964071	0.9577	0.923291	0.94864	0.68575
EIF3L	0.966053	0.955686	0.923244	0.948642	0.686073
KPNA6	0.961436	0.960225	0.923194	0.948644	0.68629
RAPGEF5	0.964732	0.956944	0.923194	0.948644	0.686344
METTL16	0.964467	0.957196	0.923184	0.948645	0.686399
ARIH1	0.960909	0.960731	0.923175	0.948645	0.686505
SLC13A4	0.967112	0.954431	0.923041	0.948651	0.68732
ANKRD13C	0.96328	0.958204	0.923019	0.948653	0.687537
MYEF2	0.963016	0.958456	0.923009	0.948653	0.687645
TBC1D22A	0.970562	0.950927	0.922933	0.948656	0.688023
CPEB1	0.963148	0.958204	0.922892	0.948658	0.688238
TRAF2	0.972025	0.94943	0.92287	0.94866	0.688562
TFCP2L1	0.964864	0.956441	0.922835	0.948662	0.688831
GK	0.960778	0.960478	0.922806	0.948664	0.689099
GRHL1	0.963544	0.9577	0.922786	0.948665	0.689207
WDR1	0.975493	0.945951	0.922768	0.948666	0.689314
FARSB	0.963016	0.958204	0.922766	0.948666	0.689368
RALGPS2	0.958676	0.962505	0.922731	0.948668	0.689585
ENAH	0.961962	0.959214	0.922727	0.948668	0.68964
MITF	0.964732	0.956441	0.922708	0.948669	0.689911
MTPAP	0.964732	0.956441	0.922708	0.94867	0.689911
MAPK8IP2	0.970827	0.950427	0.922701	0.948671	0.689964
FOXJ2	0.963148	0.957952	0.922649	0.948672	0.690176
CYP26B1	0.978169	0.943229	0.922638	0.948673	0.690284
DDX5	0.964335	0.956692	0.922572	0.948677	0.690876
WHSC1	0.967112	0.953929	0.922556	0.948678	0.690984
GPC4	0.96857	0.952426	0.922491	0.948681	0.691467
IKZF1	0.973357	0.947688	0.922439	0.948685	0.6919
TBX18	0.968968	0.951926	0.922386	0.948687	0.692278
CAMK2A	0.964864	0.955938	0.922349	0.948689	0.692442
DACH1	0.967907	0.952927	0.922344	0.948689	0.692494
SARS	0.963016	0.9577	0.92228	0.948691	0.692764
ZNF296	0.975894	0.94496	0.922181	0.948694	0.69325
FYN	0.962884	0.9577	0.922154	0.948695	0.693357
SRC	0.970163	0.950427	0.922069	0.948699	0.693843
UBQLN4	0.968172	0.952176	0.92187	0.948707	0.694975
KIAA0907	0.960778	0.959466	0.921834	0.94871	0.695301
KHSRP	0.969366	0.950927	0.921796	0.948711	0.695517
FAM169A	0.961699	0.958456	0.921746	0.948712	0.695679
LIN9	0.960515	0.959466	0.921582	0.948715	0.696217
MAP3K7	0.961962	0.957952	0.921513	0.948719	0.696645
PRPF4	0.961699	0.958204	0.921504	0.94872	0.696753
ATP6V1B2	0.961436	0.958456	0.921494	0.94872	0.696806
ZNF326	0.961172	0.958709	0.921484	0.948721	0.696914
TCF7L2	0.963939	0.955938	0.921466	0.948722	0.697022
TRIM39-RPP21	0.963676	0.956189	0.921456	0.948722	0.697076
ZRSR2	0.960383	0.959466	0.921456	0.948723	0.69713
MAP4K5	0.961567	0.958204	0.921378	0.948726	0.697613
GSPT2	0.97096	0.948932	0.921375	0.948727	0.697667
IL1RAPL2	0.962752	0.956944	0.9213	0.948731	0.69826
RORC	0.963939	0.955686	0.921224	0.948734	0.698801
ALB	0.960383	0.959214	0.921213	0.948735	0.698855
RAB11FIP4	0.966715	0.952927	0.921208	0.948736	0.69896
FBXL5	0.962621	0.956944	0.921174	0.948736	0.699069
NFKBIZ	0.961567	0.957952	0.921135	0.948738	0.699283
FAM65B	0.961041	0.958456	0.921116	0.948739	0.699445
SNW1	0.960778	0.958709	0.921106	0.94874	0.6995
MLLT1	0.973224	0.946447	0.921105	0.94874	0.699554
KANSL3	0.968968	0.950427	0.920934	0.948746	0.700472
WDR37	0.968437	0.950927	0.920913	0.948747	0.700633
TFE3	0.968437	0.950927	0.920913	0.948748	0.700633
ARNTL	0.96183	0.957448	0.920902	0.948748	0.700687
IGF2BP3	0.964071	0.955184	0.920865	0.948749	0.700902
CCT3	0.964732	0.954431	0.920769	0.948755	0.701712
ZNF512	0.96012	0.958961	0.920718	0.948758	0.701981
PHF1	0.966186	0.952927	0.920704	0.948758	0.702035
USP51	0.968437	0.950677	0.920671	0.948759	0.702197
ESR1	0.968172	0.950927	0.920661	0.94876	0.702305
CARM1	0.968172	0.950927	0.920661	0.94876	0.702305
SYDE1	0.964864	0.95418	0.920653	0.94876	0.702359
GPS1	0.97096	0.948186	0.920651	0.948761	0.702414
PPM1E	0.967642	0.951426	0.92064	0.948761	0.702576
PPP5C	0.967642	0.951426	0.92064	0.948762	0.702576
CDC16	0.961041	0.957952	0.920631	0.948763	0.702684
ST7	0.960515	0.958456	0.920612	0.948763	0.702738
LUC7L3	0.956448	0.962505	0.920586	0.948764	0.702847
KCNA6	0.974958	0.944218	0.920573	0.948765	0.702955
DYRK2	0.971892	0.947192	0.920568	0.948765	0.703009
CDK16	0.965524	0.953428	0.920558	0.948766	0.703115
ASIC2	0.96857	0.950427	0.920555	0.948767	0.703223
NKRF	0.967774	0.951176	0.920524	0.948769	0.70349
PRDM11	0.957365	0.961491	0.920498	0.948769	0.703544
RORA	0.96012	0.958709	0.920476	0.948771	0.703759
GGA1	0.969233	0.949679	0.920461	0.948772	0.703916
MMP16	0.964864	0.953929	0.920411	0.948773	0.704079
GRHL3	0.967377	0.951426	0.920388	0.948775	0.704347
FOXJ3	0.960515	0.958204	0.920369	0.948776	0.704563
KLHL3	0.968835	0.949929	0.920324	0.948778	0.704834
EBF2	0.964996	0.953678	0.920295	0.94878	0.70505
ABHD16A	0.961041	0.957448	0.920146	0.948784	0.705645
GNL3L	0.967377	0.951176	0.920146	0.948785	0.705697
HSPA8	0.966583	0.951926	0.920115	0.948788	0.706129
PXK	0.95671	0.961744	0.92011	0.948788	0.706238
PDE4D	0.96526	0.953177	0.920064	0.948792	0.706668
RALGPS1	0.959595	0.958709	0.919972	0.948793	0.70683
ZNF513	0.971492	0.946943	0.919948	0.948794	0.707046
USP1	0.961567	0.956692	0.919924	0.948795	0.707101
SRPX2	0.960515	0.9577	0.919885	0.948796	0.707316
HNRNPR	0.96526	0.952927	0.919822	0.948798	0.70753
KCNN2	0.970562	0.947688	0.91979	0.948799	0.707693
PHACTR3	0.962884	0.955184	0.919731	0.9488	0.707855
PSPC1	0.968968	0.949181	0.919726	0.948801	0.707964
NF2	0.962357	0.955686	0.919712	0.948802	0.708072
GMEB2	0.97349	0.944713	0.919669	0.948804	0.708341
PRR5-ARHGAP8	0.969101	0.948932	0.919611	0.948807	0.708831
FXR1	0.959201	0.958709	0.919594	0.948809	0.709049
MSN	0.964732	0.953177	0.91956	0.948811	0.709374
FBXW11	0.960909	0.956944	0.919536	0.948812	0.709535
UBA2	0.963412	0.954431	0.91951	0.948813	0.709644
ARHGAP36	0.969233	0.948683	0.919495	0.948814	0.709806
FUT8	0.95907	0.958709	0.919469	0.948815	0.709969
CRTC3	0.961699	0.955938	0.919324	0.94882	0.710613
DHCR24	0.967774	0.949929	0.919317	0.94882	0.71072
PPP1R16B	0.967774	0.949929	0.919317	0.948821	0.71072
REPS2	0.960383	0.957196	0.919275	0.948822	0.710938
AKAP10	0.958545	0.958961	0.919207	0.948824	0.711208
CELF4	0.967907	0.949679	0.919201	0.948825	0.711262
NR2C2	0.967642	0.949929	0.919191	0.948825	0.71137
U2AF2	0.972424	0.945208	0.919143	0.948827	0.711585
CDC23	0.963016	0.954431	0.919132	0.948828	0.711693
NR4A1	0.971626	0.945951	0.91911	0.948829	0.71185
AKT1	0.96857	0.948932	0.919107	0.94883	0.711958
SLC44A1	0.960909	0.956441	0.919053	0.948833	0.712388
EYA1	0.960383	0.956944	0.919033	0.948834	0.712549
CHM	0.958807	0.958456	0.918975	0.948837	0.712928
FBXO31	0.971093	0.946199	0.918847	0.948843	0.713851
FRMD7	0.961699	0.955435	0.918841	0.948844	0.713905
PIAS3	0.964467	0.952676	0.918825	0.948844	0.71396
RDX	0.957365	0.959719	0.918802	0.948845	0.714067
RELA	0.966715	0.950427	0.918792	0.948846	0.714174
FOXN1	0.969233	0.947937	0.918772	0.948846	0.71428
BANP	0.968702	0.948434	0.918751	0.948847	0.714384
ITFG1	0.959726	0.957196	0.918646	0.94885	0.714814
KRT1	0.96526	0.951676	0.918615	0.948852	0.715085
SLC1A6	0.974157	0.942982	0.918613	0.948852	0.715138
SP2	0.969499	0.94744	0.918542	0.948857	0.715735
MAN1A2	0.96012	0.956441	0.918298	0.948866	0.717031
RLIM	0.961567	0.954933	0.918232	0.948867	0.717141
ZNF800	0.960515	0.955938	0.918192	0.948868	0.717303
PATL1	0.960252	0.956189	0.918182	0.948869	0.717462
LRRTM1	0.976027	0.940518	0.917971	0.948876	0.718375
ATL2	0.957758	0.958456	0.917969	0.948876	0.718428
DNAJC2	0.955533	0.960478	0.917768	0.948885	0.719726
RUFY3	0.95671	0.959214	0.91769	0.948887	0.719941
ABCE1	0.956187	0.959719	0.917671	0.948887	0.720047
EIF3D	0.964467	0.951426	0.917619	0.948889	0.720263
ATP6V1A	0.960646	0.955184	0.917594	0.94889	0.720427
MCMBP	0.959332	0.956441	0.917544	0.948892	0.720696
SLC6A8	0.964599	0.951176	0.917504	0.948894	0.720912
WAC	0.959201	0.956441	0.917419	0.948896	0.721343
RUVBL2	0.971359	0.944465	0.917415	0.948897	0.721397
ZNF219	0.968305	0.94744	0.91741	0.948897	0.72145
FERMT2	0.960646	0.954933	0.917352	0.948899	0.721722
SCFD1	0.953313	0.962251	0.917326	0.9489	0.721831
RUNX1T1	0.966186	0.94943	0.917326	0.9489	0.721883
ELL2	0.961962	0.953428	0.917161	0.948904	0.722479
CPEB3	0.964467	0.950927	0.917138	0.948905	0.722534
BRD7	0.960909	0.954431	0.917121	0.948905	0.722587
GATAD2B	0.962621	0.952676	0.917066	0.948906	0.722748
DYRK1B	0.968437	0.946943	0.917055	0.948907	0.722855
SP3	0.96183	0.953428	0.917036	0.948908	0.723015
TRAF3	0.967377	0.947937	0.917012	0.948909	0.723175
KLHL18	0.970163	0.945208	0.917005	0.94891	0.723228
POGK	0.967112	0.948186	0.917002	0.94891	0.723283
G6PD	0.969897	0.945455	0.916994	0.948911	0.72339
CAPN6	0.962489	0.952676	0.916941	0.948913	0.723712
NR4A2	0.971093	0.944218	0.916924	0.948913	0.723766
CLIP3	0.97003	0.945208	0.91688	0.948914	0.723875
ANKRD13B	0.966715	0.948434	0.916866	0.948915	0.724038
PTPN11	0.961567	0.953428	0.916785	0.948917	0.7242
TBC1D10A	0.967642	0.94744	0.916783	0.948917	0.724255
RELB	0.975493	0.939781	0.916749	0.948919	0.724525
IVNS1ABP	0.955925	0.958961	0.916695	0.94892	0.724794
SENP2	0.955925	0.958961	0.916695	0.948921	0.724794
PABPC1L	0.968039	0.946943	0.916678	0.948921	0.724848
CCPG1	0.961699	0.953177	0.916669	0.948922	0.724956
ALAS1	0.964467	0.950427	0.916656	0.948923	0.725064
SLC3A2	0.968172	0.946695	0.916564	0.948925	0.725491
CDC73	0.954748	0.959972	0.916532	0.948926	0.7256
DCAF8	0.963807	0.950927	0.91651	0.948927	0.725706
CBFA2T2	0.965524	0.949181	0.916458	0.94893	0.726086
CPSF6	0.961172	0.953428	0.916408	0.948933	0.726462
VANGL2	0.968968	0.945703	0.916356	0.948936	0.726944
SP4	0.961567	0.952927	0.916303	0.948939	0.727377
STIP1	0.956972	0.957448	0.916251	0.948941	0.727591
CAMK2G	0.960909	0.953428	0.916157	0.948946	0.728293
SLC6A1	0.966186	0.948186	0.916123	0.948947	0.728507
NOP56	0.962094	0.952176	0.916083	0.948948	0.728615
SF1	0.967112	0.947192	0.91604	0.948951	0.729098
STRBP	0.959201	0.954933	0.915972	0.948954	0.729535
CCDC22	0.964732	0.94943	0.915945	0.948955	0.729589
HHIP	0.963412	0.950677	0.915893	0.948957	0.730019
FBXO21	0.962884	0.951176	0.915873	0.948959	0.73018
ANKRD34A	0.974558	0.939781	0.91587	0.948959	0.730286
PRKRIR	0.960252	0.953678	0.915771	0.948962	0.730663
ZNF281	0.962225	0.951676	0.915727	0.948963	0.730825
PRKAG2	0.962884	0.950927	0.915632	0.948966	0.731255
SLC24A3	0.964335	0.94943	0.915569	0.948968	0.731472
RAP1GAP2	0.970163	0.943723	0.915565	0.948968	0.731527
ARMC8	0.957234	0.956441	0.915537	0.94897	0.731797
NTRK3	0.966318	0.94744	0.915528	0.948971	0.731904
EZR	0.965392	0.948186	0.915371	0.948975	0.732551
SOX9	0.974024	0.939781	0.915369	0.948975	0.732606
ESRP1	0.962094	0.951426	0.915361	0.948976	0.732714
FUBP1	0.95802	0.955435	0.915326	0.948978	0.73293
RTN1	0.967112	0.946447	0.91532	0.948979	0.733036
ZNF133	0.963544	0.949929	0.915298	0.948979	0.73309
CPEB2	0.954618	0.958709	0.9152	0.948983	0.733684
DPYSL5	0.968968	0.944465	0.915156	0.948984	0.733844
PRKG1	0.959595	0.953678	0.915145	0.948985	0.733898
CRMP1	0.966847	0.946447	0.91507	0.948988	0.734383
SLC6A6	0.965789	0.94744	0.915027	0.948991	0.734868
SYVN1	0.965789	0.94744	0.915027	0.948991	0.734868
RANBP9	0.95514	0.957952	0.914979	0.948993	0.735028
DPYSL2	0.965789	0.947192	0.914787	0.948997	0.735783
RTF1	0.956448	0.956441	0.914786	0.948998	0.735838
FLCN	0.968305	0.944713	0.914769	0.948999	0.736
SUZ12	0.955925	0.956944	0.914767	0.949	0.736108
FBXO30	0.961699	0.951176	0.914745	0.949001	0.736325
PPEF1	0.957365	0.955435	0.9147	0.949003	0.736539
TMEM57	0.961041	0.951676	0.914599	0.949006	0.737022
NTN4	0.960252	0.952426	0.914569	0.949007	0.73713
RNF220	0.962884	0.949679	0.914431	0.949012	0.737938
SENP5	0.960778	0.951676	0.914349	0.949014	0.738208
SRSF4	0.964996	0.94744	0.914276	0.949016	0.738423
PARP6	0.958414	0.953929	0.914259	0.949017	0.738532
FAM193B	0.964467	0.947937	0.914254	0.949017	0.73864
TKTL1	0.964467	0.947937	0.914254	0.949017	0.73864
MIER2	0.96698	0.945455	0.914236	0.949019	0.738802
FUS	0.959595	0.952676	0.914183	0.94902	0.739016
CNST	0.961304	0.950927	0.914129	0.949022	0.739287
HIC2	0.974424	0.938062	0.914071	0.949023	0.739446
ZC3H12A	0.968039	0.944218	0.91404	0.949024	0.739554
SCML2	0.958938	0.953177	0.914038	0.949024	0.739609
PPP2R5D	0.961436	0.950677	0.914015	0.949026	0.739825
TBL1X	0.959858	0.952176	0.913953	0.949027	0.740041
ACSL4	0.956317	0.955686	0.913939	0.949028	0.740095
RBM39	0.95253	0.959466	0.913921	0.949028	0.740203
IGF2BP2	0.961304	0.950677	0.91389	0.94903	0.740475
TAB2	0.957496	0.954431	0.913863	0.949032	0.740798
ENG	0.964599	0.947192	0.91366	0.949041	0.741976
FBXL19	0.967112	0.944713	0.913643	0.949042	0.742138
PHF19	0.961172	0.950427	0.913525	0.949046	0.74273
ZNF711	0.959858	0.951676	0.913474	0.949047	0.742945
ZNF148	0.962621	0.948932	0.913462	0.949047	0.743054
ASIC1	0.962621	0.948932	0.913462	0.949048	0.743054
DAB2	0.962357	0.949181	0.913451	0.949049	0.74327
ATG16L1	0.955533	0.955938	0.91343	0.94905	0.743378
PLK2	0.961041	0.950427	0.9134	0.949051	0.743485
PHF21A	0.960252	0.951176	0.913369	0.949052	0.743592
ZNF280C	0.959726	0.951676	0.913348	0.949052	0.743699
FBXO41	0.965921	0.945455	0.913235	0.949056	0.744294
MMP14	0.965128	0.946199	0.913203	0.949057	0.744402
DNAJC11	0.958807	0.952426	0.913193	0.949059	0.744619
CHAMP1	0.964864	0.946447	0.913192	0.949059	0.744727
EBF1	0.966847	0.944465	0.913153	0.949062	0.745104
RANBP10	0.962752	0.948434	0.913108	0.949064	0.745319
CLK3	0.959464	0.951676	0.913099	0.949064	0.745479
PDPK1	0.959464	0.951676	0.913099	0.949065	0.745479
SRPR	0.968305	0.942982	0.913094	0.949065	0.745587
TRIM8	0.970827	0.940518	0.913081	0.949067	0.745802
FCHSD2	0.959858	0.951176	0.912994	0.949069	0.746123
RANBP3	0.962884	0.948186	0.912993	0.949069	0.746177
MTM1	0.956579	0.954431	0.912988	0.94907	0.746284
SH3RF3	0.968437	0.942736	0.91298	0.949071	0.746391
GRK5	0.962225	0.948683	0.912847	0.949074	0.746876
BTK	0.957365	0.953428	0.912778	0.949076	0.747199
RASGRP2	0.965921	0.94496	0.912757	0.949078	0.747416
EPC2	0.959595	0.951176	0.912744	0.949078	0.74747
TBX3	0.968437	0.942489	0.912741	0.949078	0.747578
MKLN1	0.954748	0.955938	0.91268	0.949081	0.747846
CENPI	0.95671	0.953929	0.912633	0.949083	0.748117
ADD3	0.957103	0.953428	0.912528	0.949087	0.748759
CNOT10	0.956056	0.954431	0.912489	0.949089	0.749135
KAT7	0.95802	0.952426	0.912444	0.949091	0.749404
SFPQ	0.956972	0.953428	0.912404	0.949093	0.749618
SOX30	0.961962	0.948434	0.912358	0.949095	0.749942
DEF6	0.963939	0.946447	0.912317	0.949096	0.750049
TRMT1L	0.957103	0.953177	0.912289	0.949097	0.750156
LPPR4	0.961041	0.949181	0.912202	0.949098	0.750371
TBR1	0.968835	0.941503	0.912161	0.949099	0.750534
PTBP1	0.968835	0.941503	0.912161	0.949099	0.750534
TM9SF2	0.959726	0.950427	0.91215	0.9491	0.750588
FAF1	0.956448	0.953678	0.912144	0.9491	0.750642
COL4A3BP	0.954879	0.955184	0.912085	0.949101	0.750803
SP1	0.962357	0.947688	0.912015	0.949104	0.75123
IL1RAPL1	0.958807	0.951176	0.911995	0.949104	0.751284
DDX1	0.95501	0.954933	0.91197	0.949106	0.751445
DBN1	0.962489	0.94744	0.9119	0.949107	0.751661
ZNF496	0.968968	0.94101	0.911809	0.949109	0.751986
HTATSF1	0.960515	0.949181	0.911702	0.949113	0.75252
STXBP1	0.963016	0.946695	0.911683	0.949114	0.752737
ABCF2	0.957889	0.951676	0.9116	0.949117	0.753168
FANCB	0.960646	0.948932	0.911588	0.949119	0.753439
TNIP1	0.963148	0.946447	0.911568	0.94912	0.753546
CCNT1	0.961304	0.948186	0.911495	0.949123	0.753921
COLEC12	0.963807	0.945703	0.911476	0.949123	0.754031
LEO1	0.957234	0.952176	0.911455	0.949124	0.754086
CPNE6	0.962225	0.947192	0.911412	0.949125	0.754246
KBTBD6	0.967907	0.941503	0.911287	0.949129	0.754891
SYK	0.96183	0.94744	0.911277	0.94913	0.754999
PABPC4	0.963544	0.945703	0.911226	0.949132	0.755213
HSP90AB1	0.963016	0.946199	0.911205	0.949132	0.755429
PRMT5	0.958676	0.950427	0.911152	0.949135	0.75575
NR1D1	0.967244	0.941996	0.91114	0.949136	0.755803
TCF12	0.957627	0.951426	0.911111	0.949137	0.756019
KIF3A	0.956972	0.951926	0.910967	0.949139	0.756288
CACNB1	0.963016	0.945951	0.910966	0.949139	0.756343
MED26	0.971093	0.938062	0.910946	0.94914	0.75645
MTMR1	0.955925	0.952927	0.910926	0.949141	0.756614
DCAF15	0.966186	0.942736	0.910857	0.949143	0.756992
WDR48	0.953313	0.955435	0.910828	0.949145	0.757261
XPNPEP1	0.958807	0.949929	0.910799	0.949146	0.757421
SKI	0.970163	0.938798	0.910787	0.949147	0.757474
SESTD1	0.953965	0.954682	0.910733	0.949148	0.757637
LIN54	0.956448	0.952176	0.910707	0.94915	0.757906
FOXK1	0.968039	0.940764	0.910697	0.94915	0.758013
HNF1A	0.964203	0.944465	0.910656	0.949153	0.758336
ZMYND11	0.957365	0.951176	0.910623	0.949155	0.758662
PAK7	0.964071	0.944465	0.910532	0.949158	0.759097
UBASH3B	0.960252	0.948186	0.910497	0.94916	0.759367
CUL4A	0.95907	0.949181	0.910331	0.949162	0.759747
SCAI	0.951619	0.956441	0.910167	0.949165	0.76018
SH3KBP1	0.960909	0.947192	0.910165	0.949166	0.760233
ZNF319	0.974024	0.934395	0.910123	0.949166	0.760287
SLC17A7	0.971226	0.937083	0.910119	0.949166	0.760342
SLC39A10	0.962357	0.945703	0.910104	0.949167	0.76045
IGF2BP1	0.959332	0.948683	0.910102	0.949167	0.760504
RAF1	0.958283	0.949679	0.910061	0.949168	0.760557
CRTC1	0.96526	0.942736	0.909985	0.94917	0.760828
MAPK8IP1	0.962884	0.94496	0.909887	0.949173	0.761316
ARHGAP44	0.962621	0.945208	0.909876	0.949173	0.761424
GTPBP1	0.96328	0.944465	0.909784	0.949179	0.762281
GRHL2	0.955925	0.951676	0.909731	0.949181	0.762549
STIM1	0.962884	0.944713	0.909649	0.949184	0.762925
SLC6A3	0.965657	0.941996	0.909644	0.949184	0.762979
FBXW7	0.952791	0.954682	0.909612	0.949186	0.763303
RHOT1	0.951098	0.956189	0.90943	0.94919	0.763948
PREP	0.958283	0.948932	0.909345	0.949193	0.764326
IRAK1	0.963807	0.943476	0.909329	0.949193	0.76438
WBP11	0.956448	0.950677	0.909273	0.949196	0.764811
TSKS	0.964996	0.942242	0.90926	0.949197	0.764972
LBR	0.954879	0.952176	0.909213	0.949199	0.765243
AKAP4	0.960646	0.946447	0.909201	0.9492	0.76535
ACRC	0.965392	0.941749	0.909157	0.949201	0.765621
NYAP2	0.967907	0.939289	0.909145	0.949202	0.765674
MALT1	0.953052	0.953929	0.909144	0.949202	0.765728
ARPC4-TTLL3	0.962094	0.94496	0.90914	0.949202	0.765782
MTF1	0.958807	0.948186	0.909127	0.949203	0.765943
ZYG11B	0.956187	0.950677	0.909025	0.949206	0.766315
TAB3	0.955925	0.950927	0.909014	0.949206	0.766367
NCL	0.95501	0.951676	0.90886	0.94921	0.76696
MID2	0.958676	0.947937	0.908765	0.949212	0.767284
SPTY2D1	0.954618	0.951926	0.908726	0.949213	0.7675
HBS1L	0.954487	0.951926	0.908601	0.949216	0.767879
SATB2	0.960515	0.945951	0.9086	0.949216	0.767933
GTPBP4	0.95671	0.949679	0.908568	0.949217	0.768095
CTIF	0.964732	0.941749	0.908535	0.949218	0.768256
LRCH1	0.954095	0.952176	0.908467	0.94922	0.768472
NCOA5	0.95907	0.947192	0.908423	0.94922	0.768581
HSPA9	0.955402	0.950427	0.90804	0.94923	0.770089
GNL1	0.958151	0.947688	0.908029	0.949231	0.770144
ZRANB1	0.957365	0.948434	0.907998	0.949232	0.770306
XRCC5	0.953313	0.952426	0.90796	0.949232	0.770414
ZBTB16	0.966847	0.939044	0.907912	0.949234	0.770576
IRF2BP1	0.971626	0.934395	0.907882	0.949234	0.770685
SUGP1	0.963016	0.942736	0.90787	0.949235	0.770792
LINGO1	0.973357	0.93269	0.907841	0.949235	0.770846
POU2F1	0.957889	0.947688	0.90778	0.949236	0.771008
MAU2	0.960646	0.94496	0.907772	0.949237	0.771063
TMEM63C	0.968968	0.936838	0.907766	0.949237	0.771115
SNRK	0.965392	0.940272	0.907731	0.949238	0.77133
EBF3	0.965392	0.940272	0.907731	0.949238	0.77133
ANKRD28	0.964864	0.940764	0.907709	0.949239	0.771384
CENPB	0.971093	0.934639	0.907622	0.94924	0.771652
R3HDM2	0.952139	0.953177	0.907558	0.949242	0.771976
DDX21	0.95514	0.950178	0.907553	0.949243	0.77203
PTPN6	0.960646	0.944713	0.907535	0.949243	0.772139
SLITRK1	0.962094	0.943229	0.907475	0.949244	0.772244
PRPF38B	0.95253	0.952676	0.907453	0.949245	0.772407
ZFX	0.962225	0.942982	0.907362	0.949248	0.772782
USO1	0.957889	0.947192	0.907305	0.94925	0.773157
HECTD2	0.951358	0.953678	0.90729	0.949251	0.773265
LARP4	0.950838	0.95418	0.90727	0.949252	0.773372
REPIN1	0.970429	0.934883	0.907237	0.949253	0.773479
CHUK	0.952791	0.952176	0.907225	0.949253	0.773586
MYBL2	0.960909	0.94397	0.90707	0.949256	0.773963
C10orf2	0.957889	0.946943	0.907067	0.949256	0.774015
ETAA1	0.956317	0.948434	0.907004	0.949257	0.774179
OSBPL9	0.953052	0.951676	0.906997	0.949258	0.774283
TESK1	0.960252	0.944465	0.906924	0.949259	0.774499
ADAM10	0.954226	0.950427	0.906923	0.94926	0.774554
GGNBP2	0.952921	0.951676	0.906872	0.94926	0.774663
DNAJC14	0.958283	0.946199	0.906726	0.949264	0.775147
SRPK2	0.954748	0.949679	0.906705	0.949264	0.775201
NOL4	0.956448	0.947937	0.906653	0.949265	0.775358
RFWD2	0.94811	0.956189	0.906573	0.949268	0.775786
KCND2	0.962621	0.941749	0.906547	0.949269	0.77595
CRY2	0.962621	0.941749	0.906547	0.949269	0.77595
CRTC2	0.958676	0.945455	0.906385	0.949275	0.776811
PTPN12	0.952139	0.951926	0.906366	0.949276	0.776973
ITGB1	0.956841	0.947192	0.906312	0.949278	0.777188
FOXK2	0.967907	0.936349	0.906298	0.949278	0.777242
SLC9A6	0.958283	0.945703	0.906251	0.949279	0.777402
PCSK2	0.961041	0.942982	0.906245	0.94928	0.777509
PLK1	0.966583	0.937572	0.906241	0.94928	0.777615
XKR4	0.966186	0.937817	0.906106	0.949284	0.778367
GRIPAP1	0.956187	0.94744	0.905929	0.94929	0.779173
TM9SF4	0.958414	0.945208	0.9059	0.949291	0.77928
PABPC1	0.958151	0.945455	0.905889	0.949291	0.779334
FBXO42	0.957365	0.946199	0.905858	0.949293	0.779659
XKR6	0.963807	0.939781	0.905767	0.949295	0.779875
ESCO1	0.954748	0.948683	0.905754	0.949295	0.779928
ACHE	0.965524	0.938062	0.905722	0.949296	0.780089
DDX3X	0.959464	0.94397	0.905705	0.949297	0.780142
RAB11FIP3	0.961699	0.941749	0.905679	0.949297	0.780197
FAM160B1	0.9524	0.950927	0.905663	0.949298	0.780303
AMOT	0.95253	0.950677	0.905549	0.9493	0.780684
HOOK3	0.947462	0.955686	0.905477	0.949302	0.780954
GAB2	0.959464	0.943723	0.905468	0.949302	0.781008
CNNM1	0.965921	0.937327	0.905384	0.949304	0.781274
APBB1	0.962884	0.940272	0.905373	0.949305	0.781327
SH2B1	0.964599	0.938553	0.905328	0.949306	0.781488
REPS1	0.953443	0.94943	0.905228	0.949309	0.781923
ASUN	0.951879	0.950927	0.905167	0.94931	0.782136
FXR2	0.959726	0.942982	0.905005	0.949313	0.782624
ITGB8	0.955402	0.947192	0.904949	0.949314	0.782785
CPEB4	0.956579	0.945951	0.904877	0.949317	0.783107
STRN	0.950318	0.952176	0.90487	0.949317	0.783161
LIMK1	0.964071	0.938553	0.904832	0.949318	0.783431
ABCD1	0.966583	0.936104	0.904822	0.949319	0.783484
ABCB7	0.954487	0.947937	0.904794	0.949321	0.783702
NRG2	0.959726	0.942736	0.904768	0.949321	0.783754
STAT4	0.950448	0.951926	0.904756	0.949322	0.783863
CHSY1	0.962225	0.940272	0.904754	0.949323	0.783972
TAGAP	0.960909	0.941503	0.904699	0.949323	0.78408
NAA35	0.951098	0.951176	0.904662	0.949324	0.784187
DPP10	0.950448	0.951676	0.904518	0.949325	0.784451
TBK1	0.950448	0.951676	0.904518	0.949326	0.784451
CMIP	0.96698	0.935371	0.904485	0.949327	0.784613
STT3B	0.952661	0.94943	0.904485	0.949327	0.784667
RAVER1	0.971226	0.931233	0.904438	0.949329	0.784935
TP73	0.965657	0.936593	0.904427	0.94933	0.785096
DTNA	0.954095	0.947937	0.904422	0.949331	0.78515
RFX3	0.953704	0.948186	0.904288	0.949332	0.785474
MEN1	0.963939	0.938062	0.904235	0.949334	0.785689
HSPA12A	0.963676	0.938308	0.904224	0.949335	0.785742
RASIP1	0.957234	0.944465	0.904074	0.949336	0.78601
GGT7	0.962752	0.939044	0.904067	0.949337	0.786064
TLE3	0.968039	0.933908	0.90406	0.949337	0.786116
C18orf8	0.952921	0.948434	0.903783	0.949344	0.787141
CLK2	0.95514	0.946199	0.903753	0.949344	0.787249
RPS6KA3	0.948889	0.952426	0.903747	0.949345	0.787301
PPIG	0.950578	0.950677	0.903692	0.949347	0.787572
TRIM41	0.964864	0.936593	0.903685	0.949347	0.787625
SLC9A7	0.957234	0.94397	0.903601	0.949349	0.787949
DMTF1	0.951228	0.949929	0.903599	0.94935	0.788004
MTA2	0.95671	0.944465	0.903579	0.949351	0.788273
SAMD4A	0.959464	0.941749	0.903574	0.949352	0.788326
MATR3	0.955925	0.945208	0.903548	0.949352	0.78838
INTS10	0.954357	0.946695	0.903485	0.949353	0.788542
GFPT1	0.953052	0.947937	0.903433	0.949355	0.788865
MGAT5	0.952661	0.948186	0.903299	0.949359	0.78951
PATZ1	0.967907	0.933177	0.903229	0.949361	0.789727
HCFC2	0.953573	0.947192	0.903217	0.949362	0.789834
NCSTN	0.954487	0.946199	0.903135	0.949363	0.790102
GRAMD4	0.959726	0.94101	0.903112	0.949365	0.790264
AFTPH	0.956187	0.944465	0.903085	0.949366	0.790426
KIRREL	0.959595	0.94101	0.902989	0.949368	0.7908
GRAMD1B	0.964335	0.936349	0.902954	0.94937	0.791014
FOXP1	0.952791	0.947688	0.902949	0.94937	0.791067
SORT1	0.951749	0.948683	0.902908	0.949371	0.791175
PRKCB	0.960252	0.940272	0.902898	0.949371	0.791228
TAF5	0.953443	0.946943	0.902856	0.949372	0.791335
NUP85	0.953182	0.947192	0.902846	0.949373	0.791444
QRICH1	0.955663	0.944713	0.902827	0.949373	0.791551
AAK1	0.958414	0.941996	0.902821	0.949374	0.791605
UTP14A	0.951358	0.948932	0.902774	0.949374	0.791712
KAL1	0.949798	0.950427	0.902714	0.949376	0.79198
SOX5	0.954226	0.945951	0.902651	0.949378	0.792252
PRKCA	0.954618	0.945455	0.902548	0.94938	0.792575
USP10	0.961041	0.939044	0.902459	0.949383	0.793059
SSRP1	0.957758	0.942242	0.90244	0.949385	0.793273
ZC3H14	0.950968	0.948932	0.902404	0.949386	0.793435
CDH8	0.959726	0.940272	0.902404	0.949386	0.793489
ZNF710	0.969632	0.930505	0.902247	0.94939	0.794131
ACE2	0.949798	0.949929	0.90224	0.949391	0.794185
MTMR12	0.952009	0.947688	0.902208	0.949392	0.794347
OPHN1	0.95514	0.944465	0.902097	0.949394	0.794722
DDX4	0.948889	0.950677	0.902087	0.949394	0.794776
PRKCD	0.959858	0.939781	0.902056	0.949395	0.794938
L3MBTL3	0.954095	0.945455	0.902055	0.949396	0.794991
RBM47	0.970429	0.929536	0.902048	0.949396	0.795044
PAPOLG	0.949278	0.950178	0.901983	0.949398	0.795311
FER	0.949019	0.950427	0.901973	0.949398	0.795366
F2	0.957234	0.942242	0.901946	0.949399	0.795473
CDH9	0.958151	0.941256	0.901866	0.9494	0.795635
DLL1	0.963412	0.936104	0.901854	0.949401	0.795687
PHF16	0.956056	0.943229	0.90178	0.949403	0.796115
EWSR1	0.953704	0.945455	0.901684	0.949406	0.796437
XPR1	0.952921	0.946199	0.901653	0.949406	0.796546
SLC6A17	0.964203	0.935127	0.901653	0.949407	0.7966
NCDN	0.965657	0.933664	0.901599	0.949408	0.79676
STRN4	0.962884	0.936349	0.901595	0.949408	0.796813
KLC2	0.96012	0.939044	0.901595	0.949409	0.796868
DLL4	0.967907	0.931475	0.901581	0.949409	0.796922
RAP1GAP	0.961567	0.937572	0.901539	0.949411	0.797295
EVI5L	0.961962	0.937083	0.901438	0.949413	0.797565
HUNK	0.961436	0.937572	0.901415	0.949414	0.797618
GATAD2A	0.962884	0.936104	0.90136	0.949414	0.797724
ARNT2	0.958545	0.940272	0.901293	0.949415	0.797883
PAN3	0.949538	0.949181	0.901284	0.949416	0.797938
LEPR	0.950968	0.947688	0.901221	0.949418	0.798203
ZBTB20	0.97003	0.929051	0.901208	0.949419	0.798364
BCL6	0.961172	0.937572	0.901169	0.94942	0.79863
PRPF3	0.946297	0.952176	0.901041	0.949423	0.799063
YME1L1	0.950838	0.94744	0.900862	0.949426	0.799547
STAT1	0.952009	0.946199	0.90079	0.949428	0.799762
ARHGEF6	0.947981	0.950178	0.900751	0.949429	0.799923
EIF4B	0.953182	0.94496	0.900719	0.949431	0.800246
TRIM9	0.965789	0.932447	0.900547	0.949433	0.800513
WDTC1	0.960252	0.937817	0.900541	0.949433	0.800567
EIF3B	0.953182	0.944713	0.900483	0.949434	0.800674
CLCN5	0.954618	0.943229	0.900423	0.949436	0.800942
CAPRIN1	0.952009	0.945703	0.900318	0.949437	0.801048
UBE3A	0.954226	0.943476	0.90029	0.949437	0.801156
ELL	0.962225	0.935616	0.900273	0.949438	0.801319
RFX4	0.953443	0.944218	0.900258	0.949439	0.801373
EIF2B5	0.953182	0.944465	0.900247	0.949439	0.801428
GLTSCR1	0.953443	0.94397	0.900022	0.949443	0.802016
MLXIP	0.96645	0.931233	0.89999	0.949444	0.802231
MBD1	0.957103	0.940272	0.899937	0.949446	0.802553
CUL3	0.953834	0.943476	0.89992	0.949447	0.802607
NPEPPS	0.955925	0.941256	0.899771	0.94945	0.80309
RFX2	0.962621	0.934639	0.899703	0.949451	0.803358
FOXP2	0.944616	0.952426	0.899677	0.949453	0.80352
STT3A	0.950968	0.945951	0.899569	0.949456	0.804006
DYRK1A	0.955402	0.941503	0.899513	0.949457	0.804168
PRDM1	0.963412	0.933664	0.899503	0.949457	0.804221
DPP6	0.961304	0.935616	0.899411	0.94946	0.804597
PRKCQ	0.952791	0.94397	0.899407	0.94946	0.80465
ADD2	0.954226	0.942489	0.899347	0.949462	0.804919
LMNA	0.964996	0.931961	0.899339	0.949462	0.805027
USP49	0.964996	0.931961	0.899339	0.949463	0.805027
EXOC8	0.961699	0.935127	0.899311	0.949463	0.805131
RRM1	0.949668	0.946943	0.899282	0.949465	0.805344
TBC1D14	0.954095	0.942489	0.899224	0.949467	0.805612
SAMD4B	0.959595	0.937083	0.89922	0.949467	0.805665
RPS6KA5	0.954226	0.942242	0.899112	0.949469	0.805934
ABCD3	0.945391	0.950927	0.898998	0.949471	0.806254
PDE10A	0.953573	0.942736	0.898968	0.949471	0.806308
PTCHD1	0.963544	0.932934	0.898922	0.949473	0.806468
NAA15	0.949019	0.947192	0.898902	0.949474	0.806684
VPS35	0.949019	0.947192	0.898902	0.949474	0.806684
NSUN2	0.952139	0.94397	0.898792	0.949476	0.807005
ZC3H11A	0.951098	0.94496	0.89875	0.949478	0.807324
HSP90B1	0.951488	0.944465	0.898648	0.949482	0.807805
PIK3R1	0.947203	0.948683	0.898596	0.949484	0.808183
MAP3K3	0.95514	0.940764	0.898562	0.949484	0.808292
EZH2	0.952139	0.943723	0.898556	0.949485	0.808343
KIRREL3	0.966847	0.929294	0.898485	0.949486	0.808611
KIF5C	0.957234	0.938553	0.898415	0.949487	0.809039
MARK4	0.959201	0.936593	0.898381	0.949489	0.809093
KLHL36	0.970694	0.925432	0.898311	0.949493	0.809683
PPARGC1A	0.954618	0.94101	0.898305	0.949493	0.809737
ARNT	0.950838	0.944713	0.898268	0.949494	0.809846
RBM14	0.969101	0.926877	0.898237	0.949495	0.810054
MDGA2	0.947074	0.948434	0.898237	0.949495	0.810108
JMY	0.946038	0.94943	0.898197	0.949497	0.810375
MPHOSPH8	0.953965	0.941503	0.898161	0.949498	0.810535
NGEF	0.961699	0.933908	0.898138	0.949499	0.810695
EXT1	0.956841	0.938553	0.898046	0.949501	0.810911
HIF1A	0.950838	0.944465	0.898033	0.949501	0.810965
CSTF3	0.946556	0.948683	0.897981	0.949502	0.811072
BRD2	0.95501	0.940272	0.897969	0.949503	0.811232
NCAM2	0.950968	0.944218	0.897921	0.949504	0.811394
PHEX	0.948889	0.946199	0.897838	0.949506	0.811715
TP63	0.954618	0.940518	0.897835	0.949507	0.811769
CUL5	0.944358	0.950677	0.897779	0.949509	0.812143
C2CD2L	0.961304	0.933908	0.897769	0.94951	0.812251
LMNB2	0.966318	0.929051	0.897759	0.94951	0.812305
SMEK1	0.95227	0.942736	0.897739	0.949511	0.812359
ECE1	0.957758	0.937327	0.897733	0.949511	0.812413
LGR4	0.950968	0.94397	0.897686	0.949513	0.812626
CASC3	0.953704	0.941256	0.89768	0.949513	0.812679
BRAF	0.943583	0.951176	0.897514	0.949515	0.813054
RGL1	0.952009	0.942736	0.897493	0.949516	0.813163
NFE2L1	0.956448	0.938308	0.897443	0.949517	0.813324
CLCN4	0.964467	0.930505	0.897442	0.949518	0.813378
ZDHHC5	0.955663	0.939044	0.89741	0.949518	0.813484
AR	0.954879	0.939781	0.897377	0.949519	0.813642
CDH11	0.960778	0.933908	0.897278	0.949521	0.813857
SCYL2	0.949278	0.945208	0.897265	0.949522	0.813965
ZC3H12B	0.956972	0.937572	0.897231	0.949522	0.814073
CLPTM1	0.959464	0.935127	0.89722	0.949523	0.814127
KCTD3	0.946944	0.94744	0.897173	0.949523	0.81418
DCLK2	0.956317	0.938062	0.897086	0.949524	0.814394
SF3A1	0.954618	0.939535	0.896897	0.94953	0.8152
IWS1	0.950318	0.943723	0.896837	0.949531	0.815307
DLG3	0.949538	0.944465	0.896806	0.949533	0.815629
PRPF40A	0.950708	0.943229	0.896735	0.949534	0.815843
SOX6	0.952661	0.941256	0.896698	0.949535	0.815951
ATXN7	0.959858	0.934151	0.896652	0.949536	0.816057
RPGR	0.945133	0.948683	0.896632	0.949536	0.816164
MTSS1	0.957496	0.936349	0.89655	0.949538	0.816379
SYNPO	0.959464	0.934395	0.896518	0.949539	0.816592
DGKA	0.947981	0.945703	0.896508	0.94954	0.816644
PAXIP1	0.953443	0.940272	0.896496	0.949541	0.816806
TCEB3	0.947462	0.946199	0.896488	0.949542	0.816969
TRPC4AP	0.949148	0.944465	0.896438	0.949543	0.817131
CLCN3	0.951879	0.941749	0.896431	0.949543	0.817186
PRICKLE1	0.955533	0.938062	0.896349	0.949545	0.817504
ACAP2	0.944099	0.949181	0.896121	0.949548	0.818096
MAGED1	0.954357	0.938798	0.895948	0.949552	0.818629
AKAP8	0.963016	0.930262	0.895858	0.949554	0.818896
HSPA4	0.945133	0.947688	0.895691	0.949556	0.819165
CALD1	0.949538	0.943229	0.895632	0.949557	0.81938
GPHN	0.950708	0.941996	0.895563	0.949559	0.819703
LRP12	0.953704	0.938798	0.895336	0.949563	0.820291
CUL2	0.944487	0.947937	0.895314	0.949564	0.820398
DHX40	0.946815	0.945455	0.895171	0.949567	0.820873
CDH6	0.951228	0.94101	0.895115	0.949568	0.82098
PHF17	0.954095	0.938062	0.895001	0.949569	0.821194
TLE4	0.953834	0.938308	0.89499	0.94957	0.821248
LARP4B	0.953573	0.938553	0.894979	0.94957	0.821301
SEMA3A	0.947333	0.944713	0.894957	0.949572	0.821515
PPP6R1	0.96526	0.927119	0.89491	0.949572	0.821569
ADAM17	0.951749	0.940272	0.894903	0.949572	0.821623
PRKCH	0.951228	0.940764	0.894881	0.949573	0.821678
MAP7D1	0.957889	0.934151	0.894814	0.949575	0.821946
CUL4B	0.946426	0.945455	0.894804	0.949575	0.821999
SIK1	0.960252	0.931718	0.894684	0.949577	0.822321
ZFYVE1	0.959201	0.93269	0.894638	0.949579	0.822591
TRIM28	0.956187	0.935616	0.894623	0.949579	0.822645
CSDE1	0.949668	0.941996	0.894583	0.949581	0.822913
SNX13	0.951879	0.939781	0.894557	0.949581	0.822968
OSBP	0.945133	0.946447	0.894518	0.949583	0.82313
HSPH1	0.947333	0.944218	0.894488	0.949583	0.823238
MFN2	0.954748	0.936838	0.894445	0.949584	0.823344
NYAP1	0.959464	0.932204	0.894416	0.949585	0.82345
AHR	0.947721	0.943723	0.894387	0.949585	0.823504
IL6ST	0.947851	0.943476	0.894275	0.949589	0.82404
CDC5L	0.944616	0.946695	0.894263	0.949589	0.824148
ADAM23	0.946297	0.94496	0.894213	0.949592	0.824523
NCBP1	0.947721	0.943476	0.894153	0.949593	0.824631
CLOCK	0.944487	0.946695	0.894141	0.949593	0.824739
TNFAIP3	0.957365	0.933908	0.894091	0.949594	0.8249
IRF2BPL	0.968172	0.923269	0.893883	0.949597	0.825276
CLCN7	0.95514	0.93586	0.893878	0.949598	0.825382
FAM13B	0.947074	0.943723	0.893775	0.9496	0.825757
FBXO11	0.946038	0.944713	0.893734	0.949602	0.825973
UNK	0.963148	0.927843	0.89365	0.949603	0.826188
GIT2	0.951098	0.939535	0.89359	0.949604	0.826241
UHRF2	0.949538	0.94101	0.893525	0.949605	0.826403
SGIP1	0.948889	0.941503	0.893381	0.949607	0.826727
DCLK1	0.951749	0.938553	0.893267	0.949608	0.826941
GRIA1	0.955402	0.934883	0.893189	0.94961	0.827263
E2F8	0.950578	0.939535	0.893101	0.949613	0.827635
CDH20	0.960778	0.929536	0.893077	0.949614	0.827743
GRIA2	0.950708	0.939289	0.89299	0.949614	0.827796
DLG4	0.960909	0.929294	0.892967	0.949614	0.82785
LEMD3	0.949148	0.940764	0.892925	0.949615	0.827904
RABEP1	0.945909	0.94397	0.89291	0.949615	0.827958
MAP7	0.95253	0.937327	0.892833	0.949616	0.828118
TNPO2	0.963016	0.927119	0.89283	0.949617	0.828172
WDR47	0.949278	0.940518	0.892813	0.949617	0.828225
TOP1	0.942809	0.946943	0.892787	0.949618	0.828331
ALG13	0.953704	0.936104	0.892766	0.949619	0.828493
STAT3	0.948629	0.94101	0.89267	0.949621	0.82876
EPS8	0.947074	0.942489	0.892606	0.949622	0.828919
SMURF2	0.940878	0.948683	0.892595	0.949622	0.828972
CYLD	0.950708	0.938553	0.89229	0.949627	0.829726
KCNQ4	0.962094	0.92736	0.892207	0.949629	0.82994
SYCP1	0.939721	0.94943	0.892199	0.949629	0.829994
ROR1	0.956056	0.933177	0.892169	0.94963	0.830154
PPP1R12A	0.949538	0.939535	0.892124	0.949631	0.830317
SIM1	0.955663	0.933421	0.892036	0.949634	0.830693
KCNB1	0.96012	0.929051	0.892001	0.949635	0.830798
DDN	0.959332	0.929778	0.891966	0.949636	0.831011
PNPT1	0.94268	0.946199	0.891963	0.949636	0.831065
PRKCG	0.957234	0.931718	0.891872	0.949638	0.831333
ZC3H12C	0.952921	0.93586	0.891801	0.94964	0.83165
STOX2	0.960646	0.928326	0.891793	0.949641	0.831759
HGF	0.940749	0.947937	0.891771	0.949641	0.831811
CLASRP	0.94837	0.940272	0.891726	0.949642	0.831919
KAT2B	0.943841	0.944713	0.891659	0.949644	0.832242
SUV420H1	0.950448	0.938062	0.891579	0.949645	0.832405
PIK3AP1	0.955402	0.933177	0.891559	0.949647	0.832621
ELMO1	0.948889	0.939535	0.891514	0.949648	0.832783
DDX26B	0.945133	0.943229	0.891477	0.949649	0.832891
ARHGEF7	0.956056	0.932447	0.891472	0.949649	0.832945
PCIF1	0.955794	0.93269	0.89146	0.949649	0.832999
PRKCE	0.957627	0.930747	0.891309	0.949651	0.833215
NELL2	0.946685	0.941503	0.891307	0.949651	0.833268
JPH3	0.969632	0.919202	0.891287	0.949652	0.833427
GRIK2	0.947851	0.940272	0.891238	0.949653	0.833481
DPP8	0.948759	0.939289	0.891159	0.949655	0.833805
WDR44	0.946685	0.941256	0.891073	0.949657	0.834128
NLGN2	0.963807	0.92447	0.891011	0.949658	0.834234
MCM6	0.949798	0.938062	0.89097	0.949659	0.834447
TAF4	0.949278	0.938553	0.890948	0.94966	0.834501
SLC8A1	0.954487	0.933421	0.890938	0.949661	0.834663
HNRNPM	0.956972	0.93099	0.890931	0.949661	0.834717
HNRNPUL2	0.946167	0.941503	0.890819	0.949666	0.835415
PPP6R3	0.942423	0.945208	0.890785	0.949667	0.835524
ZZZ3	0.944616	0.942982	0.890756	0.949668	0.835685
SLMAP	0.943841	0.943723	0.890725	0.949669	0.835846
ZER1	0.959726	0.928084	0.890707	0.949669	0.835899
TLE1	0.95671	0.93099	0.890687	0.949669	0.835954
USP33	0.942036	0.945455	0.890653	0.949671	0.836116
KCNB2	0.956579	0.93099	0.890566	0.949672	0.836385
COPB2	0.944099	0.943229	0.890502	0.949673	0.836598
PI4KB	0.951358	0.93586	0.890338	0.949677	0.837191
KDM1A	0.945779	0.941256	0.890221	0.94968	0.837621
TRIM46	0.958676	0.928568	0.890196	0.949681	0.837729
MORC4	0.946685	0.940272	0.890142	0.949683	0.837999
SMURF1	0.949408	0.937572	0.890139	0.949683	0.838052
PTPRA	0.949538	0.937327	0.890028	0.949685	0.838266
PNISR	0.945779	0.94101	0.889988	0.949686	0.838426
SFMBT1	0.947981	0.938798	0.889963	0.949687	0.838587
DDR2	0.949408	0.937327	0.889906	0.949688	0.838749
EPAS1	0.954357	0.932447	0.889887	0.949689	0.838856
TLK2	0.93895	0.94744	0.889599	0.949691	0.839127
EPB41L4B	0.946556	0.939781	0.889555	0.949692	0.839344
[truncated: 1,165 more rows]

## Sheet: 0.5≤pLI<0.9
	BF.LoF	BF.Mis	BF.total	qval	pval
PSPH	19.7231	0.98315	19.3907	0.402463	0.000206931
KLF9	19.7213	0.971699	19.1632	0.430684	0.000303827
KCNV1	19.5153	0.959466	18.7243	0.462009	0.000572617
MECP2	19.4844	0.953678	18.5818	0.469749	0.000667871
BLID	0.994433	4.65592	4.63001	0.517872	0.00186128
LYL1	0.989821	4.63283	4.58567	0.527621	0.00201456
RAB9B	0.990432	4.61096	4.56685	0.541096	0.0021235
EFNA1	0.988953	4.5976	4.54681	0.553362	0.00229321
B3GNT7	0.982064	4.42806	4.34864	0.618572	0.00536158
METTL14	0.964864	4.50433	4.34607	0.620791	0.00541851
KCNC3	0.971759	4.3592	4.23609	0.653862	0.00715881
LRRC8D	0.960646	4.36355	4.19183	0.668067	0.00774621
CDK13	0.920281	4.20046	3.8656	0.707388	0.0108113
SHROOM3	0.912399	3.88664	3.54617	0.720845	0.0121005
FXYD2	0.996508	0.996163	0.992685	0.783654	0.0165309
HSBP1	0.997055	0.995313	0.992382	0.7906	0.017132
CD52	0.997042	0.995234	0.992289	0.79415	0.0174604
STRA13	0.996426	0.995818	0.992259	0.794727	0.0175152
COX7C	0.996823	0.995313	0.992151	0.796991	0.0177336
SPANXN5	0.99644	0.995685	0.99214	0.797546	0.0177884
GNG12	0.996508	0.995526	0.99205	0.79919	0.0179526
GNG2	0.996864	0.994968	0.991848	0.80289	0.0183352
RPL39	0.995347	0.996163	0.991528	0.80739	0.0188268
SEC61G	0.996358	0.995101	0.991477	0.808354	0.0189352
SPANXN1	0.996303	0.995101	0.991422	0.809774	0.0190989
SFTA2	0.996098	0.995207	0.991324	0.813427	0.0195358
YAF2	0.99573	0.995472	0.991221	0.815615	0.0198089
C14orf2	0.995511	0.995579	0.99111	0.817735	0.0201369
NREP	0.996153	0.994862	0.991035	0.820593	0.0205201
SMR3B	0.996344	0.99465	0.991014	0.822171	0.020739
GNG5	0.9967	0.994252	0.990971	0.82256	0.0207938
COX17	0.996932	0.994014	0.990964	0.82333	0.0209033
GLRX5	0.994665	0.996163	0.990849	0.824468	0.021067
TMEM160	0.994011	0.996801	0.990831	0.825216	0.0211759
HMGA2	0.99487	0.995765	0.990656	0.828825	0.0217228
MT1E	0.996044	0.994544	0.990609	0.830552	0.0219959
TMEM167B	0.996085	0.994438	0.990544	0.832232	0.0222691
DEFB128	0.995894	0.994623	0.990539	0.832562	0.0223239
SPINK2	0.994515	0.995685	0.990224	0.841396	0.0239087
GNG3	0.996713	0.993484	0.990219	0.841677	0.0239634
SPRR4	0.995197	0.994942	0.990163	0.843062	0.0242366
PPY	0.995921	0.994173	0.990117	0.844144	0.0244556
DEFB104A	0.996235	0.993828	0.990086	0.845204	0.0246745
SNRPF	0.994679	0.995074	0.989779	0.850915	0.0259315
HMGN4	0.995293	0.994305	0.989625	0.853433	0.0265325
MOBP	0.995839	0.993722	0.989587	0.853877	0.0266415
CTXN3	0.995634	0.993855	0.989515	0.85497	0.0269147
COX6A2	0.99573	0.993696	0.989452	0.85625	0.0272431
RASL10A	0.995648	0.993749	0.989423	0.857084	0.0274615
NDUFA1	0.99588	0.993457	0.989364	0.8577	0.0276247
POLR2L	0.996659	0.99261	0.989294	0.858308	0.0277884
RPS27	0.99502	0.99404	0.989089	0.860278	0.0283358
MRPL33	0.994747	0.994305	0.989082	0.860662	0.0284453
SMPX	0.995184	0.993802	0.989015	0.861981	0.0288285
BRK1	0.996864	0.992002	0.988891	0.863976	0.0294296
HMGN2	0.993997	0.994756	0.988784	0.866054	0.0300854
UBE2A	0.995306	0.993378	0.988715	0.867055	0.0304128
TRIAP1	0.995989	0.992531	0.98855	0.870077	0.0314518
FKBP1A	0.994201	0.994279	0.988513	0.870986	0.0317797
SPTSSA	0.99588	0.992584	0.988494	0.871433	0.0319439
MZT1	0.995866	0.992531	0.988428	0.872021	0.0321624
PKIG	0.99629	0.992108	0.988427	0.872167	0.0322171
RPL36A	0.994897	0.993484	0.988414	0.872457	0.0323266
S100A7L2	0.995702	0.99261	0.988344	0.873454	0.0327093
CYCS	0.99532	0.992901	0.988255	0.874289	0.0330366
MYCBP	0.99427	0.993934	0.988238	0.8747	0.0332003
CCL2	0.994952	0.993245	0.988231	0.874836	0.0332551
PTMS	0.993806	0.994332	0.988173	0.875642	0.0335835
S100A7	0.995825	0.992161	0.988019	0.877709	0.0344589
NDUFA11	0.992853	0.994995	0.987883	0.879426	0.0352236
CXCL10	0.994583	0.993245	0.987865	0.879783	0.0353868
KRTAP6-3	0.995033	0.99269	0.987759	0.88095	0.0359337
RPLP1	0.994692	0.993007	0.987737	0.881292	0.0360979
SPINK4	0.994733	0.992928	0.987698	0.881744	0.0363163
PFDN1	0.993888	0.993696	0.987622	0.883278	0.0371358
ZNF580	0.994256	0.993272	0.987566	0.88381	0.0373537
TOMM5	0.993534	0.993961	0.987533	0.884229	0.0375727
PRR13	0.993983	0.993484	0.987506	0.884746	0.0378437
SUMO1	0.993275	0.994146	0.98746	0.885052	0.0380079
SNRPG	0.992648	0.994676	0.987364	0.885557	0.0382811
COX7B	0.993915	0.993378	0.987333	0.885856	0.038442
TMEM170B	0.994174	0.993087	0.987301	0.886053	0.0385509
MRPS36	0.99412	0.99314	0.987299	0.886152	0.0386057
SNURF	0.993888	0.993351	0.98728	0.886445	0.0387699
CHIC1	0.993288	0.993908	0.987237	0.886832	0.0390436
CDC26	0.995088	0.992082	0.987209	0.887404	0.0393721
CDC42SE2	0.994106	0.99306	0.987207	0.887498	0.0394268
RABL5	0.995047	0.992082	0.987168	0.887966	0.0396995
CKS1B	0.994038	0.992954	0.987034	0.888609	0.0401374
SEC61B	0.99397	0.992901	0.986914	0.889681	0.0407943
VMA21	0.993452	0.993351	0.986847	0.890117	0.0410675
SUMO2	0.993139	0.993643	0.986825	0.890547	0.0413412
ENY2	0.993534	0.993245	0.986823	0.890632	0.041396
ISCA1	0.99273	0.99404	0.986813	0.890886	0.0415591
FXYD6	0.993479	0.993272	0.986795	0.891055	0.0416686
NOP10	0.993275	0.993325	0.986644	0.892607	0.0427065
SH3BGRL3	0.993043	0.993537	0.986625	0.892766	0.042816
TRAPPC2	0.994651	0.991844	0.986539	0.894157	0.0437992
DYNLL2	0.994351	0.992134	0.98653	0.894232	0.0438539
RPL38	0.991764	0.994676	0.986484	0.894457	0.0440182
DYNLL1	0.994201	0.992214	0.98646	0.894754	0.0442361
HCRT	0.995416	0.990972	0.986429	0.894974	0.0443997
TUSC2	0.994229	0.992108	0.986382	0.895266	0.0446187
NRGN	0.995511	0.990788	0.98634	0.895911	0.0451103
TCEB1	0.994542	0.991712	0.986299	0.896332	0.0454382
PFN2	0.994297	0.991923	0.986266	0.896471	0.0455477
RPS28	0.995115	0.990999	0.986158	0.897493	0.0463678
MTPN	0.993697	0.992399	0.986144	0.897626	0.0464767
GABARAPL1	0.994051	0.992002	0.986101	0.897824	0.0466404
HSPE1	0.993002	0.993007	0.986059	0.898152	0.046913
HES5	0.993016	0.992954	0.986019	0.898411	0.0471314
FCER1G	0.991669	0.994279	0.985995	0.898604	0.0472946
FEZ1	0.99442	0.991448	0.985915	0.899424	0.0480041
TIMM8A	0.99412	0.991738	0.985906	0.899486	0.0480582
DYNLT3	0.993288	0.992531	0.98587	0.899793	0.0483314
C2orf15	0.992961	0.992822	0.985834	0.900037	0.0485498
BANF1	0.993452	0.992293	0.985795	0.900398	0.0488783
C19orf48	0.994542	0.991157	0.985748	0.900694	0.049152
PIN4	0.993738	0.991949	0.985738	0.900812	0.0492615
KRTAP17-1	0.994515	0.990999	0.985563	0.901847	0.0502447
ATP5G3	0.992839	0.992558	0.98545	0.902841	0.0512273
SF3B5	0.994897	0.990497	0.985443	0.903163	0.0515553
FAM110D	0.991451	0.993908	0.985411	0.903323	0.0517184
LSM6	0.991438	0.993775	0.985266	0.904207	0.0526479
WFDC2	0.99457	0.990629	0.98525	0.904359	0.0528116
RNF166	0.993506	0.991685	0.985246	0.90441	0.0528664
MIEN1	0.99303	0.992108	0.985193	0.904661	0.053139
S100A9	0.993792	0.99121	0.985057	0.905641	0.0542322
C4orf3	0.991152	0.993802	0.985009	0.905927	0.0546143
LEPROTL1	0.993247	0.991632	0.984936	0.906163	0.054888
TBCA	0.993833	0.990999	0.984888	0.90658	0.0553796
UCN	0.995074	0.989707	0.984832	0.906763	0.0555975
SUB1	0.992539	0.992161	0.984759	0.90708	0.0559807
TMEM47	0.991982	0.992716	0.984756	0.907125	0.0560355
RPL30	0.99337	0.991316	0.984743	0.907215	0.056145
EIF1	0.99367	0.990999	0.984726	0.907304	0.0562544
TMEM60	0.992989	0.991659	0.984706	0.907348	0.0563092
C20orf24	0.990609	0.99404	0.984705	0.907393	0.0563639
SPANXN3	0.993084	0.991553	0.984696	0.907437	0.0564187
CRH	0.993833	0.990761	0.984652	0.907613	0.0566371
TXNDC8	0.99273	0.991817	0.984607	0.907875	0.0569639
SPCS2	0.992839	0.991659	0.984558	0.90809	0.0572376
HM13	0.994624	0.989759	0.984439	0.908973	0.0583812
CENPW	0.992322	0.992029	0.984412	0.909014	0.058436
ERH	0.992077	0.992267	0.984405	0.909177	0.0586539
TCF15	0.994433	0.989891	0.984381	0.909299	0.0588175
SNRPE	0.991723	0.992558	0.984342	0.909461	0.059036
C1orf21	0.992403	0.99187	0.984335	0.909501	0.0590907
NDUFC2-KCTD14	0.994952	0.989259	0.984265	0.910094	0.0599113
PAGE4	0.992594	0.991553	0.98421	0.910249	0.0601297
ROMO1	0.994147	0.989997	0.984202	0.910288	0.0601845
CHRAC1	0.993656	0.990471	0.984188	0.910365	0.0602934
RPS25	0.992539	0.991553	0.984156	0.910633	0.0606761
RPLP2	0.994229	0.989838	0.984126	0.910821	0.0609482
MAFK	0.994829	0.989206	0.984091	0.911083	0.0613308
GUCA2B	0.993888	0.990102	0.98405	0.911341	0.0617118
GOLT1B	0.992757	0.99121	0.984031	0.911414	0.0618213
PSENEN	0.99156	0.992293	0.983918	0.911704	0.0622587
RPL36	0.994665	0.989101	0.983824	0.912166	0.0629693
DSTN	0.993207	0.99055	0.983821	0.912201	0.063024
CDK2AP1	0.993792	0.989918	0.983773	0.912376	0.0632978
INS	0.992866	0.990788	0.98372	0.912652	0.063733
ARPC5L	0.991982	0.991632	0.983681	0.912957	0.064224
BEX1	0.993084	0.990471	0.983621	0.913092	0.064443
IL2	0.99209	0.991448	0.983606	0.913159	0.0645519
PTH2	0.99618	0.987366	0.983594	0.913225	0.0646614
MS4A6E	0.992975	0.990524	0.983566	0.913358	0.0649351
SNCA	0.991954	0.991527	0.983549	0.913489	0.0650994
PAIP2	0.992186	0.991263	0.983517	0.91362	0.0653178
NHP2L1	0.993615	0.989786	0.983466	0.913782	0.065591
IL21	0.992281	0.991104	0.983454	0.913814	0.0656457
DYNLRB1	0.992499	0.990867	0.983434	0.91391	0.0658094
SNRPD2	0.994229	0.989075	0.983366	0.914133	0.0661926
SST	0.993561	0.989733	0.98336	0.914165	0.0662473
DENR	0.991886	0.991395	0.983351	0.914197	0.0663015
RAX2	0.99367	0.989522	0.983258	0.914571	0.0669579
RPL36A-HNRNPH2	0.992172	0.990999	0.983241	0.914695	0.0671758
PEA15	0.993738	0.989364	0.983169	0.914847	0.067449
CALM2	0.991805	0.991184	0.983061	0.915239	0.0681601
TSEN15	0.990799	0.992187	0.983058	0.915269	0.0682148
POLD4	0.993465	0.989443	0.982978	0.915709	0.0690349
HMGA1	0.992989	0.989918	0.982977	0.915738	0.0690896
MRPS17	0.992594	0.990207	0.982874	0.916252	0.0700734
PHF5A	0.992063	0.990709	0.982846	0.916336	0.0702376
FIGLA	0.992471	0.990287	0.982831	0.91642	0.0704018
NDUFC2	0.994938	0.98776	0.98276	0.916968	0.0714934
ID2	0.99457	0.988075	0.982709	0.917236	0.0720386
FLYWCH2	0.994392	0.988233	0.982691	0.917341	0.0722576
POMP	0.991383	0.991184	0.982643	0.917603	0.072804
DDA1	0.991479	0.991052	0.982606	0.917784	0.0731866
MED19	0.992417	0.990102	0.982594	0.91781	0.0732414
PPIL3	0.99065	0.991765	0.982491	0.918115	0.0738972
RNPC3	0.98611	0.996269	0.982432	0.918165	0.0740067
SNRPD1	0.991778	0.990445	0.982301	0.918562	0.0748804
TTC36	0.989767	0.992399	0.982244	0.918733	0.075263
LAMTOR3	0.990079	0.992082	0.982239	0.918757	0.0753178
LIN52	0.991424	0.990603	0.982108	0.918997	0.0758641
RPS12	0.992485	0.989522	0.982086	0.919092	0.0760826
FAM19A1	0.992825	0.989154	0.982057	0.919187	0.0763015
BEX2	0.992335	0.989575	0.98199	0.919375	0.0767373
VAMP2	0.992104	0.989786	0.98197	0.919398	0.076792
FXYD6-FXYD2	0.991261	0.990577	0.98192	0.919675	0.0774473
B2M	0.991166	0.990577	0.981826	0.920014	0.0782657
ATP6V1F	0.994583	0.987156	0.981808	0.920148	0.0785931
KISS1	0.994365	0.987339	0.981776	0.92017	0.0786478
KRTAP5-7	0.992961	0.988733	0.981773	0.920192	0.0787026
FAM19A2	0.991139	0.99055	0.981773	0.920214	0.0787573
NXT1	0.993752	0.987865	0.981692	0.92039	0.0791931
NPY	0.991016	0.990524	0.981625	0.920649	0.0798489
FGF4	0.991533	0.989997	0.981614	0.920671	0.0799026
NKX2-5	0.995484	0.986054	0.981601	0.920756	0.0801199
VAMP1	0.990405	0.991052	0.981543	0.920947	0.080612
SF3B14	0.990663	0.990788	0.981537	0.921052	0.0808847
SPACA4	0.994092	0.987339	0.981507	0.921177	0.0812126
BEX4	0.991397	0.98997	0.981453	0.92128	0.0814863
FAM103A1	0.990392	0.990972	0.981451	0.921301	0.0815405
TAC1	0.991275	0.990076	0.981437	0.921342	0.0816494
CISD2	0.993384	0.98797	0.981433	0.921383	0.0817589
PPP3R1	0.99224	0.989048	0.981373	0.921545	0.0821969
SRP14	0.991682	0.989522	0.981292	0.921746	0.0827427
LY6E	0.993207	0.987996	0.981284	0.921766	0.0827974
C1orf86	0.99224	0.988943	0.981269	0.921826	0.0829605
RPS15A	0.991914	0.989233	0.981233	0.921905	0.0831795
EIF4EBP2	0.993629	0.987523	0.981232	0.921944	0.0832884
TNFRSF13C	0.992417	0.988654	0.981157	0.922101	0.0837247
NUTF2	0.990663	0.990366	0.981119	0.922236	0.0841074
MAP1LC3A	0.993588	0.987418	0.981087	0.922371	0.0844884
NAA50	0.990487	0.990497	0.981075	0.922409	0.0845974
UBL3	0.989713	0.991184	0.980987	0.922692	0.0854169
MOB1A	0.991846	0.988996	0.980931	0.922804	0.0857431
RPS23	0.991927	0.988733	0.980751	0.92317	0.0868347
FAM163A	0.993547	0.987077	0.980707	0.923296	0.0872168
MZT2B	0.99307	0.98755	0.980706	0.923313	0.0872716
CREBL2	0.989523	0.991078	0.980694	0.923403	0.0875453
PFDN6	0.990826	0.989759	0.98068	0.923438	0.0876542
CSF2	0.992158	0.988417	0.980666	0.923473	0.0877632
RNF24	0.990541	0.990023	0.980658	0.923491	0.0878179
ZNRF2	0.987165	0.993351	0.980602	0.923614	0.0882006
NDP	0.991492	0.988996	0.980581	0.923684	0.0884185
CPLX2	0.993547	0.986946	0.980577	0.923701	0.0884727
RPL37	0.991574	0.98889	0.980558	0.923788	0.0887458
CDA	0.992022	0.988417	0.980532	0.92384	0.088909
CST6	0.992145	0.988128	0.980366	0.924213	0.0901084
TRIM61	0.990419	0.989628	0.980146	0.924674	0.0916352
IFNA13	0.991016	0.988969	0.980085	0.924867	0.0922872
C19orf12	0.993615	0.986368	0.980071	0.924914	0.0924509
RPL32	0.992757	0.987208	0.980058	0.924946	0.0925593
CEND1	0.993384	0.9865	0.979973	0.925228	0.0935414
PMP22	0.99156	0.988312	0.97997	0.925244	0.0935956
FXN	0.990636	0.989233	0.97997	0.925259	0.0936503
C16orf54	0.992227	0.987628	0.979951	0.92529	0.0938145
RPL34	0.990324	0.989496	0.979921	0.925413	0.0942525
YPEL5	0.991859	0.987944	0.979901	0.925428	0.0943072
PTGES	0.993683	0.98608	0.979851	0.92555	0.0947441
ARL4A	0.99137	0.988338	0.979808	0.9257	0.0952915
SREK1IP1	0.988492	0.991184	0.979777	0.92579	0.0956194
IFNA1	0.990622	0.989048	0.979774	0.925804	0.0956742
PPIAL4G	0.99273	0.986893	0.979719	0.925952	0.0962189
UBE2L3	0.991207	0.988391	0.979699	0.926068	0.0966552
LSM10	0.993765	0.985844	0.979698	0.926097	0.0967647
MRPL30	0.990595	0.988969	0.979668	0.926141	0.0969278
RFK	0.990487	0.989075	0.979665	0.926155	0.0969825
LY6G6D	0.99065	0.98889	0.979644	0.926198	0.0971457
UBE2N	0.992022	0.987497	0.979619	0.926241	0.0973088
RPS15	0.993888	0.985635	0.97961	0.926313	0.097582
IL7	0.989998	0.989496	0.979599	0.926384	0.0978557
ID3	0.993547	0.985949	0.979587	0.926412	0.0979646
YPEL4	0.991805	0.987681	0.979587	0.926426	0.0980194
RPS20	0.98898	0.990497	0.979583	0.926454	0.0981289
BATF	0.99239	0.987024	0.979513	0.926691	0.0990524
UCN3	0.993779	0.985635	0.979503	0.926705	0.0991066
PCNP	0.989428	0.989865	0.9794	0.926937	0.100035
RBM3	0.992295	0.986972	0.979367	0.927045	0.100471
PPP1R14B	0.992662	0.986605	0.979365	0.927058	0.100526
UBE2D3	0.990283	0.988969	0.97936	0.927085	0.100635
CALM1	0.990459	0.988785	0.979352	0.927112	0.100744
NR2C2AP	0.991669	0.98755	0.979322	0.927192	0.101071
VBP1	0.988574	0.990603	0.979284	0.927218	0.10118
TMEM138	0.990527	0.988601	0.979236	0.92731	0.101563
CXorf40A	0.991764	0.987366	0.979234	0.927323	0.101618
DAZAP2	0.991655	0.987471	0.979231	0.927337	0.101672
RPL27	0.991995	0.987129	0.979228	0.92735	0.101727
AKIRIN1	0.988113	0.990999	0.979219	0.927363	0.101781
FAU	0.993084	0.986001	0.979182	0.927428	0.102055
SYNJ2BP	0.991179	0.987812	0.979099	0.927621	0.102871
RPL28	0.993438	0.985451	0.978985	0.927874	0.103963
TOMM22	0.992213	0.986657	0.978974	0.927911	0.104127
SPCS3	0.993942	0.984901	0.978935	0.927961	0.104344
LY6G5C	0.989306	0.989496	0.978914	0.928048	0.104724
OXT	0.994488	0.984326	0.9789	0.928072	0.104833
STMN1	0.988194	0.99055	0.978856	0.928146	0.105162
GABARAP	0.989916	0.988812	0.978841	0.92817	0.105271
MAL	0.9919	0.986762	0.978769	0.928364	0.106143
KRTAP1-3	0.992022	0.986578	0.978708	0.928542	0.106961
CALM3	0.99065	0.987944	0.978706	0.928554	0.107015
FGF20	0.991288	0.987287	0.978686	0.928601	0.107233
DUSP3	0.992757	0.985818	0.978678	0.928671	0.107559
H2AFZ	0.991778	0.986788	0.978674	0.928683	0.107614
RPL31	0.991614	0.986919	0.978644	0.928741	0.107939
C14orf1	0.99012	0.988364	0.978599	0.928856	0.108485
RPS27A	0.990663	0.987812	0.978589	0.928891	0.108649
CXorf40B	0.9919	0.986578	0.978587	0.928902	0.108704
TMEM65	0.988736	0.989733	0.978585	0.928914	0.108758
PDZD11	0.989319	0.989048	0.978485	0.929038	0.10936
PRAF2	0.99205	0.98629	0.978448	0.929072	0.109524
SNRPD3	0.990405	0.987891	0.978412	0.929151	0.109906
EIF1AX	0.988154	0.990128	0.978399	0.929173	0.110016
ARPC5	0.992322	0.985897	0.978327	0.929284	0.110562
MCTS1	0.98852	0.98968	0.978318	0.929295	0.110616
DR1	0.989781	0.988417	0.978316	0.929306	0.110671
OSTC	0.989808	0.988312	0.978239	0.929361	0.110943
AP1S2	0.989469	0.988575	0.978164	0.929481	0.111539
PPIA	0.991859	0.986159	0.978131	0.929503	0.111648
CFL1	0.992213	0.985792	0.978115	0.929535	0.11181
ZNRF1	0.989482	0.988496	0.978099	0.929557	0.11192
C5orf24	0.991655	0.986316	0.978085	0.929568	0.111975
EEF1E1	0.989767	0.988154	0.978042	0.929632	0.112301
CBX3	0.989048	0.988864	0.978034	0.929643	0.112356
CGGBP1	0.990351	0.987497	0.977969	0.929812	0.11323
CBX5	0.99031	0.987523	0.977954	0.929823	0.113285
TAF12	0.989821	0.98797	0.977914	0.929886	0.113613
AP1S1	0.990948	0.986841	0.977908	0.929896	0.113667
PRH2	0.989143	0.988627	0.977894	0.929917	0.113775
RPL23A	0.990378	0.987339	0.977839	0.929959	0.113994
EIF5A	0.990677	0.986998	0.977796	0.930072	0.114593
FAM127A	0.992812	0.984797	0.977718	0.930144	0.114976
INS-IGF2	0.989944	0.987628	0.977696	0.930215	0.115358
NKAIN1	0.988235	0.989285	0.977646	0.930326	0.115959
TMEM35	0.991438	0.986054	0.977611	0.930396	0.116342
PFN1	0.993452	0.984012	0.977568	0.930456	0.11667
RPL27A	0.991125	0.986316	0.977563	0.930466	0.116725
CDX1	0.990351	0.987024	0.9775	0.930535	0.117107
ORMDL3	0.992812	0.984561	0.977484	0.930544	0.11716
IL23A	0.989957	0.987339	0.977424	0.930642	0.117705
PPP1R11	0.992512	0.984744	0.977371	0.930739	0.118251
BASP1	0.992063	0.985189	0.97737	0.930758	0.11836
JTB	0.989998	0.987234	0.97736	0.930777	0.118469
NANOS2	0.993752	0.983489	0.977344	0.930806	0.118633
GOLGA7	0.988018	0.98918	0.977328	0.930835	0.118797
GDF1	0.988303	0.988812	0.977245	0.930977	0.119615
VWC2	0.988479	0.988627	0.977237	0.930996	0.119725
SAT1	0.989835	0.987208	0.977173	0.931117	0.120434
FRAT2	0.990215	0.986736	0.977081	0.931256	0.121306
RGS10	0.989252	0.987655	0.977039	0.931311	0.121579
SDHD	0.98833	0.988548	0.977012	0.931374	0.121961
RPRM	0.992567	0.9843	0.976983	0.931428	0.122288
BARX1	0.990174	0.986605	0.97691	0.93158	0.123215
LSM4	0.989957	0.986814	0.976904	0.931598	0.123325
CMTM6	0.990011	0.986736	0.97688	0.931633	0.123541
CPLX1	0.993139	0.98362	0.976871	0.931642	0.123596
SLC31A1	0.989957	0.986762	0.976852	0.931677	0.123813
GADD45G	0.992934	0.983751	0.9768	0.931765	0.124359
HBA1	0.99416	0.982445	0.976708	0.931903	0.125231
CALY	0.990867	0.985661	0.976659	0.931946	0.125505
FGF7	0.988465	0.988023	0.976626	0.931997	0.125833
TRAPPC3	0.99103	0.985451	0.976612	0.932031	0.126052
PDZD9	0.988289	0.98818	0.976608	0.932039	0.126107
NHLH2	0.994952	0.981533	0.976577	0.932065	0.126269
TBPL1	0.989862	0.986578	0.976577	0.932073	0.126323
LTA	0.991044	0.985346	0.976521	0.932132	0.126706
HIST1H2AI	0.994024	0.982367	0.976496	0.932174	0.126979
CETN1	0.993411	0.982915	0.976438	0.932257	0.127525
ALOX5AP	0.989781	0.986473	0.976392	0.932298	0.127796
PHOX2A	0.990582	0.985661	0.976377	0.932331	0.128013
MAGOH	0.988018	0.988207	0.976366	0.932348	0.128122
DDIT3	0.988994	0.987156	0.976291	0.932445	0.128777
TGFA	0.990066	0.98608	0.976284	0.932453	0.128886
NRN1	0.991166	0.98498	0.976278	0.93247	0.128995
PHLDA3	0.99461	0.981507	0.976217	0.932574	0.129702
RPS24	0.986435	0.989628	0.976203	0.93259	0.129812
C15orf57	0.988709	0.987339	0.976192	0.932614	0.129975
SDC2	0.989496	0.986526	0.976163	0.932646	0.130194
RPS14	0.990622	0.985373	0.976132	0.932733	0.130794
BOLA1	0.993043	0.982941	0.976103	0.932788	0.131176
TMEM89	0.992335	0.98362	0.976081	0.932811	0.131339
RPL35	0.99122	0.984718	0.976073	0.932842	0.131557
RAB1A	0.989713	0.986211	0.976066	0.932866	0.131721
TNNC1	0.991152	0.98477	0.976057	0.932881	0.131831
NDUFB11	0.990066	0.985844	0.97605	0.932889	0.131885
POMZP3	0.989618	0.98629	0.97605	0.932897	0.13194
RHOA	0.990881	0.985032	0.976049	0.932904	0.131994
MOB4	0.988221	0.987681	0.976047	0.932912	0.132049
NDUFAB1	0.992131	0.983777	0.976036	0.932928	0.132157
GTSF1	0.986881	0.988996	0.976021	0.932943	0.132266
GATAD1	0.988059	0.987812	0.976017	0.932951	0.13232
UBE2E1	0.989808	0.986054	0.976004	0.932958	0.132375
TMEM203	0.992227	0.983646	0.976	0.932974	0.132538
PTGES3	0.986381	0.98947	0.975994	0.932981	0.132593
TCEAL4	0.988709	0.987103	0.975958	0.933027	0.13292
H3F3A	0.992757	0.983045	0.975925	0.933058	0.133136
ARL3	0.988045	0.987628	0.975822	0.933193	0.134114
RCAN1	0.988208	0.987445	0.9758	0.933223	0.134332
APOOL	0.98936	0.98629	0.975796	0.933231	0.134387
CMTM8	0.989631	0.986001	0.975778	0.933238	0.134441
CDKN1C	0.989767	0.985844	0.975756	0.933275	0.134714
UBE2G1	0.987233	0.988364	0.975746	0.933283	0.134769
CLEC2D	0.987084	0.988496	0.975729	0.93329	0.134823
TPI1	0.989184	0.986395	0.975726	0.933298	0.134878
C11orf73	0.986692	0.988864	0.975704	0.933335	0.13515
C9orf142	0.989482	0.986028	0.975657	0.933386	0.135532
GPSM3	0.989197	0.98629	0.975635	0.933408	0.135696
LMO2	0.990242	0.985242	0.975628	0.933423	0.135858
RPS26	0.988709	0.986709	0.975569	0.933495	0.136458
GMNN	0.988872	0.9865	0.975522	0.933567	0.136949
SNRPC	0.988709	0.986657	0.975517	0.933575	0.137004
ATP6V0C	0.992703	0.98268	0.975509	0.933589	0.137113
CDC42	0.988682	0.986657	0.97549	0.933603	0.137222
HIST1H2AC	0.993792	0.981559	0.975466	0.933632	0.137441
NXT2	0.989252	0.986054	0.975455	0.933639	0.137496
TCEAL6	0.990161	0.985137	0.975444	0.933667	0.137714
KLF2	0.987544	0.987733	0.975431	0.933696	0.137933
HIST1H2AE	0.993493	0.981819	0.97543	0.933703	0.137988
RGS1	0.988506	0.986762	0.97542	0.933717	0.138097
HN1L	0.990242	0.985006	0.975395	0.933766	0.138477
IER3	0.991968	0.98328	0.975383	0.93378	0.138587
PTP4A1	0.989686	0.98553	0.975365	0.933787	0.138641
TNFAIP8L2	0.993411	0.981819	0.97535	0.933794	0.138695
NME5	0.989102	0.986054	0.975308	0.933822	0.138912
DLX6	0.989292	0.985792	0.975236	0.933906	0.139566
MARCKSL1	0.991968	0.983098	0.975201	0.93394	0.139837
GP9	0.992567	0.982497	0.975194	0.933954	0.139946
ZNF444	0.989387	0.985608	0.975148	0.934009	0.140381
LGALSL	0.988913	0.986028	0.975095	0.93405	0.140761
MRPS25	0.989211	0.985713	0.975078	0.934077	0.140925
CALML5	0.993997	0.98096	0.975071	0.93409	0.141034
CHMP6	0.987951	0.986946	0.975053	0.934131	0.141361
C11orf58	0.98814	0.986736	0.975033	0.934144	0.14147
CLDN2	0.989821	0.985006	0.97498	0.934218	0.142069
FAM20C	0.983411	0.991395	0.974948	0.934258	0.142394
KCNE4	0.993125	0.981611	0.974862	0.93437	0.14332
SPIB	0.988249	0.986447	0.974855	0.93439	0.143484
TOMM20	0.985435	0.989127	0.974721	0.93452	0.144575
RPL29	0.989306	0.985215	0.974679	0.934571	0.145011
VPS37D	0.990161	0.984352	0.974667	0.93459	0.145175
RNF4	0.991859	0.982654	0.974654	0.934609	0.145338
SSPN	0.989957	0.984509	0.974622	0.934641	0.145612
PTP4A2	0.987477	0.986946	0.974586	0.934704	0.146155
RGS8	0.98837	0.986028	0.974561	0.934736	0.146427
COPZ1	0.986435	0.987944	0.974542	0.934773	0.146754
COMMD9	0.988614	0.985661	0.974438	0.934879	0.147681
TSR2	0.98913	0.985137	0.974428	0.934885	0.147735
NHLH1	0.992825	0.981455	0.974413	0.934897	0.147844
NUDT3	0.989944	0.984273	0.974375	0.934947	0.148278
PFN3	0.99175	0.982471	0.974366	0.934959	0.148386
CNIH2	0.989008	0.985163	0.974334	0.934989	0.148657
TCEAL3	0.9905	0.98362	0.974276	0.935038	0.149091
LDOC1	0.992499	0.981611	0.974247	0.935074	0.149418
LMO4	0.991207	0.982889	0.974246	0.93508	0.149473
UBE2E3	0.987991	0.986028	0.974187	0.935134	0.149963
EBAG9	0.987003	0.986972	0.974144	0.935152	0.150126
H3F3B	0.991383	0.982602	0.974135	0.935164	0.150234
VCX3A	0.991669	0.982289	0.974105	0.935194	0.150506
SAR1A	0.989347	0.984587	0.974098	0.935206	0.150616
HMGB3	0.988682	0.985215	0.974065	0.935247	0.150996
FGF10	0.988655	0.985242	0.974064	0.935259	0.151106
PTPRCAP	0.989808	0.984064	0.974034	0.935306	0.15154
WIBG	0.988547	0.985268	0.973983	0.935353	0.151975
NCALD	0.989631	0.984143	0.973939	0.935417	0.15263
ZNF428	0.990881	0.982889	0.973925	0.935434	0.15274
CRADD	0.990976	0.982758	0.973889	0.935468	0.153067
KDELR1	0.988669	0.985032	0.97387	0.935503	0.153393
TCEAL2	0.988492	0.985189	0.973852	0.935509	0.153448
NIP7	0.989672	0.983803	0.973642	0.935723	0.155518
H2AFJ	0.991343	0.982132	0.973629	0.935728	0.155571
METTL7B	0.987761	0.985661	0.973597	0.935778	0.156061
C1QTNF5	0.990201	0.983228	0.973594	0.935784	0.156116
MYL3	0.989808	0.983594	0.973569	0.935833	0.156608
TMED2	0.990622	0.982784	0.973568	0.935839	0.156663
UQCRFS1	0.989089	0.9843	0.97356	0.935855	0.156827
TCEAL5	0.989265	0.984012	0.973449	0.935969	0.157972
RPL11	0.987883	0.985346	0.973407	0.936012	0.158408
ZNF740	0.990297	0.982941	0.973403	0.936018	0.158462
RAB9A	0.987057	0.986106	0.973343	0.936071	0.159007
RNF185	0.987856	0.985268	0.973302	0.936087	0.159171
ARF3	0.988899	0.984169	0.973244	0.936166	0.159984
GREM1	0.99084	0.982236	0.973239	0.936182	0.160148
UBTD2	0.989916	0.98315	0.973236	0.936193	0.160257
ARF6	0.992485	0.980569	0.9732	0.936198	0.160312
RAB7L1	0.988167	0.984849	0.973195	0.936203	0.160367
RBPMS	0.987734	0.985268	0.973182	0.936214	0.160476
VSNL1	0.986394	0.9865	0.973078	0.936323	0.161623
TMEM225	0.988791	0.98409	0.973059	0.936333	0.161732
SYNJ2BP-COX16	0.987233	0.985635	0.973051	0.936348	0.161896
MAFG	0.992131	0.980699	0.972983	0.93642	0.162658
PLLP	0.989971	0.982836	0.972979	0.936425	0.162711
EID1	0.991968	0.98083	0.972952	0.93645	0.162984
KRTAP4-12	0.98993	0.982836	0.972939	0.936455	0.163038
ZC4H2	0.988574	0.984169	0.972923	0.93647	0.1632
HMGB1	0.987003	0.985713	0.972902	0.936506	0.163583
TAF10	0.990364	0.982367	0.972901	0.936511	0.163638
RPL24	0.98611	0.986578	0.972875	0.936541	0.163966
RPP25L	0.989238	0.983437	0.972853	0.936576	0.164347
TNNC2	0.991071	0.981611	0.972846	0.936586	0.164456
UXT	0.987355	0.985294	0.972835	0.936601	0.16462
COX4I1	0.987815	0.984823	0.972823	0.936616	0.164783
PGF	0.989808	0.98281	0.972793	0.93666	0.165272
MYLPF	0.990039	0.982576	0.972788	0.936665	0.165327
POLR2F	0.98503	0.987523	0.97274	0.936695	0.165653
RAC2	0.989849	0.982706	0.97273	0.936699	0.165708
HBEGF	0.990079	0.982289	0.972544	0.936797	0.166795
FAM211A	0.987707	0.98464	0.972535	0.936807	0.166904
UBE2M	0.989618	0.982732	0.972529	0.936816	0.167014
CCDC117	0.985975	0.986342	0.972509	0.936835	0.167233
CD28	0.989265	0.983019	0.972467	0.936888	0.167831
SSR4	0.989008	0.983228	0.97242	0.936945	0.168484
TMEM123	0.988249	0.98396	0.972397	0.936964	0.168757
MOSPD1	0.986502	0.985635	0.972331	0.937016	0.169304
TIMP2	0.989089	0.983045	0.972319	0.937026	0.169413
ERAS	0.990921	0.98122	0.972312	0.937035	0.169522
SSR2	0.985975	0.986132	0.972302	0.937049	0.169686
C5orf30	0.989197	0.982915	0.972297	0.937072	0.170013
PSMB5	0.989319	0.982784	0.972288	0.937086	0.170122
NPM3	0.989971	0.982106	0.972256	0.937128	0.170608
SNX12	0.990595	0.981455	0.972224	0.937151	0.17088
THAP1	0.987504	0.984509	0.972206	0.937165	0.171043
SSU72	0.988994	0.982993	0.972174	0.937179	0.171207
CTLA4	0.988398	0.983568	0.972156	0.937193	0.17137
PDGFA	0.989984	0.981976	0.972141	0.937206	0.171534
ARF1	0.990894	0.981064	0.97213	0.937225	0.171752
HIST1H3J	0.992335	0.979607	0.972099	0.937261	0.172188
LIF	0.990595	0.981324	0.972095	0.937266	0.172243
SEC11C	0.988411	0.983463	0.972066	0.93732	0.172898
NAP1L5	0.989686	0.982184	0.972054	0.937329	0.173005
EFHD1	0.99031	0.981559	0.972048	0.937333	0.17306
FAM133A	0.986381	0.985451	0.97203	0.937356	0.173333
TWSG1	0.988032	0.983777	0.972003	0.937365	0.173441
RAP2A	0.991601	0.980231	0.971998	0.937369	0.173496
SNAP23	0.98611	0.985687	0.971996	0.937374	0.173551
TNFSF8	0.988696	0.983098	0.971984	0.937387	0.173715
TIMM17B	0.98611	0.985635	0.971944	0.937414	0.174097
UBB	0.990976	0.980778	0.971927	0.937432	0.174315
YIPF6	0.9868	0.984927	0.971926	0.937436	0.17437
VWC2L	0.988221	0.983463	0.971879	0.937489	0.175022
C12orf68	0.991546	0.980049	0.971764	0.937576	0.176169
TAF11	0.989116	0.982419	0.971726	0.937598	0.17644
PXDC1	0.989414	0.982106	0.97171	0.937646	0.177039
EIF3J	0.98503	0.986473	0.971706	0.937658	0.177202
TESC	0.987328	0.984169	0.971697	0.937667	0.17731
CGB	0.991343	0.980179	0.971693	0.937671	0.177472
H2AFX	0.993152	0.978335	0.971636	0.937693	0.177636
ETV3	0.982468	0.988969	0.971631	0.937697	0.17769
RAB27B	0.987558	0.983751	0.971511	0.937811	0.179214
JDP2	0.98894	0.982367	0.971502	0.937828	0.179432
VCX	0.99069	0.980595	0.971466	0.937866	0.179923
RAB5A	0.985975	0.985268	0.97145	0.937883	0.18014
BCL7B	0.987734	0.983411	0.971348	0.937957	0.181121
APOO	0.984085	0.987051	0.971342	0.937965	0.18123
TIMP1	0.988872	0.982236	0.971306	0.937998	0.181666
DUSP14	0.98955	0.981507	0.97125	0.938047	0.182319
TSPAN9	0.98657	0.984378	0.971158	0.938091	0.182914
APOBEC3H	0.98772	0.98315	0.971077	0.938172	0.184002
MED30	0.987842	0.983019	0.971068	0.938176	0.184056
TMEM11	0.98993	0.980934	0.971056	0.938184	0.184166
AKAP14	0.985435	0.985399	0.971046	0.938192	0.184275
CCDC12	0.986922	0.983881	0.971014	0.938227	0.184767
PGP	0.988194	0.982602	0.971001	0.938243	0.184985
OSTF1	0.98476	0.986028	0.971	0.938247	0.18504
YWHAH	0.986719	0.983986	0.970917	0.93831	0.18591
TSC22D3	0.988696	0.981976	0.970875	0.938349	0.186453
ASF1B	0.989075	0.981559	0.970836	0.938364	0.186671
TAGLN3	0.987585	0.982967	0.970763	0.938418	0.187432
TRAPPC5	0.992199	0.978387	0.970755	0.938434	0.187649
RRAS2	0.988086	0.982419	0.970714	0.938461	0.18803
GRPEL1	0.987815	0.98268	0.970706	0.938464	0.188085
PLEKHF2	0.988614	0.981871	0.970692	0.938476	0.188248
GAS1	0.989116	0.98135	0.970669	0.93851	0.188739
KCNMB2	0.987111	0.983333	0.970659	0.938518	0.188848
AES	0.98611	0.984273	0.970602	0.938555	0.189389
TCF21	0.990161	0.980231	0.970586	0.93857	0.189608
NUS1	0.987003	0.983306	0.970526	0.938612	0.190208
GDNF	0.990908	0.979425	0.97052	0.938619	0.190317
FUNDC2	0.986962	0.983333	0.970512	0.938627	0.190426
C1orf226	0.98894	0.98135	0.970496	0.938649	0.190752
FKBP3	0.985975	0.984273	0.970469	0.938678	0.191188
CD247	0.9853	0.984927	0.970449	0.938697	0.191459
CHMP1B	0.991193	0.979062	0.970439	0.938704	0.191569
FAM3A	0.98856	0.981637	0.970407	0.93873	0.19195
RNASEH2C	0.990745	0.979451	0.970386	0.938745	0.192166
FAM104A	0.988398	0.981767	0.970376	0.938748	0.19222
OR6C2	0.988411	0.981715	0.970338	0.938767	0.192492
CXorf48	0.98726	0.982836	0.970315	0.938785	0.192764
MRAS	0.989645	0.980413	0.970261	0.93885	0.193743
RAB21	0.984355	0.985661	0.97024	0.938875	0.194123
VKORC1L1	0.988289	0.981715	0.970218	0.9389	0.194503
RAB39B	0.989075	0.980934	0.970217	0.938904	0.194557
RHOC	0.98856	0.981376	0.97015	0.93895	0.195321
MBP	0.988682	0.981194	0.970089	0.938992	0.195974
FBXO45	0.987044	0.982784	0.970051	0.939013	0.196303
OR51A2	0.988506	0.981272	0.969993	0.939041	0.196738
NDFIP2	0.984355	0.985373	0.969956	0.939069	0.197175
SAP30L	0.98395	0.985739	0.969918	0.939101	0.197665
SOCS3	0.99171	0.977998	0.96989	0.939128	0.198099
ARL8B	0.984895	0.984744	0.969869	0.939149	0.198427
HIST1H1B	0.992145	0.977531	0.969853	0.939156	0.198536
UNC119B	0.986638	0.982967	0.969832	0.939173	0.198808
SPIN2B	0.987815	0.981793	0.96983	0.93918	0.198916
PDX1	0.989374	0.980231	0.969815	0.939193	0.199134
PGRMC1	0.991614	0.977998	0.969797	0.93921	0.199405
AK1	0.988506	0.981064	0.969788	0.939217	0.199515
ITM2B	0.986421	0.983045	0.969697	0.939328	0.201315
NUDT11	0.989726	0.979737	0.969672	0.939348	0.201643
OR8B3	0.988899	0.980543	0.969658	0.939358	0.201805
NXPH2	0.988262	0.981168	0.969651	0.939362	0.20186
EFNA5	0.988438	0.980986	0.969644	0.939372	0.202079
VGLL2	0.986597	0.98281	0.969638	0.939378	0.202188
SDF2	0.986827	0.982576	0.969632	0.939382	0.202243
SLBP	0.984085	0.985294	0.969613	0.939401	0.20257
RHBDD2	0.989021	0.980361	0.969598	0.939408	0.202679
YKT6	0.985435	0.983907	0.969577	0.939418	0.202842
PSMD14	0.987937	0.981402	0.969564	0.939425	0.202951
KLF13	0.988886	0.980361	0.969465	0.939467	0.20366
C8orf46	0.988398	0.98083	0.96945	0.939477	0.203823
ZNF346	0.985165	0.983986	0.969388	0.939516	0.204477
FGF14	0.98611	0.983019	0.969365	0.939545	0.204966
KCNMB4	0.989455	0.979607	0.969277	0.939603	0.205947
HES7	0.989849	0.979218	0.969277	0.939606	0.206002
SPIN3	0.987774	0.981272	0.969276	0.939609	0.206056
ATP6V1E1	0.98476	0.984273	0.969273	0.939619	0.206219
OR5P3	0.988886	0.980153	0.969259	0.939641	0.2066
CBLN1	0.990066	0.978828	0.969104	0.939723	0.20802
CLCF1	0.988642	0.980205	0.969072	0.939751	0.208512
RAB6A	0.983815	0.984954	0.969013	0.939791	0.209218
OR8D2	0.988804	0.979971	0.969	0.939807	0.20949
DNAJC5	0.989387	0.979373	0.96898	0.939838	0.210032
ARL4C	0.991995	0.976625	0.968808	0.939947	0.211991
OR13C5	0.988682	0.979867	0.968777	0.939959	0.212209
C12orf44	0.990487	0.97805	0.968745	0.939992	0.212809
MORF4L2	0.987829	0.980621	0.968686	0.940025	0.213407
ZNF146	0.98657	0.981845	0.968659	0.940052	0.213896
CA7	0.987964	0.980413	0.968613	0.940082	0.214441
ASB9	0.986962	0.981402	0.968607	0.940088	0.21455
OR8B4	0.987774	0.980569	0.968581	0.940117	0.215095
CEBPD	0.991193	0.977143	0.968537	0.940149	0.215694
OR4F4	0.98898	0.979322	0.96853	0.940155	0.215801
WARS2	0.985705	0.982523	0.968478	0.940184	0.216346
TSPAN13	0.983815	0.984404	0.968472	0.940187	0.216401
SNAI2	0.986922	0.981298	0.968465	0.940193	0.216509
RAB12	0.986246	0.98195	0.968444	0.94021	0.216837
OR4F17	0.988872	0.979322	0.968424	0.940222	0.217054
EBP	0.98557	0.982497	0.96832	0.940313	0.218796
PSMB3	0.987951	0.980127	0.968317	0.940316	0.21885
NXPH1	0.987057	0.980986	0.968289	0.940344	0.219395
PRR16	0.98611	0.981924	0.968285	0.94035	0.219503
CRYAA	0.989876	0.978154	0.96825	0.940378	0.220046
ALYREF	0.988194	0.979789	0.968222	0.940386	0.220208
KITLG	0.98476	0.983202	0.968218	0.940389	0.220262
CHMP4B	0.988411	0.979555	0.968203	0.940417	0.220804
RAB22A	0.983141	0.984797	0.968194	0.94042	0.220859
YWHAZ	0.984625	0.983306	0.968188	0.940428	0.221023
RAB13	0.98557	0.982341	0.968165	0.940453	0.221568
LIN7B	0.985975	0.981924	0.968152	0.940467	0.22184
RAC1	0.984625	0.983228	0.968111	0.940483	0.222114
MXD4	0.987612	0.980205	0.968062	0.940525	0.22293
HPCAL1	0.990718	0.977117	0.968047	0.94053	0.223039
TPD52L2	0.98422	0.983542	0.968021	0.940541	0.223257
OR10J5	0.987558	0.980153	0.967958	0.940592	0.224292
RNF103-CHMP3	0.984355	0.983333	0.967948	0.940595	0.224347
CD40LG	0.985705	0.98195	0.967913	0.940617	0.224781
OSCAR	0.986246	0.981402	0.967904	0.940627	0.224999
BTG3	0.98476	0.982863	0.967883	0.940641	0.225271
RNF138	0.986381	0.981246	0.967882	0.940646	0.225381
TSPAN7	0.987274	0.980309	0.967833	0.940684	0.226144
MYOG	0.990039	0.977531	0.967794	0.940707	0.226633
OR9I1	0.988804	0.978672	0.967715	0.940742	0.227339
RHOG	0.989116	0.978335	0.967687	0.94076	0.227719
TGIF2LX	0.98974	0.977713	0.967682	0.940763	0.227773
UBTD1	0.989726	0.977713	0.967668	0.940773	0.227991
PRKAB2	0.985165	0.982158	0.967588	0.940836	0.229296
FADD	0.991642	0.975591	0.967436	0.940943	0.23164
RAB1B	0.986787	0.980361	0.967407	0.940953	0.231857
VAPB	0.985705	0.981402	0.967373	0.940973	0.232294
DUSP2	0.987896	0.979166	0.967314	0.940996	0.232783
RAB20	0.990446	0.976625	0.967294	0.941006	0.233
MESDC2	0.988465	0.978569	0.967281	0.941014	0.233165
VDAC2	0.984085	0.982889	0.967246	0.941036	0.233652
CFC1	0.988289	0.978698	0.967237	0.941044	0.233816
VPS25	0.983007	0.983934	0.967213	0.941046	0.23387
ARL8A	0.984625	0.982315	0.967211	0.941051	0.234033
SOCS1	0.99273	0.974274	0.967191	0.941073	0.234469
RGS19	0.988655	0.978257	0.967159	0.941091	0.234851
TSSK3	0.988696	0.978205	0.967148	0.941101	0.235069
RABL2B	0.985165	0.981689	0.967125	0.941115	0.235394
RBM38	0.990677	0.976211	0.96711	0.941128	0.235667
TMED10	0.987084	0.979737	0.967083	0.941142	0.235992
FASLG	0.985975	0.980804	0.967048	0.941159	0.236373
MOB2	0.989564	0.977247	0.967048	0.941162	0.236427
C12orf5	0.986665	0.980101	0.967031	0.941164	0.236482
CDKN1B	0.988858	0.97792	0.967025	0.941167	0.236536
CSH1	0.987152	0.979555	0.96697	0.941208	0.237462
RHOU	0.987517	0.979166	0.966943	0.941239	0.23817
LIN28B	0.985705	0.98096	0.966937	0.941244	0.238279
LHFPL3	0.989754	0.976936	0.966926	0.941254	0.238495
FAM122B	0.98422	0.982393	0.966891	0.941273	0.238929
HSD11B1	0.98611	0.980465	0.966847	0.941292	0.239418
ACER3	0.981257	0.985242	0.966775	0.941325	0.240124
PSMA4	0.983546	0.982941	0.966767	0.94133	0.240234
GNMT	0.986746	0.979737	0.966752	0.941334	0.240343
PPAP2A	0.98449	0.981976	0.966745	0.941342	0.240507
HSPE1-MOB4	0.983141	0.983306	0.966729	0.941358	0.240889
PSMB1	0.985975	0.980465	0.966715	0.941374	0.241322
TAS2R13	0.98449	0.981871	0.966642	0.941395	0.241758
OR12D2	0.989197	0.977195	0.966638	0.941402	0.241922
PDDC1	0.98837	0.97792	0.966548	0.941463	0.243338
ODF3	0.98768	0.978569	0.966512	0.941486	0.243883
ZHX1-C8ORF76	0.982603	0.98362	0.966507	0.94149	0.243992
C1GALT1C1	0.98611	0.980101	0.966488	0.941504	0.24432
TNFAIP8L2-SCNM1	0.981526	0.984613	0.966424	0.941538	0.245191
LAPTM4A	0.98476	0.98135	0.966394	0.941556	0.245572
KIAA1644	0.987653	0.978465	0.966383	0.941568	0.245845
HLA-DRA	0.985975	0.980127	0.966381	0.941572	0.245954
BCL2L1	0.988479	0.977635	0.966372	0.941577	0.246062
CIRBP	0.98476	0.981324	0.966369	0.941579	0.246116
OR1D5	0.987165	0.978776	0.966214	0.941662	0.248123
RHOXF1	0.987382	0.978543	0.966195	0.941668	0.248286
HLA-DMA	0.986435	0.979425	0.966139	0.941697	0.248995
CREM	0.982872	0.982941	0.966105	0.941717	0.249485
RPL13A	0.985165	0.980647	0.966099	0.941721	0.249594
AREG	0.98476	0.981038	0.966087	0.941732	0.249865
MRTO4	0.98476	0.981012	0.966061	0.941749	0.2503
CLDND1	0.98449	0.981272	0.966052	0.941752	0.250355
PXMP4	0.988276	0.977428	0.965968	0.941802	0.251605
DEGS1	0.9853	0.980361	0.96595	0.941812	0.251879
RAB33A	0.988357	0.977324	0.965945	0.941814	0.251932
RPA2	0.98395	0.981663	0.965907	0.941847	0.252748
C14orf166	0.982737	0.982863	0.965896	0.941853	0.252911
PTGFR	0.985705	0.979893	0.965886	0.941855	0.252965
EMX1	0.989062	0.976522	0.96584	0.941893	0.253946
ARHGDIA	0.986678	0.97888	0.96584	0.941896	0.254001
NXPH3	0.988669	0.976884	0.965815	0.941904	0.254218
TMEM106B	0.983815	0.981611	0.965724	0.941946	0.255306
C1QL3	0.989672	0.97572	0.965643	0.941975	0.256067
MEAF6	0.983276	0.982054	0.96563	0.94198	0.256176
RPS9	0.990881	0.974455	0.965568	0.942011	0.256995
OR8G5	0.987774	0.97748	0.965529	0.942025	0.257376
GGPS1	0.98476	0.980465	0.965523	0.942036	0.257649
CABP7	0.987896	0.97735	0.965521	0.94204	0.257757
OR10G8	0.98856	0.976573	0.965402	0.942101	0.259383
REXO2	0.983141	0.98195	0.965395	0.942105	0.259492
OR11H12	0.984355	0.980673	0.965331	0.942142	0.260471
RBM7	0.984895	0.980127	0.965322	0.942146	0.26058
GRB2	0.98422	0.980778	0.965301	0.942168	0.261177
ZFYVE21	0.986962	0.978024	0.965273	0.942182	0.261559
DTYMK	0.989292	0.975694	0.965247	0.942192	0.261831
CRYBB2	0.983681	0.98122	0.965207	0.942204	0.262157
RNF170	0.982199	0.98268	0.965187	0.942212	0.262375
RS1	0.98611	0.978776	0.965181	0.942222	0.262647
RAB5C	0.98422	0.980621	0.965147	0.942237	0.263083
BCAP31	0.984895	0.979867	0.965066	0.942287	0.264441
CLDN15	0.987152	0.977609	0.965049	0.9423	0.264822
SNRPN	0.984895	0.979841	0.96504	0.942302	0.264877
DBP	0.98611	0.978621	0.965028	0.942308	0.265041
GULP1	0.982603	0.982106	0.96502	0.942312	0.265148
EID2	0.989157	0.975565	0.964987	0.942326	0.265527
CD47	0.982737	0.981924	0.964973	0.942332	0.265691
DIRAS1	0.99171	0.972986	0.964919	0.942355	0.266343
ZMYND19	0.98395	0.980595	0.964857	0.942374	0.266889
STX12	0.983007	0.981481	0.964802	0.942395	0.267486
HOXD8	0.985705	0.978776	0.964785	0.942403	0.267704
EMD	0.986881	0.977557	0.964733	0.942424	0.268358
NGF	0.989577	0.974893	0.964732	0.942426	0.268412
SPIN4	0.987057	0.977376	0.964726	0.94243	0.268521
MIP	0.985975	0.978439	0.964717	0.942435	0.268683
MAF1	0.984895	0.979503	0.964708	0.942441	0.268847
FAM78B	0.988438	0.975875	0.964592	0.942488	0.270206
RAB3A	0.988669	0.975591	0.964536	0.942513	0.270911
TFAM	0.981526	0.98268	0.964526	0.942514	0.270966
MSC	0.991261	0.972986	0.964483	0.942528	0.271348
ELMOD1	0.98584	0.978283	0.964431	0.942546	0.271893
TMEM51	0.986854	0.977221	0.964374	0.942568	0.272598
LAPTM5	0.98584	0.97818	0.964329	0.942589	0.273195
RIT1	0.983815	0.980179	0.964315	0.942598	0.273467
ADM	0.988357	0.975617	0.964257	0.942624	0.274228
RAB6B	0.985165	0.97875	0.96423	0.942635	0.274554
SNRPB	0.983007	0.980856	0.964188	0.942664	0.275421
FCGR1B	0.982333	0.981507	0.964167	0.942671	0.275639
TNFSF13	0.983141	0.980699	0.964166	0.942675	0.275748
MBNL3	0.98476	0.979088	0.964166	0.942678	0.275856
MPZ	0.986719	0.977117	0.96414	0.942691	0.276237
ITM2A	0.985705	0.978102	0.96412	0.942698	0.276455
OR2A4	0.986962	0.976832	0.964097	0.942714	0.276946
PABPN1	0.981391	0.982367	0.964086	0.942716	0.277001
EIF6	0.985435	0.978335	0.964086	0.942718	0.277055
MFAP4	0.985165	0.978569	0.964051	0.942728	0.277381
KLK13	0.98503	0.978698	0.964047	0.942732	0.277491
UBE2S	0.989564	0.974197	0.96403	0.942743	0.277818
OR11H1	0.984355	0.979347	0.964025	0.94275	0.278036
OR2T34	0.986949	0.976755	0.964007	0.942759	0.278308
OR2T5	0.986895	0.976729	0.963928	0.942785	0.279124
OR2A1	0.987463	0.97616	0.963922	0.942791	0.279288
PDCD6	0.987125	0.97647	0.963898	0.942801	0.279613
TBC1D26	0.983276	0.980257	0.963864	0.942814	0.279993
TIMM23	0.980719	0.982654	0.963708	0.942882	0.28211
SLA	0.982064	0.981272	0.963672	0.94289	0.28238
IGFBP2	0.98557	0.977687	0.963579	0.942932	0.283688
RSPO2	0.981795	0.981428	0.963562	0.942937	0.28385
HVCN1	0.985165	0.978024	0.963515	0.942955	0.284446
ATF1	0.98193	0.981246	0.963515	0.942957	0.2845
ADO	0.988818	0.974403	0.963507	0.942959	0.284554
FNDC4	0.985705	0.977402	0.96343	0.942981	0.285368
PNRC1	0.986246	0.97678	0.963345	0.943008	0.286183
GAR1	0.980316	0.98268	0.963337	0.94301	0.286237
TSPAN12	0.982603	0.980387	0.963331	0.943013	0.286346
CLPP	0.98653	0.97647	0.963316	0.943016	0.286454
C1QL4	0.990541	0.972471	0.963272	0.943033	0.286998
MAGEA12	0.98584	0.977091	0.963256	0.943043	0.287324
OR2A42	0.987071	0.975798	0.963181	0.943075	0.288358
RPS3A	0.984355	0.978465	0.963157	0.943082	0.288631
SURF4	0.985975	0.976832	0.963132	0.943088	0.288795
PRELID1	0.983007	0.979763	0.963114	0.943096	0.289066
JUND	0.988533	0.974248	0.963077	0.943111	0.289556
RHOV	0.987138	0.975539	0.962992	0.943134	0.290319
TIPRL	0.982333	0.980309	0.96299	0.943136	0.290373
POU1F1	0.980988	0.981585	0.962923	0.943156	0.291025
CDC34	0.987829	0.974764	0.9629	0.943167	0.291403
C16orf86	0.987057	0.975462	0.962836	0.943187	0.292055
OR4K15	0.987639	0.974868	0.962817	0.943198	0.292437
MAPRE3	0.98449	0.977972	0.962804	0.9432	0.292492
CAPZB	0.983411	0.979036	0.962795	0.943201	0.292547
OR2T35	0.987504	0.974971	0.962787	0.943203	0.2926
CALB1	0.979242	0.983176	0.962767	0.943211	0.29287
POU2AF1	0.98476	0.977609	0.96271	0.943233	0.293631
OR2T2	0.987558	0.974816	0.962687	0.943245	0.294013
PHOSPHO1	0.988628	0.973758	0.962685	0.943246	0.294067
RPL18	0.985165	0.977169	0.962672	0.943251	0.294228
HSD17B8	0.982333	0.979945	0.962633	0.943269	0.294826
ECHS1	0.983815	0.978465	0.962629	0.94327	0.294881
BABAM1	0.987829	0.974429	0.962569	0.943302	0.295967
PRRX1	0.985975	0.976108	0.962418	0.943344	0.297433
RAB24	0.983546	0.978439	0.962339	0.943368	0.298251
PGAM1	0.986435	0.975565	0.962331	0.943371	0.29836
RPSA	0.98449	0.977428	0.962268	0.943394	0.299177
RAB11B	0.987517	0.974429	0.962265	0.943396	0.299231
CNOT8	0.980988	0.980882	0.962233	0.94341	0.299721
DOLPP1	0.984355	0.97748	0.962187	0.943427	0.300374
NSA2	0.981257	0.980543	0.962165	0.943436	0.300646
PRR7	0.988614	0.973243	0.962162	0.943439	0.300754
KCNIP3	0.98476	0.977039	0.962149	0.943444	0.300917
LYSMD3	0.982468	0.979296	0.962126	0.94345	0.301135
ATP1B3	0.98193	0.979815	0.962109	0.943456	0.301354
VAX1	0.985705	0.976004	0.962052	0.943474	0.302009
CRHR1	0.984625	0.977065	0.962043	0.943476	0.302063
GPR65	0.984625	0.977039	0.962017	0.943489	0.302553
YWHAQ	0.983276	0.978335	0.961974	0.943504	0.303097
ELMOD2	0.979511	0.98208	0.961958	0.943507	0.303205
SLC25A36	0.981795	0.979789	0.961952	0.94351	0.303314
CD40	0.983007	0.978569	0.96194	0.943515	0.303477
GSG1L	0.981391	0.980179	0.961939	0.943516	0.303532
E2F6	0.982199	0.979347	0.961914	0.94353	0.304021
RPS4X	0.984085	0.977454	0.961898	0.943535	0.304184
OSR1	0.98856	0.972986	0.961855	0.94355	0.304728
TOB1	0.9853	0.976185	0.961835	0.943554	0.304891
IL2RA	0.983681	0.977791	0.961834	0.943556	0.304944
KCNK12	0.986246	0.975229	0.961815	0.943567	0.305381
SCAMP1	0.984625	0.976832	0.961813	0.943569	0.305436
MAGEA4	0.984895	0.976548	0.961796	0.943582	0.305925
HSD17B10	0.983276	0.978154	0.961795	0.943584	0.30598
DUSP9	0.986624	0.974816	0.961777	0.943588	0.306144
IGLON5	0.986787	0.974635	0.961757	0.943599	0.306524
AP1AR	0.979242	0.98208	0.961694	0.943619	0.307285
TRIB1	0.983276	0.977972	0.961617	0.943637	0.307936
RP2	0.983546	0.977687	0.9616	0.943647	0.308316
RNF41	0.98557	0.975642	0.961564	0.94366	0.308806
KIR2DL4	0.984625	0.976573	0.961558	0.943662	0.30897
CCR4	0.985705	0.975462	0.961517	0.943678	0.309461
TSPAN14	0.984085	0.977039	0.96149	0.943684	0.309679
RPS6	0.9853	0.975823	0.961479	0.943687	0.309788
UBFD1	0.98449	0.976625	0.961478	0.943688	0.309842
FAM120AOS	0.987355	0.973758	0.961445	0.943691	0.309951
BZW1	0.983276	0.977791	0.961438	0.943694	0.31006
SEC22A	0.981122	0.979919	0.961421	0.943697	0.310168
OR6B2	0.988086	0.972986	0.961393	0.943704	0.310494
NFKBIE	0.981526	0.979477	0.961382	0.943713	0.310818
GSTT2B	0.983141	0.977817	0.961332	0.94373	0.311472
VPS26A	0.980854	0.980049	0.961285	0.943748	0.312178
FBXO8	0.982199	0.978698	0.961276	0.943751	0.312287
M6PR	0.980988	0.979893	0.961263	0.943754	0.312396
C15orf26	0.983276	0.977583	0.961234	0.943761	0.312669
OR2T8	0.987125	0.973758	0.961221	0.943764	0.312778
SPI1	0.986489	0.974377	0.961212	0.94377	0.312996
KIAA0247	0.985435	0.97541	0.961203	0.943773	0.313104
TPM1	0.981526	0.979244	0.961153	0.943788	0.313701
MAGEB3	0.985165	0.975565	0.961092	0.943811	0.314626
PRPS1	0.985165	0.975565	0.961092	0.943812	0.314626
OR3A2	0.98422	0.976496	0.961087	0.943814	0.314681
IER2	0.989062	0.971699	0.961071	0.943819	0.314898
CYB561	0.986246	0.974455	0.961052	0.943822	0.315006
ARMC1	0.982737	0.97792	0.961039	0.943825	0.315115
SLC39A9	0.983141	0.97748	0.961001	0.943836	0.315549
NDUFS7	0.986854	0.973784	0.960983	0.94384	0.315712
FAS	0.980854	0.979711	0.960953	0.943847	0.315981
DCUN1D3	0.98476	0.975798	0.960926	0.943857	0.316361
RBP4	0.983546	0.976962	0.960886	0.943874	0.317014
RELL1	0.987558	0.972986	0.960879	0.943877	0.317124
NOG	0.989591	0.970929	0.960822	0.943895	0.317832
CBX7	0.983411	0.976936	0.960729	0.943915	0.318649
SYNGR1	0.987639	0.972728	0.960704	0.943921	0.318866
FGF17	0.988628	0.971699	0.960649	0.943935	0.319413
SOX14	0.988858	0.971442	0.960619	0.943943	0.319738
OTX2	0.983546	0.976677	0.960606	0.943948	0.319956
P2RY10	0.985435	0.97479	0.960592	0.943951	0.320064
TMEM55B	0.979779	0.980413	0.960588	0.943952	0.320118
GJB1	0.986692	0.973501	0.960545	0.943967	0.320714
C1GALT1	0.983007	0.977065	0.960462	0.943993	0.321744
GGH	0.982333	0.977713	0.96044	0.944001	0.322069
GPR85	0.98449	0.975513	0.960383	0.944021	0.322884
RNF208	0.988316	0.971699	0.960346	0.944031	0.323267
TMEM164	0.984895	0.975074	0.960345	0.944032	0.323321
CLDN3	0.989808	0.970159	0.960271	0.944051	0.324082
RRAGC	0.980048	0.979815	0.960265	0.944055	0.324245
RHOXF2	0.9853	0.974532	0.960206	0.944066	0.324736
RHOXF2B	0.9853	0.974532	0.960206	0.944067	0.324736
ABHD13	0.982872	0.976936	0.960203	0.944068	0.324791
DNAJC8	0.979108	0.980673	0.960185	0.944075	0.325062
RCHY1	0.980048	0.979685	0.960138	0.944083	0.325388
REEP2	0.98395	0.97572	0.96006	0.944091	0.325714
TRIM74	0.984625	0.975048	0.960057	0.944092	0.325823
CCNG2	0.980988	0.978646	0.960041	0.944103	0.3262
CNN3	0.982064	0.977557	0.960024	0.944105	0.326309
DNAJC9	0.981526	0.97805	0.959981	0.944114	0.326689
ELAC1	0.983815	0.975668	0.959877	0.944141	0.327776
CENPL	0.979645	0.979815	0.959871	0.944147	0.328048
A4GNT	0.984085	0.975384	0.959861	0.94415	0.328157
FAM46D	0.984625	0.974842	0.959853	0.944152	0.328265
HLF	0.985975	0.973501	0.959848	0.944158	0.328481
MAGEC2	0.985165	0.974248	0.959795	0.944167	0.328861
EXOSC3	0.98476	0.974635	0.959782	0.944171	0.329026
PHB	0.983681	0.975694	0.959771	0.944173	0.329134
AKTIP	0.980719	0.978517	0.95965	0.944198	0.330221
SERTAD2	0.987057	0.972213	0.95963	0.9442	0.33033
TOMM34	0.980719	0.978491	0.959625	0.944202	0.330385
SRSF9	0.98449	0.974739	0.95962	0.944205	0.330549
FAM110A	0.986435	0.972728	0.959533	0.944226	0.331418
RAX	0.98449	0.974635	0.959518	0.944229	0.331527
MAGEB10	0.984085	0.974997	0.95948	0.944235	0.331855
DPM1	0.980182	0.978802	0.959404	0.94425	0.332508
FAM86B1	0.986814	0.972213	0.959393	0.944252	0.332562
NKX2-3	0.985165	0.973836	0.959389	0.944253	0.332616
DKK2	0.982737	0.976211	0.959359	0.944262	0.333052
CCNI	0.982333	0.976573	0.959321	0.944277	0.33365
TNFSF14	0.98422	0.974635	0.959256	0.94429	0.334195
QPRT	0.986381	0.972471	0.959226	0.944292	0.334304
MYPOP	0.98584	0.972986	0.959208	0.944297	0.334522
CRX	0.9853	0.973501	0.95919	0.944301	0.334685
OR10H1	0.988411	0.970415	0.959169	0.944303	0.334793
CD2	0.982872	0.975875	0.95916	0.944306	0.334902
CA8	0.979779	0.97888	0.959086	0.944318	0.335446
GPR27	0.987531	0.971185	0.959075	0.944321	0.335555
NEUROD6	0.982333	0.976211	0.958965	0.944351	0.336862
ZC2HC1A	0.979242	0.97927	0.958942	0.944357	0.337133
GLRX3	0.977499	0.980856	0.958786	0.944391	0.338654
PRMT2	0.983007	0.975358	0.958784	0.944392	0.338709
OLIG3	0.989794	0.968621	0.958736	0.944402	0.339143
OSR2	0.986394	0.971956	0.958732	0.944403	0.339198
NKX6-1	0.98611	0.972213	0.95871	0.944407	0.339361
HS3ST5	0.984355	0.973939	0.958701	0.944411	0.33958
GPR174	0.980182	0.978076	0.958692	0.944414	0.339689
PARD6B	0.9853	0.972986	0.958682	0.94442	0.33996
MEMO1	0.978706	0.979503	0.958645	0.94443	0.340397
DNAJB4	0.980854	0.97735	0.958637	0.944433	0.34056
CITED2	0.988872	0.96939	0.958602	0.944443	0.340997
RRAGD	0.98166	0.976496	0.958587	0.944449	0.341271
LBX2	0.987287	0.970929	0.958585	0.944452	0.341433
CLDN5	0.987761	0.970415	0.958538	0.944463	0.341923
AWAT2	0.98193	0.97616	0.95852	0.944475	0.342467
TAL1	0.986435	0.971699	0.958518	0.944476	0.342522
CTSS	0.980719	0.97735	0.958506	0.944481	0.342738
RELL2	0.983815	0.974197	0.95843	0.944489	0.34312
CDX2	0.9853	0.972728	0.958429	0.944492	0.343282
TOB2	0.986827	0.971185	0.958392	0.94451	0.344043
BMI1	0.978706	0.979244	0.958391	0.944512	0.344153
SPARC	0.983141	0.974816	0.958382	0.944514	0.344262
VASH2	0.98193	0.975979	0.958342	0.944522	0.34459
CHORDC1	0.978303	0.979555	0.958302	0.944529	0.344917
DMRT1	0.984355	0.973501	0.95827	0.944539	0.345405
TAF7	0.981257	0.976522	0.958219	0.944547	0.345841
IFNGR2	0.981257	0.976522	0.958219	0.944549	0.345841
PPAPDC2	0.98584	0.971956	0.958194	0.944555	0.346112
CD226	0.982333	0.975384	0.958152	0.944562	0.346439
NPY1R	0.982333	0.975255	0.958025	0.944597	0.348066
VPS37B	0.9853	0.972213	0.957922	0.944614	0.348826
EIF2S2	0.977366	0.980075	0.957892	0.944626	0.349425
SLC39A8	0.979376	0.978024	0.957853	0.944631	0.349644
RASD2	0.989347	0.96811	0.957796	0.944642	0.350131
TRIM13	0.983141	0.974197	0.957773	0.944645	0.350294
TRNAU1AP	0.979376	0.97792	0.957752	0.944653	0.350672
MEOX2	0.983815	0.973501	0.957745	0.944654	0.350781
TMEFF1	0.977366	0.979867	0.957688	0.944663	0.351162
AKAP5	0.982333	0.974893	0.95767	0.944668	0.351378
FAM122A	0.986854	0.970415	0.957658	0.944669	0.351432
DMRTB1	0.98476	0.972471	0.95765	0.944672	0.351542
ELOVL4	0.979376	0.977791	0.957625	0.944677	0.351812
RTP1	0.986557	0.970672	0.957623	0.944678	0.351866
CPSF4	0.983007	0.974145	0.957591	0.944689	0.352354
PPP2CB	0.981257	0.975849	0.957559	0.944697	0.352734
KCTD5	0.982468	0.974609	0.957523	0.944705	0.353114
UBIAD1	0.984625	0.972471	0.957519	0.944706	0.353223
SHOX	0.984625	0.972471	0.957519	0.944707	0.353223
ARX	0.979376	0.977661	0.957498	0.944713	0.353495
NPDC1	0.98395	0.972986	0.957369	0.944738	0.35469
HOXA11	0.986246	0.970672	0.957321	0.94475	0.355288
OVOL1	0.985165	0.971699	0.957284	0.944759	0.355777
DSCR3	0.984085	0.972728	0.957247	0.944768	0.356158
VPS37A	0.977366	0.979322	0.957155	0.944783	0.356866
ZNF330	0.978706	0.977946	0.957121	0.94479	0.357247
TNFRSF14	0.983681	0.972986	0.957107	0.944792	0.35741
SLC25A5	0.984085	0.972471	0.956994	0.944827	0.359094
IGFBP5	0.986638	0.969902	0.956942	0.94484	0.35969
EFNB1	0.98449	0.971956	0.956881	0.944851	0.360233
OTUD6A	0.98833	0.96811	0.956812	0.944864	0.360882
DUSP4	0.985435	0.970929	0.956787	0.944871	0.361263
BHLHE22	0.984895	0.971442	0.956768	0.944878	0.361586
MUC1	0.977366	0.978906	0.956749	0.944882	0.361804
LASP1	0.983546	0.972728	0.956723	0.944887	0.362021
ZNF121	0.980854	0.975358	0.956684	0.944898	0.362566
LPAR3	0.98611	0.970159	0.956684	0.944899	0.362675
KCNJ13	0.981391	0.974816	0.956676	0.944901	0.36273
TMOD3	0.978974	0.977195	0.956648	0.944909	0.363111
PTAR1	0.981122	0.975048	0.956642	0.944911	0.36322
MAGEA11	0.980585	0.975487	0.956548	0.944931	0.364249
CBWD1	0.976161	0.979867	0.956508	0.944941	0.364739
OTP	0.98557	0.970415	0.956412	0.944952	0.36528
NEK7	0.97683	0.979088	0.956402	0.944954	0.365388
IER5	0.98814	0.967854	0.956375	0.944959	0.365659
RCE1	0.982603	0.973243	0.956311	0.944976	0.366524
GPR143	0.979242	0.976573	0.956302	0.94498	0.366688
SCO1	0.982064	0.973758	0.956293	0.944983	0.366851
OMG	0.981526	0.974274	0.956275	0.944988	0.367122
ZNF367	0.982199	0.973501	0.956171	0.945004	0.367994
ATP6AP2	0.980585	0.975023	0.956092	0.945018	0.368644
CBWD5	0.977098	0.978465	0.956056	0.945022	0.368861
TOMM40L	0.980585	0.974971	0.956042	0.945025	0.369023
LANCL3	0.981795	0.973758	0.956031	0.945026	0.369078
SH3GLB1	0.979779	0.975694	0.955965	0.945039	0.36973
B3GNT5	0.98193	0.973501	0.955909	0.945055	0.370547
FHL3	0.982872	0.972471	0.955814	0.945066	0.371145
PQBP1	0.982333	0.972986	0.955796	0.945075	0.371635
LPPR1	0.980719	0.974558	0.955768	0.945087	0.372235
CCR1	0.982737	0.972471	0.955683	0.945106	0.373263
YOD1	0.98449	0.970672	0.955617	0.945119	0.373913
MSTN	0.980451	0.974661	0.955607	0.945122	0.374075
RNF126	0.98395	0.971185	0.955598	0.945124	0.374184
PCGF2	0.982872	0.972213	0.955561	0.945129	0.374456
LTB4R	0.988072	0.967087	0.955552	0.94513	0.37451
PRKACB	0.977901	0.977143	0.955549	0.945132	0.374619
SLC25A1	0.981795	0.973243	0.955525	0.945142	0.375109
HES1	0.985165	0.969902	0.955513	0.945148	0.375434
DLX5	0.984895	0.970159	0.955504	0.945149	0.375489
SPSB1	0.984355	0.970672	0.955486	0.945153	0.375705
FJX1	0.984085	0.970929	0.955476	0.945154	0.37576
JUNB	0.98611	0.968877	0.95542	0.945164	0.376304
TRADD	0.98422	0.970672	0.955355	0.94518	0.377169
IER5L	0.983411	0.971442	0.955327	0.945183	0.377331
COPE	0.982064	0.972728	0.955281	0.945194	0.377929
MEF2BNB-MEF2B	0.979779	0.974997	0.955281	0.945195	0.377983
SERTAD4	0.978571	0.976185	0.955267	0.945198	0.378145
LBX1	0.988005	0.966832	0.955235	0.94521	0.378743
UPRT	0.979108	0.975617	0.955234	0.945211	0.378798
LHX8	0.980585	0.974119	0.955207	0.945216	0.379122
LRRC73	0.98557	0.969133	0.955149	0.94523	0.379825
FAIM2	0.977901	0.976729	0.955144	0.945231	0.37988
MEF2B	0.979645	0.974971	0.955125	0.945236	0.380152
NECAB3	0.978974	0.975591	0.955078	0.945248	0.380804
HNRNPA0	0.986246	0.968366	0.955046	0.945253	0.381075
PHOX2B	0.985975	0.968621	0.955037	0.945255	0.381184
WNT8A	0.980988	0.973501	0.954993	0.945266	0.38189
AQP3	0.980988	0.973501	0.954993	0.945267	0.38189
GPS2	0.978437	0.976004	0.954959	0.945278	0.382488
RPS10-NUDT3	0.979645	0.974713	0.954872	0.94529	0.383194
CLVS1	0.981122	0.973243	0.954871	0.945292	0.3833
PPAPDC3	0.987626	0.966832	0.954868	0.945294	0.383409
ST8SIA4	0.978974	0.975332	0.954825	0.945298	0.383625
UBE2J1	0.977767	0.97647	0.95476	0.945312	0.384384
PIM2	0.981257	0.972986	0.954749	0.945316	0.384602
SF3A2	0.980719	0.973501	0.954731	0.945323	0.384985
STRADB	0.977633	0.976548	0.954706	0.945327	0.38531
NTF3	0.982468	0.971699	0.954663	0.945337	0.385799
ISG20L2	0.980854	0.973243	0.954609	0.945343	0.386126
LRRC55	0.983141	0.970929	0.95456	0.945352	0.386615
TNMD	0.977366	0.976625	0.95452	0.945358	0.386941
IRF1	0.978303	0.975591	0.954424	0.945381	0.388244
METRNL	0.985975	0.967854	0.95428	0.945405	0.389607
UCHL5	0.975092	0.978646	0.95427	0.945409	0.389824
ERGIC1	0.981795	0.971956	0.954262	0.94541	0.389878
GPR12	0.984625	0.969133	0.954233	0.945414	0.390148
SIX6	0.983546	0.970159	0.954195	0.945418	0.390362
HOXA10	0.983276	0.970415	0.954186	0.94542	0.390471
NFYC	0.978303	0.975332	0.954171	0.945421	0.390526
PPT2	0.981122	0.972471	0.954113	0.94543	0.391014
DLX2	0.98476	0.968877	0.954111	0.94543	0.391122
HOXA5	0.9881	0.965557	0.954066	0.94544	0.391609
CCDC101	0.983141	0.970415	0.954055	0.945444	0.391826
CDK5R1	0.987301	0.966322	0.95405	0.945445	0.391881
SLX1A	0.983815	0.969646	0.953953	0.945462	0.392911
SLX1B	0.983815	0.969646	0.953953	0.945463	0.392911
C1orf51	0.981391	0.971956	0.95387	0.945476	0.393669
CNN1	0.982603	0.970672	0.953785	0.945491	0.3947
DHRS3	0.985705	0.967598	0.953767	0.945498	0.395081
SYP	0.981257	0.971956	0.953739	0.945506	0.395463
HRH2	0.984625	0.968621	0.953729	0.945509	0.395627
SSB	0.977098	0.976082	0.953728	0.94551	0.395682
MEF2A	0.978974	0.974197	0.953713	0.945511	0.395791
KCNK1	0.984085	0.969133	0.95371	0.945515	0.396114
SYAP1	0.978571	0.974455	0.953574	0.945547	0.39785
CCRN4L	0.977767	0.975177	0.953497	0.94556	0.398718
HMX3	0.984625	0.968366	0.953477	0.945563	0.398882
TMEM115	0.984355	0.968621	0.953467	0.945568	0.399155
C1QTNF4	0.987477	0.965557	0.953465	0.945569	0.399209
UBA5	0.974825	0.978024	0.953402	0.945577	0.399698
HS3ST4	0.982199	0.970672	0.953393	0.945579	0.399805
SRM	0.98193	0.970929	0.953383	0.945582	0.400077
NUDC	0.978571	0.974248	0.953372	0.945586	0.400239
SEC13	0.978437	0.974377	0.953367	0.945588	0.4004
CXXC5	0.986827	0.966067	0.953341	0.945594	0.400725
GPR137C	0.980585	0.972213	0.953338	0.945595	0.400779
SLC35A2	0.983411	0.96939	0.953308	0.945601	0.401104
C9orf41	0.976161	0.976548	0.953268	0.945603	0.401266
PHYHIP	0.985705	0.967087	0.953263	0.945604	0.401321
GIMAP1	0.986421	0.966322	0.9532	0.945614	0.40192
BRS3	0.979913	0.972728	0.953189	0.945619	0.402192
KLF3	0.982468	0.970159	0.95315	0.945629	0.402843
CACNG7	0.98557	0.967087	0.953132	0.945634	0.403115
GPR88	0.98503	0.967598	0.953113	0.945636	0.403224
ALX1	0.980316	0.972213	0.953077	0.945643	0.403658
DND1	0.98395	0.968621	0.953075	0.945644	0.403712
TOLLIP	0.982064	0.970415	0.95301	0.945656	0.404474
ZBTB37	0.978035	0.974377	0.952975	0.945662	0.404799
PURB	0.984355	0.96811	0.952964	0.945665	0.40507
GATA4	0.980182	0.972213	0.952946	0.945674	0.405559
HIF1AN	0.976295	0.975979	0.952843	0.945689	0.406427
HTR1D	0.98422	0.96811	0.952833	0.945693	0.406696
ATAD1	0.977499	0.974713	0.952781	0.945701	0.407186
HEPACAM	0.978974	0.973243	0.952779	0.945702	0.407294
ZDHHC15	0.976696	0.975487	0.952755	0.945705	0.407457
FAM49A	0.974825	0.97735	0.952745	0.945708	0.407619
FGFR1OP	0.975092	0.976988	0.952653	0.945717	0.408162
SLC25A28	0.981122	0.970929	0.9526	0.945729	0.40898
OPCML	0.981122	0.970929	0.9526	0.94573	0.40898
H2AFY	0.983141	0.968877	0.952544	0.945739	0.409523
RBMX2	0.978974	0.972986	0.952527	0.94574	0.409577
SNRNP40	0.978706	0.973243	0.952518	0.945743	0.409849
RALY	0.982064	0.969902	0.952506	0.945749	0.410175
ARG2	0.976696	0.975229	0.952503	0.945751	0.410284
ST6GALNAC5	0.981795	0.970159	0.952497	0.945752	0.410338
STX3	0.97683	0.975074	0.952482	0.945754	0.410445
TTPAL	0.979376	0.972471	0.952415	0.945763	0.41104
SFXN1	0.978035	0.973758	0.95237	0.945773	0.411636
MXI1	0.974691	0.977091	0.952362	0.945774	0.41169
ZNF566	0.977499	0.974274	0.952352	0.945775	0.4118
ST6GAL1	0.980585	0.971185	0.95233	0.945779	0.412017
FBXO22	0.979779	0.971956	0.952302	0.945782	0.412179
COPS6	0.978974	0.972728	0.952275	0.945788	0.41256
FA2H	0.978437	0.973243	0.952257	0.94579	0.412724
GALNT9	0.978571	0.972986	0.952136	0.945805	0.413643
PURA	0.9853	0.966322	0.952117	0.945812	0.414189
TSKU	0.986584	0.965047	0.9521	0.945816	0.414352
WBSCR22	0.976696	0.97479	0.952074	0.945819	0.414515
DDAH2	0.983141	0.968366	0.95204	0.945825	0.414948
PCBP1	0.986246	0.965302	0.952025	0.94583	0.415219
STRAP	0.975359	0.976056	0.952005	0.945836	0.415596
MYD88	0.980988	0.970415	0.951966	0.945843	0.416031
GPR63	0.980719	0.970672	0.951957	0.945843	0.416086
CRK	0.980854	0.970415	0.951835	0.945862	0.417279
TOR1B	0.983141	0.96811	0.951789	0.94587	0.417877
ZNF385A	0.97576	0.97541	0.951766	0.945876	0.418147
KHDRBS3	0.977098	0.974068	0.951759	0.945879	0.418365
PITX3	0.986489	0.964793	0.951757	0.94588	0.418418
FYTTD1	0.978437	0.972728	0.951754	0.945881	0.418473
NTM	0.982064	0.969133	0.951751	0.945882	0.418527
EN1	0.985435	0.965812	0.951744	0.945882	0.418582
ZNF787	0.985165	0.966067	0.951735	0.945885	0.418744
B3GNT2	0.980719	0.970415	0.951705	0.94589	0.419178
TNFSF12-TNFSF13	0.975226	0.975875	0.951698	0.945893	0.419286
USP12	0.978035	0.972986	0.951614	0.945906	0.4201
RNFT2	0.979242	0.971699	0.951529	0.94592	0.421077
WDR92	0.978437	0.972471	0.951502	0.945925	0.421347
MAGT1	0.977098	0.973784	0.951482	0.94593	0.421675
VASH1	0.98449	0.966322	0.951334	0.945954	0.423251
RPRD1B	0.97683	0.973887	0.951322	0.945958	0.423523
KCNJ10	0.982333	0.968366	0.951258	0.945967	0.424068
MORF4L1	0.974691	0.975901	0.951202	0.945976	0.424723
HS2ST1	0.97683	0.973758	0.951196	0.945978	0.424886
LAMP3	0.980182	0.970415	0.951183	0.94598	0.424995
SPDEF	0.983276	0.967343	0.951165	0.945981	0.42505
TAPT1	0.976964	0.973501	0.951075	0.945992	0.425756
SGPP1	0.980585	0.969902	0.951071	0.945993	0.42581
GNB4	0.976696	0.973758	0.951066	0.945994	0.425865
NFKBID	0.980048	0.970415	0.951053	0.945997	0.426081
KCMF1	0.982603	0.967854	0.951016	0.945999	0.426298
ST8SIA2	0.981257	0.969133	0.950969	0.946007	0.426733
DEDD	0.981122	0.969133	0.950839	0.946031	0.42841
SEH1L	0.977366	0.972728	0.950711	0.946049	0.429549
ADIPOR1	0.980451	0.969646	0.95069	0.946052	0.429924
SCD	0.980451	0.969646	0.95069	0.946054	0.429924
MESDC1	0.986895	0.963267	0.950643	0.946058	0.430197
ZFP36L1	0.9853	0.964793	0.95061	0.946063	0.430523
ST3GAL1	0.981122	0.968877	0.950587	0.946067	0.430794
SLC7A6OS	0.982333	0.967598	0.950504	0.946078	0.431499
ZFP36	0.983815	0.966067	0.950431	0.946094	0.432586
P2RY1	0.982737	0.967087	0.950393	0.946101	0.433072
DCAF7	0.979108	0.970672	0.950393	0.946102	0.433235
C6orf136	0.978571	0.971185	0.950374	0.946106	0.433452
TRAM1	0.975626	0.974068	0.950326	0.946112	0.433833
DLK2	0.983411	0.966322	0.950291	0.946118	0.434214
DMRTC2	0.978706	0.970929	0.950253	0.946121	0.434487
ADIPOR2	0.977098	0.972471	0.950199	0.946132	0.435191
DIO3	0.987355	0.962251	0.950084	0.946151	0.436544
PRAMEF14	0.980854	0.968621	0.950076	0.946153	0.436654
GPR173	0.98422	0.965302	0.950069	0.946154	0.436708
CHN1	0.980182	0.969133	0.949927	0.946173	0.438062
LETMD1	0.979376	0.969902	0.949899	0.946178	0.438387
MAT2A	0.978571	0.970672	0.949872	0.94618	0.438551
RRS1	0.9853	0.964029	0.949858	0.946183	0.438711
UBXN1	0.979242	0.969902	0.949769	0.94619	0.439253
SLC25A22	0.982064	0.967087	0.949742	0.946192	0.439415
BUB3	0.977098	0.971956	0.949696	0.946199	0.439902
ACTG2	0.979645	0.96939	0.949657	0.946207	0.440447
SIX2	0.98584	0.963267	0.949627	0.946212	0.440828
GRINA	0.977767	0.971185	0.949593	0.946214	0.440991
BMP10	0.980316	0.968621	0.949555	0.946218	0.44126
NUDCD3	0.978974	0.969902	0.949509	0.946229	0.442074
YIPF3	0.977901	0.970929	0.949472	0.946234	0.442399
FCGRT	0.980988	0.967854	0.949453	0.946239	0.442723
SULT2B1	0.983815	0.965047	0.949428	0.946242	0.44294
CCDC112	0.972557	0.976108	0.949321	0.946253	0.44381
SERPINE2	0.980048	0.968621	0.949295	0.946257	0.444082
GDF7	0.983141	0.965557	0.949279	0.946262	0.44441
ZC3H12D	0.981257	0.967343	0.949212	0.946276	0.445496
FAM118A	0.981257	0.967343	0.949212	0.946276	0.445496
ELK1	0.983007	0.965557	0.949149	0.946288	0.446366
C19orf47	0.982199	0.966322	0.94912	0.946291	0.446582
TMOD1	0.977499	0.970929	0.949082	0.946294	0.446853
KLF5	0.976964	0.971442	0.949064	0.946298	0.447124
RASSF8	0.973624	0.974764	0.949054	0.9463	0.447232
SUPT7L	0.980048	0.968366	0.949044	0.9463	0.447339
FAM46C	0.982872	0.965557	0.949019	0.946305	0.44761
NFE2	0.982064	0.966322	0.94899	0.94631	0.44799
ATOH8	0.984895	0.963521	0.948967	0.946312	0.448152
PLAGL1	0.980988	0.967343	0.948952	0.946313	0.448207
PPM1L	0.979913	0.968366	0.948914	0.946316	0.448423
FAXC	0.979376	0.968877	0.948896	0.946321	0.448802
SLC25A11	0.981391	0.966832	0.948841	0.946325	0.449072
HNRNPF	0.982064	0.966067	0.948739	0.946336	0.44983
ZFPL1	0.981257	0.966832	0.948711	0.94634	0.450155
PPP4C	0.980182	0.967854	0.948673	0.946342	0.450264
SLC30A2	0.97884	0.969133	0.948626	0.94635	0.450914
TMEM184B	0.982199	0.965812	0.948619	0.946351	0.450969
PELO	0.983141	0.964793	0.948528	0.946364	0.451885
PRAMEF17	0.979242	0.968621	0.948515	0.946368	0.452156
GATA1	0.981526	0.966322	0.94847	0.946374	0.45259
OPN3	0.979376	0.968366	0.948394	0.946386	0.453512
PGGT1B	0.975226	0.972471	0.948378	0.946388	0.453676
WNT2	0.978974	0.968621	0.948255	0.946402	0.454764
AP3M1	0.977366	0.970159	0.9482	0.946413	0.455577
PIGU	0.977366	0.970159	0.9482	0.946414	0.455577
NAP1L2	0.980182	0.967343	0.948172	0.946418	0.455848
BCL2L2-PABPN1	0.978035	0.96939	0.948097	0.946426	0.456552
FOSB	0.981795	0.965557	0.947979	0.946442	0.45764
SYT2	0.979913	0.967343	0.947912	0.94645	0.458238
PITX2	0.982468	0.964793	0.947878	0.946454	0.458565
SP7	0.981122	0.966067	0.94783	0.94646	0.458998
ZDHHC9	0.976696	0.970415	0.947801	0.946466	0.459487
PRAMEF6	0.979779	0.967343	0.947782	0.94647	0.459756
WNT6	0.983141	0.964029	0.947777	0.94647	0.459865
POU3F4	0.983141	0.964029	0.947777	0.946471	0.459865
OPN1MW	0.979108	0.967854	0.947634	0.946492	0.461488
OPN1MW2	0.979108	0.967854	0.947634	0.946493	0.461488
HOXC10	0.983141	0.963775	0.947527	0.94651	0.46284
ZNF385D	0.978169	0.968621	0.947476	0.946515	0.463166
GORASP1	0.977901	0.968877	0.947467	0.946516	0.463274
CCR7	0.983007	0.963775	0.947397	0.946525	0.463982
INTS12	0.97576	0.970929	0.947393	0.946526	0.464036
CHST14	0.982603	0.964029	0.947258	0.94654	0.46512
SOX17	0.983546	0.963013	0.947167	0.946554	0.466148
EIF3F	0.979779	0.966577	0.947032	0.946572	0.467616
SDC3	0.983141	0.963267	0.947028	0.946573	0.467725
PRAMEF10	0.979511	0.966832	0.947022	0.946575	0.467833
SYT1	0.975894	0.970415	0.947022	0.946576	0.467943
FOXJ1	0.982872	0.963521	0.947018	0.946577	0.467996
HNRNPH2	0.977901	0.968366	0.946966	0.946589	0.468861
DRD1	0.980451	0.965812	0.946931	0.946591	0.469079
MAP2K2	0.979376	0.966832	0.946892	0.946598	0.469568
TRIM49	0.974958	0.971185	0.946865	0.946602	0.469893
KCNJ6	0.979242	0.966832	0.946763	0.946618	0.471195
RNF113A	0.982333	0.963775	0.946748	0.946621	0.471411
LRTM2	0.981526	0.964538	0.946719	0.946624	0.471628
TECR	0.977098	0.968877	0.946688	0.946629	0.472063
KCNJ9	0.983546	0.962505	0.946668	0.946631	0.472227
IKBKG	0.976027	0.969902	0.946651	0.946633	0.472336
FBXO9	0.976964	0.968877	0.946558	0.94664	0.472985
SYT11	0.979779	0.966067	0.946532	0.946644	0.473255
HERPUD1	0.97683	0.968877	0.946429	0.946662	0.47466
ACTA2	0.97884	0.966832	0.946374	0.946669	0.475203
SLC25A37	0.98166	0.964029	0.946349	0.946673	0.475525
DHDDS	0.975626	0.969902	0.946262	0.946681	0.476172
ALDOC	0.978437	0.967087	0.946235	0.946684	0.476443
GBX2	0.984085	0.961491	0.946189	0.946691	0.476983
MKX	0.980451	0.965047	0.946181	0.946693	0.477145
AIP	0.979376	0.966067	0.946143	0.946696	0.477471
NEK6	0.97576	0.969646	0.946142	0.946698	0.47758
HTR4	0.978035	0.967343	0.946096	0.946705	0.478121
TBC1D13	0.977232	0.96811	0.946068	0.946708	0.478392
TSC22D4	0.982603	0.962759	0.946009	0.946718	0.479151
PPP1R7	0.977633	0.967598	0.945957	0.946727	0.479912
RNF19B	0.972424	0.972728	0.945904	0.946736	0.480669
MST4	0.972424	0.972728	0.945904	0.946736	0.480669
C12orf66	0.97884	0.966322	0.945874	0.94674	0.480994
GORASP2	0.974958	0.970159	0.945864	0.946742	0.481103
TSPYL6	0.981795	0.963267	0.945731	0.946765	0.483
ELANE	0.983815	0.961237	0.94568	0.946775	0.483816
KCNAB2	0.976295	0.968621	0.94566	0.946778	0.484034
GTF2H2	0.971626	0.973243	0.945628	0.94678	0.484304
GTF2H2C	0.971626	0.973243	0.945628	0.94678	0.484304
KIR3DL3	0.979779	0.965047	0.945533	0.946789	0.485008
TMEM110-MUSTN1	0.975626	0.969133	0.945512	0.946793	0.485279
KCTD13	0.982603	0.962251	0.945511	0.946793	0.485334
ISL1	0.980451	0.964284	0.945432	0.946799	0.48582
INHBA	0.982468	0.962251	0.945381	0.946804	0.486198
TFG	0.972557	0.971956	0.945283	0.946814	0.487122
ADAP1	0.974825	0.969646	0.945235	0.94682	0.487555
GNAI2	0.981795	0.962759	0.945232	0.946821	0.487609
SAV1	0.97096	0.973501	0.945231	0.946822	0.487719
RRAGB	0.974024	0.970415	0.945208	0.946825	0.487989
FAM155B	0.980182	0.964284	0.945173	0.946829	0.48826
PRAMEF13	0.979108	0.965302	0.945135	0.946831	0.488476
FOXB1	0.986854	0.9577	0.94511	0.946835	0.488747
WDR12	0.971093	0.973243	0.94511	0.946835	0.488801
VASP	0.976161	0.96811	0.945031	0.946844	0.489559
TSSK6	0.985165	0.959214	0.944984	0.94685	0.490043
DUSP8	0.978169	0.966067	0.944977	0.946851	0.490205
MAPK10	0.974024	0.970159	0.944958	0.946855	0.490584
EIF3E	0.974024	0.970159	0.944958	0.946856	0.490584
IRF9	0.974691	0.96939	0.944856	0.946866	0.491452
XK	0.978169	0.965812	0.944727	0.94688	0.492586
LARP6	0.980451	0.963521	0.944685	0.946885	0.493021
SMAD1	0.978303	0.965557	0.944607	0.946894	0.493777
PIP4K2A	0.978035	0.965812	0.944598	0.946896	0.493941
UHMK1	0.977767	0.966067	0.944588	0.946897	0.494158
DPF3	0.980048	0.963775	0.944545	0.946904	0.494646
RHCE	0.976161	0.967598	0.944532	0.946906	0.494861
HNF4G	0.975894	0.967854	0.944523	0.946908	0.495022
ST13	0.97096	0.972728	0.94448	0.946914	0.495455
MAT1A	0.97884	0.964793	0.944377	0.946927	0.496644
LHX5	0.982199	0.961491	0.944375	0.946928	0.496699
NFKBIL1	0.974691	0.968877	0.944356	0.946931	0.496969
FLI1	0.980316	0.963267	0.944306	0.946939	0.497621
SLC16A9	0.975626	0.967854	0.944264	0.946942	0.497945
HTR2A	0.978706	0.964793	0.944248	0.946945	0.498108
WSB2	0.976295	0.967087	0.944163	0.946956	0.499137
PDK3	0.974958	0.968366	0.944116	0.946959	0.499353
ASPHD2	0.980048	0.963267	0.944047	0.946965	0.499897
ATOH1	0.985705	0.9577	0.94401	0.946971	0.500441
CYR61	0.978974	0.964284	0.944008	0.946972	0.500549
ZIC3	0.980988	0.962251	0.943957	0.94698	0.501196
TMEM200A	0.980719	0.962505	0.943947	0.946981	0.501358
S1PR4	0.983815	0.959466	0.943938	0.946983	0.501466
GPR26	0.983411	0.959719	0.943798	0.946996	0.502554
DCP2	0.971492	0.971442	0.943749	0.947002	0.503095
GNAZ	0.983815	0.959214	0.943689	0.947012	0.504021
GNA13	0.979913	0.963013	0.943669	0.947017	0.504509
SASH3	0.975226	0.967598	0.943627	0.947025	0.505162
ARPC1A	0.974424	0.968366	0.943599	0.947027	0.505431
PAQR9	0.98449	0.958456	0.943591	0.947029	0.505538
NAB1	0.973357	0.96939	0.943562	0.947033	0.505971
COMMD3-BMI1	0.969233	0.973501	0.943549	0.947036	0.506189
PRAMEF22	0.978706	0.964029	0.943501	0.947042	0.506678
FAM188A	0.971226	0.971442	0.94349	0.947043	0.506787
GIMAP1-GIMAP5	0.977633	0.965047	0.943462	0.947048	0.507165
SPOCK2	0.974691	0.967854	0.943359	0.947063	0.508574
PPARG	0.977767	0.964793	0.943343	0.947066	0.508846
FAM53C	0.978169	0.964284	0.943233	0.947076	0.509714
SIRT7	0.980988	0.961491	0.943211	0.947079	0.509986
AAMP	0.976295	0.966067	0.943166	0.947082	0.510256
SLC10A3	0.983007	0.959466	0.943162	0.947083	0.51031
NEUROD2	0.98476	0.9577	0.943104	0.947089	0.51085
C16orf70	0.970296	0.971956	0.943085	0.947092	0.511122
ATXN10	0.972557	0.969646	0.943036	0.947102	0.512045
HAT1	0.971759	0.970415	0.943009	0.947106	0.512371
CERS6	0.971226	0.970929	0.942991	0.947107	0.512479
OPRL1	0.983815	0.958456	0.942944	0.947115	0.513186
TMEM135	0.972158	0.969902	0.942898	0.947118	0.513512
ARMCX5	0.975226	0.966832	0.942879	0.947119	0.513566
PISD	0.98166	0.960478	0.942863	0.94712	0.513674
LDB1	0.977499	0.964538	0.942835	0.947122	0.514001
TMEM201	0.980048	0.961998	0.942804	0.947125	0.514271
ATP6AP1	0.976161	0.965812	0.942788	0.947127	0.514378
CHKA	0.972025	0.969902	0.942769	0.947129	0.514593
HTR1B	0.981526	0.960478	0.942734	0.947133	0.514973
TWF2	0.97683	0.965047	0.942687	0.947137	0.515299
KCNJ2	0.977767	0.964029	0.942596	0.947146	0.516111
ZBTB43	0.980585	0.961237	0.942575	0.947148	0.516382
RNF26	0.980048	0.961744	0.942555	0.94715	0.516545
PLAG1	0.976429	0.965302	0.942549	0.947151	0.516599
SLC30A3	0.979779	0.961998	0.942545	0.947152	0.516652
TUBA1A	0.978437	0.963267	0.942496	0.947156	0.517138
TUBA1B	0.978437	0.963267	0.942496	0.947157	0.517138
ENTPD1	0.97349	0.96811	0.942446	0.947161	0.517517
TIA1	0.968835	0.972728	0.942413	0.947164	0.517736
PGA3	0.976027	0.965557	0.94241	0.947164	0.517898
SGMS1	0.973357	0.96811	0.942317	0.947176	0.518872
PVRL3	0.973224	0.96811	0.942187	0.947187	0.5199
GPR6	0.98584	0.955686	0.942154	0.947193	0.520444
POU4F3	0.982468	0.958961	0.942149	0.947194	0.520552
TSPYL5	0.979108	0.962251	0.942148	0.947195	0.520605
BMP8B	0.978303	0.963013	0.942119	0.947198	0.520876
SLC35B2	0.976161	0.965047	0.942042	0.947206	0.521635
WNT9A	0.982064	0.959214	0.942009	0.947211	0.522124
ELAVL3	0.982064	0.959214	0.942009	0.947211	0.522124
FAM134A	0.974558	0.966577	0.941985	0.947213	0.522393
ZNF649	0.974291	0.966832	0.941976	0.947216	0.522608
MLST8	0.97683	0.964284	0.941941	0.947221	0.52304
ESX1	0.979779	0.961237	0.9418	0.947246	0.525373
ZNF410	0.972557	0.968366	0.941791	0.947248	0.525533
GAS2L1	0.982333	0.958709	0.941772	0.947249	0.525696
ESRRA	0.97884	0.961998	0.941642	0.947259	0.526723
STK24	0.97309	0.967598	0.941561	0.947268	0.527593
ITPKA	0.978437	0.962251	0.941503	0.947274	0.528134
ETNK1	0.973757	0.966832	0.94146	0.947278	0.528512
CKB	0.979645	0.960984	0.941423	0.947281	0.528779
TMEM151A	0.98193	0.958709	0.941384	0.947286	0.529213
PARS2	0.978571	0.961998	0.941384	0.947286	0.529268
ZC3H10	0.978035	0.962505	0.941364	0.947288	0.529485
GPR45	0.983141	0.957448	0.941307	0.947292	0.529811
RNF128	0.977633	0.962759	0.941225	0.947302	0.530732
NLGN4Y	0.971626	0.968621	0.941137	0.947309	0.531491
TUBA1C	0.978303	0.961998	0.941126	0.947311	0.531598
TPST2	0.98395	0.956441	0.94109	0.947315	0.532033
PBX3	0.974157	0.965812	0.940853	0.947338	0.534311
ZNF382	0.975092	0.964793	0.940762	0.94735	0.535391
PEX14	0.974825	0.965047	0.940752	0.947351	0.535499
SPSB3	0.981526	0.958456	0.94075	0.947353	0.535662
DCAF4L1	0.977901	0.961998	0.940739	0.947356	0.53604
COX10	0.977901	0.961998	0.940739	0.947356	0.53604
BCL3	0.977901	0.961998	0.940739	0.947357	0.53604
AGPAT4	0.974024	0.965812	0.940724	0.947359	0.536258
RNF44	0.973224	0.966577	0.940696	0.947363	0.536746
WIPI1	0.972957	0.966832	0.940686	0.947365	0.53691
LRRTM4	0.976295	0.963521	0.940681	0.947366	0.536964
DCX	0.974691	0.965047	0.940623	0.947371	0.537399
RBMXL2	0.979511	0.960225	0.94055	0.947377	0.537995
SERINC3	0.973757	0.965812	0.940466	0.947386	0.538968
TERF1	0.972691	0.966832	0.940429	0.947389	0.539236
AMIGO1	0.979376	0.960225	0.940422	0.94739	0.539398
RNF130	0.975493	0.964029	0.940404	0.947391	0.539452
MSANTD3-TMEFF1	0.971626	0.967854	0.940392	0.947392	0.539506
SLAIN2	0.973624	0.965812	0.940337	0.9474	0.540264
NDUFA9	0.972158	0.967087	0.940162	0.947417	0.541999
CYLC1	0.972158	0.967087	0.940162	0.947417	0.541999
PRAMEF19	0.976429	0.962759	0.940065	0.947425	0.542762
ABHD2	0.976161	0.963013	0.940056	0.947426	0.54287
TBX15	0.972557	0.966577	0.940052	0.947428	0.543033
ADSS	0.971759	0.967343	0.940024	0.947431	0.543359
STOML2	0.973224	0.965812	0.939951	0.947439	0.544117
ADRA2C	0.979376	0.959719	0.939926	0.947441	0.544336
GPRC5B	0.97884	0.960225	0.939906	0.947442	0.544445
PARD6A	0.980316	0.958709	0.939838	0.947446	0.544875
CREB3L2	0.97309	0.965812	0.939822	0.947447	0.545037
STK38	0.971492	0.967343	0.939766	0.947458	0.546067
SHB	0.974825	0.964029	0.93976	0.947458	0.54612
CKAP4	0.977633	0.961237	0.939738	0.947462	0.546501
RBMS3	0.969366	0.96939	0.939693	0.947465	0.546881
GPR61	0.977499	0.961237	0.939609	0.947476	0.547965
HS6ST3	0.979645	0.958961	0.939441	0.947496	0.549861
GATM	0.97003	0.968366	0.939344	0.947508	0.551104
LRRC24	0.977098	0.961237	0.939223	0.94752	0.552351
ZNF248	0.972691	0.965557	0.939188	0.947522	0.552566
AMIGO2	0.979376	0.958961	0.939184	0.947523	0.55262
IRX2	0.981391	0.956944	0.939137	0.947527	0.552998
RTN4RL1	0.983681	0.954682	0.939102	0.947532	0.553539
JMJD6	0.975894	0.962251	0.939055	0.947535	0.55381
SLC16A1	0.972291	0.965812	0.93905	0.947535	0.553916
ZNF195	0.971492	0.966577	0.939022	0.947536	0.554079
HBP1	0.97096	0.967087	0.939004	0.947538	0.554242
KCNA2	0.974291	0.963775	0.938997	0.947539	0.554296
C7orf26	0.979108	0.958961	0.938927	0.947544	0.554837
PLA2G15	0.977767	0.960225	0.938877	0.94755	0.555376
ZNF331	0.975359	0.962505	0.938788	0.94756	0.556452
GPR89A	0.968172	0.969646	0.938784	0.947561	0.556507
GOT2	0.974958	0.962759	0.93865	0.947569	0.557317
ETS1	0.974157	0.963521	0.938621	0.947571	0.557589
MTA3	0.973624	0.964029	0.938602	0.947574	0.557859
FAM126A	0.97003	0.967598	0.938599	0.947574	0.557913
PLAGL2	0.980719	0.956944	0.938493	0.947585	0.558991
ARRB2	0.974024	0.963521	0.938492	0.947585	0.559045
WNT5B	0.980182	0.957448	0.938473	0.947588	0.55926
EDC3	0.976295	0.961237	0.938451	0.947593	0.559802
ALDH1A2	0.971892	0.965557	0.938417	0.947595	0.560073
EGR3	0.98476	0.952927	0.938404	0.947596	0.560126
TOX2	0.977767	0.959719	0.938382	0.947599	0.560451
MAP3K8	0.973624	0.963775	0.938354	0.947602	0.560777
PCOLCE	0.975626	0.961744	0.938303	0.947605	0.561153
TNFRSF1B	0.976027	0.961237	0.938194	0.947613	0.561964
ZNF449	0.970827	0.966322	0.938132	0.94762	0.562668
TAF7L	0.970694	0.966322	0.938003	0.94763	0.563753
ALKBH5	0.980719	0.956441	0.938	0.947631	0.563807
LUC7L2	0.969632	0.967343	0.937966	0.947633	0.564022
PSMC4	0.975894	0.960984	0.937818	0.947648	0.565705
MBOAT2	0.967377	0.969133	0.937517	0.947677	0.568729
CCDC36	0.970694	0.965812	0.937508	0.947679	0.568892
MAB21L2	0.979645	0.956944	0.937465	0.947681	0.56911
GATA3	0.978035	0.958456	0.937404	0.947686	0.569649
ZBTB12	0.982333	0.95418	0.937323	0.947693	0.57052
KRT18	0.977366	0.958961	0.937256	0.947702	0.571494
POLDIP3	0.971626	0.964538	0.93717	0.94771	0.572301
PTGER3	0.981122	0.955184	0.937152	0.94771	0.572356
PAX1	0.980854	0.955435	0.937142	0.947712	0.572519
FAM153B	0.96698	0.969133	0.937132	0.947714	0.572736
E2F3	0.973624	0.962505	0.937118	0.947717	0.573115
UBAC1	0.975626	0.960478	0.937068	0.947723	0.573766
SLC2A3	0.974825	0.961237	0.937038	0.947726	0.574144
CAP1	0.969897	0.966067	0.936985	0.947734	0.575013
TUBB	0.977499	0.958456	0.936891	0.947742	0.575823
PPP2R5A	0.968702	0.967087	0.93682	0.947748	0.576525
PPM1H	0.976295	0.959466	0.936722	0.947753	0.577121
WNT3A	0.981122	0.954682	0.93666	0.947762	0.578039
PTPN1	0.968702	0.966832	0.936573	0.947769	0.578851
SOX8	0.981257	0.954431	0.936542	0.94777	0.579015
NFS1	0.971626	0.963775	0.936428	0.947775	0.579501
CYP21A2	0.974157	0.961237	0.936397	0.947779	0.579936
PICK1	0.976429	0.958961	0.936357	0.947781	0.580206
SPRED1	0.968437	0.966832	0.936316	0.947783	0.580423
KIAA1045	0.974291	0.960984	0.936278	0.947787	0.580908
EGR2	0.980451	0.954933	0.936264	0.947788	0.580962
SSTR1	0.983546	0.951926	0.936263	0.947789	0.581071
ATF2	0.969101	0.966067	0.936216	0.947791	0.581231
KIAA0930	0.977499	0.9577	0.936151	0.947797	0.581882
GPR89B	0.966715	0.96811	0.935886	0.947815	0.58394
CEACAM1	0.971759	0.963013	0.935816	0.94782	0.584425
MSANTD2	0.97349	0.961237	0.935755	0.947823	0.584751
CYP46A1	0.973224	0.961491	0.935746	0.947825	0.584964
B3GAT1	0.980854	0.953929	0.935665	0.947831	0.585667
NFE2L2	0.972025	0.962505	0.935579	0.947835	0.586098
RCOR3	0.971759	0.962759	0.935569	0.947836	0.586206
KPNA2	0.971226	0.963267	0.93555	0.947838	0.586367
SLC38A9	0.970694	0.963775	0.935531	0.947839	0.586531
DYNC1LI2	0.971892	0.962505	0.935451	0.947845	0.58718
NUP62	0.980719	0.953678	0.935291	0.947858	0.58864
CNP	0.97683	0.957448	0.935264	0.947859	0.588803
NCK2	0.98193	0.952426	0.935215	0.947864	0.589343
SMAD3	0.974691	0.959466	0.935184	0.94787	0.59005
SUV420H2	0.974691	0.959466	0.935184	0.94787	0.59005
KCNS2	0.979511	0.954682	0.935121	0.947873	0.590373
PKMYT1	0.974291	0.959719	0.935046	0.947878	0.590861
NR1H2	0.97576	0.958204	0.934977	0.947881	0.591295
CBX6	0.983141	0.950927	0.934895	0.947888	0.591996
TOX	0.972291	0.961491	0.934849	0.94789	0.592213
CEP57	0.964599	0.969133	0.934826	0.947892	0.592429
SS18L1	0.971492	0.962251	0.93482	0.947893	0.592536
KPNA3	0.966715	0.966832	0.934651	0.947904	0.593832
PBX2	0.972824	0.960731	0.934622	0.947907	0.594157
CYTH2	0.972557	0.960984	0.934612	0.947908	0.594265
SHE	0.971492	0.961998	0.934574	0.947911	0.594696
SNPH	0.978303	0.955184	0.934459	0.947926	0.596264
ZNF358	0.979779	0.953678	0.934394	0.947931	0.596912
ABI1	0.968172	0.965047	0.934332	0.947936	0.5974
LMX1B	0.974558	0.958709	0.934317	0.947939	0.597832
DDX39A	0.97683	0.956189	0.934034	0.947965	0.600799
MEX3A	0.979645	0.953428	0.93402	0.947966	0.600853
TPH2	0.968039	0.964793	0.933957	0.947972	0.601614
FAR1	0.968702	0.964029	0.933858	0.947978	0.602318
RUNX3	0.977633	0.955184	0.933819	0.947982	0.602749
RIPK2	0.96857	0.963775	0.933483	0.948004	0.605291
TRIM11	0.978035	0.954431	0.933467	0.948006	0.605451
DRD2	0.976696	0.955686	0.933415	0.948008	0.605776
NR1H3	0.975092	0.957196	0.933354	0.948014	0.606368
LRRC47	0.974558	0.9577	0.933334	0.948017	0.606802
ST3GAL3	0.971359	0.960731	0.933215	0.948025	0.60767
FAM196A	0.976964	0.955184	0.93318	0.948028	0.608047
ZBTB34	0.975894	0.956189	0.933139	0.94803	0.608318
GK5	0.965657	0.966322	0.933135	0.948031	0.608426
IQCJ-SCHIP1	0.967377	0.964538	0.933072	0.948036	0.609126
THOC1	0.970429	0.961491	0.933058	0.948037	0.60918
APEX2	0.976295	0.955686	0.933032	0.948039	0.609397
MGAT1	0.980048	0.951926	0.932933	0.948046	0.61021
SLC22A17	0.969764	0.961998	0.932911	0.948048	0.610536
CDC14B	0.969897	0.961744	0.932793	0.948056	0.611456
CYTH4	0.972158	0.959466	0.932753	0.948059	0.611781
GPR107	0.964996	0.966577	0.932743	0.94806	0.611836
CCDC120	0.974424	0.957196	0.932715	0.948064	0.612322
SCG2	0.970827	0.960731	0.932704	0.948065	0.61243
FAM155A	0.973624	0.957952	0.932685	0.948066	0.612592
MUM1L1	0.969233	0.962251	0.932646	0.948068	0.612809
SOCS6	0.978706	0.952927	0.932635	0.94807	0.613023
KCNK5	0.976562	0.954933	0.932551	0.948073	0.613509
FOXO4	0.97576	0.955686	0.93252	0.948078	0.613989
NOP58	0.965921	0.965302	0.932405	0.948084	0.6148
HOXB3	0.98166	0.949679	0.932263	0.948097	0.616253
CLEC18C	0.972291	0.958709	0.932144	0.948104	0.617227
GALNT13	0.968172	0.962759	0.932116	0.948106	0.617388
LANCL2	0.971226	0.959719	0.932105	0.948107	0.617497
NR1D2	0.970163	0.960731	0.932066	0.948109	0.617766
MSL2	0.972957	0.957952	0.932046	0.948109	0.617821
NXN	0.973891	0.956944	0.931959	0.948117	0.618684
MAEA	0.976161	0.954682	0.931923	0.948119	0.618901
PPP2R2C	0.975894	0.954933	0.931913	0.948119	0.618955
PTDSS1	0.966318	0.964284	0.931805	0.948126	0.619765
RBM42	0.97576	0.954933	0.931785	0.948127	0.619927
C1orf106	0.974424	0.956189	0.931734	0.948132	0.620466
RPN1	0.970827	0.959719	0.931722	0.948133	0.620629
TUFM	0.973891	0.956692	0.931714	0.948134	0.620737
GPR123	0.975359	0.955184	0.931647	0.948139	0.621279
OSBPL2	0.971492	0.958961	0.931624	0.948141	0.62155
PUF60	0.977366	0.953177	0.931603	0.948143	0.621767
FRS3	0.974024	0.956441	0.931596	0.948143	0.621821
ESRRB	0.973357	0.956944	0.931448	0.948153	0.623066
BIRC3	0.969764	0.960478	0.931437	0.948154	0.62312
SPTLC2	0.968968	0.961237	0.931408	0.948157	0.623553
PDE1A	0.967112	0.963013	0.931341	0.948161	0.623984
COL8A2	0.974291	0.955686	0.931116	0.948174	0.62555
DACH2	0.972691	0.957196	0.931056	0.948179	0.626251
TRIP6	0.972424	0.957448	0.931046	0.94818	0.626357
FEM1C	0.971626	0.958204	0.931016	0.948184	0.626791
ATE1	0.964203	0.965557	0.930993	0.948187	0.627222
SYN1	0.969233	0.960478	0.930927	0.948193	0.627872
ARMCX2	0.977098	0.952676	0.930858	0.948197	0.628359
P4HA1	0.967112	0.962505	0.93085	0.948197	0.628412
AMY1C	0.964996	0.964538	0.930775	0.948202	0.629064
RTN4R	0.980854	0.948932	0.930764	0.948203	0.629119
UBQLN2	0.974424	0.955184	0.930754	0.948203	0.629173
ZNF182	0.967774	0.961744	0.930751	0.948204	0.629228
SNX17	0.970296	0.958961	0.930476	0.948221	0.631343
TRAF4	0.973224	0.955938	0.930341	0.948232	0.632696
MYNN	0.968702	0.960225	0.930172	0.94824	0.633834
IL21R	0.971759	0.957196	0.930163	0.948241	0.633887
CHRNB2	0.976964	0.951926	0.929997	0.948251	0.635082
ZNF460	0.97309	0.955686	0.929969	0.948252	0.635244
GALNT1	0.965128	0.963521	0.929921	0.948259	0.636056
IL1RAP	0.970163	0.958456	0.929859	0.948264	0.636707
RAP1GDS1	0.964203	0.964284	0.929766	0.94827	0.637517
RNF25	0.965921	0.962505	0.929704	0.948275	0.638112
LMOD1	0.975092	0.953428	0.92968	0.948277	0.638273
LINGO2	0.97349	0.954933	0.929618	0.948279	0.638599
NEURL	0.975493	0.952927	0.929573	0.948281	0.638816
FAM98A	0.966053	0.961998	0.929341	0.9483	0.641192
PLXDC2	0.964335	0.963521	0.929157	0.948311	0.642599
ENC1	0.972291	0.955435	0.928961	0.948317	0.643516
ZNF304	0.972291	0.955435	0.928961	0.948318	0.643516
SLC41A1	0.971226	0.956441	0.92892	0.94832	0.643786
NR0B1	0.979376	0.948434	0.928874	0.948325	0.644383
HDGFRP2	0.966053	0.961491	0.928851	0.948327	0.6446
CLINT1	0.968835	0.958709	0.928831	0.948328	0.644763
HSF1	0.973224	0.95418	0.92863	0.948341	0.646328
POTED	0.966583	0.960731	0.928626	0.948341	0.646437
TOX4	0.96698	0.960225	0.928518	0.948348	0.647245
DCAF12L1	0.979511	0.947937	0.928514	0.948348	0.647299
ZBTB33	0.971226	0.955686	0.928188	0.948365	0.649464
RGS7	0.963807	0.963013	0.928159	0.948366	0.649572
SLC35F3	0.973224	0.953678	0.928142	0.948367	0.649681
TCF7L1	0.970562	0.956189	0.92804	0.948372	0.650332
LRRC1	0.964335	0.962251	0.927933	0.948377	0.650925
RAPGEFL1	0.969764	0.956692	0.927766	0.948389	0.652435
KCNJ4	0.982199	0.944465	0.927652	0.948397	0.653406
CPNE4	0.966583	0.959719	0.927648	0.948398	0.653568
VANGL1	0.972424	0.953929	0.927624	0.948399	0.653677
CSRNP1	0.974424	0.951926	0.92758	0.948404	0.654327
NOL10	0.965789	0.960225	0.927374	0.948417	0.656107
APBB1IP	0.96526	0.960731	0.927355	0.948419	0.656269
RGS6	0.963412	0.962505	0.927289	0.948422	0.6567
CCDC64	0.962225	0.963521	0.927124	0.948433	0.658103
CDYL2	0.970827	0.954933	0.927075	0.948435	0.658373
AJUBA	0.968172	0.957448	0.926974	0.948439	0.658914
ABHD8	0.976562	0.949181	0.926935	0.948442	0.659346
PVRL2	0.968835	0.956441	0.926633	0.94846	0.661717
TRIM27	0.971892	0.953428	0.926628	0.948461	0.661826
BMP6	0.971359	0.953929	0.926608	0.948463	0.662042
ZKSCAN1	0.969632	0.955435	0.92642	0.948474	0.663554
SNTB1	0.971093	0.953929	0.926354	0.948478	0.664094
IGSF21	0.974157	0.950927	0.926352	0.948479	0.664148
TNFRSF11A	0.970827	0.95418	0.926344	0.94848	0.664257
CANX	0.963016	0.961744	0.926175	0.948492	0.665824
ZNF770	0.965789	0.958961	0.926154	0.948493	0.666041
CD19	0.968835	0.955938	0.926146	0.948494	0.666148
EGR1	0.978035	0.946943	0.926144	0.948495	0.66631
LRRN3	0.967907	0.956692	0.925989	0.948502	0.667174
ZNF395	0.968305	0.956189	0.925882	0.948507	0.667932
ZNF12	0.967774	0.956692	0.925862	0.948507	0.668095
CDKAL1	0.963412	0.960984	0.925823	0.94851	0.668421
LRRTM3	0.969233	0.955184	0.925796	0.948512	0.668639
SLC17A6	0.968172	0.956189	0.925756	0.948513	0.668802
EOMES	0.96526	0.958961	0.925647	0.94852	0.669716
ELF1	0.964996	0.959214	0.925637	0.948521	0.669934
PAK1	0.963676	0.960478	0.925589	0.948524	0.670205
FNBP1	0.97003	0.95418	0.925583	0.948525	0.670314
HSF5	0.972291	0.951926	0.925549	0.948527	0.670584
CORO2B	0.971759	0.952426	0.925528	0.948528	0.670801
ATF7IP2	0.965657	0.958204	0.925296	0.948542	0.672631
PHACTR1	0.971492	0.952426	0.925275	0.948545	0.672958
AP1M1	0.970429	0.953428	0.925233	0.948548	0.673497
SPATA2	0.975493	0.948186	0.924948	0.948564	0.675546
ZBTB7B	0.974691	0.948932	0.924916	0.948567	0.675869
PIK3R5	0.971626	0.951926	0.924916	0.948567	0.675923
DDX53	0.967642	0.955686	0.924762	0.948576	0.677168
BMPR1A	0.96526	0.957952	0.924673	0.948582	0.677926
FEM1B	0.972557	0.950677	0.924588	0.948586	0.678463
CHAF1B	0.968968	0.95418	0.924569	0.948588	0.67868
POT1	0.962884	0.959972	0.924342	0.948598	0.680028
HLX	0.975493	0.947192	0.923979	0.948612	0.682083
CHST1	0.978035	0.944713	0.923962	0.948613	0.682137
ZSCAN18	0.974024	0.948434	0.923798	0.948619	0.682999
ZXDB	0.972158	0.950178	0.923723	0.948624	0.683589
PTGER4	0.974958	0.94744	0.923715	0.948624	0.683642
MAPK6	0.96645	0.955686	0.923623	0.948627	0.684021
RCC2	0.964599	0.957448	0.923554	0.948631	0.684508
CD2AP	0.959726	0.962251	0.923498	0.948632	0.684723
KIAA1598	0.958283	0.963521	0.923325	0.948637	0.68537
NUMBL	0.967642	0.95418	0.923304	0.948639	0.685587
TIMM44	0.967377	0.954431	0.923294	0.948639	0.685641
ZCCHC8	0.966583	0.955184	0.923264	0.948641	0.685964
NFIC	0.975493	0.946447	0.923252	0.948642	0.686019
DET1	0.971759	0.949929	0.923101	0.948648	0.68683
KLC1	0.96645	0.954933	0.922895	0.948657	0.688184
CPNE2	0.965921	0.955435	0.922875	0.948659	0.6884
KLHL32	0.966583	0.954682	0.922778	0.948665	0.689261
FSD1	0.972025	0.949181	0.922628	0.948674	0.69039
EIF2B4	0.964071	0.956944	0.922562	0.948678	0.690931
ZBTB10	0.960909	0.959972	0.922446	0.948683	0.691738
WRNIP1	0.96645	0.954431	0.92241	0.948685	0.692009
SACM1L	0.958807	0.961998	0.92237	0.948688	0.692387
SYN3	0.967377	0.953428	0.922324	0.948689	0.692549
ZBTB5	0.971892	0.948932	0.922259	0.948692	0.692873
CSRNP3	0.964996	0.955686	0.922233	0.948692	0.69298
TRIM67	0.97003	0.950677	0.922185	0.948694	0.693196
ARFGAP2	0.964864	0.955686	0.922107	0.948697	0.693627
PAF1	0.96526	0.955184	0.922001	0.948701	0.694168
TMEM87A	0.958414	0.961998	0.921992	0.948702	0.694275
LRFN5	0.968835	0.951426	0.921775	0.948711	0.695571
ELF4	0.96857	0.951426	0.921523	0.948719	0.696591
PAX7	0.971759	0.948186	0.921408	0.948725	0.697396
SCMH1	0.967112	0.952676	0.921345	0.948728	0.697937
TNFRSF21	0.972424	0.94744	0.921314	0.948729	0.698046
GGA3	0.968039	0.951676	0.92126	0.948732	0.698476
SLC5A3	0.969632	0.949929	0.921081	0.948741	0.69977
UBC	0.97309	0.946199	0.920737	0.948757	0.701873
FYB	0.966053	0.952927	0.920578	0.948764	0.702901
ZIC1	0.978437	0.940764	0.920479	0.94877	0.703705
BAG3	0.969499	0.94943	0.920471	0.948771	0.703811
TRIM26	0.967112	0.951676	0.920377	0.948776	0.704454
ZNF768	0.974157	0.944713	0.920299	0.94878	0.704995
RNF145	0.963016	0.955435	0.920099	0.94879	0.706509
HDX	0.961436	0.956944	0.92004	0.948792	0.706776
LPP	0.965657	0.952676	0.919958	0.948794	0.706938
SLC7A5	0.974157	0.944218	0.919817	0.948798	0.707585
RNF103	0.962489	0.955435	0.919596	0.948808	0.708995
CLPX	0.959595	0.958204	0.919488	0.948815	0.70986
CHFR	0.966318	0.951426	0.91938	0.948818	0.710345
PEX5L	0.961699	0.955938	0.919324	0.94882	0.710613
NCLN	0.97003	0.947688	0.919286	0.948822	0.710884
VCAM1	0.964599	0.952927	0.919193	0.948825	0.711316
LRRN1	0.969101	0.948434	0.919128	0.948829	0.711797
TSPYL2	0.968039	0.94943	0.919086	0.948831	0.712119
ZNF585A	0.963412	0.953929	0.919026	0.948835	0.712658
PVRL1	0.972291	0.945208	0.919017	0.948835	0.712711
KLHL13	0.964335	0.952927	0.918941	0.948837	0.713037
NCAPH2	0.962752	0.954431	0.91888	0.948841	0.713579
SMOX	0.971626	0.945703	0.918869	0.948842	0.713688
MTDH	0.964335	0.952676	0.9187	0.948849	0.714654
GAD1	0.964732	0.952176	0.918594	0.948854	0.715408
PPP2R1A	0.966715	0.950178	0.918551	0.948856	0.715627
SPDYE3	0.96526	0.951426	0.918374	0.948863	0.716599
KDM1B	0.960515	0.955938	0.918192	0.948867	0.717303
FGFRL1	0.974825	0.941749	0.91804	0.948873	0.718
AKAP8L	0.969101	0.947192	0.917924	0.948878	0.71875
DDX18	0.961962	0.95418	0.917885	0.94888	0.719021
LZTS1	0.974291	0.941749	0.917538	0.948892	0.72075
RNGTT	0.959989	0.955686	0.917448	0.948895	0.721129
GAD2	0.963016	0.952426	0.917202	0.948904	0.72237
BMX	0.95907	0.956189	0.917052	0.948907	0.722908
NHSL2	0.959989	0.955184	0.916966	0.948912	0.723497
SNX9	0.958414	0.956692	0.916907	0.948914	0.723821
DENND1B	0.959332	0.955686	0.916821	0.948916	0.724092
TULP1	0.965789	0.949181	0.916708	0.94892	0.724685
PTH1R	0.967244	0.947688	0.916646	0.948923	0.725118
HSPA5	0.968968	0.945951	0.916596	0.948925	0.725383
PAK4	0.968172	0.946695	0.916564	0.948926	0.725491
PRDM5	0.960252	0.954431	0.916494	0.948928	0.725761
GCLC	0.959332	0.955184	0.916339	0.948938	0.72716
LONRF2	0.963676	0.950677	0.916144	0.948946	0.7284
ERF	0.971626	0.942736	0.915986	0.948953	0.729317
SLC20A1	0.962489	0.951676	0.915978	0.948954	0.72948
GOLGA8A	0.963412	0.950677	0.915893	0.948958	0.730019
FUBP3	0.961041	0.952676	0.915561	0.948968	0.73158
MPHOSPH10	0.957758	0.955938	0.915557	0.948969	0.731744
EHD1	0.974958	0.939044	0.915529	0.94897	0.73185
SLC7A1	0.970163	0.943476	0.915326	0.948978	0.732984
LRRC4	0.970562	0.942982	0.915222	0.948981	0.733415
CXorf23	0.958151	0.955184	0.915211	0.948982	0.733523
DTX4	0.971492	0.941996	0.915142	0.948985	0.733951
FLRT2	0.969897	0.943476	0.915075	0.948988	0.73433
UVRAG	0.960252	0.952927	0.91505	0.948989	0.734491
LPCAT1	0.965524	0.947688	0.915016	0.948992	0.734973
KCNC1	0.978571	0.934883	0.91485	0.948995	0.735403
NTNG2	0.971359	0.941749	0.914777	0.948999	0.735892
RALBP1	0.961699	0.951176	0.914745	0.949001	0.736325
ASIC4	0.967244	0.945703	0.914726	0.949002	0.736378
PJA1	0.964599	0.948186	0.914619	0.949005	0.736915
SCYL3	0.959332	0.952927	0.914173	0.94902	0.73907
EHD2	0.976027	0.936593	0.914141	0.949021	0.739232
RNF214	0.961041	0.950927	0.913879	0.949031	0.74053
ZNF287	0.959726	0.952176	0.913828	0.949034	0.741014
WRAP53	0.961962	0.949929	0.913795	0.949036	0.741282
KLHL4	0.961304	0.950427	0.91365	0.949041	0.742084
LRRC8B	0.964203	0.94744	0.913525	0.949045	0.742676
ABLIM2	0.965392	0.946199	0.913453	0.949049	0.743216
TNFRSF8	0.96328	0.948186	0.913368	0.949052	0.743645
REC8	0.96183	0.94943	0.913191	0.94906	0.744781
GPR37	0.970163	0.941256	0.913172	0.949061	0.744944
BTRC	0.953182	0.957952	0.913103	0.949064	0.745374
SLC5A6	0.962489	0.948683	0.913097	0.949065	0.745533
MAN1A1	0.962225	0.948932	0.913087	0.949066	0.745748
C1S	0.959989	0.950927	0.912879	0.949072	0.746606
GALNT2	0.959464	0.951426	0.912859	0.949072	0.746713
MPP5	0.959464	0.951426	0.912859	0.949073	0.746713
PWWP2B	0.976696	0.934639	0.912859	0.949073	0.746767
TBRG4	0.961962	0.948932	0.912837	0.949075	0.746983
SV2B	0.960515	0.950178	0.91266	0.949081	0.7479
TBC1D3F	0.96328	0.94744	0.91265	0.949082	0.748009
VPS33A	0.961172	0.94943	0.912566	0.949085	0.748439
FIGN	0.96645	0.944218	0.912539	0.949086	0.748599
SLC6A4	0.962489	0.947937	0.912379	0.949094	0.74978
HDC	0.960909	0.948683	0.911598	0.949118	0.753222
LAS1L	0.958807	0.950677	0.911516	0.949122	0.75376
RACGAP1	0.955271	0.95418	0.9115	0.949122	0.753814
GGT1	0.968305	0.941256	0.911423	0.949124	0.754192
ARMCX5-GPRASP2	0.961699	0.947688	0.911391	0.949126	0.754407
FSCN1	0.977901	0.931961	0.911366	0.949127	0.754622
SLC23A2	0.963016	0.946199	0.911205	0.949133	0.755429
G2E3	0.951619	0.957448	0.911125	0.949136	0.755911
GTPBP2	0.961962	0.946943	0.910924	0.949142	0.756668
PDZD7	0.957627	0.951176	0.910872	0.949142	0.756775
PRDM4	0.962884	0.945951	0.910841	0.949144	0.7571
TBC1D3B	0.962357	0.946447	0.91082	0.949146	0.757367
DNER	0.960646	0.947937	0.910632	0.949154	0.758553
DGKB	0.96012	0.948434	0.910611	0.949156	0.758824
SLC25A12	0.957758	0.950677	0.910519	0.949159	0.759313
OSBPL11	0.958151	0.950178	0.910414	0.94916	0.759475
CDC25B	0.964335	0.94397	0.910304	0.949163	0.759801
RTN2	0.961172	0.946695	0.909937	0.949171	0.761098
PASD1	0.956056	0.951676	0.909855	0.949174	0.761585
CTCFL	0.962225	0.945455	0.909741	0.94918	0.762389
BEGAIN	0.971759	0.936104	0.909667	0.949183	0.762818
TAF6L	0.966583	0.94101	0.909564	0.949187	0.763517
MAG	0.966583	0.940764	0.909326	0.949194	0.764434
NXF2B	0.955402	0.951676	0.909233	0.949198	0.765134
ADD1	0.960909	0.946199	0.909211	0.949199	0.765297
GAB1	0.956841	0.950178	0.909169	0.949201	0.765512
PDE4B	0.958807	0.948186	0.909127	0.949203	0.765943
SIX4	0.967112	0.940026	0.909111	0.949204	0.76605
ZNF503	0.974958	0.932204	0.90886	0.949209	0.766851
FIP1L1	0.953443	0.953177	0.9088	0.949211	0.767123
VGF	0.972824	0.934151	0.908765	0.949212	0.767231
PES1	0.960909	0.945703	0.908735	0.949213	0.767391
NLGN1	0.961041	0.945455	0.908621	0.949216	0.767824
FOXP4	0.964335	0.941996	0.9084	0.949221	0.76869
MID1	0.963939	0.942242	0.908264	0.949224	0.769121
SLITRK4	0.959858	0.946199	0.908216	0.949226	0.76939
KLHL22	0.96645	0.939535	0.908014	0.949231	0.770198
SLC5A5	0.965657	0.940272	0.90798	0.949232	0.77036
PLAA	0.95671	0.948683	0.907615	0.949241	0.771705
ZHX1	0.961436	0.94397	0.907567	0.949242	0.771921
ACSL3	0.955402	0.949679	0.907325	0.949249	0.772995
CAMKK2	0.963148	0.941996	0.907281	0.949252	0.773319
ADRBK2	0.954618	0.949929	0.906819	0.949262	0.774878
MAMLD1	0.958938	0.945455	0.906633	0.949266	0.775518
TFRC	0.957889	0.946447	0.906591	0.949267	0.775679
WDR70	0.95514	0.948932	0.906363	0.949277	0.777079
SLC20A2	0.964599	0.939535	0.906275	0.949278	0.777293
FZD5	0.974691	0.929778	0.906246	0.949279	0.777455
ARAF	0.960909	0.942982	0.90612	0.949284	0.778261
KCNN3	0.964335	0.939535	0.906027	0.949286	0.778583
ADARB1	0.967774	0.936104	0.905938	0.949289	0.778957
PRRT3	0.961699	0.941996	0.905916	0.94929	0.779225
MGAT4B	0.963148	0.940518	0.905858	0.949293	0.779605
TBC1D25	0.962752	0.940518	0.905486	0.949302	0.780901
SMPD3	0.966186	0.937083	0.905396	0.949304	0.781222
VRTN	0.969897	0.933421	0.905322	0.949306	0.781542
RPS6KA6	0.951228	0.951676	0.905261	0.949308	0.781815
MMP2	0.962621	0.940026	0.904889	0.949316	0.783
ZNF750	0.964864	0.937817	0.904866	0.949318	0.783267
ZBTB48	0.962225	0.940272	0.904754	0.949322	0.783972
MYB	0.954879	0.947192	0.904453	0.949328	0.784827
MLH1	0.954618	0.94744	0.904443	0.949329	0.784881
SLCO3A1	0.966318	0.93586	0.904338	0.949331	0.785259
ATXN7L2	0.966053	0.936104	0.904327	0.949332	0.785313
FLRT1	0.974825	0.92736	0.904013	0.949338	0.786278
CD248	0.969366	0.932447	0.903883	0.949342	0.786817
TICAM1	0.964732	0.936838	0.903797	0.949343	0.787088
WDR75	0.950318	0.950927	0.903682	0.949347	0.787679
FBXO46	0.970562	0.93099	0.903583	0.949351	0.788218
DAXX	0.962357	0.938798	0.903459	0.949354	0.788649
LRFN3	0.977633	0.923989	0.903322	0.949358	0.789349
RFWD3	0.953182	0.947688	0.90332	0.949359	0.789402
BOP1	0.964071	0.936838	0.903179	0.949363	0.790048
EXOC3	0.97003	0.93099	0.903088	0.949365	0.790372
SMEK2	0.953182	0.94744	0.903083	0.949366	0.790478
PDCD6IP	0.950708	0.94943	0.902631	0.949379	0.792414
JPH1	0.970296	0.930262	0.90263	0.949379	0.792468
TRPC1	0.954357	0.945703	0.902538	0.949381	0.792684
FZD7	0.975493	0.925191	0.902517	0.949382	0.792791
NSF	0.949538	0.950427	0.902467	0.949383	0.79295
BRF1	0.960778	0.939289	0.902448	0.949384	0.793221
GARS	0.9524	0.94744	0.902342	0.949388	0.79376
EXOC6B	0.955533	0.944218	0.902231	0.949391	0.79424
KCND3	0.969897	0.929536	0.901554	0.949411	0.797188
PIGR	0.960778	0.938062	0.90127	0.949417	0.798097
RPS6KA1	0.960515	0.938308	0.901258	0.949417	0.79815
TMTC2	0.956317	0.941996	0.900847	0.949427	0.799601
ANKRD20A1	0.953313	0.94496	0.900842	0.949427	0.799655
TSGA10	0.94565	0.952176	0.900425	0.949435	0.800889
LZTS2	0.959858	0.937817	0.900171	0.94944	0.801588
PLEKHM3	0.953834	0.943723	0.900156	0.949441	0.801747
APLP1	0.95802	0.939535	0.900093	0.949442	0.801962
SEMA4A	0.957889	0.939535	0.89997	0.949445	0.802394
ZNF366	0.965921	0.931718	0.899966	0.949446	0.802446
SATB1	0.952791	0.944218	0.899642	0.949453	0.803629
TRIM2	0.95802	0.938308	0.898918	0.949473	0.806523
MMP15	0.96183	0.934395	0.89873	0.949479	0.807377
RSBN1L	0.957496	0.938553	0.898661	0.949481	0.807751
APLP2	0.956448	0.939535	0.898616	0.949483	0.808076
DACT1	0.964864	0.931233	0.898512	0.949486	0.808503
CDH7	0.954487	0.941256	0.898417	0.949487	0.80888
FOXM1	0.957234	0.938553	0.898415	0.949488	0.809039
KSR1	0.968702	0.92736	0.898336	0.949491	0.809416
AKAP17A	0.969366	0.926636	0.89825	0.949495	0.810002
ZBTB46	0.964732	0.93099	0.898155	0.949499	0.810588
MAP7D2	0.949408	0.945951	0.898094	0.9495	0.810804
TAF4B	0.951358	0.943723	0.897819	0.949508	0.811928
MTSS1L	0.962357	0.932934	0.897816	0.949508	0.811981
PCDH20	0.959595	0.935616	0.897812	0.949509	0.812034
PDE8A	0.94824	0.946695	0.897694	0.949512	0.812572
SEL1L	0.949538	0.945208	0.897511	0.949516	0.813108
TSC22D2	0.965392	0.929294	0.897133	0.949524	0.814286
BRD3	0.964599	0.93002	0.897097	0.949524	0.814341
STON2	0.961304	0.932934	0.896833	0.949531	0.815359
PROSER1	0.955794	0.938308	0.896829	0.949531	0.815414
BRSK2	0.962752	0.931475	0.89678	0.949533	0.815682
ZBTB41	0.951098	0.942736	0.896634	0.949536	0.81611
HSP90AA1	0.954226	0.939535	0.896529	0.949539	0.816486
IKBKE	0.953313	0.940272	0.896373	0.949544	0.817343
HCN2	0.964467	0.929051	0.89604	0.94955	0.818308
TLR7	0.956187	0.937083	0.896026	0.94955	0.818362
ZNF473	0.958938	0.934151	0.895794	0.949555	0.819003
VAC14	0.959201	0.933664	0.895572	0.949559	0.819594
CDK11B	0.964071	0.928326	0.894973	0.949571	0.821407
RNF10	0.954879	0.937083	0.894801	0.949576	0.822107
ADAM9	0.947592	0.944218	0.894733	0.949576	0.822214
BNC1	0.958414	0.933421	0.894603	0.94958	0.822807
BACH2	0.962621	0.929294	0.894557	0.949582	0.823022
FAM91A1	0.946556	0.944713	0.894223	0.949591	0.824417
LRFN1	0.971359	0.920157	0.893803	0.949599	0.825595
MGEA5	0.949408	0.94101	0.893403	0.949606	0.826672
TTC13	0.943454	0.946695	0.893163	0.949612	0.827477
RPH3A	0.949408	0.940026	0.892469	0.949625	0.829405
SPATA13	0.947721	0.941503	0.892282	0.949628	0.82978
NEDD9	0.954879	0.934395	0.892234	0.949628	0.829887
ESRP2	0.957496	0.931718	0.892116	0.949632	0.83037
FBLN1	0.956448	0.93269	0.89207	0.949633	0.830639
PIP5K1C	0.962094	0.927119	0.891975	0.949635	0.830904
ADARB2	0.964864	0.923749	0.891292	0.949652	0.833375
SV2A	0.952921	0.935127	0.891103	0.949656	0.833913
FAM47A	0.965392	0.923029	0.891085	0.949656	0.833966
GPRIN1	0.961436	0.926636	0.890901	0.949663	0.834986
NLGN3	0.960383	0.927601	0.890853	0.949665	0.835254
MLXIPL	0.959595	0.928084	0.890585	0.949671	0.836277
PLK4	0.946556	0.940764	0.890486	0.949674	0.836706
ZNF280D	0.946556	0.940764	0.890486	0.949674	0.836706
INTS7	0.946944	0.940272	0.890385	0.949677	0.837084
ALDH18A1	0.950318	0.936838	0.890294	0.949679	0.837353
RHOBTB2	0.958414	0.92881	0.890184	0.949682	0.837837
GRAMD1A	0.956841	0.930262	0.890113	0.949684	0.838104
CDH2	0.950058	0.936349	0.889585	0.949691	0.839181
NCAPG	0.945004	0.941256	0.889491	0.949693	0.839453
ZNF507	0.950058	0.935616	0.888889	0.949707	0.841596
MCM5	0.956056	0.929294	0.888456	0.949712	0.842402
ZNF518B	0.954879	0.929778	0.887825	0.949723	0.844008
AKAP1	0.954095	0.930505	0.88779	0.949724	0.844169
SLC8A3	0.955271	0.929294	0.887727	0.949726	0.84449
MSH2	0.945391	0.938308	0.887068	0.949737	0.846104
MAP4K3	0.940492	0.942736	0.886635	0.949745	0.847339
SLITRK3	0.949538	0.933177	0.886087	0.949757	0.849264
MMS19	0.954618	0.92736	0.885274	0.949772	0.851457
RSBN1	0.950708	0.93099	0.885099	0.949777	0.852257
SEMA6B	0.9524	0.929051	0.884829	0.949782	0.853009
RASA4	0.956056	0.92495	0.884304	0.949793	0.854568
UNC5D	0.950578	0.930262	0.884287	0.949794	0.854778
MAGEE1	0.960252	0.920874	0.884271	0.949795	0.854886
FAM115A	0.952139	0.928326	0.883896	0.9498	0.855693
MKL1	0.953052	0.92736	0.883822	0.949802	0.85596
ANKRD44	0.946038	0.933421	0.883051	0.949816	0.857944
ATG9A	0.954879	0.92471	0.882986	0.949816	0.858052
TYRO3	0.949668	0.929051	0.88229	0.949828	0.859759
BCL11A	0.963544	0.915159	0.881796	0.949837	0.861044
SUN1	0.951228	0.926636	0.881442	0.949842	0.8618
ELFN2	0.967244	0.910669	0.88084	0.94985	0.862923
WDR36	0.943325	0.933664	0.880749	0.949851	0.863192
ZFYVE28	0.962094	0.915396	0.880697	0.949854	0.863619
PGR	0.955794	0.921352	0.880623	0.949856	0.863886
FLT3	0.942036	0.934639	0.880464	0.94986	0.864419
MAP3K10	0.957889	0.918249	0.87958	0.949874	0.866513
LPIN2	0.941392	0.934151	0.879403	0.949877	0.866943
SULF1	0.943712	0.931718	0.879274	0.949879	0.867209
[truncated: 139 more rows]

## Sheet: TADA-Denovo-DNMR-SC
	BF.LoF	BF.Mis	BF.total	qval	pval
CUX1	18.2334	3.97707	72.5153	0.207616	2.79192e-05
SCN2A	17.7655	3.93344	69.8796	0.210694	3.06564e-05
YIPF2	0.982737	25.6306	25.1881	0.283789	4.6532e-05
PXT1	19.8774	0.996961	19.817	0.335211	0.000118793
GTF2A2	19.8659	0.99359	19.7385	0.366262	0.00012591
NUPR1	19.8891	0.99026	19.6954	0.387054	0.000129742
PSPH	19.7231	0.98315	19.3907	0.402463	0.000206931
RAB26	19.7077	0.983306	19.3787	0.414038	0.000212405
VPS37C	19.6935	0.977713	19.2546	0.42322	0.000264959
KLF9	19.7213	0.971699	19.1632	0.430684	0.000303827
CD82	19.5943	0.975953	19.1231	0.436839	0.000326819
RRAD	19.6736	0.968877	19.0613	0.442035	0.000365139
IRF2	19.5661	0.969133	18.9621	0.446532	0.00042262
PTEN	19.476	0.973501	18.9599	0.450389	0.000424262
ZNF878	19.4675	0.967343	18.8318	0.453845	0.000501451
RBMS1	19.3863	0.971185	18.8277	0.456872	0.000503093
ZNF776	19.4059	0.969133	18.8069	0.459559	0.000518421
KCNV1	19.5153	0.959466	18.7243	0.462009	0.000572617
RORB	19.3751	0.966067	18.7177	0.464205	0.000574807
NR2F1	19.5576	0.956692	18.7106	0.466187	0.000584113
TFCP2	19.2582	0.966322	18.6096	0.468044	0.000649258
MECP2	19.4844	0.953678	18.5818	0.469749	0.000667871
CYP24A1	19.3779	0.954933	18.5046	0.471352	0.000711666
KLHDC4	19.4199	0.952176	18.4911	0.472828	0.000720972
MFSD2A	19.3361	0.956189	18.4889	0.474188	0.000722067
WDPCP	19.0869	0.954431	18.2172	0.475585	0.000877539
TBX2	19.3138	0.940272	18.1602	0.476908	0.000906553
TCF4	19.1144	0.948932	18.1383	0.478147	0.000915312
FBXL13	19.0457	0.951676	18.1254	0.479307	0.000921881
NAGLU	19.1392	0.946447	18.1143	0.480394	0.000925166
PIK3R2	19.1862	0.943723	18.1064	0.481415	0.000926808
GCC1	19.1972	0.939289	18.0318	0.482404	0.000972245
CTCF	19.1641	0.939535	18.0053	0.483345	0.000976625
TAF6	19.1503	0.938062	17.9642	0.484247	0.00099688
LRCH3	18.9992	0.944713	17.9488	0.485103	0.00100235
DISC1	19.0814	0.939535	17.9277	0.48592	0.00101385
DHX35	18.9336	0.944218	17.8775	0.486712	0.00103739
ANKLE2	18.9992	0.933664	17.7388	0.487514	0.00109432
EMILIN2	19.0019	0.930262	17.6768	0.488296	0.00111403
CACNA2D3	18.9309	0.923989	17.4919	0.489105	0.00119177
SDK1	0.884588	19.401	17.1619	0.489991	0.00129961
SMC5	18.508	0.925432	17.1279	0.490846	0.00131275
ZMYM2	18.4814	0.91801	16.9661	0.491717	0.00135764
ASTN1	18.4867	0.892316	16.496	0.492707	0.00146767
NFASC	18.4495	0.890028	16.4206	0.493678	0.00148026
SYNGAP1	18.4442	0.884797	16.3194	0.49464	0.00149614
ROBO1	18.1315	0.886157	16.0673	0.495644	0.00152406
TCF20	18.0924	0.868907	15.7206	0.496719	0.00156457
RALGAPA1	17.5025	0.87826	15.3717	0.497863	0.00160344
INTS1	18.2334	0.838476	15.2882	0.498988	0.00161603
ITPR2	16.8072	0.830314	13.9552	0.500509	0.00170636
REV3L	16.6159	0.820006	13.6252	0.502083	0.00171949
SRRM2	16.6397	0.768703	12.791	0.503886	0.00173975
SRCAP	16.6635	0.765856	12.7619	0.505633	0.00174139
ANK2	16.0101	0.765874	12.2617	0.50749	0.0017611
ZNF138	0.995921	4.6893	4.67017	0.512761	0.0018246
BLID	0.994433	4.65592	4.63001	0.517872	0.00186128
MAP1LC3B2	0.990894	4.63424	4.59204	0.522828	0.00197131
LYL1	0.989821	4.63283	4.58567	0.527621	0.00201456
YRDC	0.988384	4.62532	4.57159	0.532261	0.00208847
GJB7	0.990283	4.61579	4.57094	0.53675	0.00209449
RAB9B	0.990432	4.61096	4.56685	0.541096	0.0021235
CCDC25	0.984895	4.61969	4.54991	0.545314	0.00226693
APRT	0.986854	4.6091	4.54851	0.5494	0.00228007
EFNA1	0.988953	4.5976	4.54681	0.553362	0.00229321
SOX1	0.988032	4.57672	4.52194	0.557216	0.00258225
SAPCD2	0.981122	4.59837	4.51157	0.560961	0.00272842
SCN1B	0.986827	4.56686	4.5067	0.564598	0.00281053
ZNF691	0.986814	4.54676	4.48681	0.56814	0.00308972
DTWD2	0.983276	4.55733	4.48112	0.571583	0.00315761
BLVRA	0.980854	4.56486	4.47746	0.574931	0.00319921
SCRT2	0.98772	4.53013	4.4745	0.578187	0.00323425
RFC3	0.978169	4.54998	4.45065	0.581366	0.00358187
TIMD4	0.97884	4.52252	4.42682	0.584469	0.00395248
CACNG2	0.982199	4.50131	4.42118	0.587493	0.00404281
MAP2K6	0.970694	4.55044	4.41708	0.590438	0.00410139
NDRG4	0.975493	4.51342	4.40281	0.593314	0.00436963
PSMC3	0.97576	4.50433	4.39515	0.59612	0.00451634
MEF2C	0.977366	4.48323	4.38176	0.59886	0.0047386
MYZAP	0.968702	4.52252	4.38098	0.601532	0.00475119
SMYD5	0.974558	4.49226	4.37797	0.604139	0.00481688
EPHX1	0.974424	4.48023	4.36564	0.606688	0.00505337
CTBP1	0.978706	4.45927	4.36431	0.609177	0.00507418
WDFY1	0.975493	4.47123	4.36165	0.611607	0.00513275
FLVCR1	0.972291	4.48323	4.35901	0.61398	0.00518531
TERF2	0.971759	4.47723	4.35078	0.616303	0.0053156
B3GNT7	0.982064	4.42806	4.34864	0.618572	0.00536158
METTL14	0.964864	4.50433	4.34607	0.620791	0.00541851
INPP5A	0.970429	4.47723	4.34483	0.622961	0.00543658
FBXL2	0.962094	4.50585	4.33505	0.625086	0.00560738
FCRL4	0.966186	4.48624	4.33454	0.627164	0.00561888
GLYCTK	0.977633	4.42954	4.33046	0.629199	0.00569606
CSNK1E	0.975493	4.43843	4.32966	0.631191	0.00571577
CATSPER4	0.970694	4.44734	4.31701	0.633145	0.00591832
NRBP1	0.963807	4.47573	4.31374	0.635059	0.00597197
SIRT1	0.963544	4.47423	4.31111	0.636934	0.00601139
RBPJL	0.970694	4.42658	4.29685	0.638775	0.00627251
KLHL2	0.964071	4.45479	4.29474	0.64058	0.00630372
KLHL10	0.972025	4.40887	4.28554	0.642352	0.00644003
PDE1B	0.966583	4.4325	4.28438	0.644088	0.00646302
CNNM3	0.965524	4.43546	4.28255	0.645791	0.00648382
SPAST	0.96328	4.44437	4.28117	0.647461	0.00650572
TMCC1	0.967244	4.41771	4.27301	0.649101	0.00662944
GLYR1	0.963016	4.41919	4.25575	0.650715	0.00687798
POLA2	0.956187	4.44288	4.24823	0.652301	0.00697268
KCNC3	0.971759	4.3592	4.23609	0.653862	0.00715881
DPY19L4	0.950838	4.43991	4.22164	0.655398	0.00737669
MGAT3	0.976696	4.31738	4.21677	0.656907	0.00744457
MFN1	0.953182	4.42362	4.21652	0.658388	0.00744676
MEPCE	0.963412	4.37665	4.21652	0.659843	0.00744731
ABCG8	0.963148	4.37228	4.21115	0.661273	0.00753052
TACC1	0.956317	4.40152	4.20925	0.662678	0.00754694
MAGEL2	0.954357	4.41035	4.20904	0.664058	0.00754968
TPX2	0.951749	4.41624	4.20315	0.665416	0.00760169
USP26	0.95802	4.37957	4.19571	0.666752	0.00770406
LRRC8D	0.960646	4.36355	4.19183	0.668067	0.00774621
PROX1	0.960909	4.34906	4.17905	0.669363	0.00789292
TLK1	0.950188	4.39419	4.1753	0.670638	0.0079296
CDHR3	0.961041	4.33895	4.1699	0.671894	0.00801117
COG3	0.949928	4.37957	4.16027	0.673131	0.00813489
CTNNB1	0.953443	4.3592	4.15625	0.674349	0.00818799
NAA16	0.947462	4.38103	4.15086	0.675549	0.00826408
TRAF7	0.958807	4.32743	4.14917	0.676729	0.00828981
ARPP21	0.948889	4.37082	4.14742	0.677891	0.00831007
LDB3	0.960778	4.31595	4.14667	0.679035	0.0083243
LRRC41	0.955925	4.29595	4.10661	0.680172	0.00876061
VPS52	0.946167	4.32887	4.09583	0.681294	0.00888214
HCN1	0.949538	4.31022	4.09272	0.682399	0.00891444
CCDC141	0.936515	4.36937	4.09198	0.683487	0.00891772
ZHX2	0.95802	4.27041	4.09114	0.684559	0.00892648
TTC7A	0.951228	4.29738	4.08778	0.685616	0.00896042
TXNDC11	0.951098	4.29738	4.08722	0.686656	0.00897027
SLC9A1	0.958283	4.26335	4.08549	0.687681	0.00898068
BAHD1	0.956056	4.25349	4.06657	0.688697	0.00916078
RASA3	0.950708	4.27041	4.05991	0.689698	0.00922483
ADAM12	0.946426	4.28742	4.05772	0.690686	0.00924618
NEDD4L	0.949278	4.26053	4.04443	0.691663	0.0093699
CLSTN3	0.95253	4.24086	4.03954	0.692626	0.00940111
SLC4A4	0.943841	4.269	4.02926	0.693579	0.00950676
TBC1D2	0.953443	4.22269	4.02609	0.694519	0.00953961
COL9A1	0.934597	4.30593	4.02431	0.695446	0.00955548
LUZP1	0.944487	4.24787	4.01206	0.696363	0.00965293
RIN3	0.957496	4.18527	4.00738	0.697268	0.00969398
LRIG2	0.938694	4.26335	4.00198	0.698162	0.00974873
BTBD11	0.947074	4.22548	4.00184	0.699044	0.00974927
CAND1	0.939335	4.2563	3.9981	0.699915	0.00978048
GTF2I	0.929375	4.27465	3.97276	0.70078	0.00996606
VPS8	0.937411	4.23246	3.96755	0.701634	0.0100005
FAM47C	0.961567	4.12518	3.96664	0.702477	0.0100131
CHL1	0.933576	4.23665	3.95524	0.703312	0.0101325
SALL1	0.950188	4.13874	3.93258	0.704141	0.0103586
CDH4	0.950708	4.12518	3.92184	0.704962	0.0104505
SOGA1	0.936003	4.17976	3.91227	0.705775	0.0105179
SLTM	0.918523	4.21712	3.87352	0.706585	0.0107615
CDK13	0.920281	4.20046	3.8656	0.707388	0.0108113
PLEKHG4B	0.931155	4.11707	3.83363	0.708187	0.010987
JAK3	0.936387	4.09019	3.83	0.708977	0.0110051
MYO6	0.912026	4.18389	3.81582	0.709761	0.0110883
CFTR	0.913895	4.15919	3.80106	0.710538	0.0111753
WRN	0.91215	4.16466	3.7988	0.711305	0.0111879
GAPVD1	0.915268	4.11842	3.76946	0.71207	0.0113308
PLEKHG2	0.925701	4.06884	3.76653	0.712826	0.0113434
CGN	0.913895	4.10091	3.74781	0.713577	0.0114184
PARD3	0.912649	4.0942	3.73657	0.714322	0.0114649
GRIN2B	0.929629	3.97965	3.6996	0.715065	0.0116188
ADAMTS12	0.915518	4.03444	3.69361	0.715801	0.0116396
DAPK1	0.923302	3.98224	3.67681	0.716532	0.011691
MAP3K4	0.90533	4.05027	3.66683	0.717257	0.0117288
TDRD6	0.910782	3.98872	3.63285	0.71798	0.0118137
LRP6	0.892946	4.03971	3.60724	0.7187	0.0119034
SCRIB	0.921286	3.87411	3.56917	0.719421	0.0120129
AHDC1	0.931409	3.80979	3.54847	0.720137	0.0120896
SHROOM3	0.912399	3.88664	3.54617	0.720845	0.0121005
UNC13C	0.89575	3.94493	3.53367	0.721549	0.0121388
SCN8A	0.912524	3.86537	3.52725	0.722245	0.0121553
CHD2	0.883023	3.97319	3.50842	0.722937	0.0122138
SCN1A	0.887002	3.92962	3.48558	0.723627	0.0122691
LAMB1	0.884709	3.93599	3.4822	0.72431	0.0122877
GBF1	0.886882	3.90426	3.46262	0.724989	0.0123452
CASZ1	0.921412	3.73008	3.43694	0.725665	0.0124333
PLXND1	0.906566	3.76484	3.41308	0.72634	0.01247
USP24	0.874763	3.85045	3.36823	0.727016	0.0125494
LRP4	0.890515	3.7745	3.36125	0.727686	0.0125604
NAV3	0.876433	3.83437	3.36057	0.728349	0.012562
PLCE1	0.868711	3.83807	3.33417	0.729011	0.0126102
CHD9	0.86282	3.73604	3.22353	0.729688	0.0128226
SPTBN4	0.882422	3.62934	3.20261	0.730362	0.0128467
NSD1	0.861647	3.70752	3.19457	0.731031	0.0128543
IGF2R	0.868711	3.64435	3.16589	0.731698	0.0128998
TLN2	0.860475	3.58366	3.08365	0.732375	0.0130021
FLNB	0.868711	3.51208	3.05098	0.733052	0.0130306
XIRP2	0.84425	3.55324	2.99982	0.733732	0.0130881
FBN1	0.831729	3.53871	2.94325	0.734417	0.0131204
USP34	0.793175	3.5298	2.79975	0.735124	0.0132025
CSMD2	0.818292	3.24326	2.65393	0.735854	0.0133071
BSN	0.831729	3.06489	2.54915	0.736598	0.0133613
RYR2	0.789959	3.02217	2.38739	0.737368	0.0134467
KIAA1109	0.742338	3.15794	2.34426	0.73814	0.0134724
HYDIN	0.750397	2.9278	2.19701	0.738935	0.0135025
HMCN1	0.720643	2.93812	2.11734	0.739739	0.0135441
MDN1	0.709093	2.91134	2.06441	0.740546	0.0135561
C16orf74	0.997917	0.99941	0.997328	0.741584	0.0136766
C17orf89	0.997945	0.999178	0.997124	0.742611	0.0137313
RPL41	0.997945	0.998639	0.996586	0.743629	0.0137861
APLN	0.997835	0.99845	0.996288	0.744636	0.0138408
SLN	0.998588	0.997432	0.996024	0.745634	0.0139054
PRAC	0.997849	0.998132	0.995985	0.746622	0.0139601
BAGE4	0.998273	0.997421	0.995699	0.747601	0.0140149
C7orf49	0.997712	0.997943	0.99566	0.74857	0.0140685
TMSB15B	0.998013	0.997549	0.995567	0.749531	0.0141233
PMAIP1	0.997862	0.997589	0.995457	0.750482	0.014178
OCLM	0.997903	0.997488	0.995397	0.751424	0.0142328
C9orf103	0.997247	0.997879	0.995132	0.752357	0.0142875
TMSB15A	0.997438	0.997565	0.995009	0.753282	0.0143423
BAGE2	0.996317	0.998202	0.994525	0.754198	0.0144517
BAGE3	0.996317	0.998202	0.994525	0.755106	0.0144517
C10orf55	0.995825	0.998503	0.994334	0.756005	0.0145065
KRTAP22-1	0.997329	0.996987	0.994324	0.756896	0.0145612
ASCL2	0.994856	0.999271	0.994131	0.757779	0.0146707
DEFB119	0.997137	0.996934	0.99408	0.758654	0.0147255
C19orf76	0.995907	0.998143	0.994058	0.759521	0.0147802
DEFB121	0.997069	0.996801	0.993879	0.760381	0.0148349
SPHAR	0.997247	0.996615	0.993871	0.761232	0.0148897
ATP5E	0.996727	0.997094	0.99383	0.762076	0.0149444
SLC48A1	0.99603	0.997786	0.993825	0.762913	0.0149992
FAM122C	0.996713	0.997014	0.993737	0.763742	0.0150539
ACYP1	0.997383	0.996296	0.993689	0.764564	0.0151081
KRTAP2-1	0.996126	0.997552	0.993687	0.765378	0.0151629
KRTAP2-4	0.996126	0.997525	0.99366	0.766186	0.0152176
GNG10	0.997124	0.996509	0.993642	0.766986	0.0152723
TMSB10	0.997808	0.995818	0.993635	0.76778	0.0153271
C1orf204	0.993602	0.999953	0.993555	0.768567	0.0153818
GNG7	0.997438	0.996083	0.993532	0.769347	0.0154366
KRTAP19-2	0.997069	0.996429	0.993508	0.77012	0.0154913
FAM165B	0.996727	0.996748	0.993486	0.770887	0.0155455
TMSB4X	0.997397	0.995924	0.993332	0.771647	0.0156003
HILPDA	0.997329	0.995924	0.993264	0.772401	0.015655
C1orf122	0.996604	0.996535	0.993151	0.773149	0.0157097
PLN	0.997438	0.995685	0.993134	0.77389	0.0157645
C2orf83	0.996426	0.996642	0.99308	0.774625	0.0158192
IGIP	0.997753	0.995234	0.992997	0.775354	0.015874
C10orf113	0.996864	0.99611	0.992986	0.776077	0.0159287
ATOX1	0.997616	0.995287	0.992914	0.776794	0.0159835
DEFB134	0.99659	0.996296	0.992899	0.777506	0.0160382
KRTAP20-1	0.9967	0.996163	0.992875	0.778211	0.016093
DEFB4A	0.997042	0.995818	0.992872	0.778911	0.0161477
SPANXN4	0.996563	0.996243	0.992819	0.779605	0.0162024
DEFB107B	0.996877	0.995871	0.992761	0.780293	0.0163119
DEFB107A	0.996877	0.995871	0.992761	0.780976	0.0163119
RPL39L	0.996221	0.996482	0.992717	0.781654	0.0163667
KRTAP23-1	0.996918	0.995765	0.992696	0.782326	0.0164214
DEFB110	0.996358	0.996323	0.992694	0.782993	0.0164762
FXYD2	0.996508	0.996163	0.992685	0.783654	0.0165309
ST20	0.996959	0.995711	0.992684	0.78431	0.0165856
LSM5	0.99603	0.996588	0.992632	0.784961	0.0166404
SPRN	0.995593	0.996987	0.992594	0.785607	0.0166951
C10orf116	0.996563	0.996004	0.99258	0.786249	0.0167499
TOMM7	0.996167	0.996349	0.99253	0.786885	0.0168046
DEFB106A	0.997042	0.995446	0.992501	0.787516	0.0169141
DEFB106B	0.997042	0.995446	0.992501	0.788142	0.0169141
KRTAP19-6	0.996877	0.995605	0.992496	0.788764	0.0169689
TARP	0.995757	0.996721	0.992492	0.78938	0.017023
LYRM4	0.995375	0.997094	0.992482	0.789992	0.0170778
HSBP1	0.997055	0.995313	0.992382	0.7906	0.017132
MT1A	0.99618	0.996163	0.992358	0.791203	0.0171867
DEFB131	0.996495	0.995844	0.992354	0.791801	0.0172415
S100G	0.996276	0.996057	0.992348	0.792395	0.0172962
DEFB1	0.996631	0.995685	0.992331	0.792984	0.017351
DNAJC25-GNG10	0.995061	0.997254	0.992328	0.793569	0.0174057
CD52	0.997042	0.995234	0.992289	0.79415	0.0174604
STRA13	0.996426	0.995818	0.992259	0.794727	0.0175152
CYB561D1	0.995238	0.996961	0.992213	0.795299	0.0175699
ZBED3	0.993738	0.998428	0.992176	0.795867	0.0176241
HTN3	0.995265	0.996881	0.992161	0.796431	0.0176789
COX7C	0.996823	0.995313	0.992151	0.796991	0.0177336
SPANXN5	0.99644	0.995685	0.99214	0.797546	0.0177884
ATP5I	0.996317	0.995791	0.992124	0.798098	0.0178431
POLE4	0.994733	0.997333	0.992081	0.798646	0.0178978
GNG12	0.996508	0.995526	0.99205	0.79919	0.0179526
USMG5	0.995484	0.996509	0.992008	0.79973	0.0180068
PCP4L1	0.996344	0.995632	0.991992	0.800266	0.0180615
MT1X	0.996249	0.995711	0.991976	0.800798	0.0181163
CCDC23	0.996044	0.995844	0.991904	0.801327	0.018171
C6orf48	0.996249	0.995632	0.991897	0.801851	0.0182258
CCDC72	0.997165	0.994676	0.991856	0.802373	0.0182805
GNG2	0.996864	0.994968	0.991848	0.80289	0.0183352
COX7B2	0.996413	0.995313	0.991743	0.803404	0.01839
GNGT2	0.99659	0.995101	0.991708	0.803915	0.0184447
KRTAP19-7	0.996495	0.99518	0.991692	0.804421	0.0184995
RMI2	0.994924	0.996721	0.991662	0.804925	0.0185542
MT1G	0.996098	0.995526	0.991641	0.805425	0.018609
MT4	0.996098	0.995446	0.991562	0.805921	0.0186637
FKBP1B	0.995593	0.995951	0.991561	0.806414	0.0187174
MIR205HG	0.996303	0.995234	0.991555	0.806904	0.0187721
RPL39	0.995347	0.996163	0.991528	0.80739	0.0188268
DEFB123	0.995907	0.995552	0.991477	0.807874	0.018881
SEC61G	0.996358	0.995101	0.991477	0.808354	0.0189352
C9orf16	0.996672	0.994756	0.991446	0.80883	0.0189894
HTN1	0.995061	0.996349	0.991428	0.809304	0.0190442
SPANXN1	0.996303	0.995101	0.991422	0.809774	0.0190989
SPINK8	0.996317	0.995074	0.991409	0.810241	0.0191537
SRP9	0.996071	0.995313	0.991403	0.810705	0.0192084
ZNF771	0.99171	0.999671	0.991384	0.811166	0.0192632
MT1B	0.996153	0.995207	0.991378	0.811625	0.0193179
DEFB108B	0.996809	0.994544	0.99137	0.81208	0.0193726
MT1H	0.996003	0.99534	0.991361	0.812532	0.0194274
CHCHD7	0.995866	0.995446	0.991331	0.812981	0.0194821
SFTA2	0.996098	0.995207	0.991324	0.813427	0.0195358
SPRR2G	0.996085	0.995207	0.99131	0.81387	0.0195905
SPRR2E	0.99603	0.99526	0.991309	0.814311	0.0196453
COX14	0.99588	0.995366	0.991265	0.814748	0.0197
SPRR2D	0.995948	0.995287	0.991254	0.815183	0.0197547
YAF2	0.99573	0.995472	0.991221	0.815615	0.0198089
GNG11	0.996303	0.994889	0.991211	0.816045	0.0198637
SPRR2F	0.995989	0.995154	0.991162	0.816471	0.0199184
DEFB124	0.996303	0.994809	0.991132	0.816895	0.0200274
KRTAP8-1	0.996741	0.994358	0.991117	0.817316	0.0200821
C14orf2	0.995511	0.995579	0.99111	0.817735	0.0201369
LRTOMT	0.991818	0.999263	0.991088	0.818151	0.0201916
44531	0.995388	0.995658	0.991067	0.818564	0.0202463
MT1M	0.996344	0.994703	0.991067	0.818975	0.0203011
ZNF706	0.99573	0.995313	0.991063	0.819383	0.0203558
SPRR2B	0.995975	0.995048	0.991043	0.819789	0.0204106
POLR2K	0.995279	0.995738	0.991037	0.820192	0.0204653
NREP	0.996153	0.994862	0.991035	0.820593	0.0205201
MT1F	0.996044	0.994968	0.991032	0.820991	0.0205748
PCSK1N	0.993111	0.997903	0.991029	0.821387	0.0206296
SPRR2A	0.995935	0.995074	0.991029	0.82178	0.0206843
SMR3B	0.996344	0.99465	0.991014	0.822171	0.020739
GNG5	0.9967	0.994252	0.990971	0.82256	0.0207938
KRTAP20-2	0.996618	0.994332	0.990968	0.822946	0.0208485
COX17	0.996932	0.994014	0.990964	0.82333	0.0209033
KRTAP6-1	0.996344	0.994491	0.990855	0.823712	0.020958
LYRM7	0.994801	0.99603	0.990852	0.824091	0.0210128
GLRX5	0.994665	0.996163	0.990849	0.824468	0.021067
STATH	0.995047	0.995765	0.990833	0.824843	0.0211211
TMEM160	0.994011	0.996801	0.990831	0.825216	0.0211759
C3orf55	0.995388	0.995366	0.990776	0.825587	0.0212306
GTF2H5	0.995552	0.99518	0.990754	0.825955	0.0212854
KRTAP21-1	0.996235	0.994491	0.990746	0.826321	0.0213401
DEFB115	0.99573	0.994995	0.990746	0.826685	0.0213949
DEFB114	0.996577	0.994146	0.990743	0.827047	0.0214496
C18orf32	0.996249	0.994464	0.990734	0.827407	0.0215044
HIGD1C	0.995156	0.995552	0.99073	0.827764	0.0215591
C6orf225	0.996344	0.994358	0.990723	0.82812	0.0216138
GNG4	0.996686	0.994014	0.990719	0.828473	0.021668
HMGA2	0.99487	0.995765	0.990656	0.828825	0.0217228
MT2A	0.996044	0.99457	0.990635	0.829174	0.0217775
MT3	0.995661	0.994942	0.990625	0.829522	0.0218323
DEFB105B	0.995579	0.995021	0.990623	0.829867	0.0219418
DEFB105A	0.995579	0.995021	0.990623	0.830211	0.0219418
MT1E	0.996044	0.994544	0.990609	0.830552	0.0219959
CLPSL2	0.996727	0.993855	0.990602	0.830892	0.0220507
SERP2	0.996085	0.994491	0.990597	0.83123	0.0221049
ATP6V0E2	0.995443	0.995127	0.990592	0.831566	0.0221596
SCGB3A2	0.995784	0.994756	0.990562	0.8319	0.0222144
TMEM167B	0.996085	0.994438	0.990544	0.832232	0.0222691
DEFB128	0.995894	0.994623	0.990539	0.832562	0.0223239
GNG13	0.996235	0.994279	0.990535	0.83289	0.0223786
ATP6V1G3	0.994529	0.995977	0.990528	0.833217	0.0224333
ADIG	0.995948	0.994544	0.990514	0.833542	0.0224881
PCP4	0.995006	0.995472	0.990501	0.833864	0.0225428
PKIA	0.994815	0.995658	0.990496	0.834186	0.022597
LENEP	0.99588	0.99457	0.990472	0.834505	0.0226512
C1orf31	0.995156	0.995287	0.990466	0.834823	0.022706
FAM89B	0.993711	0.996721	0.990453	0.835139	0.0227607
PF4	0.995593	0.994835	0.990451	0.835453	0.0228155
MTCP1NB	0.995948	0.994464	0.990435	0.835765	0.0228702
DEFB113	0.995675	0.994729	0.990427	0.836076	0.0229249
MILR1	0.996303	0.994067	0.990392	0.836385	0.0229797
ANAPC13	0.994829	0.995526	0.990377	0.836693	0.0230344
ENHO	0.996809	0.993537	0.990366	0.836999	0.0230892
WFDC10B	0.99532	0.995021	0.990365	0.837303	0.0231439
HSPB6	0.995143	0.99518	0.990346	0.837605	0.0231987
C5orf58	0.996358	0.993961	0.990341	0.837906	0.0232534
C8orf22	0.995498	0.994809	0.99033	0.838206	0.0233082
XAGE1B	0.996303	0.993987	0.990313	0.838503	0.0235271
XAGE1C	0.996303	0.993987	0.990313	0.8388	0.0235271
XAGE1D	0.996303	0.993987	0.990313	0.839094	0.0235271
XAGE1A	0.996303	0.993987	0.990313	0.839387	0.0235271
C8orf59	0.996372	0.993908	0.990301	0.839679	0.0235813
GPX1	0.996795	0.993484	0.9903	0.839969	0.0236355
GNGT1	0.994924	0.995313	0.990261	0.840257	0.0236897
HOPX	0.995825	0.994411	0.99026	0.840544	0.0237445
CTF1	0.993384	0.996854	0.990259	0.84083	0.0237992
SELK	0.996112	0.994093	0.990228	0.841114	0.0238539
SPINK2	0.994515	0.995685	0.990224	0.841396	0.0239087
GNG3	0.996713	0.993484	0.990219	0.841677	0.0239634
FAM104B	0.995061	0.995127	0.990212	0.841957	0.0240182
NPS	0.995484	0.994703	0.990211	0.842235	0.0240729
GYPE	0.995593	0.99457	0.990187	0.842512	0.0241271
SPINK6	0.995074	0.995074	0.990173	0.842788	0.0241819
SPRR4	0.995197	0.994942	0.990163	0.843062	0.0242366
MLLT11	0.996071	0.99404	0.990135	0.843334	0.0242913
UQCR11	0.996645	0.993457	0.990124	0.843605	0.0243461
C3orf79	0.995661	0.994438	0.990123	0.843875	0.0244008
PPY	0.995921	0.994173	0.990117	0.844144	0.0244556
PRHOXNB	0.99472	0.995366	0.99011	0.844411	0.0245103
PKIB	0.996249	0.993828	0.9901	0.844677	0.0245651
DEFB104B	0.996235	0.993828	0.990086	0.844941	0.0246745
DEFB104A	0.996235	0.993828	0.990086	0.845204	0.0246745
CAMK2N1	0.996891	0.993166	0.990078	0.845466	0.0247293
ZNF124	0.995006	0.995021	0.990052	0.845727	0.024784
FAM47E-STBD1	0.990595	0.99945	0.99005	0.845986	0.0248388
C11orf75	0.997329	0.99269	0.990038	0.846244	0.0248935
SLC39A3	0.996467	0.99351	0.990001	0.846501	0.0249477
S100A12	0.995825	0.994146	0.989996	0.846756	0.0250025
C6orf223	0.994679	0.99526	0.989964	0.84701	0.0250572
XAGE1E	0.995948	0.993987	0.98996	0.847263	0.025112
CITED4	0.994692	0.995234	0.989951	0.847515	0.0251661
KRTAP19-8	0.99487	0.995048	0.989943	0.847766	0.0252209
CARD18	0.995648	0.994252	0.989925	0.848015	0.0252756
KNCN	0.996987	0.992901	0.98991	0.848263	0.0253304
SPRR1B	0.99517	0.994703	0.989898	0.84851	0.0253851
C5orf43	0.99487	0.994995	0.98989	0.848756	0.0254393
S100A6	0.995948	0.993908	0.98988	0.849	0.0254941
HEPN1	0.995716	0.994093	0.989834	0.849244	0.0255488
SPINK7	0.995033	0.994756	0.989815	0.849486	0.0256035
LYRM5	0.995006	0.994782	0.989815	0.849727	0.0256583
TNP1	0.996194	0.99359	0.989808	0.849967	0.0257678
IAPP	0.996194	0.99359	0.989808	0.850206	0.0257678
SPRR1A	0.995129	0.99465	0.989805	0.850443	0.025822
C17orf108	0.995457	0.994305	0.989788	0.85068	0.0258767
SNRPF	0.994679	0.995074	0.989779	0.850915	0.0259315
NDUFC1	0.99367	0.996057	0.989752	0.851149	0.0259862
PDE6H	0.99562	0.994093	0.989739	0.851383	0.0260409
AIF1	0.994447	0.99526	0.989733	0.851615	0.0260957
LEAP2	0.995743	0.993961	0.98973	0.851846	0.0261504
KRTAP19-4	0.995948	0.993749	0.989722	0.852076	0.0262052
PYDC2	0.995648	0.99404	0.989714	0.852304	0.0262599
C2orf88	0.995661	0.994014	0.989701	0.852532	0.0263147
LCE4A	0.995388	0.994279	0.989693	0.852759	0.0263694
DIRC1	0.995689	0.993961	0.989675	0.852985	0.0264231
PPP1R1C	0.995607	0.994014	0.989647	0.853209	0.0264778
HMGN4	0.995293	0.994305	0.989625	0.853433	0.0265325
S100A10	0.995866	0.993722	0.989614	0.853656	0.0265873
MOBP	0.995839	0.993722	0.989587	0.853877	0.0266415
PLGLB1	0.994801	0.994756	0.989585	0.854098	0.0267504
PLGLB2	0.994801	0.994756	0.989585	0.854317	0.0267504
WFDC10A	0.994651	0.994862	0.989541	0.854536	0.0268052
TMEM167A	0.994433	0.995074	0.989535	0.854754	0.0268599
CTXN3	0.995634	0.993855	0.989515	0.85497	0.0269147
BANF2	0.995361	0.99412	0.989508	0.855186	0.0269694
C4orf6	0.995743	0.993722	0.989492	0.855401	0.0270241
FAM150B	0.994283	0.99518	0.989491	0.855614	0.0270789
C3orf35	0.994624	0.994835	0.989487	0.855827	0.0271336
SPINK1	0.99517	0.994279	0.989476	0.856039	0.0271884
COX6A2	0.99573	0.993696	0.989452	0.85625	0.0272431
SERP1	0.996126	0.993298	0.98945	0.85646	0.0272979
SPTSSB	0.994979	0.994438	0.989444	0.856669	0.0273526
DEFB136	0.996167	0.993245	0.989438	0.856877	0.0274073
RASL10A	0.995648	0.993749	0.989423	0.857084	0.0274615
SCGB2B2	0.995757	0.993616	0.9894	0.85729	0.0275163
S100A5	0.996071	0.993298	0.989396	0.857495	0.0275705
NDUFA1	0.99588	0.993457	0.989364	0.8577	0.0276247
MIF	0.996098	0.993219	0.989344	0.857903	0.0276789
OSTBETA	0.994624	0.994676	0.989329	0.858106	0.0277336
POLR2L	0.996659	0.99261	0.989294	0.858308	0.0277884
BLCAP	0.996167	0.993087	0.98928	0.858508	0.0278431
SMAGP	0.996262	0.992954	0.989243	0.858708	0.0278978
MRPL52	0.993411	0.995791	0.98923	0.858908	0.0279526
SPINK9	0.994761	0.994438	0.989227	0.859106	0.0280073
S100B	0.995853	0.993325	0.989205	0.859303	0.0280621
C12orf76	0.99416	0.994942	0.989132	0.8595	0.0281168
EIF4EBP3	0.994351	0.994729	0.989111	0.859696	0.0281716
DEFB127	0.995252	0.993828	0.989109	0.859891	0.0282263
ZNF559	0.993547	0.995526	0.989102	0.860085	0.0282811
RPS27	0.99502	0.99404	0.989089	0.860278	0.0283358
SVIP	0.994911	0.994146	0.989086	0.86047	0.0283905
MRPL33	0.994747	0.994305	0.989082	0.860662	0.0284453
SCGB3A1	0.996126	0.992928	0.989081	0.860853	0.0285
WFDC6	0.995347	0.993696	0.989072	0.861043	0.0285548
NDUFB3	0.99502	0.994014	0.989063	0.861232	0.0286095
RPS27L	0.994747	0.994279	0.989056	0.86142	0.0286643
DPH3	0.995484	0.993537	0.98905	0.861608	0.028719
UQCR10	0.997767	0.991236	0.989023	0.861794	0.0287737
SMPX	0.995184	0.993802	0.989015	0.861981	0.0288285
FXYD7	0.994583	0.994385	0.988998	0.862166	0.0288832
C9orf153	0.995006	0.993961	0.988997	0.86235	0.028938
CCL7	0.994856	0.994093	0.988979	0.862534	0.0289927
CRIP1	0.995334	0.99359	0.988953	0.862717	0.0290475
NPB	0.995784	0.99314	0.988953	0.862899	0.0291022
SHFM1	0.993752	0.995154	0.988936	0.86308	0.0291564
KRTAP19-3	0.995375	0.99351	0.988915	0.863261	0.0292106
CLLU1OS	0.994842	0.99404	0.988913	0.863441	0.0292653
CCL13	0.995129	0.993749	0.988908	0.86362	0.0293201
SFTA3	0.995975	0.992901	0.988905	0.863799	0.0293748
BRK1	0.996864	0.992002	0.988891	0.863976	0.0294296
COA5	0.99532	0.993537	0.988887	0.864153	0.0294843
CMC2	0.994651	0.994199	0.988881	0.86433	0.0295391
S100A13	0.995579	0.993272	0.988881	0.864505	0.0295938
LCE3C	0.995784	0.99306	0.988874	0.86468	0.0296485
FAM150A	0.993152	0.995685	0.988867	0.864854	0.0297033
SCGB2A2	0.995006	0.993828	0.988865	0.865028	0.0297575
CNPY1	0.99502	0.993802	0.988852	0.8652	0.0298122
C7orf69	0.993929	0.994862	0.988822	0.865372	0.029867
EIF4EBP1	0.995402	0.993378	0.98881	0.865544	0.0299212
C17orf50	0.994597	0.994173	0.988801	0.865714	0.0299759
SCGB1A1	0.995429	0.993325	0.988785	0.865884	0.0300307
HMGN2	0.993997	0.994756	0.988784	0.866054	0.0300854
GUCA2A	0.994897	0.993828	0.988757	0.866222	0.0301401
DAOA	0.993643	0.995074	0.988748	0.86639	0.0301943
S100A8	0.995757	0.992954	0.988741	0.866558	0.0302485
ZNF673	0.994952	0.993749	0.988732	0.866724	0.0303033
RBAK-LOC389458	0.993888	0.994809	0.988729	0.86689	0.030358
UBE2A	0.995306	0.993378	0.988715	0.867055	0.0304128
COX8A	0.996973	0.991712	0.98871	0.86722	0.0304675
C11orf10	0.995375	0.993298	0.988704	0.867384	0.0305223
C10orf99	0.99442	0.994252	0.988704	0.867547	0.030577
ZNF780A	0.993111	0.995552	0.988694	0.86771	0.0306317
DEFA6	0.995457	0.993193	0.98868	0.867872	0.0306865
C20orf166	0.995429	0.993219	0.988679	0.868034	0.0307412
SCRG1	0.995607	0.993034	0.988671	0.868195	0.030796
SCGB2A1	0.995047	0.99359	0.988668	0.868355	0.0308507
ABRACL	0.99487	0.993749	0.98865	0.868514	0.0309602
FAM32A	0.99487	0.993749	0.98865	0.868673	0.0309602
WFDC13	0.995006	0.99359	0.988628	0.868832	0.0310149
FAM24B	0.995771	0.992796	0.988597	0.868989	0.0310697
KRTAP21-2	0.99431	0.994252	0.988595	0.869147	0.0311244
CCL18	0.994897	0.993643	0.988572	0.869303	0.0311786
CRIPT	0.993915	0.994623	0.988571	0.869459	0.0312334
MANBAL	0.996249	0.992293	0.988571	0.869614	0.0312881
S100A4	0.995607	0.992928	0.988566	0.869769	0.0313429
DEFB135	0.994965	0.993563	0.988561	0.869923	0.0313976
TRIAP1	0.995989	0.992531	0.98855	0.870077	0.0314518
LST1	0.99431	0.994199	0.988543	0.87023	0.0315065
COX19	0.995156	0.993351	0.98854	0.870382	0.0315613
SERTM1	0.995702	0.992796	0.988529	0.870534	0.031616
CCL1	0.994747	0.993749	0.988528	0.870685	0.0316708
KRTAP3-2	0.99588	0.99261	0.988521	0.870836	0.0317255
FKBP1A	0.994201	0.994279	0.988513	0.870986	0.0317797
IL8	0.994379	0.994093	0.988505	0.871136	0.0318345
S100A1	0.995784	0.99269	0.988505	0.871285	0.0318892
SPTSSA	0.99588	0.992584	0.988494	0.871433	0.0319439
S100A2	0.994447	0.994014	0.988494	0.871581	0.0319981
SCGB1D1	0.99532	0.993087	0.988439	0.871728	0.0320529
GCHFR	0.995689	0.992716	0.988436	0.871875	0.0321076
MZT1	0.995866	0.992531	0.988428	0.872021	0.0321624
PKIG	0.99629	0.992108	0.988427	0.872167	0.0322171
WFDC9	0.994692	0.993696	0.988421	0.872312	0.0322719
RPL36A	0.994897	0.993484	0.988414	0.872457	0.0323266
GYPB	0.995238	0.99314	0.98841	0.872601	0.0323813
APOC1	0.99547	0.992901	0.988404	0.872744	0.0324361
CXorf1	0.994992	0.993378	0.988403	0.872887	0.0324903
C5orf46	0.994665	0.993696	0.988394	0.87303	0.032545
CCL8	0.994992	0.993325	0.988351	0.873172	0.0325998
HMGN3	0.994011	0.994305	0.98835	0.873313	0.0326545
S100A7L2	0.995702	0.99261	0.988344	0.873454	0.0327093
CXCL3	0.994597	0.993696	0.988327	0.873595	0.0327635
CMC1	0.994256	0.994014	0.988304	0.873735	0.0328182
SAA2	0.994624	0.993643	0.988301	0.873874	0.0328724
LELP1	0.995074	0.993166	0.988274	0.874013	0.0329271
ATP6V0E1	0.994992	0.993245	0.988272	0.874151	0.0329819
CYCS	0.99532	0.992901	0.988255	0.874289	0.0330366
DEFB132	0.995074	0.99314	0.988248	0.874427	0.0330914
MAP6D1	0.991941	0.996269	0.98824	0.874564	0.0331456
MYCBP	0.99427	0.993934	0.988238	0.8747	0.0332003
CCL2	0.994952	0.993245	0.988231	0.874836	0.0332551
KRTAP9-9	0.994147	0.99404	0.988222	0.874972	0.0333098
ARMS2	0.994952	0.993219	0.988205	0.875107	0.0333645
DEFB103B	0.994242	0.993908	0.988185	0.875241	0.033474
DEFB103A	0.994242	0.993908	0.988185	0.875375	0.033474
BHLHA15	0.994638	0.99351	0.988183	0.875509	0.0335288
PTMS	0.993806	0.994332	0.988173	0.875642	0.0335835
CXCL2	0.994229	0.993908	0.988171	0.875774	0.0336383
C2orf66	0.995224	0.992901	0.98816	0.875906	0.033693
CCL4	0.994952	0.993166	0.988152	0.876038	0.0337477
C16orf3	0.995798	0.99232	0.98815	0.876169	0.0338025
SCGB1D4	0.993588	0.994517	0.98814	0.8763	0.0338572
LOC100129083	0.993547	0.994544	0.988126	0.87643	0.033912
CDC42SE1	0.994338	0.993749	0.988122	0.87656	0.0339667
C6orf162	0.995552	0.992531	0.988116	0.87669	0.0340215
WBP5	0.994488	0.99359	0.988113	0.876818	0.0340762
C19orf33	0.994924	0.99314	0.988099	0.876947	0.0341309
CYS1	0.994256	0.993802	0.988093	0.877075	0.0341857
MEIG1	0.994883	0.99314	0.988058	0.877203	0.0342404
FAM24A	0.995743	0.992267	0.988043	0.87733	0.0342952
ACBD7	0.994229	0.993775	0.98804	0.877456	0.0343499
CSTB	0.994447	0.993537	0.988019	0.877583	0.0344047
S100A7	0.995825	0.992161	0.988019	0.877709	0.0344589
TIMM9	0.99303	0.994942	0.988006	0.877834	0.0345136
HBQ1	0.995156	0.992769	0.98796	0.877959	0.0345683
NEDD8	0.993615	0.994305	0.987957	0.878083	0.0346231
COX8C	0.997206	0.990709	0.98794	0.878208	0.0346778
MPV17L	0.992186	0.995711	0.987931	0.878331	0.034732
KRTAP3-3	0.994829	0.99306	0.987925	0.878455	0.0347862
LCE3A	0.995935	0.991949	0.987917	0.878577	0.034841
C14orf178	0.994501	0.993378	0.987916	0.8787	0.0348957
LCE3B	0.99442	0.993457	0.987913	0.878822	0.0349505
C4orf34	0.99431	0.993563	0.98791	0.878944	0.0350052
TLX1NB	0.995061	0.992796	0.987892	0.879065	0.0350599
DAPL1	0.99352	0.994332	0.987888	0.879186	0.0351147
COX6C	0.995347	0.992505	0.987887	0.879306	0.0351689
NDUFA11	0.992853	0.994995	0.987883	0.879426	0.0352236
C15orf48	0.993534	0.994305	0.987875	0.879545	0.0352773
SS18L2	0.995361	0.992478	0.987874	0.879665	0.035332
CXCL10	0.994583	0.993245	0.987865	0.879783	0.0353868
C10orf125	0.993997	0.993828	0.987862	0.879902	0.0354415
SYS1	0.995293	0.992531	0.987859	0.88002	0.0354963
PRCD	0.993084	0.994729	0.98785	0.880137	0.035551
METTL23	0.994747	0.993034	0.987817	0.880255	0.0356057
SUMO4	0.99457	0.993193	0.987799	0.880371	0.0356605
GNG8	0.996823	0.990946	0.987798	0.880488	0.0357152
TAL2	0.995443	0.99232	0.987797	0.880604	0.0357694
C1orf227	0.99416	0.99359	0.987788	0.88072	0.0358242
C4orf32	0.99322	0.994517	0.987775	0.880835	0.0358789
KRTAP6-3	0.995033	0.99269	0.987759	0.88095	0.0359337
S100A11	0.995074	0.992637	0.987747	0.881064	0.0359884
FDCSP	0.994092	0.993616	0.987746	0.881178	0.0360431
RPLP1	0.994692	0.993007	0.987737	0.881292	0.0360979
DLEU7	0.995143	0.992558	0.987736	0.881406	0.0361526
KRTAP3-1	0.99588	0.991817	0.987731	0.881519	0.0362068
C12orf23	0.994938	0.992743	0.987717	0.881631	0.0362616
SPINK4	0.994733	0.992928	0.987698	0.881744	0.0363163
DEFA1B	0.995306	0.992346	0.987688	0.881856	0.0364805
DEFA3	0.995306	0.992346	0.987688	0.881967	0.0364805
DEFA1	0.995306	0.992346	0.987688	0.882078	0.0364805
SEPW1	0.995566	0.992082	0.987682	0.882189	0.0365347
KRTAP19-5	0.99532	0.99232	0.987676	0.8823	0.0365895
CYSTM1	0.994229	0.993404	0.987671	0.88241	0.0366442
S100A7A	0.99573	0.991897	0.987661	0.88252	0.036699
COX7A2	0.994215	0.993404	0.987657	0.882629	0.0367532
LSM7	0.996413	0.99121	0.987654	0.882738	0.0368079
CDC42EP5	0.995634	0.991976	0.987645	0.882847	0.0368621
TIMM10	0.994542	0.99306	0.98764	0.882955	0.0369168
WFDC11	0.993207	0.994385	0.987629	0.883063	0.0369716
ATP6V1G1	0.995293	0.992293	0.987622	0.883171	0.0370263
PFDN1	0.993888	0.993696	0.987622	0.883278	0.0371358
CCL11	0.993888	0.993696	0.987622	0.883385	0.0371358
MLN	0.994597	0.992981	0.987616	0.883492	0.03719
C11orf94	0.994488	0.993087	0.987612	0.883598	0.0372448
IP6K2	0.994242	0.993325	0.987606	0.883704	0.037299
ZNF580	0.994256	0.993272	0.987566	0.88381	0.0373537
INSL3	0.993615	0.993908	0.987562	0.883915	0.0374084
PROK2	0.993683	0.993828	0.98755	0.88402	0.0374632
MINOS1	0.993615	0.993881	0.987535	0.884125	0.0375179
TOMM5	0.993534	0.993961	0.987533	0.884229	0.0375727
TCEAL7	0.99573	0.991765	0.987529	0.884333	0.0376263
KRTAP12-4	0.995238	0.99224	0.987515	0.884437	0.0376805
DEFB116	0.993779	0.993696	0.987514	0.88454	0.0377347
APOA2	0.994651	0.992822	0.987512	0.884643	0.0377889
PRR13	0.993983	0.993484	0.987506	0.884746	0.0378437
SPINK14	0.993929	0.993537	0.987505	0.884849	0.0378984
CST3	0.992961	0.994464	0.987465	0.884951	0.0379531
SUMO1	0.993275	0.994146	0.98746	0.885052	0.0380079
RAD54B	0.993343	0.994067	0.987449	0.885154	0.0380621
UQCRHL	0.994911	0.992478	0.987427	0.885255	0.0381168
PRM1	0.994324	0.99306	0.987424	0.885356	0.0381716
C19orf43	0.993547	0.993828	0.987415	0.885456	0.0382263
SNRPG	0.992648	0.994676	0.987364	0.885557	0.0382811
UBL5	0.995211	0.992108	0.987357	0.885657	0.0383342
BEX5	0.995498	0.991817	0.987352	0.885756	0.0383884
COX7B	0.993915	0.993378	0.987333	0.885856	0.038442
GFOD2	0.994692	0.992584	0.987316	0.885955	0.0384962
TMEM170B	0.994174	0.993087	0.987301	0.886053	0.0385509
MRPS36	0.99412	0.99314	0.987299	0.886152	0.0386057
KRTAP6-2	0.99337	0.993881	0.987292	0.88625	0.0386604
PSCA	0.995197	0.992055	0.987291	0.886348	0.0387152
SNURF	0.993888	0.993351	0.98728	0.886445	0.0387699
CKS2	0.993084	0.994146	0.987271	0.886542	0.0388247
SCGB1D2	0.993765	0.993457	0.987263	0.886639	0.0388794
HN1	0.994897	0.99232	0.987256	0.886736	0.0389889
CHIC1	0.993288	0.993908	0.987237	0.886832	0.0390436
SMCP	0.993942	0.993245	0.987229	0.886928	0.0390984
CHCHD8	0.995047	0.992134	0.987221	0.887024	0.0391531
PBOV1	0.993561	0.993616	0.987218	0.887119	0.0392079
C12orf61	0.995702	0.991474	0.987213	0.887215	0.0392626
DNAL1	0.99427	0.992901	0.987212	0.887309	0.0393173
CDC26	0.995088	0.992082	0.987209	0.887404	0.0393721
CDC42SE2	0.994106	0.99306	0.987207	0.887498	0.0394268
CLPS	0.995416	0.991738	0.987192	0.887592	0.039481
GRP	0.993316	0.993828	0.987185	0.887686	0.0395358
PDE6G	0.994106	0.993034	0.987181	0.88778	0.0395905
TIMM8B	0.995402	0.991738	0.987178	0.887873	0.0396447
RABL5	0.995047	0.992082	0.987168	0.887966	0.0396995
IER3IP1	0.99322	0.993855	0.987116	0.888059	0.0397542
LYRM2	0.994856	0.992214	0.98711	0.888151	0.0398089
CSAG1	0.992812	0.994226	0.987079	0.888243	0.0399184
CCL17	0.994011	0.993007	0.98706	0.888335	0.0399732
COX20	0.993847	0.993166	0.987055	0.888427	0.0400279
DCD	0.994174	0.992822	0.987038	0.888518	0.0400827
CKS1B	0.994038	0.992954	0.987034	0.888609	0.0401374
SNAPC5	0.994897	0.992082	0.987019	0.8887	0.0401921
C22orf15	0.992948	0.994014	0.987004	0.88879	0.0402469
C7orf66	0.994692	0.992267	0.987	0.888881	0.0403016
LCE1E	0.99487	0.992082	0.986992	0.888971	0.0403564
S100Z	0.994283	0.992663	0.986988	0.88906	0.0404111
CYB5A	0.994065	0.992875	0.986982	0.88915	0.0404659
LCE3E	0.994774	0.992161	0.986976	0.889239	0.0405206
C22orf39	0.992839	0.994093	0.986974	0.889328	0.0405754
C19orf42	0.993888	0.993034	0.986964	0.889417	0.0406301
C9orf80	0.993847	0.99306	0.98695	0.889505	0.0406848
SPINT4	0.993615	0.993272	0.98693	0.889593	0.0407396
SEC61B	0.99397	0.992901	0.986914	0.889681	0.0407943
DBI	0.993247	0.99359	0.98688	0.889769	0.0408491
C17orf58	0.99457	0.992267	0.986878	0.889856	0.0409033
LCE3D	0.994638	0.992187	0.986867	0.889943	0.040958
DPM2	0.993861	0.992954	0.986858	0.89003	0.0410128
VMA21	0.993452	0.993351	0.986847	0.890117	0.0410675
TFF1	0.995511	0.991289	0.986839	0.890204	0.0411222
TPGS1	0.9919	0.994889	0.98683	0.89029	0.041177
LCE1A	0.995074	0.991712	0.986827	0.890376	0.0412317
CXCL11	0.993139	0.993643	0.986825	0.890461	0.0413412
SUMO2	0.993139	0.993643	0.986825	0.890547	0.0413412
ENY2	0.993534	0.993245	0.986823	0.890632	0.041396
TMEM155	0.99427	0.992505	0.986817	0.890717	0.0414502
LOC286238	0.99416	0.99261	0.986814	0.890802	0.0415049
ISCA1	0.99273	0.99404	0.986813	0.890886	0.0415591
WFDC12	0.994488	0.992267	0.986797	0.890971	0.0416138
FXYD6	0.993479	0.993272	0.986795	0.891055	0.0416686
LCE2B	0.995306	0.991448	0.986794	0.891138	0.0417233
FXYD4	0.992825	0.993908	0.986777	0.891222	0.0417781
DYNLRB2	0.993534	0.993193	0.98677	0.891305	0.0418328
LCE2C	0.995306	0.991421	0.986768	0.891388	0.0418876
S100P	0.994747	0.991976	0.986765	0.891471	0.0419423
VMAC	0.994365	0.992346	0.986754	0.891554	0.041997
BET1	0.993615	0.993087	0.986746	0.891636	0.0420518
UBE2L6	0.994583	0.992108	0.986734	0.891718	0.0421065
C8orf40	0.994051	0.992637	0.986732	0.8918	0.0421613
SCOC	0.993547	0.99314	0.986731	0.891882	0.042216
LCE2D	0.995265	0.991395	0.986701	0.891963	0.0422697
KRTAP19-1	0.994597	0.992055	0.986695	0.892045	0.0423244
CCL19	0.994406	0.99224	0.98669	0.892126	0.0423792
GAGE2A	0.993493	0.99314	0.986677	0.892207	0.0424339
CCL20	0.994365	0.992267	0.986675	0.892287	0.0424881
AHSP	0.994147	0.992478	0.986669	0.892368	0.0425423
NDUFA4	0.993166	0.993457	0.986668	0.892448	0.042597
ANP32D	0.994706	0.991897	0.986645	0.892528	0.0426518
NOP10	0.993275	0.993325	0.986644	0.892607	0.0427065
C15orf56	0.993152	0.993431	0.986628	0.892687	0.0427613
SH3BGRL3	0.993043	0.993537	0.986625	0.892766	0.042816
SPINK13	0.993302	0.993272	0.986619	0.892845	0.0428708
OTOS	0.993615	0.992954	0.986615	0.892924	0.0429249
C18orf21	0.993956	0.99261	0.986611	0.893003	0.0429797
RPL36AL	0.994242	0.99232	0.986606	0.893081	0.0430344
UFM1	0.994024	0.992531	0.9866	0.893159	0.0430892
LOC653486	0.993724	0.992822	0.986591	0.893237	0.0431987
SCGB1C1	0.993724	0.992822	0.986591	0.893315	0.0431987
CCL26	0.992186	0.994358	0.986588	0.893393	0.0432534
C1orf159	0.99397	0.992558	0.986572	0.89347	0.0433082
CCL4L1	0.993779	0.992743	0.986567	0.893547	0.0434171
CCL4L2	0.993779	0.992743	0.986567	0.893624	0.0434171
PAGE2	0.993697	0.992822	0.986564	0.893701	0.0434718
PLAC9	0.994038	0.992478	0.986561	0.893777	0.043526
ARL9	0.99382	0.99269	0.986555	0.893854	0.0435808
DAP	0.993574	0.992928	0.986548	0.89393	0.0436355
LCE1B	0.994815	0.991685	0.986543	0.894006	0.0436897
SNN	0.996139	0.990366	0.986542	0.894081	0.0437445
TRAPPC2	0.994651	0.991844	0.986539	0.894157	0.0437992
DYNLL2	0.994351	0.992134	0.98653	0.894232	0.0438539
TXN	0.993302	0.993166	0.986514	0.894307	0.0439087
C8orf82	0.99288	0.993563	0.986489	0.894382	0.0439634
RPL38	0.991764	0.994676	0.986484	0.894457	0.0440182
PPP1R14A	0.993643	0.992796	0.986484	0.894531	0.0440724
POLR2J3	0.994515	0.991923	0.986482	0.894606	0.0441266
SMR3A	0.994406	0.992029	0.986479	0.89468	0.0441813
DYNLL1	0.994201	0.992214	0.98646	0.894754	0.0442361
C5orf64	0.994938	0.991474	0.986455	0.894828	0.0442903
KRTAP5-6	0.994556	0.991844	0.986444	0.894901	0.044345
HCRT	0.995416	0.990972	0.986429	0.894974	0.0443997
PATE2	0.993615	0.992743	0.986404	0.895048	0.0444545
DEFB126	0.994911	0.991448	0.986402	0.895121	0.0445092
MUSTN1	0.99442	0.991923	0.986388	0.895193	0.044564
TUSC2	0.994229	0.992108	0.986382	0.895266	0.0446187
STH	0.994147	0.992187	0.98638	0.895338	0.0446735
COX6B2	0.994856	0.991474	0.986374	0.895411	0.0447282
IFT20	0.992934	0.993378	0.986359	0.895483	0.0447829
PTH	0.993833	0.992478	0.986358	0.895554	0.0448377
MAGEA10-MAGEA5	0.993806	0.992505	0.986357	0.895626	0.0449472
MAGEA5	0.993806	0.992505	0.986357	0.895697	0.0449472
KRTAP12-3	0.995525	0.990788	0.986354	0.895769	0.0450008
CNIH	0.991737	0.99457	0.986352	0.89584	0.0450556
NRGN	0.995511	0.990788	0.98634	0.895911	0.0451103
PCBD2	0.992254	0.99404	0.98634	0.895981	0.0451651
DEFA5	0.994501	0.991791	0.986337	0.896052	0.0452198
LCE1C	0.994842	0.991448	0.986334	0.896122	0.045274
C20orf144	0.995047	0.991236	0.986327	0.896193	0.0453287
PCBD1	0.994515	0.991765	0.986325	0.896263	0.0453835
TCEB1	0.994542	0.991712	0.986299	0.896332	0.0454382
TIAF1	0.995006	0.991236	0.986286	0.896402	0.045493
PFN2	0.994297	0.991923	0.986266	0.896471	0.0455477
PAGE2B	0.993711	0.992505	0.986262	0.896541	0.0456025
PRR15L	0.995675	0.990524	0.98624	0.89661	0.0456572
C14orf180	0.992866	0.993325	0.986239	0.896679	0.0457119
S100A14	0.994692	0.9915	0.986238	0.896748	0.0457667
ACYP2	0.993929	0.99224	0.986216	0.896816	0.0458214
DNAJC19	0.992145	0.994014	0.986205	0.896885	0.0458756
S100A16	0.995211	0.990946	0.9862	0.896953	0.0459304
C1QTNF9B-AS1	0.994379	0.991765	0.986189	0.897021	0.0459851
IFI27L1	0.994324	0.991817	0.986188	0.897089	0.0460399
SPANXA1	0.994556	0.99158	0.986181	0.897156	0.0461493
SPANXA2	0.994556	0.99158	0.986181	0.897224	0.0461493
C4orf36	0.994051	0.992082	0.98618	0.897291	0.0462041
NAA38	0.992349	0.993775	0.986172	0.897359	0.0462588
BOLA3	0.992893	0.993219	0.986161	0.897426	0.046313
RPS28	0.995115	0.990999	0.986158	0.897493	0.0463678
RETNLB	0.994283	0.991817	0.986147	0.897559	0.0464225
MTPN	0.993697	0.992399	0.986144	0.897626	0.0464767
PRLH	0.995416	0.990682	0.98614	0.897692	0.0465309
CARD16	0.993683	0.992399	0.98613	0.897758	0.0465856
GABARAPL1	0.994051	0.992002	0.986101	0.897824	0.0466404
S100A3	0.994679	0.991368	0.986093	0.89789	0.0466951
APOC2	0.992635	0.993404	0.986088	0.897956	0.0467493
RPS29	0.994283	0.991738	0.986069	0.898022	0.0468035
C1orf182	0.99367	0.992346	0.986064	0.898087	0.0468583
HSPE1	0.993002	0.993007	0.986059	0.898152	0.046913
YBEY	0.993888	0.992108	0.986044	0.898217	0.0469678
CSTA	0.992689	0.993298	0.986037	0.898282	0.047022
BAALC	0.991914	0.994067	0.986028	0.898347	0.0470767
HES5	0.993016	0.992954	0.986019	0.898411	0.0471314
COMMD6	0.993411	0.992558	0.986017	0.898476	0.0471862
C6orf108	0.994024	0.991923	0.985995	0.89854	0.0472409
FCER1G	0.991669	0.994279	0.985995	0.898604	0.0472946
KCNE3	0.996098	0.989838	0.985977	0.898668	0.0473493
C10orf32	0.992648	0.993272	0.98597	0.898732	0.0474041
KRTAP15-1	0.993915	0.992002	0.985966	0.898796	0.0474588
LCE1D	0.994992	0.99092	0.985958	0.898859	0.0475135
ID4	0.994911	0.990999	0.985955	0.898923	0.0475683
SERF2	0.993288	0.99261	0.985948	0.898986	0.0476225
TMEM14E	0.994147	0.991738	0.985933	0.899049	0.0476772
TP53AIP1	0.994433	0.991448	0.985928	0.899112	0.047732
ATP5J	0.993397	0.992478	0.985925	0.899174	0.0477862
BRP44	0.992444	0.993431	0.985925	0.899237	0.0478409
PPBP	0.99416	0.991712	0.985921	0.899299	0.0478957
NDUFA3	0.994952	0.99092	0.985917	0.899362	0.0479499
FEZ1	0.99442	0.991448	0.985915	0.899424	0.0480041
TIMM8A	0.99412	0.991738	0.985906	0.899486	0.0480582
NHLRC4	0.99517	0.990682	0.985897	0.899547	0.048113
C20orf197	0.993656	0.992187	0.985893	0.899609	0.0481672
ZNF559-ZNF177	0.992186	0.993643	0.985878	0.899671	0.0482219
NARR	0.993425	0.992399	0.985873	0.899732	0.0482767
DYNLT3	0.993288	0.992531	0.98587	0.899793	0.0483314
SKA2	0.993888	0.991923	0.98586	0.899854	0.0483856
PVALB	0.994515	0.991289	0.985852	0.899915	0.0484404
DPY30	0.992662	0.99314	0.985852	0.899976	0.0484951
C2orf15	0.992961	0.992822	0.985834	0.900037	0.0485498
SPANXC	0.994597	0.991184	0.985828	0.900097	0.0486046
SRXN1	0.993452	0.99232	0.985822	0.900158	0.0486593
HES2	0.992444	0.993325	0.98582	0.900218	0.0487141
CCL27	0.993125	0.992637	0.985812	0.900278	0.0487688
ANAPC16	0.994011	0.991738	0.985798	0.900338	0.0488236
BANF1	0.993452	0.992293	0.985795	0.900398	0.0488783
COX6B1	0.994324	0.991421	0.985794	0.900457	0.048933
DMRT2	0.991941	0.993802	0.985792	0.900517	0.0489878
MUCL1	0.992458	0.993272	0.985781	0.900576	0.0490425
TFF3	0.99382	0.991897	0.985766	0.900635	0.0490973
C19orf48	0.994542	0.991157	0.985748	0.900694	0.049152
CCL15	0.993847	0.991844	0.985741	0.900753	0.0492068
PIN4	0.993738	0.991949	0.985738	0.900812	0.0492615
C10orf53	0.993179	0.992505	0.985735	0.900871	0.0493163
PF4V1	0.995033	0.990629	0.985709	0.900929	0.049371
SPANXD	0.994447	0.99121	0.985706	0.900988	0.0494805
SPANXE	0.994447	0.99121	0.985706	0.901046	0.0494805
GYPC	0.994979	0.990656	0.985682	0.901104	0.0495352
MCCD1	0.992989	0.992637	0.985677	0.901162	0.0495894
GNRH1	0.993356	0.992267	0.985674	0.90122	0.0496442
LOC401052	0.994256	0.991368	0.985674	0.901278	0.0496989
FABP5	0.992526	0.993087	0.985664	0.901335	0.0497537
TMEM141	0.993452	0.992161	0.985664	0.901393	0.0498084
HIGD1A	0.993602	0.992002	0.985655	0.90145	0.0498631
C19orf70	0.993288	0.992293	0.985633	0.901507	0.0499179
TMEM211	0.994351	0.99121	0.985611	0.901564	0.0499721
PNRC2	0.993261	0.992293	0.985606	0.901621	0.0500257
LCE2A	0.994106	0.991448	0.985604	0.901678	0.0500805
CT62	0.994788	0.990761	0.985597	0.901735	0.0501352
TMEM213	0.995457	0.990076	0.985577	0.901791	0.05019
KRTAP17-1	0.994515	0.990999	0.985563	0.901847	0.0502447
HINT3	0.992172	0.993325	0.985549	0.901904	0.0502994
BGLAP	0.994365	0.991131	0.985546	0.90196	0.0503542
PATE1	0.992635	0.992848	0.985536	0.902016	0.0504089
EIF1B	0.993425	0.992055	0.985532	0.902072	0.0504637
BRI3	0.992621	0.992848	0.985522	0.902128	0.0505184
PDCD5	0.99209	0.993378	0.985521	0.902183	0.0505726
TEX12	0.992295	0.993166	0.985513	0.902239	0.0506274
ATP5J2	0.994147	0.991316	0.985513	0.902294	0.0506821
TMEM133	0.994542	0.99092	0.985511	0.902349	0.0507368
GLRX	0.993711	0.991738	0.985501	0.902404	0.0507905
HCST	0.994801	0.990629	0.98548	0.902459	0.0508452
FAM195A	0.993738	0.991685	0.985475	0.902514	0.0509
XAGE2B	0.992376	0.993034	0.985463	0.902569	0.0510089
XAGE2	0.992376	0.993034	0.985463	0.902624	0.0510089
CXCL12	0.993752	0.991659	0.985463	0.902678	0.0510631
TMEM14A	0.993247	0.992161	0.985461	0.902732	0.0511179
SUMO3	0.994297	0.991104	0.985452	0.902787	0.0511726
ATP5G3	0.992839	0.992558	0.98545	0.902841	0.0512273
MSMB	0.993288	0.992108	0.985449	0.902895	0.0512821
CCL5	0.994188	0.99121	0.985449	0.902949	0.0513368
TSPO	0.991356	0.99404	0.985448	0.903003	0.0513916
LSM2	0.992281	0.993113	0.985447	0.903056	0.0514463
TMEM216	0.992199	0.993193	0.985445	0.90311	0.0515005
SF3B5	0.994897	0.990497	0.985443	0.903163	0.0515553
COX5B	0.992471	0.992901	0.985426	0.903216	0.0516095
CCDC85B	0.993683	0.991685	0.985421	0.90327	0.0516637
FAM110D	0.991451	0.993908	0.985411	0.903323	0.0517184
MRPL34	0.995252	0.990102	0.985401	0.903376	0.0517731
PSPN	0.992948	0.992399	0.9854	0.903428	0.0518279
C1orf130	0.99442	0.99092	0.98539	0.903481	0.0518826
C14orf177	0.994147	0.991157	0.985356	0.903534	0.0519374
C4orf46	0.993506	0.991791	0.985351	0.903586	0.0519921
ARPP19	0.994297	0.990999	0.985347	0.903638	0.0520469
CARD17	0.993343	0.991949	0.985346	0.903691	0.0521016
CXCL13	0.99273	0.992558	0.985342	0.903743	0.0521563
ASIP	0.993465	0.991817	0.985336	0.903795	0.0522111
DSCR4	0.994079	0.991184	0.985314	0.903847	0.0522658
C6orf195	0.994706	0.99055	0.985306	0.903898	0.0523206
IFI27	0.994638	0.990603	0.985291	0.90395	0.0523753
TMEM14C	0.993261	0.991976	0.985291	0.904002	0.0524301
CXorf61	0.993997	0.991236	0.985286	0.904053	0.0524843
KRTAP12-1	0.99547	0.989759	0.985276	0.904104	0.052539
C1orf115	0.994515	0.990709	0.985274	0.904156	0.0525932
LSM6	0.991438	0.993775	0.985266	0.904207	0.0526479
TCEAL8	0.994583	0.990629	0.985263	0.904258	0.0527027
C7orf34	0.993806	0.991395	0.985254	0.904308	0.0527574
WFDC2	0.99457	0.990629	0.98525	0.904359	0.0528116
RNF166	0.993506	0.991685	0.985246	0.90441	0.0528664
C19orf25	0.994774	0.990418	0.985243	0.90446	0.0529211
SNX20	0.994079	0.991104	0.985236	0.904511	0.0529753
TMEM196	0.99239	0.992769	0.985214	0.904561	0.0530301
NPFF	0.993547	0.991606	0.985207	0.904611	0.0530848
MIEN1	0.99303	0.992108	0.985193	0.904661	0.053139
TSHB	0.994256	0.990867	0.985175	0.904711	0.0531937
PAIP2B	0.992635	0.992478	0.985168	0.904761	0.0532485
BET1L	0.99427	0.99084	0.985162	0.904811	0.0533032
RIPPLY2	0.99307	0.992029	0.985154	0.904861	0.053358
RPRML	0.995975	0.989127	0.985147	0.90491	0.0534122
CDK2AP2	0.994433	0.990656	0.985141	0.90496	0.0534669
C1orf189	0.992145	0.992928	0.985128	0.905009	0.0535217
OCM2	0.993942	0.991131	0.985127	0.905058	0.0535764
DEXI	0.996194	0.98889	0.985127	0.905108	0.0536311
DEFA4	0.994392	0.990682	0.985127	0.905157	0.0536859
COX7A1	0.99307	0.991976	0.985102	0.905206	0.0537406
C14orf182	0.993043	0.992002	0.985101	0.905254	0.0537954
CCDC167	0.994379	0.990656	0.985087	0.905303	0.0538501
VAMP8	0.99416	0.990867	0.985081	0.905352	0.0539049
HMGN1	0.993384	0.991632	0.985071	0.9054	0.0539591
C1orf53	0.993302	0.991712	0.985069	0.905449	0.0540138
TP53TG3B	0.994433	0.990577	0.985062	0.905497	0.0541227
TP53TG3C	0.994433	0.990577	0.985062	0.905545	0.0541227
CCL24	0.993002	0.992002	0.985061	0.905593	0.0541775
S100A9	0.993792	0.99121	0.985057	0.905641	0.0542322
LYSMD2	0.991805	0.993193	0.985053	0.905689	0.0542864
CLLU1	0.993125	0.99187	0.985051	0.905737	0.0543412
ATP5L	0.993343	0.991632	0.985031	0.905785	0.0544506
ACOT13	0.993356	0.991606	0.985018	0.905832	0.0545048
BBC3	0.992716	0.99224	0.985013	0.90588	0.0545596
C4orf3	0.991152	0.993802	0.985009	0.905927	0.0546143
XCL1	0.993384	0.991553	0.984993	0.905974	0.0546691
NRG4	0.993247	0.991685	0.984989	0.906022	0.0547238
C18orf62	0.992676	0.992214	0.984946	0.906069	0.0547786
RNASEK	0.994897	0.989997	0.984945	0.906116	0.0548333
LEPROTL1	0.993247	0.991632	0.984936	0.906163	0.054888
NDUFA4L2	0.994011	0.990867	0.984932	0.906209	0.0549428
XAGE3	0.992104	0.992769	0.98493	0.906256	0.0549975
GFRA4	0.990432	0.994438	0.984923	0.906303	0.0550523
HAMP	0.991587	0.993272	0.984916	0.906349	0.055107
XCL2	0.993411	0.991448	0.984915	0.906396	0.0551618
CXCL17	0.992158	0.99269	0.984906	0.906442	0.0552165
RPP14	0.992499	0.992346	0.984902	0.906488	0.0552707
NDUFA5	0.992199	0.992637	0.984894	0.906534	0.0553255
TBCA	0.993833	0.990999	0.984888	0.90658	0.0553796
IGFL2	0.994706	0.990128	0.984887	0.906626	0.0554344
FXYD3	0.991451	0.993378	0.984886	0.906672	0.0554891
CTXN1	0.996823	0.987996	0.984857	0.906718	0.0555439
UCN	0.995074	0.989707	0.984832	0.906763	0.0555975
LCE1F	0.994665	0.990102	0.98482	0.906809	0.0556523
RPL22L1	0.993915	0.99084	0.984811	0.906854	0.055707
LBH	0.99431	0.990445	0.98481	0.9069	0.0557618
RBP1	0.99397	0.990761	0.984787	0.906945	0.0558165
FLJ44635	0.99446	0.99026	0.984775	0.90699	0.0558712
NDUFA2	0.994801	0.989918	0.984771	0.907035	0.055926
SUB1	0.992539	0.992161	0.984759	0.90708	0.0559807
TMEM47	0.991982	0.992716	0.984756	0.907125	0.0560355
RAB42	0.992716	0.991976	0.984751	0.90717	0.0560902
RPL30	0.99337	0.991316	0.984743	0.907215	0.056145
HDDC3	0.99367	0.990999	0.984726	0.907259	0.0562544
EIF1	0.99367	0.990999	0.984726	0.907304	0.0562544
TMEM60	0.992989	0.991659	0.984706	0.907348	0.0563092
C20orf24	0.990609	0.99404	0.984705	0.907393	0.0563639
SPANXN3	0.993084	0.991553	0.984696	0.907437	0.0564187
DEFB118	0.992621	0.992002	0.984682	0.907481	0.0564734
SLC31A2	0.994406	0.990207	0.984668	0.907525	0.0565282
CSAG3	0.991832	0.992769	0.98466	0.907569	0.0565829
CRH	0.993833	0.990761	0.984652	0.907613	0.0566371
FAM89A	0.991954	0.992637	0.984651	0.907657	0.0566913
OSTN	0.992812	0.991765	0.984635	0.907701	0.056746
KIAA0101	0.992648	0.991923	0.984631	0.907744	0.0568002
PLAC4	0.993997	0.990577	0.98463	0.907788	0.0568544
FAM174B	0.994147	0.990418	0.984621	0.907831	0.0569092
TXNDC8	0.99273	0.991817	0.984607	0.907875	0.0569639
CGA	0.993356	0.991184	0.984599	0.907918	0.0570187
AHSA2	0.992254	0.992267	0.98458	0.907961	0.0571282
LY6K	0.992254	0.992267	0.98458	0.908004	0.0571282
SPC24	0.992186	0.99232	0.984565	0.908047	0.0571829
SPCS2	0.992839	0.991659	0.984558	0.90809	0.0572376
CSAG2	0.99175	0.992743	0.984553	0.908133	0.0572924
HBG1	0.993247	0.991236	0.984543	0.908176	0.0573471
IGFL1	0.99412	0.990366	0.984542	0.908219	0.0574019
DNAL4	0.993643	0.99084	0.984541	0.908261	0.0574566
EPGN	0.992975	0.9915	0.984535	0.908304	0.0575114
SPANXB1	0.994256	0.990207	0.98452	0.908346	0.0576192
SPANXB2	0.994256	0.990207	0.98452	0.908388	0.0576192
ATPIF1	0.993847	0.990603	0.984508	0.908431	0.0576739
PIRT	0.994692	0.989759	0.984506	0.908473	0.0577276
CXCL1	0.995088	0.989364	0.984505	0.908515	0.0577812
SCXB	0.993711	0.990735	0.984504	0.908557	0.0578907
SCXA	0.993711	0.990735	0.984504	0.908599	0.0578907
HBG2	0.99322	0.99121	0.98449	0.908641	0.0579455
TMEM218	0.993711	0.990709	0.984478	0.908683	0.0580002
SLIRP	0.993574	0.99084	0.984474	0.908724	0.0580544
CCL16	0.99288	0.991527	0.984467	0.908766	0.0581086
LY6D	0.994679	0.989733	0.984466	0.908807	0.0581628
C14orf142	0.995498	0.988917	0.984464	0.908849	0.0582176
TMEM244	0.991818	0.992584	0.984463	0.90889	0.0582723
RIPPLY1	0.993724	0.990656	0.984439	0.908931	0.058327
HM13	0.994624	0.989759	0.984439	0.908973	0.0583812
CENPW	0.992322	0.992029	0.984412	0.909014	0.058436
IGFL4	0.992662	0.991685	0.984408	0.909055	0.0584907
SERF1B	0.991207	0.99314	0.984407	0.909096	0.0585997
SERF1A	0.991207	0.99314	0.984407	0.909137	0.0585997
ERH	0.992077	0.992267	0.984405	0.909177	0.0586539
C22orf24	0.992921	0.991421	0.984403	0.909218	0.0587081
C10orf128	0.992363	0.991976	0.9844	0.909259	0.0587628
TCF15	0.994433	0.989891	0.984381	0.909299	0.0588175
SLPI	0.992934	0.991368	0.984364	0.90934	0.0588723
URM1	0.991954	0.992346	0.984362	0.90938	0.058927
C19orf60	0.992798	0.9915	0.98436	0.90942	0.0589812
SNRPE	0.991723	0.992558	0.984342	0.909461	0.059036
C1orf21	0.992403	0.99187	0.984335	0.909501	0.0590907
CHTF8	0.994215	0.990049	0.984322	0.909541	0.0591455
CALCA	0.994188	0.990076	0.984321	0.909581	0.0592002
FABP7	0.993098	0.991157	0.984316	0.909621	0.0592549
C17orf61	0.993411	0.99084	0.984312	0.909661	0.0593097
FAM26D	0.993275	0.990972	0.984308	0.9097	0.0593644
ELOF1	0.993602	0.990629	0.984291	0.90974	0.0594186
C11orf67	0.992145	0.992082	0.984289	0.90978	0.0594734
PI3	0.994842	0.989391	0.984288	0.909819	0.0595281
CCL22	0.994788	0.989443	0.984286	0.909859	0.0595829
CXCL14	0.992608	0.991606	0.984276	0.909898	0.0596376
HIGD1B	0.993452	0.990761	0.984274	0.909938	0.0596923
IFITM5	0.993738	0.990471	0.984269	0.909977	0.0597471
MPLKIP	0.992363	0.991844	0.984269	0.910016	0.0598018
C11orf83	0.995429	0.988785	0.984266	0.910055	0.0598566
NDUFC2-KCTD14	0.994952	0.989259	0.984265	0.910094	0.0599113
RWDD1	0.99205	0.992134	0.984247	0.910133	0.0599661
SH3BGRL	0.992403	0.991765	0.98423	0.910172	0.0600203
SPATA8	0.991818	0.992346	0.984227	0.910211	0.060075
PAGE4	0.992594	0.991553	0.98421	0.910249	0.0601297
ROMO1	0.994147	0.989997	0.984202	0.910288	0.0601845
CTNNBIP1	0.992948	0.991184	0.984194	0.910327	0.0602387
CHRAC1	0.993656	0.990471	0.984188	0.910365	0.0602934
TMEM100	0.994979	0.989154	0.984187	0.910403	0.0603482
LLPH	0.992676	0.991448	0.984186	0.910442	0.0604029
GAST	0.992539	0.99158	0.984182	0.91048	0.0604577
C15orf40	0.99288	0.991236	0.984179	0.910518	0.0605119
FSHB	0.992893	0.99121	0.984166	0.910556	0.0605666
PTMA	0.993207	0.990893	0.984162	0.910595	0.0606213
RPS25	0.992539	0.991553	0.984156	0.910633	0.0606761
CCL3L1	0.992022	0.992055	0.984141	0.91067	0.060785
CCL3L3	0.992022	0.992055	0.984141	0.910708	0.060785
PFDN4	0.992281	0.991791	0.984135	0.910746	0.0608392
HBD	0.993438	0.990629	0.984129	0.910784	0.060894
RPLP2	0.994229	0.989838	0.984126	0.910821	0.0609482
LCE5A	0.992295	0.991765	0.984123	0.910859	0.0610029
C1D	0.99224	0.991817	0.984121	0.910896	0.0610571
CISD1	0.991995	0.992055	0.984114	0.910934	0.0611118
LYPD2	0.99427	0.989786	0.984114	0.910971	0.0611666
C16orf13	0.991968	0.992082	0.984113	0.911009	0.0612213
TMEM14B	0.993247	0.990788	0.984097	0.911046	0.0612761
MAFK	0.994829	0.989206	0.984091	0.911083	0.0613308
HCFC1R1	0.992703	0.991316	0.984082	0.91112	0.0613856
C1orf210	0.993997	0.990023	0.98408	0.911157	0.0614403
CD59	0.993493	0.990524	0.984078	0.911194	0.061495
TXNRD3NB	0.992526	0.991474	0.984064	0.911231	0.0615498
TMEM230	0.994529	0.98947	0.984056	0.911268	0.061604
APITD1-CORT	0.993016	0.990972	0.984051	0.911304	0.0616576
GUCA2B	0.993888	0.990102	0.98405	0.911341	0.0617118
TAC4	0.991682	0.992293	0.98404	0.911378	0.0617666
GOLT1B	0.992757	0.99121	0.984031	0.911414	0.0618213
CCL3	0.992199	0.991765	0.984028	0.911451	0.0618761
TPD52L3	0.99412	0.989838	0.984018	0.911487	0.0619308
VCY	0.994992	0.988917	0.983965	0.911523	0.0620403
VCY1B	0.994992	0.988917	0.983965	0.91156	0.0620403
DEFB112	0.992267	0.991632	0.983964	0.911596	0.062095
SAMD13	0.99224	0.991659	0.983964	0.911632	0.0621492
IL18	0.993084	0.990788	0.983935	0.911668	0.062204
PSENEN	0.99156	0.992293	0.983918	0.911704	0.0622587
C19orf53	0.995184	0.98868	0.983918	0.91174	0.0623129
HBB	0.993724	0.990128	0.983915	0.911776	0.0623677
KRTAP5-11	0.993425	0.990418	0.983906	0.911812	0.0624224
LEPROT	0.993234	0.990603	0.9839	0.911847	0.0624771
LALBA	0.992254	0.99158	0.983899	0.911883	0.0625319
GCSH	0.991438	0.992372	0.983875	0.911919	0.0625866
FABP9	0.99307	0.990735	0.98387	0.911954	0.0626414
C8orf4	0.993166	0.990629	0.983859	0.91199	0.0626961
TMEM128	0.992104	0.991685	0.983855	0.912025	0.0627509
APOC4	0.993234	0.99055	0.983848	0.91206	0.0628056
OCM	0.992757	0.991025	0.983847	0.912096	0.0628603
C20orf201	0.991968	0.991791	0.983825	0.912131	0.0629151
RPL36	0.994665	0.989101	0.983824	0.912166	0.0629693
DSTN	0.993207	0.99055	0.983821	0.912201	0.063024
MCFD2	0.993179	0.990577	0.98382	0.912236	0.0630788
NNAT	0.993057	0.990682	0.983804	0.912271	0.0631335
GAGE2C	0.993752	0.98997	0.983784	0.912306	0.0631883
OLIG1	0.992349	0.991368	0.983783	0.912341	0.063243
CDK2AP1	0.993792	0.989918	0.983773	0.912376	0.0632978
KCNE2	0.993247	0.990445	0.983757	0.91241	0.0633514
SNTN	0.992635	0.991052	0.983752	0.912445	0.0634056
FABP1	0.993452	0.990234	0.98375	0.91248	0.0634603
CCL28	0.993792	0.989891	0.983746	0.912514	0.0635151
C17orf67	0.992866	0.990814	0.983746	0.912549	0.0635698
HHLA3	0.994651	0.989022	0.983732	0.912583	0.063624
PSMG3	0.994883	0.988785	0.983726	0.912617	0.0636782
INS	0.992866	0.990788	0.98372	0.912652	0.063733
GAGE5	0.993234	0.990418	0.983717	0.912686	0.0639514
GAGE12I	0.993234	0.990418	0.983717	0.91272	0.0639514
GAGE7	0.993234	0.990418	0.983717	0.912754	0.0639514
GAGE4	0.993234	0.990418	0.983717	0.912788	0.0639514
MRPS33	0.992281	0.991368	0.983716	0.912822	0.0640056
UBE2W	0.991193	0.992452	0.983711	0.912856	0.0640603
LY6G6C	0.993643	0.989997	0.983703	0.91289	0.0641151
APOC3	0.99175	0.99187	0.983688	0.912924	0.0641693
ARPC5L	0.991982	0.991632	0.983681	0.912957	0.064224
CCL14	0.991343	0.992267	0.983676	0.912991	0.0642788
ATP5D	0.993602	0.989997	0.983662	0.913025	0.0643335
UQCRH	0.991533	0.992029	0.983629	0.913058	0.0643882
BEX1	0.993084	0.990471	0.983621	0.913092	0.064443
IFI27L2	0.993901	0.989654	0.983619	0.913125	0.0644977
IL2	0.99209	0.991448	0.983606	0.913159	0.0645519
TXNL4B	0.992213	0.991316	0.983596	0.913192	0.0646067
PTH2	0.99618	0.987366	0.983594	0.913225	0.0646614
CREG1	0.990106	0.993404	0.983576	0.913258	0.0647162
MRPS21	0.993615	0.989891	0.983571	0.913292	0.0647709
DUSP23	0.989387	0.99412	0.983569	0.913325	0.0648256
MS4A6E	0.992975	0.990524	0.983566	0.913358	0.0649351
RNASE12	0.992975	0.990524	0.983566	0.913391	0.0649351
NKX6-3	0.99427	0.989233	0.983564	0.913424	0.0649899
MXRA7	0.991302	0.992187	0.983557	0.913456	0.0650446
SNCA	0.991954	0.991527	0.983549	0.913489	0.0650994
SLURP1	0.993534	0.989944	0.983542	0.913522	0.0651541
SH3BGRL2	0.99258	0.990893	0.983541	0.913555	0.0652088
HBE1	0.993288	0.990181	0.983535	0.913587	0.065263
PAIP2	0.992186	0.991263	0.983517	0.91362	0.0653178
DAD1	0.993929	0.989522	0.983515	0.913652	0.0653725
UQCRB	0.990459	0.992981	0.983507	0.913685	0.0654267
C2orf76	0.992703	0.990735	0.983505	0.913717	0.0654815
CCDC53	0.992757	0.990656	0.983481	0.91375	0.0655362
NHP2L1	0.993615	0.989786	0.983466	0.913782	0.065591
IL21	0.992281	0.991104	0.983454	0.913814	0.0656457
CAMK2N2	0.993179	0.990207	0.983454	0.913846	0.0657004
INSL5	0.993329	0.990049	0.983445	0.913878	0.0657552
DYNLRB1	0.992499	0.990867	0.983434	0.91391	0.0658094
COX7A2L	0.992281	0.991078	0.983428	0.913943	0.0658641
GAGE10	0.991737	0.991606	0.983412	0.913974	0.0659189
H2AFV	0.993534	0.989812	0.983412	0.914006	0.0659736
FABP12	0.99273	0.990603	0.983401	0.914038	0.0660284
CXCL9	0.991805	0.991527	0.983401	0.91407	0.0660831
BIK	0.99303	0.990287	0.983384	0.914102	0.0661378
SNRPD2	0.994229	0.989075	0.983366	0.914133	0.0661926
SST	0.993561	0.989733	0.98336	0.914165	0.0662473
DENR	0.991886	0.991395	0.983351	0.914197	0.0663015
POLR1D	0.992703	0.990577	0.983348	0.914228	0.0663563
COX16	0.991778	0.9915	0.983348	0.91426	0.066411
C7orf59	0.99224	0.991025	0.983335	0.914291	0.0664658
PDF	0.99137	0.99187	0.98331	0.914322	0.0665205
CORT	0.993765	0.98947	0.9833	0.914354	0.0665747
VSX1	0.988899	0.994332	0.983294	0.914385	0.0666294
PSMC3IP	0.991818	0.991395	0.983284	0.914416	0.0666842
CRCT1	0.994911	0.988312	0.983282	0.914447	0.0667389
RPL37A	0.992839	0.990366	0.983274	0.914478	0.0667937
FABP3	0.993288	0.989918	0.983274	0.914509	0.0668484
PAGE5	0.99209	0.991104	0.983265	0.91454	0.0669032
RAX2	0.99367	0.989522	0.983258	0.914571	0.0669579
IFITM1	0.994379	0.988812	0.983253	0.914602	0.0670126
COX5A	0.992839	0.990339	0.983247	0.914633	0.0670674
MRPL36	0.993656	0.989522	0.983245	0.914664	0.0671216
RPL36A-HNRNPH2	0.992172	0.990999	0.983241	0.914695	0.0671758
RLN2	0.993043	0.990128	0.98324	0.914725	0.06723
MLANA	0.991669	0.991474	0.983214	0.914756	0.0672847
SPCS1	0.991465	0.991659	0.983195	0.914786	0.0673395
FDX1	0.991533	0.99158	0.983184	0.914817	0.0673942
PEA15	0.993738	0.989364	0.983169	0.914847	0.067449
CTSC	0.993234	0.989865	0.983167	0.914878	0.0675037
RNASE8	0.99322	0.989865	0.983154	0.914908	0.0675584
CDKN2AIPNL	0.993956	0.989127	0.983149	0.914939	0.0676132
GAGE2B	0.993425	0.989654	0.983147	0.914969	0.0676679
IL15	0.991112	0.991949	0.983133	0.914999	0.0677227
C14orf129	0.992716	0.990339	0.983126	0.915029	0.0677774
IL5	0.991764	0.991289	0.983125	0.915059	0.0678322
GHRH	0.992431	0.990603	0.983105	0.915089	0.0678869
CXorf27	0.993724	0.989312	0.983103	0.915119	0.0679416
RPS21	0.993247	0.989786	0.983102	0.915149	0.0679964
C22orf40	0.993888	0.989127	0.983082	0.915179	0.0680511
TCTA	0.993901	0.989101	0.983069	0.915209	0.0681059
CALM2	0.991805	0.991184	0.983061	0.915239	0.0681601
TSEN15	0.990799	0.992187	0.983058	0.915269	0.0682148
C7orf23	0.991614	0.991368	0.983055	0.915298	0.0682696
KRTAP9-4	0.992907	0.990076	0.983053	0.915328	0.0683243
ZNF69	0.991628	0.991342	0.983042	0.915358	0.068379
NDUFB1	0.99416	0.988812	0.983037	0.915387	0.0684338
LEMD1	0.990419	0.992531	0.983021	0.915417	0.0684885
NAT14	0.992662	0.990287	0.98302	0.915446	0.0685433
C20orf79	0.993506	0.989443	0.983018	0.915476	0.0685975
ENSA	0.992254	0.990682	0.983008	0.915505	0.0686517
RBP7	0.992458	0.990471	0.983001	0.915534	0.0687064
CST9L	0.992349	0.990577	0.982998	0.915564	0.0687612
C6orf57	0.99137	0.991553	0.982996	0.915593	0.0688159
DYNLT1	0.991343	0.99158	0.982995	0.915622	0.0688706
PMP2	0.991465	0.991448	0.982985	0.915651	0.0689254
LTC4S	0.992335	0.990577	0.982984	0.91568	0.0689801
POLD4	0.993465	0.989443	0.982978	0.915709	0.0690349
HMGA1	0.992989	0.989918	0.982977	0.915738	0.0690896
C6orf201	0.992744	0.990155	0.98297	0.915767	0.0691444
C22orf32	0.995784	0.987129	0.982968	0.915796	0.0691991
ISCA2	0.991628	0.991263	0.982964	0.915825	0.0692538
TNFAIP8L1	0.994297	0.988601	0.982963	0.915854	0.0693086
FAM72B	0.992471	0.990418	0.982962	0.915882	0.0693633
COTL1	0.99431	0.988575	0.98295	0.915911	0.0694181
GHRL	0.991764	0.991104	0.982942	0.91594	0.0694723
KRTAP9-3	0.992703	0.990155	0.982929	0.915968	0.069527
FGF16	0.992145	0.990709	0.982926	0.915997	0.0695818
LACRT	0.991982	0.990867	0.982922	0.916025	0.0696365
RNF7	0.99288	0.98997	0.982921	0.916054	0.0696907
CLPSL1	0.993247	0.989601	0.982919	0.916082	0.0697454
CST8	0.992744	0.990102	0.982917	0.916111	0.0698002
RPL22	0.993125	0.989707	0.982902	0.916139	0.0698549
SCAND1	0.993861	0.988969	0.982898	0.916167	0.0699091
HIST1H2BA	0.994992	0.987839	0.982892	0.916196	0.0699639
ATP5G1	0.99352	0.989285	0.982875	0.916224	0.0700186
MRPS17	0.992594	0.990207	0.982874	0.916252	0.0700734
GAGE12F	0.992376	0.990418	0.982868	0.91628	0.0701281
RETN	0.993288	0.989496	0.982855	0.916308	0.0701828
PHF5A	0.992063	0.990709	0.982846	0.916336	0.0702376
AIF1L	0.990921	0.991844	0.982839	0.916364	0.0702923
SPRR3	0.992662	0.990102	0.982837	0.916392	0.0703471
FIGLA	0.992471	0.990287	0.982831	0.91642	0.0704018
LYNX1	0.994242	0.988522	0.982831	0.916448	0.070456
C1orf150	0.990935	0.991817	0.982826	0.916475	0.0705108
CHCHD10	0.993465	0.989285	0.982821	0.916503	0.070565
C3orf27	0.993888	0.988864	0.98282	0.916531	0.0706191
C11orf31	0.994733	0.988023	0.982819	0.916558	0.0706739
RPA3	0.992036	0.990709	0.982819	0.916586	0.0707286
TUSC1	0.99156	0.991184	0.982818	0.916614	0.0707834
C6orf226	0.995579	0.987182	0.982818	0.916641	0.070837
CALCB	0.994092	0.988654	0.982813	0.916669	0.0708918
HINT1	0.993193	0.989549	0.982813	0.916696	0.0709465
NDUFS5	0.992785	0.989944	0.982801	0.916723	0.0710013
MZB1	0.99175	0.990972	0.982797	0.916751	0.071056
CCL21	0.992539	0.990181	0.982794	0.916778	0.0711107
OTOR	0.992907	0.989812	0.982791	0.916805	0.0711655
BATF3	0.991084	0.991632	0.982791	0.916833	0.0712202
LGALS2	0.993329	0.989391	0.982791	0.91686	0.0712744
C3orf52	0.992798	0.989918	0.982788	0.916887	0.0713292
UQCRQ	0.993452	0.989259	0.982781	0.916914	0.0713839
TP53INP1	0.99273	0.98997	0.982773	0.916941	0.0714387
NDUFC2	0.994938	0.98776	0.98276	0.916968	0.0714934
C2CD4B	0.990256	0.992425	0.982755	0.916995	0.0715481
NDUFB2	0.993915	0.988759	0.982742	0.917022	0.0716029
FABP4	0.991642	0.991025	0.982742	0.917049	0.0716576
RNASE6	0.993302	0.989364	0.982738	0.917076	0.0717124
LRRC26	0.990446	0.992214	0.982734	0.917102	0.0717671
HSPB11	0.991818	0.99084	0.982734	0.917129	0.0718219
CCDC126	0.992267	0.990392	0.982734	0.917156	0.0719308
HMSD	0.992267	0.990392	0.982734	0.917182	0.0719308
IGLL5	0.992431	0.990207	0.982712	0.917209	0.0719839
ID2	0.99457	0.988075	0.982709	0.917236	0.0720386
KRTAP4-1	0.99446	0.98818	0.982706	0.917262	0.0720934
URGCP-MRPS24	0.991682	0.990946	0.982704	0.917289	0.0721481
LOC100509575	0.993425	0.989206	0.982702	0.917315	0.0722029
FLYWCH2	0.994392	0.988233	0.982691	0.917341	0.0722576
UBE2D2	0.9905	0.992108	0.982683	0.917368	0.0723671
KRTDAP	0.9905	0.992108	0.982683	0.917394	0.0723671
CXCL5	0.993847	0.988759	0.982675	0.91742	0.0724219
C3orf14	0.990989	0.991606	0.982671	0.917447	0.0724766
PROK1	0.992934	0.989654	0.982661	0.917473	0.0725313
NGFRAP1	0.991954	0.990629	0.982659	0.917499	0.0725861
G0S2	0.994515	0.988075	0.982656	0.917525	0.0726408
NENF	0.991315	0.991263	0.982654	0.917551	0.0726956
FAM72A	0.992471	0.990102	0.982648	0.917577	0.0727498
POMP	0.991383	0.991184	0.982643	0.917603	0.072804
WDR83OS	0.993806	0.988759	0.982635	0.917629	0.0728587
GLOD5	0.993247	0.989312	0.982631	0.917655	0.0729135
CNRIP1	0.993002	0.989549	0.982624	0.917681	0.0729682
PLAC8	0.992948	0.989601	0.982623	0.917707	0.0730229
LCNL1	0.99065	0.991897	0.982622	0.917733	0.0730771
RARRES2	0.992335	0.990207	0.982618	0.917758	0.0731319
DDA1	0.991479	0.991052	0.982606	0.917784	0.0731866
MED19	0.992417	0.990102	0.982594	0.91781	0.0732414
RABGAP1L	0.986638	0.995897	0.98259	0.917835	0.0732956
IL9	0.992349	0.990128	0.982553	0.917861	0.0733503
KRTAP4-2	0.993711	0.988759	0.98254	0.917887	0.073405
GAGE12G	0.991397	0.991052	0.982525	0.917912	0.0734598
ISCU	0.992267	0.990181	0.982524	0.917938	0.0735145
GAGE12H	0.991383	0.991052	0.982512	0.917963	0.0736788
GAGE12B	0.991383	0.991052	0.982512	0.917988	0.0736788
GAGE12E	0.991383	0.991052	0.982512	0.918014	0.0736788
LOC200726	0.992403	0.990023	0.982502	0.918039	0.0737335
PTS	0.990555	0.99187	0.982502	0.918064	0.0737877
C1orf95	0.993724	0.988706	0.982501	0.91809	0.0738424
PPIL3	0.99065	0.991765	0.982491	0.918115	0.0738972
TMEM105	0.992921	0.989443	0.982439	0.91814	0.0739519
RNPC3	0.98611	0.996269	0.982432	0.918165	0.0740067
C7orf65	0.992199	0.990155	0.982431	0.91819	0.0740609
VAMP5	0.994229	0.988128	0.982425	0.918215	0.0741156
GABARAPL2	0.9919	0.990445	0.982422	0.91824	0.0741704
HIST1H4G	0.995907	0.986447	0.98241	0.918265	0.0742251
MSRB1	0.99288	0.989443	0.982398	0.91829	0.0742798
UBE2C	0.991669	0.990629	0.982376	0.918315	0.0743346
GAGE12J	0.991397	0.990893	0.982369	0.91834	0.0743893
KRTAP13-3	0.992608	0.98968	0.982364	0.918365	0.0744441
CST11	0.99103	0.991236	0.982345	0.91839	0.0744988
VAMP3	0.990976	0.991289	0.982343	0.918414	0.0745536
C11orf51	0.991179	0.991078	0.982336	0.918439	0.0746072
IFT43	0.989754	0.992505	0.982335	0.918464	0.0746614
TAC3	0.991438	0.990814	0.98233	0.918488	0.0747162
SH2D1A	0.991886	0.990366	0.98233	0.918513	0.0747709
INSL4	0.992594	0.989654	0.982325	0.918538	0.0748256
SNRPD1	0.991778	0.990445	0.982301	0.918562	0.0748804
C7orf53	0.99122	0.990999	0.982298	0.918587	0.0749351
CPLX4	0.99209	0.990128	0.982297	0.918611	0.0749899
DHRS4L2	0.990745	0.991448	0.982271	0.918635	0.0750446
FBXO48	0.991642	0.99055	0.982271	0.91866	0.0750994
C9orf170	0.992825	0.989364	0.982266	0.918684	0.0751541
SAA4	0.993084	0.989101	0.98226	0.918708	0.0752088
TTC36	0.989767	0.992399	0.982244	0.918733	0.075263
LAMTOR3	0.990079	0.992082	0.982239	0.918757	0.0753178
C1orf162	0.991139	0.990999	0.982217	0.918781	0.0753725
IDNK	0.992825	0.989312	0.982214	0.918805	0.0754273
GALP	0.991492	0.990603	0.982175	0.918829	0.075482
LSM3	0.990935	0.991157	0.982172	0.918854	0.0755362
CDKN2B	0.995948	0.986159	0.982163	0.918878	0.0755904
C11orf20	0.991057	0.990999	0.982136	0.918902	0.0756452
UCN2	0.991451	0.990603	0.982135	0.918926	0.0756999
DNAJC24	0.991397	0.990656	0.982133	0.91895	0.0757546
C9orf37	0.994242	0.987812	0.982125	0.918973	0.0758094
LIN52	0.991424	0.990603	0.982108	0.918997	0.0758641
VMO1	0.994965	0.987077	0.982107	0.919021	0.0759183
XAGE5	0.988723	0.993298	0.982097	0.919045	0.0759731
C1orf54	0.991723	0.990287	0.98209	0.919069	0.0760278
RPS12	0.992485	0.989522	0.982086	0.919092	0.0760826
PYDC1	0.996208	0.985818	0.982079	0.919116	0.0761373
AP4S1	0.989442	0.992558	0.982078	0.91914	0.076192
UTF1	0.989591	0.992399	0.982069	0.919163	0.0762468
FAM19A1	0.992825	0.989154	0.982057	0.919187	0.0763015
FAM210B	0.991411	0.99055	0.982042	0.919211	0.0763557
C10orf35	0.992716	0.989233	0.982028	0.919234	0.0764105
HIST1H2BB	0.995143	0.986814	0.982021	0.919258	0.0764647
APITD1	0.989591	0.992346	0.982016	0.919281	0.0765194
UTS2D	0.989509	0.992425	0.982014	0.919305	0.0765736
NUDT2	0.991927	0.989997	0.982005	0.919328	0.0766278
C10orf57	0.99137	0.99055	0.982002	0.919351	0.0766825
BEX2	0.992335	0.989575	0.98199	0.919375	0.0767373
VAMP2	0.992104	0.989786	0.98197	0.919398	0.076792
IFNA2	0.991914	0.98997	0.981965	0.919421	0.0768468
UBL4A	0.991886	0.989997	0.981964	0.919444	0.0769015
TMEM70	0.992227	0.989654	0.981961	0.919468	0.0769563
PLGRKT	0.991166	0.990709	0.981956	0.919491	0.077011
POLR3K	0.993833	0.988049	0.981956	0.919514	0.0770652
PAEP	0.991424	0.990445	0.981951	0.919537	0.0771199
PMCH	0.991016	0.99084	0.981939	0.91956	0.0771747
KRTAP9-8	0.992757	0.989101	0.981937	0.919583	0.0772289
NGB	0.992254	0.989601	0.981936	0.919606	0.0772836
POLR2J2	0.991275	0.990577	0.981933	0.919629	0.0773384
PLEKHJ1	0.992213	0.989628	0.981921	0.919652	0.0773931
FXYD6-FXYD2	0.991261	0.990577	0.98192	0.919675	0.0774473
FAM183A	0.99258	0.989259	0.981919	0.919698	0.077501
C12orf39	0.988194	0.993643	0.981912	0.91972	0.0775557
GAGE6	0.991411	0.990418	0.981911	0.919743	0.0776646
GAGE12C	0.991411	0.990418	0.981911	0.919766	0.0776646
C5orf48	0.990908	0.99092	0.98191	0.919789	0.0777194
IFITM3	0.994515	0.987313	0.981898	0.919811	0.0777736
SPINLW1	0.990337	0.991474	0.981894	0.919834	0.0778283
BTF3L4	0.991873	0.989918	0.981872	0.919857	0.0778831
PFN4	0.990894	0.990893	0.98187	0.919879	0.0779378
EIF5AL1	0.993983	0.987812	0.981869	0.919902	0.077992
COX6A1	0.994297	0.987497	0.981865	0.919924	0.0780468
IFNA14	0.991995	0.989786	0.981863	0.919947	0.0781015
C12orf77	0.993152	0.988627	0.981857	0.919969	0.0781562
GGCT	0.991044	0.990709	0.981835	0.919992	0.078211
B2M	0.991166	0.990577	0.981826	0.920014	0.0782657
HIGD2A	0.994624	0.987129	0.981823	0.920036	0.0783199
HMGN5	0.988235	0.99351	0.981822	0.920059	0.0783741
AVP	0.993643	0.988101	0.98182	0.920081	0.0784289
TMEM93	0.995252	0.9865	0.981815	0.920103	0.0784836
CNEP1R1	0.991261	0.990471	0.981815	0.920125	0.0785383
ATP6V1F	0.994583	0.987156	0.981808	0.920148	0.0785931
KISS1	0.994365	0.987339	0.981776	0.92017	0.0786478
KRTAP5-7	0.992961	0.988733	0.981773	0.920192	0.0787026
FAM19A2	0.991139	0.99055	0.981773	0.920214	0.0787573
IFNA5	0.9919	0.989786	0.981769	0.920236	0.0788121
WFDC5	0.992118	0.989522	0.981723	0.920258	0.0788668
PDZK1IP1	0.991995	0.989628	0.981706	0.92028	0.078921
FAM136A	0.993152	0.98847	0.981701	0.920302	0.0789757
PPP1R17	0.992172	0.989443	0.981698	0.920324	0.0790294
CHURC1	0.990324	0.991289	0.981697	0.920346	0.0790841
CDV3	0.990188	0.991421	0.981693	0.920368	0.0791389
NXT1	0.993752	0.987865	0.981692	0.92039	0.0791931
GTSF1L	0.992444	0.989154	0.98168	0.920411	0.0792478
EFCAB2	0.990066	0.991527	0.981677	0.920433	0.079302
TNP2	0.994447	0.987156	0.981674	0.920455	0.0793568
IFNA6	0.991723	0.989865	0.981672	0.920477	0.0794115
PRIMA1	0.991791	0.989786	0.981661	0.920498	0.0794657
TIMM13	0.993534	0.988049	0.98166	0.92052	0.0795204
IGFL3	0.991071	0.990497	0.981653	0.920542	0.0795752
FABP2	0.990799	0.990761	0.981645	0.920563	0.0796299
MGP	0.990772	0.990788	0.981645	0.920585	0.0796847
EXOSC6	0.991873	0.98968	0.981637	0.920606	0.0797394
TMEM220	0.990813	0.990735	0.981633	0.920628	0.0797942
NPY	0.991016	0.990524	0.981625	0.920649	0.0798489
FGF4	0.991533	0.989997	0.981614	0.920671	0.0799026
CDKN2D	0.994624	0.986919	0.981614	0.920692	0.0799573
PLA2G2C	0.992295	0.989233	0.98161	0.920714	0.0800109
FXYD1	0.991764	0.989759	0.981608	0.920735	0.0800657
NKX2-5	0.995484	0.986054	0.981601	0.920756	0.0801199
PIGP	0.991941	0.989575	0.9816	0.920778	0.0801746
POLR2D	0.991465	0.990049	0.981599	0.920799	0.0802294
KCNE1	0.994256	0.987261	0.98159	0.92082	0.0802836
IFI6	0.993697	0.987812	0.981586	0.920841	0.0803383
TPRKB	0.99137	0.990128	0.981583	0.920863	0.0803931
PPP1R1A	0.993874	0.987628	0.981578	0.920884	0.0804478
ORAOV1	0.991655	0.989812	0.981552	0.920905	0.0805025
C13orf35	0.992417	0.989048	0.981548	0.920926	0.0805573
VAMP1	0.990405	0.991052	0.981543	0.920947	0.080612
ZFAND2A	0.992512	0.988943	0.981538	0.920968	0.0806668
CCL25	0.991139	0.990313	0.981537	0.920989	0.0807215
CSN1S1	0.992036	0.989417	0.981537	0.92101	0.0808299
SPAG11A	0.992036	0.989417	0.981537	0.921031	0.0808299
SF3B14	0.990663	0.990788	0.981537	0.921052	0.0808847
IFNA17	0.991846	0.989601	0.981532	0.921073	0.0809394
HES3	0.992567	0.988864	0.981514	0.921094	0.0809941
SRP19	0.990718	0.990709	0.981512	0.921114	0.0810489
RAMP2	0.990663	0.990761	0.981511	0.921135	0.0811036
TEX19	0.991479	0.989944	0.981508	0.921156	0.0811578
SPACA4	0.994092	0.987339	0.981507	0.921177	0.0812126
TCTEX1D4	0.992921	0.988496	0.981498	0.921197	0.0812673
C16orf92	0.992335	0.989075	0.981494	0.921218	0.0813221
MTCP1	0.991818	0.989575	0.981479	0.921239	0.0813768
UBE2D1	0.9905	0.990867	0.981454	0.921259	0.0814315
BEX4	0.991397	0.98997	0.981453	0.92128	0.0814863
FAM103A1	0.990392	0.990972	0.981451	0.921301	0.0815405
MGST1	0.992363	0.988996	0.981442	0.921321	0.0815952
TAC1	0.991275	0.990076	0.981437	0.921342	0.0816494
UBE2NL	0.993493	0.987865	0.981437	0.921362	0.0817042
CISD2	0.993384	0.98797	0.981433	0.921383	0.0817589
CLRN1	0.991995	0.989338	0.981419	0.921403	0.0818137
IFNA16	0.991982	0.989338	0.981405	0.921423	0.0818684
NTS	0.991057	0.99026	0.981404	0.921444	0.0819231
CRB3	0.993316	0.987996	0.981392	0.921464	0.0819779
UTS2	0.991968	0.989338	0.981392	0.921484	0.0820326
SPAG11B	0.991411	0.989891	0.981389	0.921505	0.0820874
CENPA	0.990881	0.990418	0.981386	0.921525	0.0821421
PPP3R1	0.99224	0.989048	0.981373	0.921545	0.0821969
ATPBD4	0.991383	0.989891	0.981362	0.921565	0.0822511
MRPS18C	0.991125	0.990128	0.981341	0.921586	0.0823058
SKP1	0.990718	0.990524	0.981329	0.921606	0.0823605
MRPL42	0.992036	0.989206	0.981328	0.921626	0.0824142
GAGE2D	0.991587	0.989654	0.981328	0.921646	0.0824689
C10orf25	0.991995	0.989233	0.981314	0.921666	0.0825237
C17orf65	0.993384	0.987839	0.981303	0.921686	0.0825784
MRPS6	0.991506	0.989707	0.9813	0.921706	0.0826332
NDUFA7	0.992295	0.988917	0.981297	0.921726	0.0826879
SRP14	0.991682	0.989522	0.981292	0.921746	0.0827427
LY6E	0.993207	0.987996	0.981284	0.921766	0.0827974
NDUFB6	0.990459	0.990735	0.981283	0.921786	0.0828521
C1orf144	0.992376	0.988812	0.981273	0.921806	0.0829069
C1orf86	0.99224	0.988943	0.981269	0.921826	0.0829605
PRR15	0.995252	0.985949	0.981267	0.921846	0.0830153
RBP2	0.992417	0.988759	0.981261	0.921865	0.08307
C8orf44	0.99171	0.989443	0.98124	0.921885	0.0831248
RPS15A	0.991914	0.989233	0.981233	0.921905	0.0831795
CST5	0.991859	0.989285	0.981232	0.921925	0.0832337
EIF4EBP2	0.993629	0.987523	0.981232	0.921944	0.0832884
EDDM3A	0.991139	0.989997	0.981224	0.921964	0.0833426
IFNA21	0.991791	0.989338	0.981217	0.921984	0.0833968
MAGOHB	0.99084	0.990287	0.981215	0.922003	0.083451
HRSP12	0.99031	0.990788	0.981187	0.922023	0.0835058
PLAC1L	0.991941	0.989154	0.981182	0.922042	0.0835605
C14orf119	0.991016	0.990076	0.981181	0.922062	0.0836153
C6orf1	0.992349	0.988733	0.981168	0.922081	0.08367
TNFRSF13C	0.992417	0.988654	0.981157	0.922101	0.0837247
MANF	0.992199	0.988864	0.98115	0.92212	0.0837795
CMTM3	0.991927	0.989127	0.981142	0.92214	0.0838342
HBZ	0.994433	0.986631	0.981138	0.922159	0.083889
MAP1LC3B	0.989808	0.991236	0.981134	0.922179	0.0839437
SSNA1	0.994188	0.986867	0.981131	0.922198	0.0839979
C7orf41	0.993384	0.987655	0.98112	0.922217	0.0840527
NUTF2	0.990663	0.990366	0.981119	0.922236	0.0841074
ENDOG	0.989998	0.991025	0.981113	0.922256	0.0841622
ORMDL1	0.992785	0.988233	0.981102	0.922275	0.0842169
IL1RN	0.992281	0.988733	0.981101	0.922294	0.0842716
MAL2	0.990853	0.990155	0.981098	0.922313	0.0843264
C12orf54	0.989319	0.991685	0.981094	0.922333	0.0843811
C10orf111	0.993275	0.987733	0.981091	0.922352	0.0844353
MAP1LC3A	0.993588	0.987418	0.981087	0.922371	0.0844884
LY6H	0.990962	0.990023	0.981075	0.92239	0.0845432
NAA50	0.990487	0.990497	0.981075	0.922409	0.0845974
ADM2	0.991166	0.989812	0.981068	0.922428	0.0846521
RNASE13	0.99224	0.988733	0.98106	0.922447	0.0847068
FAM216B	0.990989	0.98997	0.98105	0.922466	0.0847616
TBC1D29	0.991329	0.989628	0.981047	0.922485	0.0848163
AAED1	0.98993	0.991025	0.981046	0.922504	0.0848711
BLOC1S1	0.99065	0.990287	0.981027	0.922523	0.0849258
DEFB129	0.992308	0.988627	0.981023	0.922542	0.0849806
EDDM3B	0.990962	0.98997	0.981023	0.922561	0.0850353
TMEM134	0.989035	0.991897	0.98102	0.92258	0.085089
TMEM159	0.991982	0.988943	0.981013	0.922598	0.0851437
CLECL1	0.99137	0.989549	0.981009	0.922617	0.0851979
KRTAP5-9	0.992621	0.988285	0.980993	0.922636	0.0852526
FAM100B	0.993356	0.98755	0.980989	0.922655	0.0853074
VAMP4	0.990188	0.990709	0.980988	0.922673	0.0853621
UBL3	0.989713	0.991184	0.980987	0.922692	0.0854169
KRTAP12-2	0.993615	0.987287	0.980983	0.922711	0.0854711
MRPL21	0.991574	0.989312	0.980975	0.922729	0.0855253
SNCG	0.992648	0.988233	0.980968	0.922748	0.0855795
44454	0.993384	0.987497	0.980963	0.922767	0.0856337
NPPC	0.993356	0.987497	0.980937	0.922785	0.0856884
MOB1A	0.991846	0.988996	0.980931	0.922804	0.0857431
PIN1	0.991791	0.989048	0.98093	0.922822	0.0857979
SH2D1B	0.989835	0.990999	0.980925	0.922841	0.0858515
CXCL6	0.994215	0.986631	0.980923	0.922859	0.0859063
IFITM2	0.993125	0.987707	0.980917	0.922878	0.085961
C14orf109	0.992621	0.988207	0.980915	0.922896	0.0860158
CENPBD1	0.989102	0.991712	0.980904	0.922915	0.0860705
CDRT4	0.993615	0.987182	0.980879	0.922933	0.0861253
TSPAN19	0.990079	0.990682	0.980854	0.922951	0.08618
LOR	0.990337	0.990418	0.980848	0.92297	0.0862347
C7orf44	0.991247	0.989496	0.980835	0.922988	0.0862895
YPEL2	0.988601	0.992134	0.980825	0.923006	0.0863442
OPALIN	0.991682	0.989048	0.980822	0.923024	0.0863984
CARTPT	0.991995	0.988733	0.980818	0.923043	0.0864532
ATAD3C	0.98772	0.993007	0.980813	0.923061	0.0865079
C4orf26	0.991723	0.988996	0.98081	0.923079	0.0865621
IFNA4	0.991737	0.988969	0.980797	0.923097	0.0866163
MUTED	0.98936	0.991342	0.980794	0.923115	0.086671
POLR2J	0.990772	0.989918	0.980782	0.923134	0.0867252
RPL35A	0.990093	0.990577	0.980763	0.923152	0.08678
RPS23	0.991927	0.988733	0.980751	0.92317	0.0868347
HIST1H2BG	0.995006	0.985661	0.980738	0.923188	0.0868895
MB	0.992567	0.988075	0.98073	0.923206	0.0869431
RGCC	0.99322	0.987418	0.980724	0.923224	0.0869979
UBE2V2	0.992077	0.988548	0.980716	0.923242	0.0870526
LEP	0.991968	0.988654	0.980713	0.92326	0.0871074
NUDT4	0.990568	0.990049	0.980711	0.923278	0.0871621
FAM163A	0.993547	0.987077	0.980707	0.923296	0.0872168
MZT2B	0.99307	0.98755	0.980706	0.923313	0.0872716
RGS13	0.990826	0.989786	0.980706	0.923331	0.0873263
SAA1	0.990324	0.990287	0.980704	0.923349	0.0873811
MSMP	0.991139	0.98947	0.980702	0.923367	0.0874358
TMEM42	0.992716	0.987891	0.980696	0.923385	0.0874906
CREBL2	0.989523	0.991078	0.980694	0.923403	0.0875453
FGF1	0.992757	0.987839	0.980684	0.92342	0.0875995
PFDN6	0.990826	0.989759	0.98068	0.923438	0.0876542
KLRC4	0.990079	0.990497	0.980671	0.923456	0.087709
CSF2	0.992158	0.988417	0.980666	0.923473	0.0877632
RNF24	0.990541	0.990023	0.980658	0.923491	0.0878179
C9orf123	0.994761	0.985818	0.980653	0.923509	0.0878721
PIGH	0.991982	0.988575	0.980648	0.923526	0.0879269
IFNA7	0.991941	0.988601	0.980634	0.923544	0.0879816
C1orf61	0.992104	0.988417	0.980612	0.923562	0.0880363
ASF1A	0.990677	0.989838	0.98061	0.923579	0.0880911
TXNDC17	0.991383	0.989127	0.980604	0.923597	0.0881458
ZNRF2	0.987165	0.993351	0.980602	0.923614	0.0882006
ZNF268	0.989903	0.990603	0.980601	0.923632	0.0882553
THRSP	0.993275	0.987234	0.980595	0.923649	0.0883095
IL1F10	0.991451	0.989048	0.980593	0.923667	0.0883643
NDP	0.991492	0.988996	0.980581	0.923684	0.0884185
CPLX2	0.993547	0.986946	0.980577	0.923701	0.0884727
HIST2H4B	0.995552	0.984954	0.980573	0.923719	0.0885821
HIST2H4A	0.995552	0.984954	0.980573	0.923736	0.0885821
LYPD1	0.992798	0.987681	0.980568	0.923753	0.0886363
TCEB2	0.994038	0.986447	0.980566	0.923771	0.0886911
RPL37	0.991574	0.98889	0.980558	0.923788	0.0887458
DYDC2	0.991044	0.989417	0.980555	0.923805	0.0888006
KRTAP9-2	0.992131	0.988312	0.980535	0.923822	0.0888548
CDA	0.992022	0.988417	0.980532	0.92384	0.088909
C8orf31	0.991044	0.989391	0.980529	0.923857	0.0889637
RNASE7	0.991927	0.988496	0.980516	0.923874	0.0890184
BTG2	0.993438	0.986972	0.980496	0.923891	0.0890732
KLF16	0.992485	0.987917	0.980493	0.923908	0.0891279
MMGT1	0.990134	0.99026	0.98049	0.923925	0.0891827
KRTAP5-2	0.99258	0.987812	0.980483	0.923943	0.0892374
C19orf80	0.992077	0.988312	0.980481	0.92396	0.0892922
TMEM207	0.990351	0.990023	0.98047	0.923977	0.0893469
LYZL4	0.991927	0.988417	0.980438	0.923994	0.0894017
POLE3	0.992744	0.987602	0.980436	0.924011	0.0894548
PSORS1C1	0.990921	0.989417	0.980434	0.924028	0.0895095
MPHOSPH6	0.989889	0.990445	0.980431	0.924045	0.0895637
VPREB1	0.993016	0.987313	0.980418	0.924062	0.0896184
RGS21	0.989998	0.990313	0.980408	0.924079	0.0896732
LYZL6	0.991628	0.98868	0.980403	0.924095	0.0897279
PLA2G2A	0.992471	0.987839	0.980402	0.924112	0.0897827
CMTM7	0.991451	0.988838	0.980385	0.924129	0.0898369
HIST1H2BD	0.995197	0.985111	0.980379	0.924146	0.0898905
PYY	0.994692	0.985608	0.980377	0.924163	0.0899447
KRTAP4-4	0.99205	0.988233	0.980376	0.92418	0.0899995
HRCT1	0.994638	0.985661	0.980375	0.924196	0.0900536
CST6	0.992145	0.988128	0.980366	0.924213	0.0901084
RAMP1	0.993016	0.987261	0.980366	0.92423	0.0901631
CYBA	0.990867	0.989391	0.980354	0.924247	0.0902179
SPA17	0.990772	0.98947	0.980339	0.924263	0.0902715
SFT2D1	0.989659	0.990577	0.980333	0.92428	0.0903263
C11orf45	0.992716	0.987523	0.980331	0.924297	0.090381
LY96	0.989876	0.990339	0.980313	0.924313	0.0904352
ZNRD1	0.992063	0.988154	0.980311	0.92433	0.0904894
C20orf141	0.992825	0.987392	0.980308	0.924346	0.0905436
MYL12A	0.992499	0.987707	0.980298	0.924363	0.0905983
CHCHD4	0.990826	0.989364	0.980288	0.92438	0.0906525
TAF13	0.988452	0.991738	0.980285	0.924396	0.0907073
IGJ	0.991139	0.989048	0.980284	0.924413	0.090762
ANG	0.992921	0.987261	0.980272	0.924429	0.0908162
HIST1H2BM	0.99502	0.985163	0.980257	0.924445	0.090871
KAAG1	0.993479	0.986683	0.980249	0.924462	0.0909257
PDRG1	0.990514	0.989628	0.98024	0.924478	0.0909794
DPM3	0.993356	0.986788	0.980232	0.924495	0.0910341
RNASE1	0.993697	0.986447	0.98023	0.924511	0.0910888
IQCJ	0.989536	0.990577	0.980212	0.924528	0.091143
CYHR1	0.987612	0.992505	0.980209	0.924544	0.0911978
CBY1	0.99209	0.988023	0.980208	0.92456	0.0912525
UBE2G2	0.992485	0.987628	0.980206	0.924576	0.0913073
LECT2	0.990948	0.989154	0.9802	0.924593	0.0913615
VPREB3	0.991954	0.988128	0.980178	0.924609	0.0914162
IFNW1	0.991941	0.988128	0.980164	0.924625	0.091471
TMIE	0.991832	0.988233	0.980161	0.924642	0.0915257
FAM69A	0.987233	0.992822	0.980147	0.924658	0.0915804
TRIM61	0.990419	0.989628	0.980146	0.924674	0.0916352
C11orf52	0.992363	0.987681	0.980138	0.92469	0.0916888
SRRM5	0.980988	0.999114	0.980119	0.924706	0.0917436
GEMIN6	0.991234	0.988785	0.980117	0.924722	0.0917978
CNFN	0.992648	0.987366	0.980107	0.924738	0.091852
RAMP3	0.993465	0.986552	0.980105	0.924755	0.0919062
PPDPF	0.992961	0.987051	0.980103	0.924771	0.0919598
C9orf47	0.991112	0.98889	0.980101	0.924787	0.0920146
IFNA8	0.990663	0.989338	0.980101	0.924803	0.0920688
CRCP	0.991003	0.988996	0.980098	0.924819	0.092123
KRTAP13-1	0.99224	0.98776	0.980095	0.924835	0.0921777
KRTAP13-4	0.992363	0.987628	0.980085	0.924851	0.0922324
IFNA13	0.991016	0.988969	0.980085	0.924867	0.0922872
RBM4	0.992458	0.987523	0.980075	0.924883	0.0923419
DBNDD2	0.990636	0.989338	0.980074	0.924898	0.0923967
C19orf12	0.993615	0.986368	0.980071	0.924914	0.0924509
CST1	0.992417	0.98755	0.980061	0.92493	0.0925045
RPL32	0.992757	0.987208	0.980058	0.924946	0.0925593
SNCB	0.990745	0.989206	0.980051	0.924962	0.092614
PIGF	0.990188	0.989759	0.980048	0.924978	0.0926687
C16orf55	0.992376	0.987576	0.980047	0.924994	0.0927235
LYRM1	0.990025	0.989918	0.980043	0.925009	0.0927782
IL13	0.991411	0.988522	0.980031	0.925025	0.092833
TMEM170A	0.992227	0.987707	0.980029	0.925041	0.0928877
CHCHD5	0.991954	0.98797	0.980021	0.925057	0.0929419
MAFF	0.992716	0.987208	0.980018	0.925072	0.0929967
TTC32	0.992158	0.98776	0.980014	0.925088	0.0930514
BOD1	0.989781	0.990128	0.98001	0.925104	0.0931056
FNDC5	0.992866	0.987051	0.980009	0.925119	0.0931603
C10orf82	0.991669	0.988233	0.98	0.925135	0.0932145
MYL12B	0.992539	0.987366	0.979999	0.92515	0.0932682
LAMTOR1	0.991057	0.988838	0.979995	0.925166	0.0933229
LAMTOR2	0.991859	0.988023	0.979979	0.925182	0.0933771
CLC	0.989564	0.990313	0.979978	0.925197	0.0934319
EMP1	0.99209	0.987786	0.979973	0.925213	0.0934866
CEND1	0.993384	0.9865	0.979973	0.925228	0.0935414
PMP22	0.99156	0.988312	0.97997	0.925244	0.0935956
FXN	0.990636	0.989233	0.97997	0.925259	0.0936503
NINJ1	0.993561	0.986316	0.979965	0.925275	0.093705
C16orf54	0.992227	0.987628	0.979951	0.92529	0.0938145
NDUFB7	0.993861	0.986001	0.979948	0.925306	0.0938693
HIST1H2BC	0.995047	0.984823	0.979945	0.925321	0.093924
IFNB1	0.990446	0.989391	0.979938	0.925336	0.0939788
AGR3	0.989469	0.990366	0.979936	0.925352	0.0940335
ACN9	0.992553	0.987287	0.979935	0.925367	0.0940882
CFL2	0.990147	0.98968	0.979929	0.925382	0.094143
CSTL1	0.989957	0.989865	0.979924	0.925398	0.0941977
RPL34	0.990324	0.989496	0.979921	0.925413	0.0942525
YPEL5	0.991859	0.987944	0.979901	0.925428	0.0943072
ATP5G2	0.99122	0.988575	0.979895	0.925443	0.0943614
TSPO2	0.991193	0.988601	0.979895	0.925459	0.0944162
GAPT	0.991614	0.98818	0.979894	0.925474	0.0944709
GNPNAT1	0.990541	0.989233	0.979875	0.925489	0.0945251
IFNA10	0.990555	0.989206	0.979863	0.925504	0.0945798
IGFBP7	0.988601	0.991157	0.979859	0.92552	0.0946346
MED10	0.990704	0.989048	0.979854	0.925535	0.0946893
PTGES	0.993683	0.98608	0.979851	0.92555	0.0947441
TCEAL1	0.993179	0.986578	0.979849	0.925565	0.0947988
DUSP13	0.991805	0.987944	0.979847	0.92558	0.0948536
SPATA12	0.99175	0.987996	0.979846	0.925595	0.0949083
UFSP1	0.993438	0.986316	0.979844	0.92561	0.094963
PAGE1	0.990269	0.98947	0.979841	0.925625	0.0950178
HIST1H2BI	0.994938	0.984823	0.979838	0.92564	0.0950725
BTF3	0.990337	0.989391	0.97983	0.925655	0.0951273
KRTAP5-8	0.991832	0.987891	0.979822	0.92567	0.095182
TNFSF18	0.991193	0.988522	0.979816	0.925685	0.0952368
ARL4A	0.99137	0.988338	0.979808	0.9257	0.0952915
FAM133B	0.98768	0.992029	0.979807	0.925715	0.0953463
UBA52	0.992104	0.987602	0.979804	0.92573	0.095401
LMO3	0.991574	0.988128	0.979801	0.925745	0.0954557
ATP5H	0.98955	0.990128	0.979782	0.92576	0.0955105
SCIMP	0.989442	0.990234	0.979778	0.925775	0.0955647
SREK1IP1	0.988492	0.991184	0.979777	0.92579	0.0956194
IFNA1	0.990622	0.989048	0.979774	0.925804	0.0956742
SELT	0.991465	0.988207	0.979772	0.925819	0.0957284
LIMD2	0.992757	0.986919	0.979771	0.925834	0.0957831
MCEE	0.99156	0.988101	0.979762	0.925849	0.0958378
TYROBP	0.991927	0.987733	0.97976	0.925864	0.0958926
MED21	0.989631	0.990023	0.979758	0.925878	0.0959473
MZT2A	0.99258	0.987077	0.979753	0.925893	0.0960021
ARL17B	0.991655	0.987996	0.979752	0.925908	0.0960568
GNRH2	0.98936	0.99026	0.979724	0.925922	0.0961116
MRPS16	0.992839	0.986788	0.979722	0.925937	0.0961652
PPIAL4G	0.99273	0.986893	0.979719	0.925952	0.0962189
LY86	0.990962	0.988654	0.979718	0.925966	0.0962736
C10orf91	0.99307	0.986552	0.979716	0.925981	0.0963273
HIST1H2BF	0.995156	0.984483	0.979714	0.925996	0.0963815
RBX1	0.989347	0.99026	0.979711	0.92601	0.0964362
UBD	0.991846	0.98776	0.979705	0.926025	0.0965457
TTR	0.991846	0.98776	0.979705	0.926039	0.0965457
HIST1H2BJ	0.995143	0.984483	0.979701	0.926054	0.0966004
UBE2L3	0.991207	0.988391	0.979699	0.926068	0.0966552
MAP1LC3C	0.992499	0.987103	0.979699	0.926083	0.0967099
LSM10	0.993765	0.985844	0.979698	0.926097	0.0967647
CST7	0.99137	0.988207	0.979678	0.926112	0.0968189
NUDT8	0.993792	0.985792	0.979672	0.926126	0.0968736
MRPL30	0.990595	0.988969	0.979668	0.926141	0.0969278
RFK	0.990487	0.989075	0.979665	0.926155	0.0969825
NMB	0.989957	0.989601	0.979663	0.92617	0.0970373
C3orf22	0.991601	0.987944	0.979646	0.926184	0.0970915
LY6G6D	0.99065	0.98889	0.979644	0.926198	0.0971457
HIST1H2BO	0.99502	0.984535	0.979632	0.926213	0.0971993
PRM2	0.992608	0.986919	0.979624	0.926227	0.0972541
UBE2N	0.992022	0.987497	0.979619	0.926241	0.0973088
THEM6	0.993316	0.986211	0.979619	0.926256	0.0973636
TNFSF4	0.990568	0.988943	0.979616	0.92627	0.0974183
GIP	0.990541	0.988969	0.979615	0.926284	0.0974725
EIF4E3	0.989062	0.990445	0.979611	0.926299	0.0975272
RPS15	0.993888	0.985635	0.97961	0.926313	0.097582
FAM9C	0.98993	0.989575	0.97961	0.926327	0.0976367
SOD1	0.99209	0.987418	0.979608	0.926341	0.0976915
FAM26F	0.987951	0.991553	0.979606	0.926355	0.0977462
RNASE4	0.992825	0.986683	0.979604	0.92637	0.097801
IL7	0.989998	0.989496	0.979599	0.926384	0.0978557
C14orf126	0.991995	0.987497	0.979592	0.926398	0.0979099
ID3	0.993547	0.985949	0.979587	0.926412	0.0979646
YPEL4	0.991805	0.987681	0.979587	0.926426	0.0980194
VIP	0.990826	0.988654	0.979584	0.92644	0.0980741
RPS20	0.98898	0.990497	0.979583	0.926454	0.0981289
NANOS1	0.990527	0.988943	0.979575	0.926468	0.0981831
C7orf55	0.992689	0.986788	0.979574	0.926482	0.0982378
TNFAIP8	0.992526	0.986946	0.979569	0.926497	0.0982925
C5orf55	0.993343	0.986132	0.979568	0.926511	0.0983473
C4orf45	0.991152	0.988312	0.979567	0.926525	0.0984009
HIST1H2BH	0.995033	0.984456	0.979567	0.926539	0.0984557
EFCAB1	0.989347	0.990102	0.979554	0.926552	0.0985099
FAM96B	0.994038	0.985425	0.97955	0.926566	0.0985646
GML	0.991234	0.988207	0.979544	0.92658	0.0986194
HIST1H4A	0.99588	0.983594	0.979541	0.926594	0.098673
ATG12	0.989591	0.989838	0.979535	0.926608	0.0987261
MED31	0.989428	0.989997	0.97953	0.926622	0.0987809
GAGE1	0.990718	0.988706	0.979529	0.926636	0.0988345
AGRP	0.992431	0.986998	0.979527	0.92665	0.0988893
NKAIN3	0.990867	0.988548	0.97952	0.926664	0.098944
RNF135	0.988547	0.990867	0.979518	0.926678	0.0989987
BATF	0.99239	0.987024	0.979513	0.926691	0.0990524
UCN3	0.993779	0.985635	0.979503	0.926705	0.0991066
NUDT7	0.990731	0.988654	0.97949	0.926719	0.0991613
UBE2B	0.988913	0.990471	0.979489	0.926733	0.0992161
GFER	0.991519	0.987865	0.979487	0.926746	0.0992708
C3orf36	0.992172	0.987208	0.97948	0.92676	0.0993256
PPP1R14D	0.989944	0.989417	0.979467	0.926774	0.0993798
CLEC2L	0.991886	0.987471	0.979459	0.926788	0.099434
LSM1	0.988642	0.990709	0.979456	0.926801	0.0994887
FKBP11	0.991057	0.988285	0.979447	0.926815	0.0995434
GOLT1A	0.99103	0.988312	0.979447	0.926829	0.0995982
FUNDC1	0.988723	0.990603	0.979432	0.926842	0.0996529
RAP2C	0.991846	0.987471	0.979419	0.926856	0.0997077
PSORS1C2	0.991288	0.988023	0.979415	0.926869	0.0997619
MED11	0.991914	0.987392	0.979408	0.926883	0.0998166
PDCL2	0.991016	0.988285	0.979407	0.926897	0.0998714
CETN3	0.989225	0.990076	0.979407	0.92691	0.0999255
ZNF593	0.990093	0.989206	0.979406	0.926924	0.0999803
PCNP	0.989428	0.989865	0.9794	0.926937	0.100035
TAX1BP3	0.99303	0.986264	0.979389	0.926951	0.10009
TWIST1	0.992499	0.986788	0.979386	0.926964	0.100145
FAM86C1	0.990622	0.988654	0.979383	0.926978	0.100199
NKAIN4	0.989984	0.989285	0.979377	0.926991	0.100253
EIF5A2	0.990772	0.988496	0.979374	0.927005	0.100308
HIST1H2BL	0.995047	0.984247	0.979372	0.927018	0.100362
ZCCHC10	0.989821	0.989443	0.979372	0.927032	0.100417
RBM3	0.992295	0.986972	0.979367	0.927045	0.100471
PPP1R14B	0.992662	0.986605	0.979365	0.927058	0.100526
C3orf24	0.992077	0.987182	0.97936	0.927072	0.10058
UBE2D3	0.990283	0.988969	0.97936	0.927085	0.100635
CAV1	0.993343	0.985923	0.979359	0.927099	0.10069
CALM1	0.990459	0.988785	0.979352	0.927112	0.100744
C17orf79	0.990052	0.98918	0.97934	0.927125	0.100799
HDGFL1	0.991546	0.987681	0.979332	0.927139	0.100853
APOPT1	0.987937	0.991289	0.979331	0.927152	0.100908
CST4	0.991438	0.987786	0.979328	0.927165	0.100962
C15orf54	0.991669	0.98755	0.979322	0.927178	0.101071
NR2C2AP	0.991669	0.98755	0.979322	0.927192	0.101071
HINT2	0.989292	0.989891	0.979292	0.927205	0.101126
VBP1	0.988574	0.990603	0.979284	0.927218	0.10118
BCL2L15	0.991356	0.987812	0.979274	0.927231	0.101235
TMEM52	0.991818	0.987339	0.979261	0.927245	0.10129
C12orf57	0.99382	0.985346	0.979257	0.927258	0.101344
YPEL1	0.990174	0.988969	0.979252	0.927271	0.101399
HIST1H4D	0.99603	0.98315	0.979247	0.927284	0.101453
TMEM92	0.991873	0.987261	0.979237	0.927297	0.101508
TMEM138	0.990527	0.988601	0.979236	0.92731	0.101563
CXorf40A	0.991764	0.987366	0.979234	0.927323	0.101618
DAZAP2	0.991655	0.987471	0.979231	0.927337	0.101672
RPL27	0.991995	0.987129	0.979228	0.92735	0.101727
AKIRIN1	0.988113	0.990999	0.979219	0.927363	0.101781
MRP63	0.995361	0.983777	0.979213	0.927376	0.101836
PLDN	0.987341	0.991765	0.97921	0.927389	0.101891
BTC	0.991492	0.987602	0.9792	0.927402	0.101946
IL36A	0.990555	0.988522	0.979185	0.927415	0.102
FAU	0.993084	0.986001	0.979182	0.927428	0.102055
KCNE1L	0.993479	0.985608	0.979181	0.927441	0.102109
DHFR	0.991302	0.98776	0.979168	0.927454	0.102163
PRH1	0.990351	0.988706	0.979166	0.927467	0.102218
CST9	0.991506	0.98755	0.979161	0.92748	0.102272
DEFB125	0.989631	0.989417	0.979158	0.927493	0.102327
SELV	0.98875	0.990287	0.979146	0.927505	0.102381
PIP	0.990962	0.988075	0.979145	0.927518	0.102436
FAM19A5	0.994542	0.984509	0.979136	0.927531	0.10249
HIST1H2BN	0.994883	0.984169	0.979133	0.927544	0.102544
C15orf53	0.990731	0.988285	0.979125	0.927557	0.102599
PLA2G1B	0.992118	0.986893	0.979114	0.92757	0.102653
ATF3	0.989469	0.989522	0.979101	0.927583	0.102708
SPACA5B	0.991207	0.987786	0.9791	0.927595	0.102817
SPACA5	0.991207	0.987786	0.9791	0.927608	0.102817
SYNJ2BP	0.991179	0.987812	0.979099	0.927621	0.102871
CRABP2	0.990039	0.988943	0.979092	0.927634	0.102926
AP1S3	0.990459	0.988522	0.979091	0.927647	0.10298
AVPI1	0.993043	0.985949	0.97909	0.927659	0.103035
NPPA	0.992213	0.986762	0.979078	0.927672	0.10309
REG3G	0.989916	0.989048	0.979075	0.927685	0.103144
PRELID2	0.989387	0.989575	0.979073	0.927697	0.103199
SFT2D2	0.988723	0.990234	0.979067	0.92771	0.103253
SUPT4H1	0.989536	0.989417	0.979064	0.927723	0.103308
NDUFB4	0.990215	0.988733	0.979058	0.927736	0.103362
FXC1	0.990134	0.988812	0.979056	0.927748	0.103417
VCX2	0.994011	0.984954	0.979054	0.927761	0.103471
TCL1B	0.991397	0.98755	0.979054	0.927773	0.103526
CCL23	0.990392	0.988548	0.97905	0.927786	0.103581
BCL2A1	0.990364	0.988575	0.979049	0.927799	0.103635
MS4A13	0.989225	0.989707	0.979042	0.927811	0.10369
MRPL27	0.992553	0.986368	0.979023	0.927824	0.103744
CKLF	0.991533	0.987366	0.979006	0.927836	0.103799
UBE2D4	0.990161	0.988733	0.979004	0.927849	0.103854
PTRH2	0.990704	0.98818	0.978994	0.927861	0.103908
RPL28	0.993438	0.985451	0.978985	0.927874	0.103963
MGST2	0.990079	0.988785	0.978976	0.927886	0.104018
LYZ	0.990052	0.988812	0.978975	0.927899	0.104072
TOMM22	0.992213	0.986657	0.978974	0.927911	0.104127
RABIF	0.990677	0.98818	0.978967	0.927924	0.104181
EIF1AD	0.990514	0.988338	0.978962	0.927936	0.104236
HIST1H2BE	0.99502	0.983855	0.978955	0.927949	0.10429
SPCS3	0.993942	0.984901	0.978935	0.927961	0.104344
PFDN5	0.990799	0.988023	0.978932	0.927974	0.104399
VHLL	0.99103	0.987786	0.978926	0.927986	0.104452
FAM18B2-CDRT4	0.989211	0.989601	0.978924	0.927998	0.104506
QRFP	0.99303	0.985792	0.97892	0.928011	0.104561
BUD31	0.992077	0.986736	0.978918	0.928023	0.104615
TTC9	0.989414	0.989391	0.978917	0.928035	0.104669
LY6G5C	0.989306	0.989496	0.978914	0.928048	0.104724
GLRX2	0.991071	0.987733	0.978914	0.92806	0.104779
OXT	0.994488	0.984326	0.9789	0.928072	0.104833
PLA2G2D	0.990052	0.988733	0.978897	0.928085	0.104888
DNLZ	0.992526	0.986264	0.978892	0.928097	0.104943
GJD3	0.99069	0.988075	0.978876	0.928109	0.104998
ACOT6	0.991179	0.987576	0.978865	0.928121	0.105052
FAM107A	0.992866	0.985897	0.978863	0.928134	0.105107
STMN1	0.988194	0.99055	0.978856	0.928146	0.105162
NPVF	0.990853	0.987891	0.978855	0.928158	0.105217
GABARAP	0.989916	0.988812	0.978841	0.92817	0.105271
BLOC1S3	0.993656	0.985085	0.978835	0.928182	0.105325
ATP6V1G2	0.989699	0.989022	0.978834	0.928195	0.10538
PAM16	0.991411	0.987313	0.978833	0.928207	0.105434
HIST1H4E	0.994433	0.9843	0.97882	0.928219	0.105488
MALL	0.991818	0.986893	0.978819	0.928231	0.105543
HIST1H4I	0.995989	0.982758	0.978816	0.928243	0.105597
HSPB3	0.990283	0.988417	0.978812	0.928255	0.105652
ANKRD37	0.991044	0.987655	0.978809	0.928267	0.105706
MSRB2	0.990745	0.987944	0.9788	0.928279	0.105761
LZIC	0.989048	0.989628	0.978789	0.928292	0.105816
MRPL53	0.994924	0.983777	0.978783	0.928304	0.105871
GMFB	0.989252	0.989417	0.978782	0.928316	0.105925
C9orf85	0.990066	0.988601	0.97878	0.928328	0.10598
TFF2	0.990432	0.988233	0.978778	0.92834	0.106034
C17orf64	0.989455	0.989206	0.978775	0.928352	0.106088
MAL	0.9919	0.986762	0.978769	0.928364	0.106143
NXNL2	0.994829	0.983855	0.978767	0.928376	0.106198
MYL6	0.990201	0.988443	0.978758	0.928388	0.106252
IL22	0.991071	0.987576	0.978758	0.9284	0.106306
MORN4	0.990595	0.988049	0.978757	0.928412	0.106361
CCDC153	0.989455	0.98918	0.978749	0.928423	0.106415
POLR2H	0.989849	0.988785	0.978748	0.928435	0.10647
TMEM50B	0.989265	0.989364	0.978744	0.928447	0.106524
ZNHIT3	0.991315	0.987313	0.978739	0.928459	0.106579
HIST1H2AA	0.993397	0.985242	0.978736	0.928471	0.106634
NPC2	0.989754	0.988864	0.978732	0.928483	0.106689
ORMDL2	0.990745	0.987865	0.978722	0.928495	0.106743
RNF11	0.991424	0.987182	0.978716	0.928507	0.106798
SDHAF2	0.991261	0.987339	0.978711	0.928518	0.106851
NDUFS6	0.99337	0.985242	0.97871	0.92853	0.106906
KRTAP1-3	0.992022	0.986578	0.978708	0.928542	0.106961
CALM3	0.99065	0.987944	0.978706	0.928554	0.107015
ANKRD9	0.990487	0.988101	0.978701	0.928566	0.10707
TCTEX1D2	0.989564	0.989022	0.9787	0.928577	0.107124
ARL1	0.988682	0.989891	0.978688	0.928589	0.107178
FGF20	0.991288	0.987287	0.978686	0.928601	0.107233
TXNL4A	0.993002	0.985582	0.978685	0.928613	0.107287
TMEM80	0.991628	0.986946	0.978683	0.928624	0.107341
KIAA1143	0.991179	0.987392	0.978683	0.928636	0.107396
SNX22	0.990174	0.988391	0.978679	0.928648	0.10745
C10orf95	0.990595	0.98797	0.978678	0.92866	0.107504
DUSP3	0.992757	0.985818	0.978678	0.928671	0.107559
H2AFZ	0.991778	0.986788	0.978674	0.928683	0.107614
MESP1	0.991587	0.986972	0.978669	0.928695	0.107668
C9orf71	0.990473	0.988075	0.978662	0.928706	0.107776
KRTAP13-2	0.992186	0.986368	0.978661	0.928718	0.10783
LAIR2	0.990881	0.987655	0.978648	0.928729	0.107885
RPL31	0.991614	0.986919	0.978644	0.928741	0.107939
TMEM18	0.990188	0.988338	0.97864	0.928753	0.107994
HIST3H2BB	0.994911	0.983646	0.97864	0.928764	0.108048
C15orf41	0.992158	0.986368	0.978634	0.928776	0.108103
CEBPG	0.991152	0.987366	0.97863	0.928787	0.108158
HIST1H4C	0.99416	0.984378	0.97863	0.928799	0.108212
DUSP28	0.993629	0.984901	0.978626	0.92881	0.108266
PLD6	0.990785	0.987707	0.978606	0.928822	0.108321
MTFP1	0.992526	0.985975	0.978606	0.928833	0.108376
HIST1H4H	0.993629	0.984875	0.9786	0.928845	0.108431
C14orf1	0.99012	0.988364	0.978599	0.928856	0.108485
RGS5	0.990541	0.987944	0.978599	0.928868	0.108595
CMTM4	0.990541	0.987944	0.978599	0.928879	0.108595
RPS27A	0.990663	0.987812	0.978589	0.928891	0.108649
CXorf40B	0.9919	0.986578	0.978587	0.928902	0.108704
TMEM65	0.988736	0.989733	0.978585	0.928914	0.108758
MAX	0.988926	0.989522	0.978565	0.928925	0.108813
C9orf116	0.993302	0.985163	0.978564	0.928936	0.108867
CHCHD1	0.992812	0.985635	0.97855	0.928948	0.108922
CCDC58	0.989116	0.989312	0.978544	0.928959	0.108977
HIST1H4F	0.994542	0.983907	0.978537	0.928971	0.109031
GYPA	0.989333	0.989075	0.978524	0.928982	0.109086
CSDC2	0.991383	0.987024	0.97852	0.928993	0.109141
PLA2G2E	0.992431	0.985975	0.978512	0.929005	0.109195
GNLY	0.990813	0.987576	0.978503	0.929016	0.10925
CNIH3	0.988669	0.989707	0.978492	0.929027	0.109305
PDZD11	0.989319	0.989048	0.978485	0.929038	0.10936
BLOC1S2	0.989821	0.988522	0.97846	0.92905	0.109414
HIST1H4L	0.99461	0.983751	0.978449	0.929061	0.109469
PRAF2	0.99205	0.98629	0.978448	0.929072	0.109524
FAM200A	0.983681	0.994676	0.978444	0.929084	0.109578
FAM218A	0.991411	0.986919	0.978442	0.929095	0.109633
C5orf38	0.990134	0.98818	0.978431	0.929106	0.109687
RNASE11	0.991397	0.986919	0.978429	0.929117	0.109742
TMEM107	0.992022	0.98629	0.978422	0.929128	0.109797
C12orf74	0.991044	0.987261	0.978418	0.92914	0.109852
SNRPD3	0.990405	0.987891	0.978412	0.929151	0.109906
C15orf32	0.989876	0.988417	0.97841	0.929162	0.109961
EIF1AX	0.988154	0.990128	0.978399	0.929173	0.110016
DPPA5	0.991152	0.987129	0.978396	0.929184	0.11007
CTAG1B	0.991492	0.986788	0.978393	0.929195	0.110125
TMCO2	0.98875	0.989522	0.97839	0.929207	0.11018
PGPEP1L	0.99307	0.985215	0.978388	0.929218	0.110234
CDKN2C	0.991982	0.98629	0.978381	0.929229	0.110289
CNIH4	0.988181	0.990076	0.978374	0.92924	0.110344
PRR4	0.987517	0.990735	0.978368	0.929251	0.110399
ACP1	0.989523	0.988706	0.978348	0.929262	0.110453
HIST2H2BE	0.994965	0.98328	0.97833	0.929273	0.110507
ARPC5	0.992322	0.985897	0.978327	0.929284	0.110562
MCTS1	0.98852	0.98968	0.978318	0.929295	0.110616
DR1	0.989781	0.988417	0.978316	0.929306	0.110671
LGALS1	0.991411	0.986788	0.978312	0.929317	0.110725
C3orf18	0.992376	0.985792	0.978276	0.929328	0.11078
REG1A	0.990052	0.988101	0.978272	0.929339	0.110835
PLAC8L1	0.990921	0.987234	0.978272	0.92935	0.110888
OSTC	0.989808	0.988312	0.978239	0.929361	0.110943
IL19	0.988913	0.989206	0.978239	0.929372	0.110997
WDR20	0.992281	0.985844	0.978234	0.929383	0.111052
COPS8	0.989319	0.988785	0.978224	0.929394	0.111105
IL4	0.990867	0.987234	0.978218	0.929405	0.111159
ARL14	0.990256	0.987839	0.978213	0.929416	0.111214
FAM177B	0.987788	0.990287	0.978193	0.929427	0.111268
LHB	0.993479	0.984613	0.978193	0.929438	0.111323
TMEM242	0.990201	0.987865	0.978185	0.929449	0.111377
CTAG1A	0.991492	0.986578	0.978185	0.929459	0.11143
FAM19A4	0.991112	0.986946	0.978173	0.92947	0.111485
AP1S2	0.989469	0.988575	0.978164	0.929481	0.111539
TMEM50A	0.989062	0.988969	0.978152	0.929492	0.111594
PPIA	0.991859	0.986159	0.978131	0.929503	0.111648
CSN3	0.992063	0.985949	0.978124	0.929514	0.111702
CAV3	0.991873	0.986132	0.978118	0.929525	0.111756
CFL1	0.992213	0.985792	0.978115	0.929535	0.11181
HIST1H4K	0.995989	0.982054	0.978115	0.929546	0.111865
ZNRF1	0.989482	0.988496	0.978099	0.929557	0.11192
C5orf24	0.991655	0.986316	0.978085	0.929568	0.111975
LAGE3	0.991642	0.986316	0.978072	0.929578	0.112029
CCDC56	0.991587	0.986368	0.97807	0.929589	0.112083
IL26	0.988994	0.988943	0.978059	0.9296	0.112138
TP53TG3	0.991411	0.986526	0.978052	0.929611	0.112192
[truncated: 16,268 more rows]
